# Supplementary material
Source: publisher figshare collection journal article supplement (https://acs.figshare.com/ndownloader/files/3708910)
Supplement: Supplementary file 1 [file 3708910]

 
data_clw13 
  
_audit_creation_method            SHELXL-2013 
_chemical_name_systematic 
; 
 ? 
; 
_chemical_name_common             ? 
_chemical_melting_point           ? 
_chemical_formula_moiety          ? 
_chemical_formula_sum 
 'C39.50 H70 Cl3 N U' 
_chemical_formula_weight          903.34 
  
loop_ 
 _atom_type_symbol 
 _atom_type_description 
 _atom_type_scat_dispersion_real 
 _atom_type_scat_dispersion_imag 
 _atom_type_scat_source 
 'C'  'C'   0.0033   0.0016 
 'International Tables Vol C Tables 4.2.6.8 and 6.1.1.4' 
 'H'  'H'   0.0000   0.0000 
 'International Tables Vol C Tables 4.2.6.8 and 6.1.1.4' 
 'N'  'N'   0.0061   0.0033 
 'International Tables Vol C Tables 4.2.6.8 and 6.1.1.4' 
 'Cl'  'Cl'   0.1484   0.1585 
 'International Tables Vol C Tables 4.2.6.8 and 6.1.1.4' 
 'U'  'U'  -9.6767   9.6646 
 'International Tables Vol C Tables 4.2.6.8 and 6.1.1.4' 
  
_space_group_crystal_system       triclinic 
_space_group_IT_number            2 
_space_group_name_H-M_alt         'P -1' 
_space_group_name_Hall            '-P 1' 
  
_shelx_space_group_comment 
; 
The symmetry employed for this shelxl refinement is uniquely defined 
by the following loop, which should always be used as a source of 
symmetry information in preference to the above space-group names. 
They are only intended as comments. 
; 
  
loop_ 
 _space_group_symop_operation_xyz 
 'x, y, z' 
 '-x, -y, -z' 
  
_cell_length_a                    11.3610(7) 
_cell_length_b                    11.5361(7) 
_cell_length_c                    17.3158(10) 
_cell_angle_alpha                 79.0585(6) 
_cell_angle_beta                  89.4727(6) 
_cell_angle_gamma                 66.6659(6) 
_cell_volume                      2040.5(2) 
_cell_formula_units_Z             2 
_cell_measurement_temperature     143(2) 
_cell_measurement_reflns_used     9875 
_cell_measurement_theta_min       2.33 
_cell_measurement_theta_max       28.19 
  
_exptl_crystal_description        prism 
_exptl_crystal_colour             orange 
_exptl_crystal_density_meas       none 
_exptl_crystal_density_method     none 
_exptl_crystal_density_diffrn     1.470 
_exptl_crystal_F_000              914 
_exptl_transmission_factor_min    ? 
_exptl_transmission_factor_max    ? 
_exptl_crystal_size_max           0.292 
_exptl_crystal_size_mid           0.198 
_exptl_crystal_size_min           0.116 
_exptl_absorpt_coefficient_mu     4.200 
_shelx_estimated_absorpt_T_min    0.373 
_shelx_estimated_absorpt_T_max    0.641 
_exptl_absorpt_correction_type    numerical 
_exptl_absorpt_correction_T_min   0.4991 
_exptl_absorpt_correction_T_max   0.7188 
_exptl_absorpt_process_details    'Bruker SADABS' 
  
_exptl_special_details 
; 
 ? 
; 
  
_diffrn_ambient_temperature       143(2) 
_diffrn_radiation_wavelength      0.71073 
_diffrn_radiation_type            MoK\a 
_diffrn_source                    ? 
_diffrn_measurement_device_type   'Bruker APEX-II CCD' 
_diffrn_measurement_method        '\f and \w scans' 
_diffrn_detector_area_resol_mean  ? 
_diffrn_reflns_number             23718 
_diffrn_reflns_av_unetI/netI      0.0194 
_diffrn_reflns_av_R_equivalents   0.0159 
_diffrn_reflns_limit_h_min        -14 
_diffrn_reflns_limit_h_max        15 
_diffrn_reflns_limit_k_min        -15 
_diffrn_reflns_limit_k_max        15 
_diffrn_reflns_limit_l_min        -22 
_diffrn_reflns_limit_l_max        23 
_diffrn_reflns_theta_min          1.957 
_diffrn_reflns_theta_max          28.419 
_diffrn_reflns_theta_full         25.500 
_diffrn_measured_fraction_theta_max   0.912 
_diffrn_measured_fraction_theta_full  0.998 
_diffrn_reflns_Laue_measured_fraction_max    0.912 
_diffrn_reflns_Laue_measured_fraction_full   0.998 
_diffrn_reflns_point_group_measured_fraction_max   0.912 
_diffrn_reflns_point_group_measured_fraction_full  0.998 
_reflns_number_total              9361 
_reflns_number_gt                 8926 
_reflns_threshold_expression      'I > 2\s(I)' 
_reflns_Friedel_coverage          0.000 
_reflns_Friedel_fraction_max      . 
_reflns_Friedel_fraction_full     . 
  
_reflns_special_details 
; 
 Reflections were merged by SHELXL according to the crystal 
 class for the calculation of statistics and refinement. 
  
 _reflns_Friedel_fraction is defined as the number of unique 
 Friedel pairs measured divided by the number that would be 
 possible theoretically, ignoring centric projections and 
 systematic absences. 
; 
  
_computing_data_collection        'Bruker APEX2' 
_computing_cell_refinement        'Bruker SAINT' 
_computing_data_reduction         'Bruker SAINT' 
_computing_structure_solution     'SHELXS-97 (Sheldrick, 2008)' 
_computing_structure_refinement   'SHELXL-2013 (Sheldrick, 2013)' 
_computing_molecular_graphics     'Bruker SHELXTL' 
_computing_publication_material   'Bruker SHELXTL' 
  
_refine_special_details 
; 
 ? 
; 
_refine_ls_structure_factor_coef  Fsqd 
_refine_ls_matrix_type            full 
_refine_ls_weighting_scheme       calc 
_refine_ls_weighting_details 
; 
 w=1/[\s^2^(Fo^2^)+(0.0232P)^2^+0.7294P] 
 where P=(Fo^2^+2Fc^2^)/3 
; 
_atom_sites_solution_primary      direct 
_atom_sites_solution_secondary    difmap 
_atom_sites_solution_hydrogens    geom 
_refine_ls_hydrogen_treatment     constr 
_refine_ls_extinction_method      none 
_refine_ls_extinction_coef        ? 
_refine_ls_number_reflns          9361 
_refine_ls_number_parameters      427 
_refine_ls_number_restraints      0 
_refine_ls_R_factor_all           0.0183 
_refine_ls_R_factor_gt            0.0167 
_refine_ls_wR_factor_ref          0.0410 
_refine_ls_wR_factor_gt           0.0403 
_refine_ls_goodness_of_fit_ref    1.032 
_refine_ls_restrained_S_all       1.032 
_refine_ls_shift/su_max           0.001 
_refine_ls_shift/su_mean          0.000 
  
loop_ 
 _atom_site_label 
 _atom_site_type_symbol 
 _atom_site_fract_x 
 _atom_site_fract_y 
 _atom_site_fract_z 
 _atom_site_U_iso_or_equiv 
 _atom_site_adp_type 
 _atom_site_occupancy 
 _atom_site_site_symmetry_order 
 _atom_site_calc_flag 
 _atom_site_refinement_flags_posn 
 _atom_site_refinement_flags_adp 
 _atom_site_refinement_flags_occupancy 
 _atom_site_disorder_assembly 
 _atom_site_disorder_group 
U1 U 0.23275(2) 0.08496(2) 0.26495(2) 0.01578(3) Uani 1 1 d . . . . . 
Cl1 Cl 0.42811(5) -0.08337(5) 0.20172(3) 0.02927(11) Uani 1 1 d . . . . . 
Cl2 Cl 0.22747(6) 0.21720(5) 0.11826(3) 0.03345(12) Uani 1 1 d . . . . . 
Cl3 Cl 0.03622(5) 0.31305(4) 0.26206(3) 0.02681(10) Uani 1 1 d . . . . . 
N1 N 0.83079(14) 0.74406(15) 0.12406(9) 0.0186(3) Uani 1 1 d . . . . . 
C1 C 0.44410(18) 0.12101(19) 0.31072(11) 0.0215(4) Uani 1 1 d . . . . . 
C2 C 0.45697(18) 0.00427(19) 0.36151(12) 0.0227(4) Uani 1 1 d . . . . . 
C3 C 0.35879(18) 0.03312(18) 0.41423(11) 0.0211(4) Uani 1 1 d . . . . . 
C4 C 0.28352(18) 0.16765(18) 0.39589(11) 0.0193(4) Uani 1 1 d . . . . . 
C5 C 0.33712(18) 0.22244(18) 0.33196(11) 0.0196(4) Uani 1 1 d . . . . . 
C6 C 0.5344(2) 0.1377(2) 0.24964(13) 0.0307(5) Uani 1 1 d . . . . . 
H6A H 0.6023 0.1540 0.2740 0.046 Uiso 1 1 calc R U . . . 
H6B H 0.4867 0.2108 0.2069 0.046 Uiso 1 1 calc R U . . . 
H6C H 0.5729 0.0591 0.2283 0.046 Uiso 1 1 calc R U . . . 
C7 C 0.5677(2) -0.1244(2) 0.36986(14) 0.0348(5) Uani 1 1 d . . . . . 
H7A H 0.6246 -0.1386 0.4161 0.052 Uiso 1 1 calc R U . . . 
H7B H 0.6157 -0.1263 0.3225 0.052 Uiso 1 1 calc R U . . . 
H7C H 0.5352 -0.1925 0.3765 0.052 Uiso 1 1 calc R U . . . 
C8 C 0.3581(2) -0.0607(2) 0.48750(12) 0.0284(4) Uani 1 1 d . . . . . 
H8A H 0.4294 -0.0759 0.5249 0.043 Uiso 1 1 calc R U . . . 
H8B H 0.3678 -0.1423 0.4736 0.043 Uiso 1 1 calc R U . . . 
H8C H 0.2765 -0.0249 0.5117 0.043 Uiso 1 1 calc R U . . . 
C9 C 0.1771(2) 0.2403(2) 0.44274(12) 0.0259(4) Uani 1 1 d . . . . . 
H9A H 0.2119 0.2720 0.4818 0.039 Uiso 1 1 calc R U . . . 
H9B H 0.1385 0.1828 0.4698 0.039 Uiso 1 1 calc R U . . . 
H9C H 0.1114 0.3134 0.4072 0.039 Uiso 1 1 calc R U . . . 
C10 C 0.2972(2) 0.36361(19) 0.29708(12) 0.0256(4) Uani 1 1 d . . . . . 
H10A H 0.3585 0.3937 0.3167 0.038 Uiso 1 1 calc R U . . . 
H10B H 0.2112 0.4126 0.3124 0.038 Uiso 1 1 calc R U . . . 
H10C H 0.2962 0.3764 0.2395 0.038 Uiso 1 1 calc R U . . . 
C11 C 0.1356(2) -0.0726(2) 0.21433(12) 0.0261(4) Uani 1 1 d . . . . . 
C12 C 0.1887(2) -0.13819(18) 0.29234(12) 0.0234(4) Uani 1 1 d . . . . . 
C13 C 0.10965(18) -0.06609(18) 0.34493(11) 0.0210(4) Uani 1 1 d . . . . . 
C14 C 0.00928(18) 0.04304(19) 0.29997(12) 0.0224(4) Uani 1 1 d . . . . . 
C15 C 0.0255(2) 0.0398(2) 0.21909(12) 0.0257(4) Uani 1 1 d . . . . . 
C16 C 0.1809(3) -0.1191(3) 0.13945(14) 0.0398(6) Uani 1 1 d . . . . . 
H16A H 0.1121 -0.1313 0.1130 0.060 Uiso 1 1 calc R U . . . 
H16B H 0.2563 -0.2011 0.1521 0.060 Uiso 1 1 calc R U . . . 
H16C H 0.2040 -0.0550 0.1045 0.060 Uiso 1 1 calc R U . . . 
C17 C 0.2973(2) -0.2688(2) 0.31582(15) 0.0366(5) Uani 1 1 d . . . . . 
H17A H 0.2647 -0.3359 0.3166 0.055 Uiso 1 1 calc R U . . . 
H17B H 0.3350 -0.2777 0.3685 0.055 Uiso 1 1 calc R U . . . 
H17C H 0.3632 -0.2779 0.2777 0.055 Uiso 1 1 calc R U . . . 
C18 C 0.1096(2) -0.1097(2) 0.43240(12) 0.0291(4) Uani 1 1 d . . . . . 
H18A H 0.0365 -0.1335 0.4437 0.044 Uiso 1 1 calc R U . . . 
H18B H 0.1024 -0.0394 0.4588 0.044 Uiso 1 1 calc R U . . . 
H18C H 0.1898 -0.1845 0.4517 0.044 Uiso 1 1 calc R U . . . 
C19 C -0.1062(2) 0.1312(2) 0.33419(15) 0.0342(5) Uani 1 1 d . . . . . 
H19A H -0.1593 0.0846 0.3547 0.051 Uiso 1 1 calc R U . . . 
H19B H -0.1567 0.2057 0.2930 0.051 Uiso 1 1 calc R U . . . 
H19C H -0.0778 0.1608 0.3771 0.051 Uiso 1 1 calc R U . . . 
C20 C -0.0618(2) 0.1340(2) 0.15052(14) 0.0386(6) Uani 1 1 d . . . . . 
H20A H -0.1507 0.1449 0.1590 0.058 Uiso 1 1 calc R U . . . 
H20B H -0.0364 0.1013 0.1020 0.058 Uiso 1 1 calc R U . . . 
H20C H -0.0553 0.2172 0.1457 0.058 Uiso 1 1 calc R U . . . 
C21 C 0.71259(17) 0.85745(17) 0.08046(11) 0.0193(4) Uani 1 1 d . . . . . 
H21A H 0.6999 0.8409 0.0278 0.023 Uiso 1 1 calc R U . . . 
H21B H 0.6366 0.8597 0.1096 0.023 Uiso 1 1 calc R U . . . 
C22 C 0.71658(18) 0.99025(18) 0.06931(12) 0.0211(4) Uani 1 1 d . . . . . 
H22A H 0.7311 1.0084 0.1212 0.025 Uiso 1 1 calc R U . . . 
H22B H 0.7883 0.9924 0.0370 0.025 Uiso 1 1 calc R U . . . 
C23 C 0.58961(18) 1.09209(18) 0.02846(12) 0.0226(4) Uani 1 1 d . . . . . 
H23A H 0.5773 1.0747 -0.0241 0.027 Uiso 1 1 calc R U . . . 
H23B H 0.5182 1.0862 0.0598 0.027 Uiso 1 1 calc R U . . . 
C24 C 0.5851(2) 1.22771(19) 0.01855(14) 0.0300(5) Uani 1 1 d . . . . . 
H24A H 0.5019 1.2901 -0.0075 0.045 Uiso 1 1 calc R U . . . 
H24B H 0.6542 1.2347 -0.0137 0.045 Uiso 1 1 calc R U . . . 
H24C H 0.5962 1.2457 0.0705 0.045 Uiso 1 1 calc R U . . . 
C25 C 0.85283(19) 0.77353(18) 0.20333(11) 0.0219(4) Uani 1 1 d . . . . . 
H25A H 0.8948 0.8350 0.1942 0.026 Uiso 1 1 calc R U . . . 
H25B H 0.7676 0.8185 0.2226 0.026 Uiso 1 1 calc R U . . . 
C26 C 0.9319(2) 0.6621(2) 0.26878(12) 0.0275(4) Uani 1 1 d . . . . . 
H26A H 1.0177 0.6143 0.2512 0.033 Uiso 1 1 calc R U . . . 
H26B H 0.8889 0.6020 0.2823 0.033 Uiso 1 1 calc R U . . . 
C27 C 0.9460(2) 0.7149(2) 0.34056(12) 0.0279(4) Uani 1 1 d . . . . . 
H27A H 0.9869 0.7766 0.3257 0.034 Uiso 1 1 calc R U . . . 
H27B H 0.8594 0.7627 0.3573 0.034 Uiso 1 1 calc R U . . . 
C28 C 1.0250(2) 0.6111(2) 0.40918(13) 0.0332(5) Uani 1 1 d . . . . . 
H28A H 1.0272 0.6500 0.4544 0.050 Uiso 1 1 calc R U . . . 
H28B H 1.1127 0.5674 0.3943 0.050 Uiso 1 1 calc R U . . . 
H28C H 0.9863 0.5483 0.4233 0.050 Uiso 1 1 calc R U . . . 
C29 C 0.80584(19) 0.62288(18) 0.13120(12) 0.0231(4) Uani 1 1 d . . . . . 
H29A H 0.8822 0.5491 0.1593 0.028 Uiso 1 1 calc R U . . . 
H29B H 0.7970 0.6082 0.0775 0.028 Uiso 1 1 calc R U . . . 
C30 C 0.6883(2) 0.6230(2) 0.17347(14) 0.0290(4) Uani 1 1 d . . . . . 
H30A H 0.6095 0.6896 0.1430 0.035 Uiso 1 1 calc R U . . . 
H30B H 0.6920 0.6433 0.2262 0.035 Uiso 1 1 calc R U . . . 
C31 C 0.6848(2) 0.4908(2) 0.18195(17) 0.0392(6) Uani 1 1 d . . . . . 
H31A H 0.6852 0.4700 0.1290 0.047 Uiso 1 1 calc R U . . . 
H31B H 0.7633 0.4254 0.2133 0.047 Uiso 1 1 calc R U . . . 
C32 C 0.5689(3) 0.4834(3) 0.22104(19) 0.0486(7) Uani 1 1 d . . . . . 
H32A H 0.5714 0.3965 0.2254 0.073 Uiso 1 1 calc R U . . . 
H32B H 0.4909 0.5464 0.1894 0.073 Uiso 1 1 calc R U . . . 
H32C H 0.5687 0.5026 0.2738 0.073 Uiso 1 1 calc R U . . . 
C33 C 0.94314(18) 0.73099(19) 0.07249(11) 0.0215(4) Uani 1 1 d . . . . . 
H33A H 0.9176 0.7230 0.0199 0.026 Uiso 1 1 calc R U . . . 
H33B H 0.9558 0.8124 0.0653 0.026 Uiso 1 1 calc R U . . . 
C34 C 1.07193(18) 0.62044(19) 0.10068(12) 0.0252(4) Uani 1 1 d . . . . . 
H34A H 1.0610 0.5382 0.1145 0.030 Uiso 1 1 calc R U . . . 
H34B H 1.1083 0.6342 0.1482 0.030 Uiso 1 1 calc R U . . . 
C35 C 1.16223(19) 0.6151(2) 0.03429(13) 0.0262(4) Uani 1 1 d . . . . . 
H35A H 1.1293 0.5924 -0.0109 0.031 Uiso 1 1 calc R U . . . 
H35B H 1.1632 0.7014 0.0163 0.031 Uiso 1 1 calc R U . . . 
C36 C 1.2983(2) 0.5173(2) 0.06004(15) 0.0358(5) Uani 1 1 d . . . . . 
H36A H 1.3531 0.5181 0.0161 0.054 Uiso 1 1 calc R U . . . 
H36B H 1.2982 0.4312 0.0761 0.054 Uiso 1 1 calc R U . . . 
H36C H 1.3315 0.5396 0.1046 0.054 Uiso 1 1 calc R U . . . 
C37 C 0.5619(3) 0.5749(3) 0.51493(17) 0.0569(8) Uani 1 1 d . . . . . 
H37A H 0.6050 0.6266 0.5254 0.068 Uiso 1 1 calc R U . A 1 
C39 C 0.5470(3) 0.4178(3) 0.44842(17) 0.0560(8) Uani 1 1 d . . . . . 
H39A H 0.5796 0.3609 0.4130 0.067 Uiso 1 1 calc R U . B 1 
C38A C 0.6098(3) 0.4932(3) 0.46281(18) 0.056(6) Uani 0.5 1 d . . P C 1 
C40 C 0.7224(7) 0.4900(9) 0.4211(5) 0.061(2) Uani 0.5 1 d . . P C 1 
H40A H 0.7742 0.4015 0.4152 0.092 Uiso 0.5 1 calc R U P C 1 
H40B H 0.7738 0.5196 0.4512 0.092 Uiso 0.5 1 calc R U P C 1 
H40C H 0.6951 0.5465 0.3689 0.092 Uiso 0.5 1 calc R U P C 1 
C38B C 0.6098(3) 0.4932(3) 0.46281(18) 0.054(5) Uani 0.5 1 d . . P C 2 
H38B H 0.6853 0.4890 0.4371 0.065 Uiso 0.5 1 calc R U P C 2 
  
loop_ 
 _atom_site_aniso_label 
 _atom_site_aniso_U_11 
 _atom_site_aniso_U_22 
 _atom_site_aniso_U_33 
 _atom_site_aniso_U_23 
 _atom_site_aniso_U_13 
 _atom_site_aniso_U_12 
U1 0.01781(4) 0.01621(4) 0.01343(4) -0.00268(2) 0.00156(2) -0.00710(3) 
Cl1 0.0292(2) 0.0324(3) 0.0295(3) -0.0158(2) 0.0131(2) -0.0118(2) 
Cl2 0.0487(3) 0.0388(3) 0.0160(2) 0.0019(2) 0.0004(2) -0.0242(3) 
Cl3 0.0216(2) 0.0180(2) 0.0355(3) -0.00295(19) -0.00484(19) -0.00338(17) 
N1 0.0170(7) 0.0188(7) 0.0178(8) -0.0026(6) 0.0003(6) -0.0054(6) 
C1 0.0191(9) 0.0264(10) 0.0204(9) -0.0059(8) 0.0008(7) -0.0102(8) 
C2 0.0185(9) 0.0236(10) 0.0232(10) -0.0058(8) -0.0033(7) -0.0050(7) 
C3 0.0233(9) 0.0223(9) 0.0169(9) -0.0031(7) -0.0033(7) -0.0085(8) 
C4 0.0219(9) 0.0217(9) 0.0156(9) -0.0062(7) -0.0003(7) -0.0088(7) 
C5 0.0218(9) 0.0212(9) 0.0189(9) -0.0062(7) -0.0011(7) -0.0108(7) 
C6 0.0246(10) 0.0391(12) 0.0338(12) -0.0100(9) 0.0094(9) -0.0174(9) 
C7 0.0265(11) 0.0300(11) 0.0372(13) -0.0071(9) -0.0038(9) 0.0002(9) 
C8 0.0348(11) 0.0275(10) 0.0207(10) 0.0018(8) -0.0032(8) -0.0131(9) 
C9 0.0279(10) 0.0265(10) 0.0213(10) -0.0084(8) 0.0059(8) -0.0074(8) 
C10 0.0303(10) 0.0219(10) 0.0261(10) -0.0037(8) 0.0010(8) -0.0126(8) 
C11 0.0367(11) 0.0285(10) 0.0242(10) -0.0099(8) 0.0065(9) -0.0228(9) 
C12 0.0288(10) 0.0190(9) 0.0258(10) -0.0048(8) 0.0077(8) -0.0134(8) 
C13 0.0222(9) 0.0217(9) 0.0213(9) -0.0028(7) 0.0054(7) -0.0119(8) 
C14 0.0214(9) 0.0226(9) 0.0260(10) -0.0034(8) 0.0027(8) -0.0123(8) 
C15 0.0292(10) 0.0275(10) 0.0256(10) -0.0010(8) -0.0033(8) -0.0187(9) 
C16 0.0584(16) 0.0528(15) 0.0308(12) -0.0235(11) 0.0157(11) -0.0395(13) 
C17 0.0399(13) 0.0204(10) 0.0458(14) -0.0053(9) 0.0156(11) -0.0091(9) 
C18 0.0317(11) 0.0345(11) 0.0221(10) -0.0012(9) 0.0064(8) -0.0162(9) 
C19 0.0242(10) 0.0309(11) 0.0451(14) -0.0050(10) 0.0089(10) -0.0100(9) 
C20 0.0416(13) 0.0444(14) 0.0334(12) 0.0059(10) -0.0161(10) -0.0267(11) 
C21 0.0160(8) 0.0190(9) 0.0203(9) -0.0038(7) -0.0002(7) -0.0045(7) 
C22 0.0195(9) 0.0188(9) 0.0236(10) -0.0037(7) 0.0025(7) -0.0066(7) 
C23 0.0202(9) 0.0201(9) 0.0246(10) -0.0026(7) 0.0021(7) -0.0061(7) 
C24 0.0304(11) 0.0206(10) 0.0346(12) -0.0025(8) 0.0053(9) -0.0070(8) 
C25 0.0243(9) 0.0222(9) 0.0183(9) -0.0047(7) 0.0010(7) -0.0082(8) 
C26 0.0336(11) 0.0225(10) 0.0209(10) -0.0032(8) -0.0009(8) -0.0059(8) 
C27 0.0296(11) 0.0301(11) 0.0223(10) -0.0088(8) 0.0008(8) -0.0085(9) 
C28 0.0409(13) 0.0287(11) 0.0230(11) -0.0058(9) 0.0012(9) -0.0064(10) 
C29 0.0230(9) 0.0181(9) 0.0278(10) -0.0045(8) 0.0002(8) -0.0079(7) 
C30 0.0285(11) 0.0253(10) 0.0348(12) -0.0043(9) 0.0027(9) -0.0133(9) 
C31 0.0292(11) 0.0259(11) 0.0599(16) -0.0016(11) 0.0046(11) -0.0116(9) 
C32 0.0437(15) 0.0444(15) 0.0657(19) -0.0065(13) 0.0107(13) -0.0285(13) 
C33 0.0191(9) 0.0236(9) 0.0185(9) -0.0031(7) 0.0027(7) -0.0054(7) 
C34 0.0183(9) 0.0237(10) 0.0277(10) -0.0015(8) 0.0027(8) -0.0041(8) 
C35 0.0217(10) 0.0248(10) 0.0286(11) -0.0063(8) 0.0054(8) -0.0051(8) 
C36 0.0235(11) 0.0264(11) 0.0483(14) 0.0005(10) 0.0108(10) -0.0043(9) 
C37 0.078(2) 0.0442(16) 0.0420(16) 0.0169(13) -0.0187(15) -0.0281(15) 
C39 0.081(2) 0.0357(15) 0.0393(15) 0.0106(12) -0.0108(15) -0.0184(15) 
C38A 0.048(7) 0.071(11) 0.032(5) 0.015(14) 0.000(14) -0.018(12) 
C40 0.058(4) 0.066(4) 0.053(4) 0.010(3) -0.015(3) -0.027(4) 
C38B 0.064(7) 0.045(8) 0.041(6) 0.015(13) -0.012(15) -0.019(11) 
  
_geom_special_details 
; 
 All esds (except the esd in the dihedral angle between two l.s. planes) 
 are estimated using the full covariance matrix.  The cell esds are taken 
 into account individually in the estimation of esds in distances, angles 
 and torsion angles; correlations between esds in cell parameters are only 
 used when they are defined by crystal symmetry.  An approximate (isotropic) 
 treatment of cell esds is used for estimating esds involving l.s. planes. 
; 
  
loop_ 
 _geom_bond_atom_site_label_1 
 _geom_bond_atom_site_label_2 
 _geom_bond_distance 
 _geom_bond_site_symmetry_2 
 _geom_bond_publ_flag 
U1 Cnt1 2.492 . ? 
U1 Cnt2 2.501 . ? 
U1 Cl3 2.6850(5) . ? 
U1 Cl2 2.6912(5) . ? 
U1 Cl1 2.6915(5) . ? 
U1 C5 2.7351(18) . ? 
U1 C11 2.7391(19) . ? 
U1 C1 2.7418(19) . ? 
U1 C15 2.7592(19) . ? 
U1 C12 2.7669(19) . ? 
U1 C4 2.7685(18) . ? 
U1 C2 2.7858(19) . ? 
U1 C14 2.8072(19) . ? 
U1 C13 2.8087(18) . ? 
U1 C3 2.8093(18) . ? 
N1 C29 1.516(2) . ? 
N1 C25 1.521(2) . ? 
N1 C33 1.526(2) . ? 
N1 C21 1.529(2) . ? 
C1 C2 1.416(3) . ? 
C1 C5 1.418(3) . ? 
C1 C6 1.506(3) . ? 
C2 C3 1.411(3) . ? 
C2 C7 1.500(3) . ? 
C3 C4 1.417(3) . ? 
C3 C8 1.505(3) . ? 
C4 C5 1.422(3) . ? 
C4 C9 1.503(3) . ? 
C5 C10 1.506(3) . ? 
C11 C15 1.416(3) . ? 
C11 C12 1.424(3) . ? 
C11 C16 1.506(3) . ? 
C12 C13 1.417(3) . ? 
C12 C17 1.504(3) . ? 
C13 C14 1.414(3) . ? 
C13 C18 1.503(3) . ? 
C14 C15 1.416(3) . ? 
C14 C19 1.504(3) . ? 
C15 C20 1.501(3) . ? 
C21 C22 1.526(3) . ? 
C22 C23 1.524(3) . ? 
C23 C24 1.521(3) . ? 
C25 C26 1.515(3) . ? 
C26 C27 1.520(3) . ? 
C27 C28 1.510(3) . ? 
C29 C30 1.517(3) . ? 
C30 C31 1.520(3) . ? 
C31 C32 1.500(3) . ? 
C33 C34 1.518(3) . ? 
C34 C35 1.527(3) . ? 
C35 C36 1.517(3) . ? 
C37 C39 1.365(5) 2_666 ? 
C37 C38A 1.381(5) . ? 
C39 C37 1.365(5) 2_666 ? 
C39 C38A 1.380(5) . ? 
C38A C40 1.454(7) . ? 
  
loop_ 
 _geom_angle_atom_site_label_1 
 _geom_angle_atom_site_label_2 
 _geom_angle_atom_site_label_3 
 _geom_angle 
 _geom_angle_site_symmetry_1 
 _geom_angle_site_symmetry_3 
 _geom_angle_publ_flag 
Cnt1 U1 Cl1 94.0 . . ? 
Cnt1 U1 Cl2 113.5 . . ? 
Cnt1 U1 Cl3 96.2 . . ? 
Cnt2 U1 Cl1 95.9 . . ? 
Cnt2 U1 Cl2 113.1 . . ? 
Cnt2 U1 Cl3 94.5 . . ? 
Cnt1 U1 Cnt2 133.4 . . ? 
Cl3 U1 Cl2 76.943(17) . . ? 
Cl3 U1 Cl1 153.848(17) . . ? 
Cl2 U1 Cl1 76.907(18) . . ? 
Cl3 U1 C5 75.49(4) . . ? 
Cl2 U1 C5 92.94(4) . . ? 
Cl1 U1 C5 105.62(4) . . ? 
Cl3 U1 C11 107.55(5) . . ? 
Cl2 U1 C11 93.54(4) . . ? 
Cl1 U1 C11 74.39(5) . . ? 
C5 U1 C11 173.34(6) . . ? 
Cl3 U1 C1 104.13(4) . . ? 
Cl2 U1 C1 90.85(4) . . ? 
Cl1 U1 C1 75.99(4) . . ? 
C5 U1 C1 30.00(6) . . ? 
C11 U1 C1 148.19(6) . . ? 
Cl3 U1 C15 77.86(5) . . ? 
Cl2 U1 C15 89.77(4) . . ? 
Cl1 U1 C15 102.31(5) . . ? 
C5 U1 C15 151.83(6) . . ? 
C11 U1 C15 29.85(6) . . ? 
C1 U1 C15 178.00(6) . . ? 
Cl3 U1 C12 119.63(4) . . ? 
Cl2 U1 C12 122.07(4) . . ? 
Cl1 U1 C12 75.49(4) . . ? 
C5 U1 C12 143.38(6) . . ? 
C11 U1 C12 29.97(6) . . ? 
C1 U1 C12 128.96(6) . . ? 
C15 U1 C12 49.25(6) . . ? 
Cl3 U1 C4 74.85(4) . . ? 
Cl2 U1 C4 120.94(4) . . ? 
Cl1 U1 C4 119.36(4) . . ? 
C5 U1 C4 29.95(5) . . ? 
C11 U1 C4 144.31(6) . . ? 
C1 U1 C4 49.22(6) . . ? 
C15 U1 C4 131.75(6) . . ? 
C12 U1 C4 116.99(6) . . ? 
Cl3 U1 C2 121.74(4) . . ? 
Cl2 U1 C2 116.85(4) . . ? 
Cl1 U1 C2 71.02(4) . . ? 
C5 U1 C2 49.08(6) . . ? 
C11 U1 C2 125.89(6) . . ? 
C1 U1 C2 29.67(6) . . ? 
C15 U1 C2 148.87(6) . . ? 
C12 U1 C2 100.44(6) . . ? 
C4 U1 C2 48.74(5) . . ? 
Cl3 U1 C14 71.08(4) . . ? 
Cl2 U1 C14 114.90(4) . . ? 
Cl1 U1 C14 121.23(4) . . ? 
C5 U1 C14 129.08(6) . . ? 
C11 U1 C14 48.69(6) . . ? 
C1 U1 C14 150.89(6) . . ? 
C15 U1 C14 29.47(6) . . ? 
C12 U1 C14 48.62(6) . . ? 
C4 U1 C14 103.16(6) . . ? 
C2 U1 C14 128.24(6) . . ? 
Cl3 U1 C13 95.84(4) . . ? 
Cl2 U1 C13 138.06(4) . . ? 
Cl1 U1 C13 103.76(4) . . ? 
C5 U1 C13 125.66(6) . . ? 
C11 U1 C13 48.72(6) . . ? 
C1 U1 C13 130.54(6) . . ? 
C15 U1 C13 48.63(6) . . ? 
C12 U1 C13 29.44(5) . . ? 
C4 U1 C13 95.73(6) . . ? 
C2 U1 C13 102.21(6) . . ? 
C14 U1 C13 29.16(6) . . ? 
Cl3 U1 C3 102.53(4) . . ? 
Cl2 U1 C3 138.73(4) . . ? 
Cl1 U1 C3 96.90(4) . . ? 
C5 U1 C3 48.84(6) . . ? 
C11 U1 C3 124.51(6) . . ? 
C1 U1 C3 48.67(6) . . ? 
C15 U1 C3 130.98(6) . . ? 
C12 U1 C3 94.54(6) . . ? 
C4 U1 C3 29.42(5) . . ? 
C2 U1 C3 29.21(6) . . ? 
C14 U1 C3 103.27(6) . . ? 
C13 U1 C3 83.19(6) . . ? 
C29 N1 C25 113.33(15) . . ? 
C29 N1 C33 107.99(14) . . ? 
C25 N1 C33 112.38(14) . . ? 
C29 N1 C21 107.93(14) . . ? 
C25 N1 C21 107.67(14) . . ? 
C33 N1 C21 107.30(14) . . ? 
C2 C1 C5 108.05(17) . . ? 
C2 C1 C6 126.43(18) . . ? 
C5 C1 C6 125.31(18) . . ? 
C2 C1 U1 76.88(11) . . ? 
C5 C1 U1 74.73(10) . . ? 
C6 C1 U1 118.76(13) . . ? 
C3 C2 C1 108.08(17) . . ? 
C3 C2 C7 123.98(19) . . ? 
C1 C2 C7 127.02(19) . . ? 
C3 C2 U1 76.32(11) . . ? 
C1 C2 U1 73.44(11) . . ? 
C7 C2 U1 124.94(14) . . ? 
C2 C3 C4 108.28(17) . . ? 
C2 C3 C8 123.22(18) . . ? 
C4 C3 C8 127.04(18) . . ? 
C2 C3 U1 74.47(11) . . ? 
C4 C3 U1 73.69(10) . . ? 
C8 C3 U1 128.70(13) . . ? 
C3 C4 C5 107.76(16) . . ? 
C3 C4 C9 125.45(17) . . ? 
C5 C4 C9 126.36(17) . . ? 
C3 C4 U1 76.89(10) . . ? 
C5 C4 U1 73.73(10) . . ? 
C9 C4 U1 121.29(13) . . ? 
C1 C5 C4 107.82(16) . . ? 
C1 C5 C10 125.00(18) . . ? 
C4 C5 C10 126.95(17) . . ? 
C1 C5 U1 75.26(10) . . ? 
C4 C5 U1 76.33(10) . . ? 
C10 C5 U1 118.89(12) . . ? 
C15 C11 C12 108.34(18) . . ? 
C15 C11 C16 125.2(2) . . ? 
C12 C11 C16 126.3(2) . . ? 
C15 C11 U1 75.86(11) . . ? 
C12 C11 U1 76.10(11) . . ? 
C16 C11 U1 118.23(13) . . ? 
C13 C12 C11 107.39(18) . . ? 
C13 C12 C17 125.50(19) . . ? 
C11 C12 C17 126.63(19) . . ? 
C13 C12 U1 76.92(11) . . ? 
C11 C12 U1 73.94(11) . . ? 
C17 C12 U1 121.31(14) . . ? 
C14 C13 C12 108.33(17) . . ? 
C14 C13 C18 123.24(18) . . ? 
C12 C13 C18 126.95(18) . . ? 
C14 C13 U1 75.36(11) . . ? 
C12 C13 U1 73.64(11) . . ? 
C18 C13 U1 128.04(13) . . ? 
C13 C14 C15 108.23(17) . . ? 
C13 C14 C19 124.21(19) . . ? 
C15 C14 C19 126.66(19) . . ? 
C13 C14 U1 75.48(11) . . ? 
C15 C14 U1 73.39(11) . . ? 
C19 C14 U1 125.74(13) . . ? 
C11 C15 C14 107.71(18) . . ? 
C11 C15 C20 125.7(2) . . ? 
C14 C15 C20 126.5(2) . . ? 
C11 C15 U1 74.29(11) . . ? 
C14 C15 U1 77.14(11) . . ? 
C20 C15 U1 117.13(13) . . ? 
C22 C21 N1 116.26(15) . . ? 
C23 C22 C21 109.34(15) . . ? 
C24 C23 C22 112.05(17) . . ? 
C26 C25 N1 118.22(16) . . ? 
C25 C26 C27 108.88(16) . . ? 
C28 C27 C26 113.05(18) . . ? 
N1 C29 C30 116.04(16) . . ? 
C29 C30 C31 109.00(18) . . ? 
C32 C31 C30 112.6(2) . . ? 
C34 C33 N1 118.02(15) . . ? 
C33 C34 C35 108.26(16) . . ? 
C36 C35 C34 112.20(18) . . ? 
C39 C37 C38A 120.6(3) 2_666 . ? 
C37 C39 C38A 120.1(3) 2_666 . ? 
C39 C38A C37 119.3(3) . . ? 
C39 C38A C40 120.1(5) . . ? 
C37 C38A C40 120.5(5) . . ? 
  
_refine_diff_density_max    0.871 
_refine_diff_density_min   -0.290 
_refine_diff_density_rms    0.068 
  
_shelxl_version_number 2013-2 
  
_shelx_res_file 
; 
TITL clw13 in P-1 
CELL 0.71073  11.3610  11.5361  17.3158  79.0585  89.4727  66.6659 
ZERR    2.00   0.0007   0.0007   0.0010   0.0006   0.0006   0.0006 
LATT  1 
SFAC C H N CL U 
UNIT 79 140 2 6 2 
TEMP -130.000 
SIZE 0.116 0.198 0.292 
  
exyz c38a c38b 
  
CONN U1 14 
  
BIND U1 C1 U1 C2 U1 C3 U1 C4 U1 C5 
BIND U1 C11 U1 C12 U1 C13 U1 C14 U1 C15 
BIND U1 CL1 U1 CL2 U1 CL3 
  
L.S. 12 
ACTA 51 
  
FMAP 2 
PLAN 10 
  
WGHT    0.023200    0.729400 
FVAR       0.12379 
U1    5    0.232748    0.084963    0.264954    11.00000    0.01781    0.01621 = 
         0.01343   -0.00268    0.00156   -0.00710 
CL1   4    0.428109   -0.083370    0.201724    11.00000    0.02921    0.03243 = 
         0.02950   -0.01585    0.01314   -0.01177 
CL2   4    0.227471    0.217200    0.118260    11.00000    0.04872    0.03878 = 
         0.01604    0.00189    0.00044   -0.02419 
CL3   4    0.036216    0.313053    0.262064    11.00000    0.02161    0.01796 = 
         0.03553   -0.00295   -0.00484   -0.00338 
N1    3    0.830791    0.744061    0.124064    11.00000    0.01700    0.01879 = 
         0.01779   -0.00258    0.00032   -0.00540 
C1    1    0.444098    0.121007    0.310725    11.00000    0.01913    0.02642 = 
         0.02041   -0.00595    0.00084   -0.01022 
C2    1    0.456973    0.004268    0.361513    11.00000    0.01848    0.02360 = 
         0.02319   -0.00580   -0.00325   -0.00500 
C3    1    0.358791    0.033120    0.414230    11.00000    0.02325    0.02234 = 
         0.01689   -0.00310   -0.00334   -0.00848 
C4    1    0.283523    0.167647    0.395895    11.00000    0.02188    0.02174 = 
         0.01555   -0.00617   -0.00033   -0.00883 
C5    1    0.337118    0.222436    0.331956    11.00000    0.02183    0.02120 = 
         0.01889   -0.00618   -0.00109   -0.01075 
C6    1    0.534374    0.137689    0.249643    11.00000    0.02455    0.03910 = 
         0.03385   -0.01003    0.00938   -0.01740 
AFIX 137 
H6A   2    0.602313    0.154046    0.273973    11.00000   -1.50000 
H6B   2    0.486658    0.210773    0.206926    11.00000   -1.50000 
H6C   2    0.572911    0.059107    0.228271    11.00000   -1.50000 
AFIX   0 
C7    1    0.567721   -0.124425    0.369864    11.00000    0.02645    0.02997 = 
         0.03724   -0.00706   -0.00377    0.00020 
AFIX 137 
H7A   2    0.624602   -0.138579    0.416057    11.00000   -1.50000 
H7B   2    0.615710   -0.126309    0.322469    11.00000   -1.50000 
H7C   2    0.535205   -0.192464    0.376522    11.00000   -1.50000 
AFIX   0 
C8    1    0.358066   -0.060692    0.487496    11.00000    0.03475    0.02751 = 
         0.02065    0.00180   -0.00322   -0.01307 
AFIX 137 
H8A   2    0.429369   -0.075865    0.524889    11.00000   -1.50000 
H8B   2    0.367842   -0.142330    0.473563    11.00000   -1.50000 
H8C   2    0.276514   -0.024948    0.511729    11.00000   -1.50000 
AFIX   0 
C9    1    0.177074    0.240266    0.442739    11.00000    0.02791    0.02653 = 
         0.02133   -0.00838    0.00586   -0.00735 
AFIX 137 
H9A   2    0.211918    0.271965    0.481761    11.00000   -1.50000 
H9B   2    0.138500    0.182768    0.469825    11.00000   -1.50000 
H9C   2    0.111405    0.313408    0.407169    11.00000   -1.50000 
AFIX   0 
C10   1    0.297241    0.363607    0.297085    11.00000    0.03027    0.02193 = 
         0.02606   -0.00368    0.00102   -0.01264 
AFIX 137 
H10A  2    0.358458    0.393739    0.316689    11.00000   -1.50000 
H10B  2    0.211166    0.412571    0.312417    11.00000   -1.50000 
H10C  2    0.296158    0.376351    0.239463    11.00000   -1.50000 
AFIX   0 
C11   1    0.135553   -0.072568    0.214330    11.00000    0.03665    0.02853 = 
         0.02418   -0.00991    0.00652   -0.02275 
C12   1    0.188686   -0.138189    0.292338    11.00000    0.02885    0.01901 = 
         0.02583   -0.00479    0.00772   -0.01338 
C13   1    0.109653   -0.066091    0.344932    11.00000    0.02221    0.02168 = 
         0.02134   -0.00282    0.00543   -0.01192 
C14   1    0.009282    0.043037    0.299968    11.00000    0.02137    0.02259 = 
         0.02600   -0.00342    0.00267   -0.01234 
C15   1    0.025456    0.039768    0.219095    11.00000    0.02923    0.02752 = 
         0.02562   -0.00101   -0.00327   -0.01870 
C16   1    0.180936   -0.119053    0.139449    11.00000    0.05842    0.05283 = 
         0.03078   -0.02353    0.01571   -0.03954 
AFIX 137 
H16A  2    0.112055   -0.131257    0.112995    11.00000   -1.50000 
H16B  2    0.256323   -0.201136    0.152088    11.00000   -1.50000 
H16C  2    0.203967   -0.055021    0.104528    11.00000   -1.50000 
AFIX   0 
C17   1    0.297337   -0.268782    0.315825    11.00000    0.03991    0.02038 = 
         0.04579   -0.00530    0.01561   -0.00909 
AFIX 137 
H17A  2    0.264663   -0.335860    0.316577    11.00000   -1.50000 
H17B  2    0.334956   -0.277706    0.368452    11.00000   -1.50000 
H17C  2    0.363186   -0.277870    0.277748    11.00000   -1.50000 
AFIX   0 
C18   1    0.109600   -0.109654    0.432395    11.00000    0.03167    0.03445 = 
         0.02208   -0.00121    0.00638   -0.01624 
AFIX 137 
H18A  2    0.036522   -0.133477    0.443686    11.00000   -1.50000 
H18B  2    0.102403   -0.039436    0.458850    11.00000   -1.50000 
H18C  2    0.189840   -0.184464    0.451697    11.00000   -1.50000 
AFIX   0 
C19   1   -0.106159    0.131204    0.334188    11.00000    0.02422    0.03094 = 
         0.04509   -0.00504    0.00892   -0.01000 
AFIX 137 
H19A  2   -0.159252    0.084554    0.354718    11.00000   -1.50000 
H19B  2   -0.156663    0.205728    0.293031    11.00000   -1.50000 
H19C  2   -0.077760    0.160761    0.377106    11.00000   -1.50000 
AFIX   0 
C20   1   -0.061803    0.133981    0.150521    11.00000    0.04164    0.04444 = 
         0.03338    0.00591   -0.01609   -0.02674 
AFIX 137 
H20A  2   -0.150662    0.144886    0.159034    11.00000   -1.50000 
H20B  2   -0.036387    0.101339    0.102006    11.00000   -1.50000 
H20C  2   -0.055340    0.217243    0.145744    11.00000   -1.50000 
AFIX   0 
C21   1    0.712594    0.857450    0.080456    11.00000    0.01600    0.01900 = 
         0.02029   -0.00377   -0.00019   -0.00445 
AFIX  23 
H21A  2    0.699859    0.840911    0.027767    11.00000   -1.20000 
H21B  2    0.636562    0.859727    0.109574    11.00000   -1.20000 
AFIX   0 
C22   1    0.716579    0.990248    0.069314    11.00000    0.01952    0.01884 = 
         0.02356   -0.00371    0.00246   -0.00657 
AFIX  23 
H22A  2    0.731079    1.008379    0.121220    11.00000   -1.20000 
H22B  2    0.788290    0.992376    0.036977    11.00000   -1.20000 
AFIX   0 
C23   1    0.589609    1.092086    0.028461    11.00000    0.02017    0.02013 = 
         0.02463   -0.00263    0.00207   -0.00607 
AFIX  23 
H23A  2    0.577307    1.074737   -0.024055    11.00000   -1.20000 
H23B  2    0.518164    1.086159    0.059818    11.00000   -1.20000 
AFIX   0 
C24   1    0.585059    1.227706    0.018554    11.00000    0.03038    0.02059 = 
         0.03457   -0.00254    0.00525   -0.00704 
AFIX 137 
H24A  2    0.501886    1.290132   -0.007493    11.00000   -1.50000 
H24B  2    0.654204    1.234687   -0.013696    11.00000   -1.50000 
H24C  2    0.596156    1.245669    0.070467    11.00000   -1.50000 
AFIX   0 
C25   1    0.852831    0.773530    0.203329    11.00000    0.02425    0.02221 = 
         0.01826   -0.00473    0.00102   -0.00816 
AFIX  23 
H25A  2    0.894848    0.835010    0.194225    11.00000   -1.20000 
H25B  2    0.767620    0.818490    0.222638    11.00000   -1.20000 
AFIX   0 
C26   1    0.931900    0.662127    0.268776    11.00000    0.03357    0.02255 = 
         0.02087   -0.00316   -0.00092   -0.00593 
AFIX  23 
H26A  2    1.017749    0.614322    0.251206    11.00000   -1.20000 
H26B  2    0.888860    0.601999    0.282329    11.00000   -1.20000 
AFIX   0 
C27   1    0.945967    0.714896    0.340557    11.00000    0.02957    0.03007 = 
         0.02233   -0.00882    0.00084   -0.00845 
AFIX  23 
H27A  2    0.986930    0.776602    0.325729    11.00000   -1.20000 
H27B  2    0.859445    0.762683    0.357282    11.00000   -1.20000 
AFIX   0 
C28   1    1.024963    0.611065    0.409178    11.00000    0.04087    0.02871 = 
         0.02301   -0.00576    0.00119   -0.00638 
AFIX 137 
H28A  2    1.027198    0.650046    0.454442    11.00000   -1.50000 
H28B  2    1.112705    0.567449    0.394297    11.00000   -1.50000 
H28C  2    0.986258    0.548308    0.423332    11.00000   -1.50000 
AFIX   0 
C29   1    0.805839    0.622884    0.131204    11.00000    0.02303    0.01806 = 
         0.02779   -0.00451    0.00025   -0.00785 
AFIX  23 
H29A  2    0.882208    0.549059    0.159316    11.00000   -1.20000 
H29B  2    0.797029    0.608157    0.077461    11.00000   -1.20000 
AFIX   0 
C30   1    0.688297    0.622984    0.173469    11.00000    0.02849    0.02530 = 
         0.03479   -0.00426    0.00274   -0.01335 
AFIX  23 
H30A  2    0.609491    0.689573    0.142995    11.00000   -1.20000 
H30B  2    0.691976    0.643293    0.226202    11.00000   -1.20000 
AFIX   0 
C31   1    0.684847    0.490784    0.181946    11.00000    0.02925    0.02591 = 
         0.05993   -0.00158    0.00457   -0.01162 
AFIX  23 
H31A  2    0.685226    0.469954    0.129027    11.00000   -1.20000 
H31B  2    0.763317    0.425354    0.213339    11.00000   -1.20000 
AFIX   0 
C32   1    0.568886    0.483444    0.221038    11.00000    0.04374    0.04443 = 
         0.06573   -0.00649    0.01070   -0.02851 
AFIX 137 
H32A  2    0.571378    0.396540    0.225397    11.00000   -1.50000 
H32B  2    0.490863    0.546358    0.189440    11.00000   -1.50000 
H32C  2    0.568677    0.502639    0.273810    11.00000   -1.50000 
AFIX   0 
C33   1    0.943141    0.730991    0.072489    11.00000    0.01907    0.02359 = 
         0.01846   -0.00314    0.00269   -0.00543 
AFIX  23 
H33A  2    0.917650    0.722988    0.019884    11.00000   -1.20000 
H33B  2    0.955847    0.812360    0.065294    11.00000   -1.20000 
AFIX   0 
C34   1    1.071934    0.620445    0.100677    11.00000    0.01832    0.02369 = 
         0.02768   -0.00145    0.00273   -0.00406 
AFIX  23 
H34A  2    1.061019    0.538163    0.114487    11.00000   -1.20000 
H34B  2    1.108277    0.634211    0.148181    11.00000   -1.20000 
AFIX   0 
C35   1    1.162229    0.615096    0.034286    11.00000    0.02166    0.02476 = 
         0.02860   -0.00634    0.00535   -0.00512 
AFIX  23 
H35A  2    1.129269    0.592444   -0.010861    11.00000   -1.20000 
H35B  2    1.163238    0.701417    0.016278    11.00000   -1.20000 
AFIX   0 
C36   1    1.298293    0.517346    0.060043    11.00000    0.02347    0.02640 = 
         0.04826    0.00052    0.01082   -0.00432 
AFIX 137 
H36A  2    1.353074    0.518078    0.016061    11.00000   -1.50000 
H36B  2    1.298217    0.431216    0.076114    11.00000   -1.50000 
H36C  2    1.331493    0.539591    0.104593    11.00000   -1.50000 
AFIX   0 
C37   1    0.561853    0.574931    0.514933    11.00000    0.07758    0.04419 = 
         0.04204    0.01686   -0.01872   -0.02815 
AFIX  43 
H37A  2    0.605011    0.626596    0.525386    11.00000   -1.20000 
AFIX   0 
C39   1    0.547026    0.417845    0.448418    11.00000    0.08066    0.03573 = 
         0.03934    0.01057   -0.01080   -0.01842 
AFIX  43 
H39A  2    0.579597    0.360851    0.412961    11.00000   -1.20000 
AFIX   0 
PART 1 
C38A  1    0.609842    0.493227    0.462806    10.50000    0.04836    0.07111 = 
         0.03200    0.01529   -0.00008   -0.01771 
C40   1    0.722429    0.489960    0.421123    10.50000    0.05767    0.06584 = 
         0.05277    0.00956   -0.01456   -0.02652 
AFIX 137 
H40A  2    0.774213    0.401540    0.415190    10.50000   -1.50000 
H40B  2    0.773845    0.519609    0.451174    10.50000   -1.50000 
H40C  2    0.695122    0.546528    0.368907    10.50000   -1.50000 
AFIX   0 
PART 2 
C38B  1    0.609842    0.493227    0.462806    10.50000    0.06428    0.04508 = 
         0.04094    0.01454   -0.01208   -0.01883 
AFIX  43 
H38B  2    0.685280    0.488957    0.437129    10.50000   -1.20000 
PART 0 
  
AFIX   0 
HKLF 4 
  
REM  clw13 in P-1 
REM R1 =  0.0167 for    8926 Fo > 4sig(Fo)  and  0.0183 for all    9361 data 
REM    427 parameters refined using      0 restraints 
  
END 
  
WGHT      0.0232      0.7293 
  
REM Highest difference peak  0.871,  deepest hole -0.290,  1-sigma level  0.068 
Q1    1   0.1691  0.1038  0.2870  11.00000  0.05    0.87 
Q2    1   0.1810  0.1074  0.2262  11.00000  0.05    0.87 
Q3    1   0.2996  0.0718  0.2378  11.00000  0.05    0.82 
Q4    1   0.2362  0.0104  0.2686  11.00000  0.05    0.77 
Q5    1   0.2803  0.0615  0.3081  11.00000  0.05    0.76 
Q6    1   0.2394  0.1568  0.2624  11.00000  0.05    0.73 
Q7    1   0.6574  0.4307  0.1659  11.00000  0.05    0.58 
Q8    1   0.6673  0.5028  0.2305  11.00000  0.05    0.47 
Q9    1   0.6585  0.4829  0.4443  11.00000  0.05    0.43 
Q10   1   0.1433 -0.1068  0.3180  11.00000  0.05    0.40 
; 
_shelx_res_checksum   63555 
  
_shelx_hkl_file 
; 
  -1   0   0   18.28    0.36 
   1   0   0   18.36    0.36 
  -2   0   0  229.77    3.70 
  -2   0   0  229.16    3.78 
   2   0   0  233.84    3.65 
   2   0   0  230.20    3.72 
  -3   0   0    8.43    0.34 
  -3   0   0    8.67    0.27 
   3   0   0    8.32    0.24 
   3   0   0    8.35    0.32 
  -4   0   0  201.57    3.33 
  -4   0   0  205.71    3.48 
   4   0   0  199.34    3.27 
   4   0   0  199.59    3.42 
  -5   0   0   88.53    1.76 
  -5   0   0   89.71    1.61 
   5   0   0   86.88    1.74 
   5   0   0   87.70    1.55 
  -6   0   0  147.70    2.58 
  -6   0   0  147.15    2.78 
   6   0   0  148.86    2.75 
   6   0   0  147.33    2.51 
  -7   0   0   14.53    0.64 
  -7   0   0   15.18    0.51 
   7   0   0   16.53    0.69 
   7   0   0   15.88    0.48 
  -8   0   0    3.72    0.43 
  -8   0   0    3.17    0.30 
   8   0   0    3.21    0.41 
  -9   0   0   65.35    1.68 
   9   0   0   62.57    1.63 
 -10   0   0   21.44    0.97 
  10   0   0   23.26    0.99 
 -11   0   0   55.73    1.68 
  11   0   0   56.49    1.68 
 -12   0   0    0.74    0.46 
  12   0   0    0.71    0.46 
 -13   0   0   23.25    1.19 
  13   0   0   21.36    1.14 
 -13   1   0   14.36    1.01 
  12  -1   0    4.42    0.65 
 -12   1   0    3.47    0.62 
  11  -1   0   28.78    1.20 
 -11   1   0   29.73    1.22 
  10  -1   0    0.63    0.37 
 -10   1   0    0.63    0.39 
   9  -1   0  165.87    3.31 
  -9   1   0  160.55    3.34 
   8  -1   0   16.99    0.76 
  -8   1   0   17.30    0.79 
  -8   1   0   17.63    0.62 
  -7   1   0   33.64    0.88 
  -7   1   0   33.78    1.02 
   6  -1   0   11.17    0.35 
   6  -1   0   11.53    0.57 
  -6   1   0   10.59    0.44 
  -6   1   0   10.95    0.56 
   5  -1   0  293.68    4.65 
   5  -1   0  292.96    4.92 
  -5   1   0  284.90    4.99 
  -5   1   0  290.48    4.84 
   4  -1   0  110.79    1.83 
   4  -1   0  111.99    2.05 
  -4   1   0  110.23    2.07 
  -4   1   0  108.89    1.97 
   3  -1   0  527.82    8.24 
   3  -1   0  505.96    8.06 
  -3   1   0  519.81    8.38 
  -3   1   0  510.54    8.27 
   2  -1   0   52.70    0.88 
   2  -1   0   53.82    1.01 
  -2   1   0   53.33    0.98 
  -2   1   0   53.22    1.03 
   1  -1   0  273.56    4.34 
  -1   1   0  272.25    4.39 
  -1   1   0  275.01    4.42 
   0   1   0  643.84   10.10 
   0   1   0  667.25   10.33 
   0   1   0  610.15   10.30 
  -1  -1   0  304.01    4.96 
   1   1   0  305.05    4.81 
   1   1   0  305.13    4.79 
  -2  -1   0  318.05    5.12 
  -2  -1   0  323.15    5.18 
   2   1   0  327.03    5.09 
   2   1   0  316.75    5.08 
  -3  -1   0   24.86    0.59 
  -3  -1   0   24.71    0.48 
   3   1   0   25.39    0.53 
   3   1   0   24.84    0.58 
  -4  -1   0   91.83    1.71 
  -4  -1   0   90.12    1.55 
   4   1   0   90.83    1.60 
   4   1   0   92.22    1.69 
  -5  -1   0    0.58    0.18 
  -5  -1   0    0.52    0.12 
   5   1   0    0.44    0.13 
   5   1   0    0.59    0.17 
  -6  -1   0  402.94    6.76 
  -6  -1   0  397.49    6.49 
   6   1   0  399.57    6.47 
   6   1   0  405.62    6.65 
  -7  -1   0   18.73    0.53 
  -7  -1   0   18.58    0.72 
   7   1   0   18.86    0.55 
   7   1   0   19.17    0.73 
  -8  -1   0  120.49    2.50 
   8   1   0  121.77    2.21 
   8   1   0  121.94    2.48 
  -9  -1   0   22.43    0.88 
   9   1   0   21.02    0.88 
 -10  -1   0   73.62    1.85 
  10   1   0   67.37    1.78 
 -11  -1   0   12.67    0.82 
  11   1   0   11.41    0.78 
 -12  -1   0   31.54    1.28 
  12   1   0   32.46    1.28 
 -13  -1   0   17.81    1.05 
  13   1   0   18.64    1.02 
  12  -2   0   20.02    1.07 
 -12   2   0   19.73    1.10 
  11  -2   0   18.63    0.97 
 -11   2   0   18.05    0.99 
  10  -2   0   16.01    0.87 
 -10   2   0   18.99    0.95 
   9  -2   0  115.54    2.55 
  -9   2   0  115.58    2.59 
  -9   2   0  112.94    2.32 
   8  -2   0    8.61    0.59 
  -8   2   0    8.69    0.50 
  -8   2   0    9.45    0.60 
   7  -2   0   66.93    1.63 
  -7   2   0   66.51    1.62 
  -7   2   0   65.19    1.45 
   6  -2   0    0.29    0.25 
  -6   2   0    0.20    0.22 
  -6   2   0   -0.08    0.17 
   5  -2   0  132.67    2.49 
   5  -2   0  131.00    2.13 
  -5   2   0  127.41    2.49 
  -5   2   0  128.27    2.38 
   4  -2   0    0.22    0.07 
   4  -2   0    0.12    0.16 
  -4   2   0    0.13    0.14 
  -4   2   0    0.06    0.18 
   3  -2   0  394.67    6.18 
   3  -2   0  403.69    6.44 
  -3   2   0  394.36    6.55 
  -3   2   0  391.19    6.47 
   2  -2   0   25.91    0.44 
   2  -2   0   24.54    0.61 
  -2   2   0   25.99    0.64 
  -2   2   0   25.15    0.60 
   1  -2   0    5.51    0.23 
  -1   2   0    5.28    0.25 
  -1   2   0    5.41    0.24 
   0  -2   0   87.90    1.46 
   0   2   0   84.28    1.49 
   0   2   0   87.84    1.42 
   1   2   0  479.99    7.52 
   1   2   0  459.30    7.59 
   1   2   0  472.50    7.41 
   1   2   0  470.05    7.51 
  -2  -2   0   11.27    0.31 
  -2  -2   0   11.71    0.26 
   2   2   0   11.77    0.31 
  -3  -2   0  621.15    9.88 
  -3  -2   0  616.90    9.96 
   3   2   0  622.08    9.80 
   3   2   0  624.76    9.79 
  -4  -2   0  104.92    1.69 
  -4  -2   0  102.46    1.88 
   4   2   0  102.91    1.85 
   4   2   0   99.08    1.80 
  -5  -2   0   80.33    1.36 
  -5  -2   0   81.15    1.59 
   5   2   0   78.72    1.48 
   5   2   0   77.21    1.55 
  -6  -2   0  163.66    2.95 
  -6  -2   0  159.81    2.66 
   6   2   0  160.19    2.89 
   6   2   0  157.06    2.77 
  -7  -2   0   76.62    1.39 
  -7  -2   0   74.99    1.67 
   7   2   0   76.76    1.51 
   7   2   0   77.35    1.65 
  -8  -2   0  159.58    3.08 
   8   2   0  158.86    3.03 
   8   2   0  157.73    2.83 
  -9  -2   0    0.06    0.29 
   9   2   0    0.11    0.21 
   9   2   0    0.57    0.32 
 -10  -2   0   40.18    1.28 
  10   2   0   40.78    1.27 
 -11  -2   0    2.81    0.51 
  11   2   0    3.16    0.50 
 -12  -2   0   55.43    1.70 
  12   2   0   54.16    1.67 
 -13  -2   0    5.79    0.72 
  13   2   0    6.20    0.74 
 -14  -2   0   30.62    1.38 
  14   2   0   31.00    1.37 
 -12   3   0   33.91    1.43 
  11  -3   0    1.09    0.51 
 -11   3   0    1.49    0.52 
  10  -3   0   19.40    1.00 
 -10   3   0   19.43    0.99 
   9  -3   0    6.56    0.64 
  -9   3   0    6.79    0.55 
  -9   3   0    7.68    0.69 
   8  -3   0   53.21    1.50 
  -8   3   0   53.47    1.52 
  -8   3   0   53.11    1.35 
   7  -3   0   73.59    1.76 
  -7   3   0   69.58    1.60 
  -7   3   0   71.97    1.76 
   6  -3   0   53.15    1.37 
  -6   3   0   52.90    1.38 
  -6   3   0   54.32    1.28 
   5  -3   0   98.71    2.03 
  -5   3   0   99.50    1.97 
  -5   3   0   99.48    2.07 
   4  -3   0    4.06    0.36 
  -4   3   0    3.30    0.30 
  -4   3   0    3.37    0.33 
   3  -3   0  253.50    4.34 
  -3   3   0  264.24    4.44 
  -3   3   0  255.83    4.37 
   2  -3   0    1.94    0.12 
   2  -3   0    1.90    0.21 
  -2   3   0    1.83    0.22 
  -2   3   0    2.00    0.21 
   1  -3   0  227.91    3.58 
   1  -3   0  228.78    3.72 
  -1   3   0  225.85    3.80 
  -1   3   0  219.16    3.77 
   0  -3   0    8.54    0.29 
   0   3   0    8.18    0.25 
   0   3   0    8.45    0.31 
   0   3   0    8.32    0.32 
   1   3   0   13.13    0.35 
   1   3   0   14.03    0.38 
   1   3   0   13.71    0.36 
   2   3   0  212.97    3.50 
   2   3   0  211.09    3.56 
   2   3   0  217.43    3.47 
   2   3   0  215.47    3.49 
  -3  -3   0  992.90   15.43 
  -3  -3   0  941.26   15.74 
   3   3   0  972.21   15.54 
   3   3   0  965.50   15.47 
  -4  -3   0   23.40    0.61 
  -4  -3   0   23.99    0.48 
   4   3   0   22.62    0.59 
   4   3   0   24.40    0.62 
  -5  -3   0  123.76    2.00 
  -5  -3   0  120.79    2.25 
   5   3   0  120.82    2.21 
   5   3   0  120.97    2.18 
  -6  -3   0   12.04    0.50 
   6   3   0   11.61    0.50 
   6   3   0   12.50    0.46 
  -7  -3   0   79.19    1.39 
  -7  -3   0   79.78    1.73 
   7   3   0   81.11    1.70 
   7   3   0   79.83    1.60 
  -8  -3   0   78.07    1.74 
   8   3   0   75.63    1.57 
   8   3   0   74.24    1.69 
  -9  -3   0   49.68    1.36 
   9   3   0   50.99    1.21 
   9   3   0   52.37    1.37 
 -10  -3   0   66.36    1.71 
  10   3   0   64.08    1.67 
  10   3   0   65.46    1.49 
 -11  -3   0    1.83    0.42 
  11   3   0    1.00    0.40 
 -12  -3   0   35.00    1.28 
  12   3   0   36.57    1.30 
 -13  -3   0    2.25    0.55 
  13   3   0    1.48    0.49 
 -14  -3   0   46.37    1.67 
  14   3   0   45.91    1.64 
  11  -4   0    1.78    0.57 
 -11   4   0    1.78    0.56 
  10  -4   0   28.34    1.22 
 -10   4   0   28.60    1.21 
   9  -4   0    1.52    0.46 
  -9   4   0    1.33    0.38 
  -9   4   0    1.93    0.44 
   8  -4   0   30.66    1.12 
  -8   4   0   31.71    1.15 
  -8   4   0   30.71    1.02 
   7  -4   0    0.07    0.33 
  -7   4   0    0.45    0.29 
  -7   4   0    0.20    0.28 
   6  -4   0  205.60    3.83 
  -6   4   0  205.47    3.89 
  -6   4   0  203.66    3.76 
   5  -4   0   56.10    1.39 
  -5   4   0   56.82    1.43 
  -5   4   0   56.66    1.35 
   4  -4   0   26.83    0.83 
  -4   4   0   25.55    0.77 
  -4   4   0   24.99    0.82 
   3  -4   0   17.37    0.60 
  -3   4   0   17.61    0.60 
  -3   4   0   17.57    0.63 
   2  -4   0   84.05    1.65 
  -2   4   0   84.07    1.67 
  -2   4   0   85.46    1.70 
   1  -4   0   55.13    1.12 
   1  -4   0   56.13    0.97 
  -1   4   0   54.13    1.16 
  -1   4   0   53.82    1.16 
   0  -4   0  119.65    2.11 
   0   4   0  120.12    2.03 
   0   4   0  123.47    2.16 
   0   4   0  121.80    2.18 
   1   4   0  135.01    2.28 
   1   4   0  134.80    2.35 
   1   4   0  134.86    2.35 
   1   4   0  134.77    2.29 
   2   4   0    7.10    0.30 
   2   4   0    7.38    0.28 
   2   4   0    6.88    0.28 
   2   4   0    7.07    0.31 
  -3  -4   0  289.44    4.78 
  -3  -4   0  297.40    4.90 
   3   4   0  296.72    4.77 
   3   4   0  293.63    4.82 
  -4  -4   0   45.74    1.02 
  -4  -4   0   47.03    0.89 
   4   4   0   46.07    0.98 
   4   4   0   46.27    1.00 
  -5  -4   0  272.68    4.78 
  -5  -4   0  286.90    4.54 
   5   4   0  289.08    4.70 
   5   4   0  276.61    4.69 
  -6  -4   0   12.77    0.52 
   6   4   0   13.53    0.51 
   6   4   0   12.81    0.52 
  -7  -4   0   39.18    1.04 
   7   4   0   39.60    1.03 
   7   4   0   39.92    0.99 
  -8  -4   0   11.13    0.60 
   8   4   0   12.07    0.54 
   8   4   0   10.86    0.58 
  -9  -4   0  142.22    2.87 
   9   4   0  142.97    2.70 
   9   4   0  142.24    2.82 
 -10  -4   0   20.80    0.87 
  10   4   0   20.76    0.87 
  10   4   0   21.12    0.77 
 -11  -4   0   19.50    0.89 
  11   4   0   20.58    0.91 
  11   4   0   20.04    0.77 
 -12  -4   0   28.50    1.12 
  12   4   0   27.75    1.12 
 -13  -4   0   17.70    0.99 
  13   4   0   17.82    0.98 
 -14  -4   0   25.81    1.24 
  14   4   0   26.08    1.23 
 -11   5   0   16.71    1.07 
  10  -5   0   14.37    0.97 
 -10   5   0   17.69    1.02 
   9  -5   0    2.27    0.52 
  -9   5   0    3.11    0.48 
  -9   5   0    2.92    0.54 
   8  -5   0   44.08    1.43 
  -8   5   0   42.82    1.31 
  -8   5   0   44.62    1.44 
   7  -5   0    2.78    0.48 
  -7   5   0    2.71    0.47 
  -7   5   0    1.87    0.37 
   6  -5   0  166.65    3.31 
  -6   5   0  173.85    3.40 
  -6   5   0  165.88    3.26 
   5  -5   0    4.89    0.47 
  -5   5   0    4.87    0.45 
  -5   5   0    5.92    0.52 
   4  -5   0  115.00    2.32 
  -4   5   0  114.36    2.32 
  -4   5   0  115.43    2.37 
   3  -5   0   17.39    0.66 
  -3   5   0   19.19    0.70 
  -3   5   0   18.01    0.66 
   2  -5   0  180.81    3.26 
   2  -5   0  188.49    3.00 
  -2   5   0  187.46    3.37 
  -2   5   0  184.36    3.34 
   1  -5   0   17.13    0.55 
   1  -5   0   16.51    0.41 
  -1   5   0   17.64    0.59 
  -1   5   0   16.80    0.59 
   0  -5   0  262.66    4.35 
   0   5   0  266.09    4.46 
   0   5   0  262.32    4.25 
   0   5   0  256.03    4.44 
   1   5   0   48.53    1.05 
   1   5   0   48.38    1.05 
   1   5   0   50.01    0.99 
   1   5   0   49.40    1.01 
   2   5   0   19.58    0.54 
   2   5   0   19.11    0.52 
   2   5   0   18.42    0.52 
   2   5   0   20.02    0.56 
  -3  -5   0   92.76    1.70 
   3   5   0   93.67    1.75 
   3   5   0   95.30    1.79 
   3   5   0   94.93    1.71 
  -4  -5   0    9.65    0.34 
  -4  -5   0   10.17    0.41 
   4   5   0    8.83    0.37 
   4   5   0    9.18    0.41 
  -5  -5   0  107.27    2.09 
  -5  -5   0  109.74    1.90 
   5   5   0  105.54    2.04 
   5   5   0  113.13    2.03 
  -6  -5   0   12.12    0.52 
  -6  -5   0   13.53    0.37 
   6   5   0   12.87    0.51 
   6   5   0   13.59    0.53 
  -7  -5   0   57.42    1.36 
   7   5   0   55.86    1.32 
   7   5   0   56.20    1.28 
  -8  -5   0    4.63    0.42 
   8   5   0    4.92    0.44 
   8   5   0    4.61    0.40 
  -9  -5   0  133.56    2.73 
   9   5   0  131.75    2.67 
   9   5   0  133.90    2.59 
 -10  -5   0    3.39    0.45 
  10   5   0    3.70    0.47 
  10   5   0    3.40    0.41 
 -11  -5   0   99.41    2.35 
  11   5   0  103.98    2.33 
  11   5   0  102.31    2.18 
 -12  -5   0    6.20    0.64 
  12   5   0    6.28    0.54 
  12   5   0    6.92    0.66 
 -13  -5   0   31.04    1.23 
  13   5   0   31.00    1.23 
 -14  -5   0    3.43    0.63 
  14   5   0    3.81    0.63 
  15   5   0   37.08    1.49 
 -10   6   0    6.76    0.77 
   9  -6   0   49.28    1.65 
  -9   6   0   47.59    1.63 
  -9   6   0   51.11    1.55 
   8  -6   0   30.57    1.23 
  -8   6   0   31.12    1.24 
  -8   6   0   33.40    1.18 
   7  -6   0   20.70    0.96 
  -7   6   0   20.40    0.95 
  -7   6   0   19.55    0.89 
   6  -6   0   41.17    1.29 
  -6   6   0   41.29    1.31 
  -6   6   0   39.75    1.22 
   5  -6   0   82.49    1.93 
  -5   6   0   81.49    1.92 
  -5   6   0   85.51    2.00 
   4  -6   0   49.99    1.32 
  -4   6   0   50.99    1.38 
  -4   6   0   49.47    1.33 
   3  -6   0   21.27    0.75 
  -3   6   0   21.16    0.77 
  -3   6   0   20.89    0.79 
   2  -6   0  107.03    2.13 
  -2   6   0  105.87    2.19 
  -2   6   0  110.59    2.20 
   1  -6   0   11.44    0.36 
   1  -6   0   10.63    0.47 
  -1   6   0   11.81    0.52 
  -1   6   0   11.35    0.54 
   0  -6   0  253.24    4.31 
   0   6   0  257.92    4.19 
   0   6   0  253.09    4.43 
   0   6   0  257.38    4.41 
  -1  -6   0   19.76    0.59 
   1   6   0   20.41    0.57 
   1   6   0   21.05    0.63 
   1   6   0   19.45    0.64 
   2   6   0  186.27    3.15 
   2   6   0  185.54    3.16 
   2   6   0  183.08    3.25 
   2   6   0  180.40    3.22 
   3   6   0  238.57    4.06 
   3   6   0  238.56    4.13 
   3   6   0  240.09    4.06 
   3   6   0  241.87    4.01 
  -4  -6   0   60.19    1.30 
  -4  -6   0   57.02    1.18 
   4   6   0   60.19    1.21 
   4   6   0   57.71    1.27 
  -5  -6   0   63.28    1.23 
  -5  -6   0   64.97    1.40 
   5   6   0   62.33    1.37 
   5   6   0   62.97    1.31 
  -6  -6   0  142.19    2.42 
  -6  -6   0  138.64    2.65 
   6   6   0  139.51    2.57 
   6   6   0  137.83    2.60 
  -7  -6   0   37.47    1.03 
   7   6   0   36.93    1.00 
   7   6   0   37.07    1.00 
  -8  -6   0   21.42    0.80 
   8   6   0   21.00    0.76 
   8   6   0   19.46    0.78 
  -9  -6   0   80.60    1.91 
   9   6   0   85.26    1.90 
   9   6   0   85.03    1.86 
 -10  -6   0   25.35    0.99 
  10   6   0   26.27    0.96 
  10   6   0   26.46    0.90 
 -11  -6   0   46.58    1.43 
  11   6   0   46.35    1.32 
  11   6   0   49.00    1.42 
 -12  -6   0   20.43    0.95 
  12   6   0   20.98    0.88 
  12   6   0   21.15    0.96 
 -13  -6   0   45.48    1.54 
  13   6   0   46.18    1.36 
  13   6   0   43.23    1.47 
 -14  -6   0    0.58    0.44 
  14   6   0   -0.12    0.44 
  -9   7   0   33.47    1.29 
   8  -7   0   -0.08    0.46 
  -8   7   0    0.57    0.44 
  -8   7   0    0.10    0.43 
   7  -7   0   46.35    1.51 
  -7   7   0   45.02    1.44 
  -7   7   0   47.67    1.55 
   6  -7   0   16.61    0.86 
  -6   7   0   14.73    0.81 
  -6   7   0   15.45    0.85 
   5  -7   0   43.40    1.33 
  -5   7   0   43.71    1.36 
  -5   7   0   45.90    1.35 
   4  -7   0    1.90    0.39 
  -4   7   0    2.23    0.41 
  -4   7   0    2.83    0.43 
   3  -7   0  120.30    2.45 
  -3   7   0  121.44    2.52 
  -3   7   0  119.23    2.52 
   2  -7   0  101.16    2.12 
  -2   7   0  106.03    2.22 
  -2   7   0  104.71    2.19 
   1  -7   0   36.76    0.99 
  -1   7   0   36.20    1.01 
   0  -7   0  167.81    2.81 
   0  -7   0  160.98    2.94 
   0   7   0  167.29    3.07 
   0   7   0  157.38    3.02 
  -1  -7   0   45.22    1.07 
   1   7   0   46.98    1.02 
   1   7   0   46.28    1.15 
   1   7   0   46.80    1.12 
   2   7   0  190.02    3.41 
   2   7   0  192.75    3.32 
   2   7   0  191.07    3.42 
   2   7   0  189.84    3.31 
   3   7   0   63.76    1.41 
   3   7   0   65.88    1.34 
   3   7   0   63.50    1.37 
   3   7   0   65.19    1.37 
  -4  -7   0  161.47    2.99 
  -4  -7   0  163.69    2.89 
   4   7   0  163.85    3.00 
   4   7   0  158.25    2.93 
   4   7   0  164.82    2.87 
  -5  -7   0   32.39    0.79 
  -5  -7   0   31.82    0.91 
   5   7   0   32.30    0.84 
  -6  -7   0  121.67    2.40 
   6   7   0  119.77    2.37 
   6   7   0  121.46    2.27 
  -7  -7   0    0.45    0.26 
   7   7   0    0.55    0.26 
   7   7   0    0.40    0.23 
  -8  -7   0  178.64    3.46 
   8   7   0  177.98    3.39 
   8   7   0  187.71    3.37 
  -9  -7   0   65.66    1.63 
   9   7   0   64.47    1.58 
   9   7   0   63.76    1.58 
 -10  -7   0   35.36    1.17 
  10   7   0   35.73    1.10 
  10   7   0   35.63    1.15 
 -11  -7   0   35.71    1.24 
  11   7   0   38.25    1.17 
  11   7   0   35.45    1.21 
 -12  -7   0   81.72    2.12 
  12   7   0   83.45    2.01 
  12   7   0   85.78    2.11 
 -13  -7   0   33.68    1.31 
  13   7   0   32.61    1.17 
 -14  -7   0    5.61    0.69 
  14   7   0    5.83    0.63 
  -8   8   0    2.99    0.58 
   7  -8   0   39.62    1.43 
  -7   8   0   38.73    1.39 
   6  -8   0    2.65    0.49 
  -6   8   0    2.92    0.51 
  -6   8   0    2.72    0.53 
   5  -8   0   59.31    1.65 
  -5   8   0   59.14    1.68 
  -5   8   0   58.81    1.66 
   4  -8   0    0.41    0.35 
  -4   8   0    0.68    0.36 
  -4   8   0    0.61    0.34 
   3  -8   0   93.31    2.09 
  -3   8   0   97.56    2.17 
  -3   8   0   91.48    2.14 
   2  -8   0    9.55    0.58 
  -2   8   0    9.75    0.59 
  -2   8   0    9.78    0.60 
   1  -8   0  117.34    2.35 
  -1   8   0  116.36    2.46 
  -1   8   0  119.75    2.42 
   0  -8   0    2.73    0.34 
   0   8   0    3.19    0.38 
   0   8   0    2.99    0.38 
  -1  -8   0   61.60    1.38 
   1   8   0   62.60    1.47 
   1   8   0   63.87    1.45 
   1   8   0   61.65    1.31 
  -2  -8   0   41.14    1.02 
   2   8   0   42.53    1.11 
   2   8   0   41.16    1.01 
   2   8   0   42.21    1.10 
   3   8   0  203.64    3.62 
   3   8   0  201.68    3.65 
   3   8   0  195.94    3.54 
   3   8   0  202.72    3.51 
  -4  -8   0  102.02    2.02 
   4   8   0  105.20    2.11 
   4   8   0  100.59    2.05 
   4   8   0  104.92    1.99 
  -5  -8   0   14.00    0.61 
  -5  -8   0   13.80    0.54 
   5   8   0   13.85    0.59 
   5   8   0   13.56    0.55 
  -6  -8   0  156.98    3.02 
   6   8   0  159.47    2.88 
   6   8   0  156.07    2.98 
  -7  -8   0    7.55    0.53 
   7   8   0    8.70    0.49 
   7   8   0    8.38    0.54 
  -8  -8   0  264.57    4.87 
   8   8   0  276.54    4.72 
   8   8   0  264.81    4.80 
  -9  -8   0    3.03    0.42 
   9   8   0    3.03    0.40 
   9   8   0    2.96    0.42 
 -10  -8   0   89.72    2.14 
  10   8   0   96.13    2.11 
  10   8   0   90.37    2.10 
 -11  -8   0    5.88    0.61 
  11   8   0    5.07    0.57 
  11   8   0    4.48    0.51 
 -12  -8   0   76.33    2.04 
  12   8   0   77.02    1.94 
 -13  -8   0   -0.33    0.36 
  13   8   0    0.38    0.40 
 -14  -8   0   33.78    1.37 
  14   8   0   35.10    1.29 
   6  -9   0   43.75    1.50 
  -6   9   0   44.93    1.52 
   5  -9   0   30.08    1.17 
  -5   9   0   28.50    1.17 
  -5   9   0   29.65    1.18 
   4  -9   0    4.96    0.58 
  -4   9   0    4.20    0.54 
  -4   9   0    4.42    0.56 
   3  -9   0   38.01    1.23 
  -3   9   0   37.72    1.28 
  -3   9   0   40.78    1.28 
   2  -9   0   14.83    0.73 
  -2   9   0   15.94    0.78 
  -2   9   0   15.90    0.77 
   1  -9   0   76.31    1.78 
  -1   9   0   79.71    1.84 
   0  -9   0    1.46    0.31 
   0   9   0    1.20    0.33 
   0   9   0    1.07    0.31 
  -1  -9   0   70.48    1.56 
   1   9   0   67.84    1.66 
   1   9   0   70.18    1.63 
  -2  -9   0   12.32    0.58 
   2   9   0   12.10    0.55 
   2   9   0   10.87    0.58 
   2   9   0   11.20    0.58 
   3   9   0  188.35    3.50 
   3   9   0  183.73    3.35 
   3   9   0  188.01    3.40 
   3   9   0  189.97    3.49 
  -4  -9   0    0.19    0.22 
   4   9   0    0.21    0.24 
   4   9   0    0.78    0.24 
   4   9   0   -0.08    0.23 
  -5  -9   0  154.16    3.01 
  -5  -9   0  155.52    2.89 
   5   9   0  158.33    2.86 
   5   9   0  154.31    2.97 
  -6  -9   0   37.51    1.09 
   6   9   0   34.64    0.97 
   6   9   0   35.48    1.05 
  -7  -9   0   64.76    1.61 
   7   9   0   66.78    1.48 
   7   9   0   62.74    1.58 
  -8  -9   0   52.61    1.44 
   8   9   0   57.54    1.37 
  -9  -9   0   69.92    1.74 
   9   9   0   65.73    1.70 
 -10  -9   0   28.33    1.06 
  10   9   0   29.00    1.06 
 -11  -9   0   11.32    0.71 
  11   9   0    8.68    0.63 
 -12  -9   0   52.90    1.64 
  12   9   0   53.45    1.58 
 -13  -9   0    4.06    0.63 
  13   9   0    3.43    0.56 
  14   9   0   26.10    1.15 
   5 -10   0    1.36    0.52 
  -5  10   0    0.59    0.43 
   4 -10   0   41.37    1.38 
  -4  10   0   40.03    1.42 
   3 -10   0   37.39    1.25 
  -3  10   0   35.34    1.30 
  -3  10   0   37.23    1.28 
   2 -10   0   30.68    1.08 
  -2  10   0   32.18    1.14 
  -2  10   0   28.72    1.11 
   1 -10   0   21.95    0.87 
  -1  10   0   19.95    0.89 
  -1  10   0   20.19    0.91 
   0 -10   0   42.53    1.20 
   0  10   0   42.87    1.26 
   0  10   0   41.27    1.28 
  -1 -10   0   22.33    0.81 
   1  10   0   21.87    0.85 
   1  10   0   22.94    0.92 
  -2 -10   0    3.80    0.40 
   2  10   0    2.18    0.39 
   2  10   0    2.89    0.40 
  -3 -10   0  129.79    2.51 
   3  10   0  127.69    2.63 
   3  10   0  129.22    2.53 
   3  10   0  128.93    2.63 
  -4 -10   0   10.85    0.59 
   4  10   0   10.54    0.58 
   4  10   0   10.68    0.60 
   4  10   0   10.72    0.56 
  -5 -10   0   78.61    1.85 
  -5 -10   0   79.24    1.76 
   5  10   0   85.07    1.75 
   5  10   0   80.28    1.83 
  -6 -10   0    3.71    0.45 
   6  10   0    3.73    0.39 
   6  10   0    2.98    0.41 
  -7 -10   0   77.20    1.83 
   7  10   0   73.74    1.80 
  -8 -10   0   14.88    0.73 
   8  10   0   14.52    0.75 
  -9 -10   0   53.42    1.51 
   9  10   0   51.90    1.49 
 -10 -10   0    0.59    0.37 
  10  10   0    0.78    0.35 
 -11 -10   0   46.46    1.47 
  11  10   0   43.76    1.42 
 -12 -10   0   25.30    1.13 
  12  10   0   26.86    1.10 
 -13 -10   0   21.93    1.11 
   4 -11   0   25.12    1.14 
   3 -11   0    0.38    0.41 
  -3  11   0    0.02    0.44 
   2 -11   0   69.19    1.82 
  -2  11   0   68.79    1.91 
   1 -11   0   10.21    0.67 
  -1  11   0   11.05    0.78 
  -1  11   0   11.98    0.73 
   0 -11   0   25.22    0.96 
   0  11   0   23.02    1.02 
   0  11   0   27.26    1.01 
  -1 -11   0    4.18    0.47 
   1  11   0    4.12    0.53 
   1  11   0    3.83    0.48 
  -2 -11   0   41.70    1.17 
   2  11   0   42.33    1.25 
   2  11   0   40.02    1.28 
  -3 -11   0   45.96    1.33 
   3  11   0   45.84    1.32 
  -4 -11   0   32.27    1.06 
   4  11   0   32.40    1.07 
   4  11   0   30.84    1.01 
  -5 -11   0   18.59    0.82 
   5  11   0   19.40    0.81 
  -6 -11   0   39.13    1.21 
   6  11   0   38.90    1.20 
  -7 -11   0   34.84    1.15 
   7  11   0   34.12    1.15 
  -8 -11   0    5.56    0.57 
   8  11   0    4.91    0.55 
  -9 -11   0   26.93    1.06 
   9  11   0   28.86    1.10 
 -10 -11   0    2.61    0.49 
  10  11   0    3.18    0.49 
 -11 -11   0   50.87    1.59 
  11  11   0   48.60    1.56 
 -12 -11   0    0.44    0.40 
  12  11   0    0.32    0.44 
 -13 -11   0   42.01    1.51 
   3 -12   0    5.50    0.68 
   2 -12   0   36.58    1.31 
  -2  12   0   36.92    1.42 
  -1  12   0   -0.65    0.39 
   0  12   0   40.39    1.41 
   1  12   0    5.58    0.58 
   1  12   0    4.10    0.55 
  -2 -12   0   40.70    1.34 
   2  12   0   42.61    1.34 
   2  12   0   41.76    1.37 
  -3 -12   0   10.14    0.68 
   3  12   0    9.57    0.65 
  -4 -12   0   50.22    1.43 
   4  12   0   48.11    1.42 
  -5 -12   0   10.94    0.69 
   5  12   0   10.96    0.68 
  -6 -12   0   42.77    1.34 
   6  12   0   44.51    1.33 
  -7 -12   0    4.40    0.53 
   7  12   0    4.81    0.56 
  -8 -12   0   25.65    1.05 
   8  12   0   26.55    1.04 
  -9 -12   0   29.57    1.15 
   9  12   0   30.45    1.18 
 -10 -12   0    7.68    0.72 
  10  12   0    7.63    0.72 
 -11 -12   0   25.37    1.14 
  11  12   0   26.44    1.16 
 -12 -12   0    6.44    0.74 
  12  12   0    5.12    0.69 
   0  13   0   44.57    1.58 
  -1 -13   0    6.00    0.68 
   1  13   0    5.97    0.67 
  -2 -13   0   60.82    1.77 
  -3 -13   0    1.59    0.46 
   3  13   0    1.62    0.45 
   4  13   0   39.65    1.31 
  -5 -13   0    1.25    0.41 
  -6 -13   0   60.15    1.70 
   6  13   0   61.56    1.68 
  -7 -13   0    0.81    0.40 
   7  13   0    0.17    0.37 
  -8 -13   0   39.36    1.36 
   8  13   0   38.90    1.35 
  -9 -13   0    0.79    0.41 
   9  13   0    0.90    0.45 
 -10 -13   0   18.29    0.97 
  10  13   0   17.59    0.95 
 -11 -13   0   21.67    1.10 
  -2 -14   0   22.08    1.11 
  -3 -14   0   32.55    1.29 
  -7 -14   0    2.31    0.52 
   7  14   0    1.51    0.49 
  -8 -14   0   31.67    1.25 
   8  14   0   32.05    1.27 
  -9 -14   0    0.22    0.40 
   9  14   0    0.09    0.43 
 -10 -14   0   26.96    1.18 
   9  14  -1   19.25    1.03 
  -9 -14   1   16.50    0.97 
   8  14  -1    0.81    0.47 
  -8 -14   1    2.01    0.51 
   7  14  -1   67.19    1.87 
  -7 -14   1   65.98    1.89 
  -6 -14   1   12.44    0.87 
  -5 -14   1   18.25    0.96 
  -3 -14   1    8.19    0.79 
  -2 -14   1   32.16    1.33 
 -11 -13   1   26.75    1.21 
  10  13  -1   25.83    1.18 
 -10 -13   1   26.48    1.17 
   9  13  -1   31.20    1.24 
  -9 -13   1   31.04    1.21 
   8  13  -1    6.18    0.66 
  -8 -13   1    7.71    0.72 
   7  13  -1   36.07    1.26 
  -7 -13   1   34.87    1.27 
   6  13  -1    1.52    0.45 
  -6 -13   1    1.70    0.45 
   5  13  -1   74.72    1.97 
  -5 -13   1   74.54    1.97 
   4  13  -1   -0.53    0.34 
  -4 -13   1    0.07    0.37 
   3  13  -1   33.20    1.25 
  -3 -13   1   31.67    1.22 
   2  13  -1    6.46    0.68 
  -2 -13   1    5.19    0.65 
  -1 -13   1   43.64    1.51 
   0 -13   1   20.78    1.08 
 -12 -12   1   22.95    1.14 
  11  12  -1    1.38    0.50 
 -11 -12   1    1.93    0.49 
  10  12  -1   49.70    1.59 
 -10 -12   1   52.07    1.60 
   9  12  -1   18.34    0.93 
  -9 -12   1   19.14    0.94 
   8  12  -1   23.72    1.01 
  -8 -12   1   22.52    0.98 
   7  12  -1   24.98    1.02 
  -7 -12   1   25.12    1.03 
   6  12  -1   17.09    0.83 
  -6 -12   1   17.91    0.87 
   5  12  -1   43.93    1.37 
   5  12  -1   44.35    1.32 
   4  12  -1   37.01    1.25 
  -4 -12   1   40.00    1.27 
   3  12  -1   47.87    1.45 
  -3 -12   1   49.23    1.47 
   2  12  -1    0.20    0.35 
  -2 -12   1    0.16    0.37 
   1  12  -1   36.52    1.26 
  -1 -12   1   35.06    1.28 
   0  12  -1    1.50    0.50 
   0  12  -1    0.99    0.42 
   0 -12   1    1.84    0.49 
  -1  12  -1   52.79    1.71 
  -2  12  -1    0.68    0.50 
  12  11  -1   39.84    1.44 
 -12 -11   1   42.02    1.48 
  11  11  -1    0.67    0.43 
 -11 -11   1    0.45    0.41 
  10  11  -1   19.70    0.95 
 -10 -11   1   19.67    0.96 
   9  11  -1    0.22    0.36 
  -9 -11   1    0.30    0.36 
   8  11  -1   66.13    1.74 
  -8 -11   1   67.09    1.78 
   7  11  -1    6.40    0.59 
  -7 -11   1    5.88    0.57 
   6  11  -1   12.38    0.69 
  -6 -11   1   11.14    0.66 
   5  11  -1   16.16    0.78 
   5  11  -1   16.57    0.78 
  -5 -11   1   16.74    0.76 
   4  11  -1   77.70    1.78 
   4  11  -1   75.43    1.87 
  -4 -11   1   78.09    1.85 
   3  11  -1   15.68    0.78 
  -3 -11   1   17.07    0.80 
   2  11  -1   29.94    1.06 
  -2 -11   1   29.75    1.08 
   1  11  -1   43.30    1.32 
   1  11  -1   41.55    1.36 
   0  11  -1    1.77    0.43 
   0  11  -1    2.18    0.46 
  -1  11  -1   46.36    1.51 
  -1  11  -1   48.64    1.48 
   1 -11   1   46.66    1.39 
  -2  11  -1   23.89    1.08 
  -2  11  -1   25.17    1.09 
   2 -11   1   24.22    1.03 
  -3  11  -1   26.38    1.20 
   3 -11   1   27.15    1.11 
   4 -11   1   -0.42    0.41 
  13  10  -1   26.12    1.16 
 -13 -10   1   26.41    1.21 
  12  10  -1   17.68    0.95 
 -12 -10   1   18.04    0.95 
  11  10  -1    3.73    0.55 
 -11 -10   1    4.31    0.56 
  10  10  -1   34.93    1.22 
 -10 -10   1   36.03    1.23 
   9  10  -1    1.27    0.36 
  -9 -10   1    1.12    0.38 
   8  10  -1   79.57    1.94 
  -8 -10   1   83.27    1.99 
   7  10  -1    9.07    0.58 
  -7 -10   1    9.03    0.61 
   6  10  -1  103.62    2.24 
  -6 -10   1  105.14    2.30 
   5  10  -1    3.98    0.44 
   5  10  -1    4.11    0.44 
  -5 -10   1    4.42    0.47 
  -5 -10   1    3.70    0.42 
   4  10  -1   84.44    1.95 
   4  10  -1   85.94    1.87 
  -4 -10   1   86.02    1.91 
   3  10  -1    3.17    0.42 
   3  10  -1    2.82    0.37 
  -3 -10   1    2.82    0.41 
   2  10  -1   90.70    2.05 
   2  10  -1   86.67    2.01 
  -2 -10   1   86.54    2.02 
  -2 -10   1   89.72    1.87 
   1  10  -1   15.83    0.76 
   1  10  -1   15.95    0.79 
  -1 -10   1   16.55    0.68 
   0  10  -1    8.40    0.61 
   0  10  -1    9.44    0.63 
   0 -10   1    9.42    0.58 
  -1  10  -1   17.36    0.84 
  -1  10  -1   18.24    0.88 
   1 -10   1   18.55    0.80 
  -2  10  -1   36.74    1.30 
  -2  10  -1   38.31    1.27 
   2 -10   1   37.97    1.21 
  -3  10  -1   16.15    0.88 
  -3  10  -1   17.98    0.92 
   3 -10   1   17.44    0.87 
  -4  10  -1   10.10    0.77 
  -4  10  -1    8.81    0.78 
   4 -10   1   10.00    0.79 
  -5  10  -1   30.55    1.29 
   5 -10   1   30.30    1.23 
  14   9  -1    6.52    0.70 
  13   9  -1   39.15    1.36 
 -13  -9   1   37.68    1.43 
  12   9  -1    3.75    0.52 
 -12  -9   1    3.43    0.53 
  11   9  -1   40.40    1.33 
 -11  -9   1   42.62    1.39 
  10   9  -1   24.84    0.99 
 -10  -9   1   26.00    1.04 
   9   9  -1   22.49    0.90 
  -9  -9   1   24.76    0.97 
   8   9  -1   46.91    1.33 
  -8  -9   1   46.21    1.32 
   7   9  -1   90.48    2.04 
  -7  -9   1   96.95    2.12 
   6   9  -1   55.04    1.25 
   6   9  -1   51.91    1.35 
  -6  -9   1   54.88    1.41 
   5   9  -1   15.86    0.60 
   5   9  -1   16.27    0.69 
  -5  -9   1   17.17    0.73 
  -5  -9   1   15.67    0.65 
   4   9  -1  122.50    2.28 
   4   9  -1  119.30    2.38 
   4   9  -1  121.22    2.47 
  -4  -9   1  120.30    2.40 
   3   9  -1    9.37    0.51 
   3   9  -1    9.39    0.56 
  -3  -9   1   11.37    0.52 
  -3  -9   1    9.58    0.55 
   2   9  -1   94.33    2.05 
   2   9  -1   96.23    1.90 
   2   9  -1   95.56    2.06 
  -2  -9   1   91.62    1.89 
   1   9  -1   11.41    0.61 
   1   9  -1   11.24    0.64 
  -1  -9   1   11.36    0.57 
   0   9  -1   80.44    1.86 
   0   9  -1   78.55    1.88 
   0  -9   1   79.59    1.74 
  -1   9  -1   14.98    0.78 
  -1   9  -1   15.99    0.75 
   1  -9   1   16.83    0.73 
  -2   9  -1   83.17    2.00 
  -2   9  -1   79.77    1.99 
   2  -9   1   81.97    1.89 
  -3   9  -1   10.88    0.72 
  -3   9  -1   10.76    0.72 
   3  -9   1   10.43    0.68 
  -4   9  -1   47.34    1.47 
  -4   9  -1   46.39    1.49 
   4  -9   1   45.81    1.42 
  -5   9  -1   12.43    0.83 
  -5   9  -1   11.22    0.82 
   5  -9   1   10.37    0.77 
  -6   9  -1    8.24    0.78 
  -6   9  -1    8.31    0.80 
   6  -9   1    8.39    0.80 
  14   8  -1    1.32    0.46 
 -14  -8   1    1.02    0.47 
  13   8  -1   48.52    1.49 
 -13  -8   1   44.39    1.55 
  12   8  -1    2.35    0.47 
 -12  -8   1    2.11    0.49 
  11   8  -1   66.26    1.72 
 -11  -8   1   66.14    1.79 
  10   8  -1    8.25    0.61 
 -10  -8   1    8.85    0.62 
   9   8  -1   88.86    2.08 
  -9  -8   1   97.67    2.17 
   8   8  -1   35.22    1.10 
   8   8  -1   38.57    1.04 
  -8  -8   1   38.16    1.15 
   7   8  -1  100.66    1.93 
   7   8  -1   93.79    2.05 
  -7  -8   1   92.46    2.08 
   6   8  -1   27.47    0.89 
   6   8  -1   30.82    0.82 
  -6  -8   1   28.39    0.91 
   5   8  -1  150.71    2.69 
   5   8  -1  148.98    2.83 
  -5  -8   1  151.54    2.90 
  -5  -8   1  148.57    2.75 
   4   8  -1   86.43    1.79 
   4   8  -1   86.20    1.69 
   4   8  -1   85.64    1.86 
  -4  -8   1   84.55    1.77 
   3   8  -1   25.48    0.82 
   3   8  -1   24.50    0.72 
   3   8  -1   24.18    0.76 
  -3  -8   1   26.09    0.80 
   2   8  -1  133.69    2.60 
   2   8  -1  137.02    2.46 
   2   8  -1  129.34    2.60 
  -2  -8   1  131.42    2.44 
   1   8  -1   69.63    1.41 
   1   8  -1   66.89    1.57 
   1   8  -1   69.64    1.61 
  -1  -8   1   69.62    1.47 
   0   8  -1   51.84    1.34 
   0   8  -1   54.13    1.39 
   0  -8   1   50.90    1.24 
  -1   8  -1   45.65    1.26 
   1  -8   1   45.48    1.19 
  -2   8  -1   93.21    2.11 
  -2   8  -1   94.17    2.10 
   2  -8   1   89.34    1.98 
  -3   8  -1    0.69    0.35 
  -3   8  -1    0.53    0.33 
   3  -8   1    0.07    0.30 
  -4   8  -1   64.48    1.75 
   4  -8   1   62.62    1.65 
  -5   8  -1    0.43    0.38 
  -5   8  -1    0.63    0.36 
   5  -8   1    0.41    0.39 
  -6   8  -1   46.99    1.50 
  -6   8  -1   48.26    1.56 
   6  -8   1   45.33    1.48 
  -7   8  -1   12.20    0.84 
  -7   8  -1   12.43    0.87 
   7  -8   1   12.09    0.86 
  -8   8  -1   12.07    0.88 
  14   7  -1   26.29    1.09 
 -14  -7   1   25.36    1.18 
  13   7  -1   30.13    1.13 
 -13  -7   1   31.19    1.26 
  12   7  -1   26.43    1.03 
 -12  -7   1   25.92    1.11 
  11   7  -1   76.76    1.86 
  11   7  -1   75.74    1.87 
 -11  -7   1   74.52    1.93 
  10   7  -1   36.47    1.14 
  10   7  -1   38.27    1.16 
 -10  -7   1   35.29    1.17 
   9   7  -1  115.85    2.35 
   9   7  -1  112.42    2.38 
  -9  -7   1  115.37    2.47 
   8   7  -1   17.22    0.71 
   8   7  -1   18.12    0.70 
  -8  -7   1   18.33    0.77 
   7   7  -1  236.46    4.00 
   7   7  -1  224.23    4.10 
  -7  -7   1  227.76    4.18 
   6   7  -1    7.56    0.41 
   6   7  -1    6.18    0.45 
  -6  -7   1    6.55    0.38 
  -6  -7   1    7.28    0.48 
   5   7  -1  178.48    3.27 
   5   7  -1  178.88    3.14 
  -5  -7   1  185.87    3.35 
  -5  -7   1  182.56    3.19 
   4   7  -1    2.07    0.29 
   4   7  -1    2.23    0.29 
   4   7  -1    1.56    0.22 
  -4  -7   1    2.46    0.28 
   3   7  -1  209.42    3.53 
   3   7  -1  207.70    3.72 
   3   7  -1  207.55    3.61 
  -3  -7   1  205.04    3.65 
   2   7  -1   33.73    0.90 
   2   7  -1   31.46    0.90 
   2   7  -1   31.94    0.82 
  -2  -7   1   32.72    0.81 
   1   7  -1   81.31    1.74 
   1   7  -1   80.18    1.73 
   1   7  -1   83.57    1.58 
  -1  -7   1   81.12    1.62 
   0   7  -1   11.69    0.42 
   0   7  -1   11.51    0.58 
   0   7  -1   11.64    0.56 
   0  -7   1   10.73    0.49 
  -1   7  -1  190.78    3.59 
  -1   7  -1  195.56    3.60 
   1  -7   1  193.82    3.46 
  -2   7  -1   55.12    1.42 
  -2   7  -1   56.17    1.42 
   2  -7   1   54.00    1.32 
  -3   7  -1    5.72    0.52 
  -3   7  -1    6.20    0.55 
   3  -7   1    6.25    0.52 
  -4   7  -1   74.01    1.84 
  -4   7  -1   73.01    1.79 
   4  -7   1   70.26    1.72 
  -5   7  -1   32.39    1.18 
  -5   7  -1   33.99    1.15 
   5  -7   1   32.39    1.13 
  -6   7  -1   65.49    1.73 
  -6   7  -1   62.56    1.81 
   6  -7   1   65.38    1.76 
  -7   7  -1    9.35    0.72 
  -7   7  -1    9.97    0.77 
   7  -7   1    8.42    0.75 
  -8   7  -1   36.86    1.30 
  -8   7  -1   35.37    1.40 
   8  -7   1   38.05    1.41 
  -9   7  -1    1.75    0.54 
  -9   7  -1    2.11    0.58 
 -14  -6   1   29.82    1.30 
  13   6  -1    0.19    0.36 
  13   6  -1    0.37    0.40 
 -13  -6   1    0.97    0.42 
  12   6  -1   52.30    1.47 
  12   6  -1   57.24    1.62 
 -12  -6   1   52.30    1.60 
  11   6  -1   26.54    0.97 
  11   6  -1   26.83    1.01 
 -11  -6   1   25.34    1.04 
  10   6  -1   93.86    2.09 
  10   6  -1   91.40    2.03 
 -10  -6   1   90.73    2.12 
   9   6  -1    5.49    0.48 
   9   6  -1    4.92    0.47 
  -9  -6   1    5.24    0.50 
   8   6  -1  130.42    2.50 
   8   6  -1  124.82    2.49 
  -8  -6   1  126.89    2.58 
   7   6  -1   78.60    1.70 
   7   6  -1   79.03    1.65 
  -7  -6   1   79.54    1.74 
   6   6  -1   21.73    0.73 
   6   6  -1   22.63    0.68 
  -6  -6   1   24.37    0.65 
  -6  -6   1   23.03    0.76 
   5   6  -1  209.46    3.56 
   5   6  -1  211.62    3.69 
  -5  -6   1  210.75    3.59 
  -5  -6   1  210.59    3.75 
   4   6  -1  122.72    2.15 
   4   6  -1  121.36    2.31 
   4   6  -1  118.95    2.24 
  -4  -6   1  123.36    2.32 
  -4  -6   1  119.42    2.20 
   3   6  -1  246.41    4.11 
   3   6  -1  254.59    4.33 
   3   6  -1  249.12    4.21 
  -3  -6   1  246.91    4.23 
   2   6  -1   27.05    0.75 
   2   6  -1   27.12    0.76 
   2   6  -1   26.51    0.69 
   2   6  -1   26.56    0.66 
   1   6  -1  321.08    5.31 
   1   6  -1  312.97    5.10 
   1   6  -1  310.67    5.31 
  -1  -6   1  302.70    5.11 
   0   6  -1    0.12    0.19 
   0   6  -1    0.10    0.17 
   0   6  -1    0.03    0.13 
   0  -6   1    0.17    0.17 
  -1   6  -1  200.75    3.61 
   1  -6   1  194.24    3.45 
  -2   6  -1   10.42    0.56 
  -2   6  -1   11.25    0.58 
   2  -6   1   10.57    0.53 
  -3   6  -1   86.88    1.92 
  -3   6  -1   89.02    1.97 
   3  -6   1   87.82    1.87 
  -4   6  -1   20.72    0.86 
  -4   6  -1   20.37    0.79 
   4  -6   1   22.22    0.83 
  -5   6  -1   76.12    1.88 
  -5   6  -1   73.46    1.78 
   5  -6   1   74.47    1.80 
  -6   6  -1   26.77    0.99 
  -6   6  -1   25.44    1.04 
   6  -6   1   25.63    1.01 
  -7   6  -1   48.23    1.51 
  -7   6  -1   46.12    1.40 
   7  -6   1   46.26    1.44 
  -8   6  -1   29.99    1.23 
  -8   6  -1   30.45    1.12 
   8  -6   1   31.99    1.26 
  -9   6  -1    8.39    0.82 
  -9   6  -1    8.25    0.73 
   9  -6   1    8.97    0.82 
 -10   6  -1   46.57    1.68 
  14   5  -1   27.60    1.23 
 -14  -5   1   30.10    1.31 
  13   5  -1   14.92    0.90 
 -13  -5   1   15.01    0.92 
  12   5  -1   53.61    1.56 
  12   5  -1   52.57    1.42 
 -12  -5   1   49.44    1.56 
  11   5  -1    1.19    0.33 
  11   5  -1    1.54    0.39 
 -11  -5   1    1.87    0.40 
  10   5  -1   73.52    1.70 
  10   5  -1   75.52    1.79 
 -10  -5   1   74.71    1.85 
   9   5  -1    0.36    0.26 
   9   5  -1    0.47    0.27 
  -9  -5   1   -0.18    0.27 
   8   5  -1   98.89    2.06 
   8   5  -1  102.28    2.05 
  -8  -5   1  100.16    2.12 
   7   5  -1    4.21    0.37 
   7   5  -1    4.21    0.37 
  -7  -5   1    3.73    0.36 
   6   5  -1  137.85    2.61 
   6   5  -1  140.29    2.56 
  -6  -5   1  143.97    2.68 
  -6  -5   1  144.25    2.44 
   5   5  -1   10.32    0.41 
   5   5  -1   10.98    0.45 
  -5  -5   1   11.58    0.40 
  -5  -5   1   11.13    0.47 
   4   5  -1  225.26    3.77 
   4   5  -1  230.09    3.88 
  -4  -5   1  229.94    3.95 
  -4  -5   1  226.82    3.82 
   3   5  -1   75.09    1.50 
   3   5  -1   73.37    1.36 
   3   5  -1   73.23    1.44 
  -3  -5   1   75.27    1.43 
   2   5  -1  420.91    6.86 
   2   5  -1  420.53    6.64 
   2   5  -1  409.62    6.80 
   2   5  -1  410.79    6.69 
  -2  -5   1  414.72    6.80 
   1   5  -1   86.58    1.54 
   1   5  -1   83.71    1.65 
  -1  -5   1   83.72    1.55 
   0   5  -1   65.29    1.19 
   0   5  -1   65.61    1.37 
   0   5  -1   63.39    1.36 
   0  -5   1   62.29    1.26 
  -1   5  -1  237.84    3.80 
  -1   5  -1  232.57    4.13 
  -1   5  -1  237.46    4.11 
   1  -5   1  235.53    3.99 
  -2   5  -1   30.63    0.90 
  -2   5  -1   30.98    0.87 
   2  -5   1   31.01    0.84 
  -3   5  -1  109.62    2.21 
  -3   5  -1  111.61    2.28 
   3  -5   1  110.33    2.18 
  -4   5  -1    3.79    0.40 
  -4   5  -1    3.90    0.43 
   4  -5   1    4.22    0.43 
  -5   5  -1  160.28    3.21 
  -5   5  -1  161.61    3.09 
   5  -5   1  158.48    3.10 
  -6   5  -1    0.46    0.30 
  -6   5  -1    0.41    0.31 
   6  -5   1    0.99    0.36 
  -7   5  -1   88.76    2.19 
  -7   5  -1   91.54    2.07 
   7  -5   1   90.71    2.16 
  -8   5  -1    1.12    0.38 
  -8   5  -1    0.30    0.39 
   8  -5   1    0.74    0.41 
  -9   5  -1   56.26    1.58 
  -9   5  -1   52.42    1.69 
   9  -5   1   52.32    1.66 
 -10   5  -1   13.87    0.96 
  10  -5   1   18.04    1.03 
  15   4  -1   31.27    1.42 
  14   4  -1   16.94    1.00 
 -14  -4   1   15.23    1.01 
  13   4  -1   30.70    1.23 
 -13  -4   1   30.27    1.23 
  12   4  -1    6.05    0.65 
  12   4  -1    5.15    0.50 
 -12  -4   1    5.95    0.62 
  11   4  -1   24.94    0.87 
  11   4  -1   24.15    0.97 
 -11  -4   1   24.58    0.99 
  10   4  -1   40.38    1.13 
  10   4  -1   43.43    1.26 
 -10  -4   1   43.19    1.30 
   9   4  -1   38.97    1.13 
   9   4  -1   39.93    1.06 
  -9  -4   1   39.13    1.18 
   8   4  -1   83.82    1.76 
   8   4  -1   84.72    1.82 
  -8  -4   1   85.87    1.88 
   7   4  -1   11.21    0.49 
   7   4  -1   12.37    0.54 
  -7  -4   1   13.46    0.59 
   6   4  -1   67.62    1.45 
   6   4  -1   72.49    1.46 
  -6  -4   1   70.24    1.51 
  -6  -4   1   70.50    1.27 
   5   4  -1   25.89    0.71 
   5   4  -1   25.51    0.68 
  -5  -4   1   26.22    0.73 
  -5  -4   1   26.48    0.60 
   4   4  -1  438.06    6.86 
   4   4  -1  413.98    6.93 
  -4  -4   1  436.91    6.91 
  -4  -4   1  423.76    7.05 
   3   4  -1   22.25    0.51 
   3   4  -1   20.86    0.57 
   3   4  -1   21.06    0.58 
  -3  -4   1   21.63    0.53 
   2   4  -1  179.89    2.90 
   2   4  -1  179.15    3.05 
   2   4  -1  172.48    2.96 
  -2  -4   1  174.65    2.99 
   1   4  -1    1.21    0.18 
   1   4  -1    1.38    0.15 
   1   4  -1    1.58    0.16 
   1   4  -1    1.31    0.18 
   0   4  -1  159.88    2.80 
   0   4  -1  158.93    2.81 
   0   4  -1  161.39    2.63 
   0  -4   1  159.50    2.70 
  -1   4  -1  188.38    3.30 
  -1   4  -1  186.41    3.32 
  -1   4  -1  191.01    3.04 
   1  -4   1  191.49    3.21 
  -2   4  -1   54.56    1.23 
  -2   4  -1   51.76    1.18 
   2  -4   1   53.24    1.15 
  -3   4  -1   25.68    0.77 
  -3   4  -1   26.13    0.81 
   3  -4   1   25.22    0.75 
  -4   4  -1  124.75    2.50 
  -4   4  -1  125.07    2.41 
   4  -4   1  122.65    2.41 
  -5   4  -1   68.12    1.66 
  -5   4  -1   70.31    1.58 
   5  -4   1   71.81    1.63 
  -6   4  -1   18.31    0.81 
  -6   4  -1   17.61    0.72 
   6  -4   1   17.75    0.76 
  -7   4  -1   59.73    1.63 
  -7   4  -1   59.41    1.49 
   7  -4   1   61.00    1.61 
  -8   4  -1   23.88    1.01 
  -8   4  -1   23.46    0.88 
   8  -4   1   22.52    0.99 
  -9   4  -1   37.14    1.32 
  -9   4  -1   38.68    1.20 
   9  -4   1   37.88    1.35 
 -10   4  -1    0.91    0.46 
  10  -4   1    0.71    0.48 
 -11   4  -1   51.43    1.76 
  14   3  -1    0.56    0.50 
 -14  -3   1    0.95    0.53 
  13   3  -1   55.58    1.72 
 -13  -3   1   55.62    1.73 
  12   3  -1    1.14    0.43 
 -12  -3   1    0.45    0.37 
  11   3  -1   44.58    1.17 
  11   3  -1   40.86    1.32 
 -11  -3   1   43.02    1.37 
  10   3  -1    4.21    0.49 
  10   3  -1    4.68    0.41 
 -10  -3   1    4.55    0.51 
   9   3  -1   65.97    1.45 
   9   3  -1   64.04    1.56 
  -9  -3   1   63.28    1.60 
   8   3  -1  102.04    2.01 
   8   3  -1  105.14    2.13 
  -8  -3   1  102.98    2.16 
   7   3  -1   38.49    1.01 
   7   3  -1   38.42    0.95 
  -7  -3   1   39.10    0.79 
  -7  -3   1   37.63    1.03 
   6   3  -1   78.37    1.59 
   6   3  -1   77.28    1.55 
  -6  -3   1   81.31    1.41 
  -6  -3   1   80.77    1.66 
   5   3  -1  131.99    2.38 
   5   3  -1  134.60    2.38 
  -5  -3   1  138.19    2.25 
  -5  -3   1  130.56    2.44 
   4   3  -1  198.62    3.45 
   4   3  -1  208.96    3.43 
  -4  -3   1  206.89    3.53 
  -4  -3   1  210.39    3.39 
   3   3  -1    2.01    0.17 
   3   3  -1    1.37    0.16 
  -3  -3   1    1.50    0.19 
  -3  -3   1    1.92    0.17 
   2   3  -1  282.35    4.62 
   2   3  -1  278.48    4.45 
   2   3  -1  278.14    4.52 
  -2  -3   1  280.57    4.55 
   1   3  -1   45.25    0.90 
   1   3  -1   43.51    0.91 
   1   3  -1   44.57    0.83 
   1   3  -1   46.71    0.86 
   0   3  -1  156.00    2.52 
   0   3  -1  155.47    2.68 
   0   3  -1  156.82    2.67 
   0  -3   1  154.02    2.57 
  -1   3  -1    1.79    0.20 
  -1   3  -1    1.99    0.12 
  -1   3  -1    3.14    0.25 
   1  -3   1    1.85    0.19 
  -2   3  -1  192.46    3.33 
  -2   3  -1  195.53    3.39 
   2  -3   1  190.59    3.28 
  -3   3  -1  103.57    2.01 
  -3   3  -1  101.19    1.93 
   3  -3   1  100.04    1.93 
  -4   3  -1  139.20    2.61 
  -4   3  -1  143.90    2.71 
   4  -3   1  142.73    2.64 
  -5   3  -1    2.02    0.29 
  -5   3  -1    1.18    0.30 
   5  -3   1    1.37    0.29 
  -6   3  -1   67.50    1.62 
  -6   3  -1   66.39    1.49 
   6  -3   1   65.77    1.58 
  -7   3  -1   54.96    1.49 
  -7   3  -1   54.75    1.35 
   7  -3   1   55.90    1.49 
  -8   3  -1   22.63    0.83 
  -8   3  -1   21.52    0.92 
   8  -3   1   21.62    0.91 
  -9   3  -1   10.16    0.60 
  -9   3  -1    9.97    0.73 
   9  -3   1   10.24    0.72 
 -10   3  -1   24.85    1.11 
  10  -3   1   23.26    1.06 
 -11   3  -1   14.63    0.95 
  11  -3   1   14.40    0.91 
 -12   3  -1    5.70    0.77 
  14   2  -1    6.81    0.79 
 -14  -2   1    5.17    0.74 
  13   2  -1   50.34    1.65 
 -13  -2   1   51.33    1.69 
  12   2  -1    2.85    0.53 
 -12  -2   1    2.87    0.54 
  11   2  -1   69.98    1.84 
 -11  -2   1   67.74    1.82 
  10   2  -1    3.68    0.37 
  10   2  -1    3.87    0.50 
 -10  -2   1    3.97    0.49 
   9   2  -1   78.18    1.80 
   9   2  -1   75.79    1.59 
  -9  -2   1   75.83    1.82 
   8   2  -1    3.72    0.39 
   8   2  -1    3.27    0.31 
  -8  -2   1    3.68    0.42 
   7   2  -1  152.78    2.82 
   7   2  -1  150.70    2.69 
  -7  -2   1  149.46    2.87 
  -7  -2   1  152.84    2.59 
   6   2  -1    7.91    0.42 
   6   2  -1    7.71    0.36 
  -6  -2   1    7.34    0.29 
  -6  -2   1    7.21    0.43 
   5   2  -1   74.22    1.48 
   5   2  -1   74.94    1.44 
  -5  -2   1   77.91    1.53 
  -5  -2   1   76.41    1.34 
   4   2  -1   30.21    0.68 
   4   2  -1   29.79    0.69 
  -4  -2   1   30.84    0.61 
  -4  -2   1   28.45    0.71 
   3   2  -1    4.32    0.22 
   3   2  -1    4.14    0.22 
  -3  -2   1    3.97    0.20 
  -3  -2   1    3.73    0.22 
   2   2  -1  219.87    3.55 
   2   2  -1  218.71    3.61 
  -2  -2   1  226.08    3.62 
  -2  -2   1  227.60    3.68 
   1   2  -1  178.54    2.91 
   1   2  -1  182.35    2.99 
   1   2  -1  181.38    2.86 
  -1  -2   1  180.87    2.96 
   0   2  -1  127.71    2.01 
   0   2  -1  124.28    2.11 
   0   2  -1  120.26    2.12 
   0  -2   1  127.05    2.04 
  -1   2  -1    1.95    0.17 
  -1   2  -1    1.98    0.08 
  -1   2  -1    1.90    0.19 
   1  -2   1    1.86    0.16 
  -2   2  -1  285.45    4.75 
  -2   2  -1  284.86    4.68 
   2  -2   1  281.73    4.63 
  -3   2  -1    0.18    0.14 
  -3   2  -1    1.08    0.21 
   3  -2   1    0.06    0.16 
  -4   2  -1  450.96    7.46 
  -4   2  -1  459.59    7.61 
   4  -2   1  459.28    7.46 
  -5   2  -1   28.06    0.76 
  -5   2  -1   27.74    0.86 
  -6   2  -1   84.20    1.89 
  -6   2  -1   86.60    1.74 
   6  -2   1   84.44    1.86 
  -7   2  -1   11.12    0.52 
  -7   2  -1   10.19    0.61 
   7  -2   1   10.91    0.64 
  -8   2  -1   56.01    1.33 
  -8   2  -1   54.22    1.52 
   8  -2   1   54.03    1.50 
  -9   2  -1    8.32    0.63 
   9  -2   1    8.80    0.71 
 -10   2  -1   26.29    1.12 
  10  -2   1   28.36    1.12 
 -11   2  -1    4.15    0.61 
  11  -2   1    3.36    0.60 
 -12   2  -1   18.73    1.09 
  12  -2   1   18.55    1.03 
  13   1  -1    8.36    0.82 
 -13  -1   1    9.71    0.85 
  12   1  -1   23.68    1.10 
 -12  -1   1   23.33    1.10 
  11   1  -1   88.83    2.18 
 -11  -1   1   88.30    2.22 
  10   1  -1   36.18    1.21 
 -10  -1   1   38.70    1.24 
   9   1  -1   48.53    1.35 
   9   1  -1   47.10    1.09 
  -9  -1   1   46.71    1.33 
   8   1  -1    4.21    0.45 
   8   1  -1    4.24    0.33 
  -8  -1   1    3.83    0.44 
  -8  -1   1    5.06    0.34 
   7   1  -1  107.32    1.98 
   7   1  -1  107.47    2.16 
  -7  -1   1  108.79    2.20 
  -7  -1   1  108.41    1.95 
   6   1  -1    3.42    0.26 
   6   1  -1    3.35    0.33 
  -6  -1   1    3.25    0.24 
  -6  -1   1    3.86    0.35 
   5   1  -1  359.20    5.85 
   5   1  -1  353.54    5.75 
  -5  -1   1  356.20    5.75 
  -5  -1   1  353.63    5.94 
   4   1  -1    1.81    0.20 
   4   1  -1    2.24    0.18 
  -4  -1   1    2.34    0.22 
  -4  -1   1    2.45    0.18 
   3   1  -1   28.58    0.61 
   3   1  -1   28.37    0.62 
  -3  -1   1   28.12    0.64 
  -3  -1   1   28.72    0.57 
   2   1  -1   39.13    0.74 
   2   1  -1   38.19    0.71 
  -2  -1   1   39.50    0.71 
  -2  -1   1   39.83    0.76 
   1   1  -1  381.09    6.03 
   1   1  -1  377.82    6.23 
   1   1  -1  385.05    6.35 
  -1  -1   1  387.27    6.08 
   0   1  -1   37.21    0.69 
   0   1  -1   37.60    0.63 
   0  -1   1   37.18    0.68 
   0  -1   1   38.86    0.64 
  -1   1  -1  632.02   10.05 
  -1   1  -1  643.95   10.28 
   1  -1   1  613.31   10.00 
  -2   1  -1    4.27    0.26 
  -2   1  -1    3.62    0.20 
   2  -1   1    3.36    0.21 
   2  -1   1    3.74    0.10 
  -3   1  -1   64.49    1.21 
  -3   1  -1   62.73    1.29 
   3  -1   1   64.18    1.26 
   3  -1   1   64.55    1.06 
  -4   1  -1  641.53   10.78 
  -4   1  -1  662.14   10.62 
   4  -1   1  673.73   10.36 
   4  -1   1  674.26   10.60 
  -5   1  -1   22.99    0.73 
  -5   1  -1   23.34    0.62 
   5  -1   1   22.52    0.49 
   5  -1   1   22.05    0.72 
  -6   1  -1  133.19    2.42 
  -6   1  -1  130.49    2.61 
   6  -1   1  135.25    2.24 
   6  -1   1  133.00    2.57 
  -7   1  -1   10.24    0.47 
  -7   1  -1   10.43    0.62 
   7  -1   1   10.13    0.57 
  -8   1  -1  102.88    2.33 
  -8   1  -1  111.31    2.11 
   8  -1   1  106.85    2.33 
  -9   1  -1    0.08    0.31 
   9  -1   1    0.18    0.35 
 -10   1  -1   89.07    2.22 
  10  -1   1   88.41    2.18 
 -11   1  -1   -0.33    0.36 
  11  -1   1   -0.78    0.35 
 -12   1  -1   15.34    0.99 
  12  -1   1   18.49    1.04 
  13   0  -1    1.48    0.54 
 -13   0   1    1.15    0.55 
  12   0  -1   15.06    0.88 
 -12   0   1   15.40    0.95 
  11   0  -1   10.30    0.76 
 -11   0   1   10.24    0.76 
  10   0  -1  123.56    2.75 
 -10   0   1  131.94    2.82 
   9   0  -1   20.16    0.86 
  -9   0   1   18.11    0.81 
   8   0  -1   90.20    1.98 
  -8   0   1   89.29    2.00 
  -8   0   1   88.75    1.75 
   7   0  -1   36.47    1.04 
   7   0  -1   37.10    0.83 
  -7   0   1   35.59    0.87 
  -7   0   1   37.08    1.05 
   6   0  -1   96.61    1.74 
   6   0  -1   96.40    1.94 
  -6   0   1   95.75    1.96 
  -6   0   1   97.18    1.79 
   5   0  -1  246.59    4.03 
   5   0  -1  251.95    4.20 
  -5   0   1  242.96    4.09 
  -5   0   1  244.99    4.25 
   4   0  -1   36.57    0.85 
   4   0  -1   37.80    0.75 
  -4   0   1   37.41    0.77 
  -4   0   1   38.26    0.87 
   3   0  -1  378.51    6.00 
   3   0  -1  384.06    6.07 
  -3   0   1  375.51    6.17 
  -3   0   1  376.95    6.08 
   2   0  -1    3.95    0.16 
   2   0  -1    3.81    0.19 
  -2   0   1    3.94    0.19 
  -2   0   1    3.67    0.17 
   1   0  -1  791.32   12.58 
   1   0  -1  801.80   12.47 
  -1   0   1  790.35   12.71 
  -1   0   1  767.94   12.71 
  -1   0  -1  487.04    7.97 
  -1   0  -1  474.29    7.65 
  -1   0  -1  481.20    7.79 
   1   0   1  489.97    7.75 
  -2   0  -1   90.17    1.49 
  -2   0  -1   85.99    1.57 
   2   0   1   89.30    1.54 
   2   0   1   90.11    1.46 
  -3   0  -1  221.75    3.56 
  -3   0  -1  216.80    3.68 
   3   0   1  214.59    3.61 
   3   0   1  219.67    3.49 
  -4   0  -1   62.05    1.27 
  -4   0  -1   61.16    1.13 
   4   0   1   60.67    1.09 
   4   0   1   60.08    1.24 
  -5   0  -1  240.93    4.00 
  -5   0  -1  242.83    4.20 
   5   0   1  242.55    3.91 
   5   0   1  237.30    4.12 
  -6   0  -1  107.09    2.15 
  -6   0  -1  106.89    1.94 
   6   0   1  109.76    2.15 
   6   0   1  105.83    1.87 
  -7   0  -1   61.69    1.50 
  -7   0  -1   62.68    1.28 
   7   0   1   64.58    1.23 
   7   0   1   61.50    1.48 
  -8   0  -1   18.34    0.60 
  -8   0  -1   18.81    0.81 
   8   0   1   19.23    0.81 
  -9   0  -1   82.50    2.01 
   9   0   1   83.63    1.99 
 -10   0  -1   88.02    2.14 
  10   0   1   83.53    2.08 
 -11   0  -1    1.01    0.46 
  11   0   1    1.65    0.47 
 -12   0  -1   26.80    1.22 
  12   0   1   26.93    1.20 
 -13   0  -1    0.40    0.49 
  13   0   1   -0.57    0.46 
 -13   1   1    7.63    0.83 
  12  -1  -1   19.27    1.05 
 -12   1   1   16.74    1.00 
  11  -1  -1    2.85    0.51 
 -11   1   1    1.90    0.49 
  10  -1  -1  105.97    2.47 
 -10   1   1  107.50    2.50 
   9  -1  -1    4.38    0.53 
  -9   1   1    5.59    0.56 
   8  -1  -1  183.10    3.56 
  -8   1   1  189.71    3.37 
  -8   1   1  188.87    3.61 
   7  -1  -1    0.80    0.30 
  -7   1   1    0.71    0.22 
  -7   1   1    0.90    0.30 
   6  -1  -1   95.60    1.95 
   6  -1  -1   96.03    1.68 
  -6   1   1   94.03    1.96 
  -6   1   1   94.87    1.82 
   5  -1  -1   60.83    1.12 
   5  -1  -1   61.17    1.34 
  -5   1   1   58.07    1.22 
  -5   1   1   61.88    1.34 
   4  -1  -1  327.41    5.16 
   4  -1  -1  329.33    5.35 
  -4   1   1  321.14    5.32 
  -4   1   1  317.97    5.42 
   3  -1  -1  217.04    3.43 
   3  -1  -1  217.38    3.57 
  -3   1   1  209.78    3.60 
  -3   1   1  211.21    3.55 
   2  -1  -1  222.01    3.54 
   2  -1  -1  219.84    3.45 
  -2   1   1  209.51    3.57 
  -2   1   1  216.04    3.55 
   1  -1  -1  438.89    6.82 
   1  -1  -1  432.94    6.79 
  -1   1   1  410.45    6.79 
  -1   1   1  424.85    6.84 
   0   1   1  120.00    1.88 
   0   1   1  115.52    1.90 
   0   1   1  116.71    1.89 
  -1  -1  -1  682.27   10.66 
   1   1   1  659.97   10.63 
   1   1   1  633.48   10.49 
   1   1   1  665.80   10.45 
  -2  -1  -1   37.64    0.62 
  -2  -1  -1   37.43    0.73 
   2   1   1   37.33    0.73 
   2   1   1   37.66    0.69 
  -3  -1  -1  235.04    3.89 
  -3  -1  -1  233.16    3.72 
   3   1   1  231.47    3.76 
  -4  -1  -1    1.10    0.20 
  -4  -1  -1    1.31    0.12 
   4   1   1    1.13    0.14 
   4   1   1    1.18    0.19 
  -5  -1  -1  171.55    3.15 
  -5  -1  -1  178.53    2.94 
   5   1   1  182.62    3.13 
   5   1   1  178.21    2.97 
  -6  -1  -1    5.63    0.27 
  -6  -1  -1    5.87    0.40 
   6   1   1    6.05    0.40 
   6   1   1    6.38    0.30 
  -7  -1  -1  254.07    4.48 
  -7  -1  -1  249.60    4.15 
   7   1   1  245.88    4.39 
   7   1   1  248.33    4.15 
  -8  -1  -1   11.04    0.60 
   8   1   1   10.02    0.43 
   8   1   1    9.47    0.60 
  -9  -1  -1  127.98    2.67 
   9   1   1  122.75    2.62 
 -10  -1  -1   22.90    0.96 
  10   1   1   22.77    0.97 
 -11  -1  -1   38.37    1.34 
  11   1   1   36.92    1.31 
 -12  -1  -1   23.98    1.12 
  12   1   1   24.19    1.12 
 -13  -1  -1   18.01    1.07 
  13   1   1   16.16    1.01 
  12  -2  -1   20.08    1.06 
 -12   2   1   18.62    1.06 
  11  -2  -1   10.68    0.81 
 -11   2   1   12.98    0.86 
  10  -2  -1   26.14    1.08 
 -10   2   1   26.91    1.11 
   9  -2  -1   25.40    0.98 
  -9   2   1   22.05    0.80 
  -9   2   1   22.28    0.96 
   8  -2  -1  127.85    2.68 
  -8   2   1  129.12    2.50 
  -8   2   1  125.29    2.69 
   7  -2  -1   40.92    1.18 
  -7   2   1   40.06    1.04 
  -7   2   1   38.36    1.16 
  -6   2   1  110.00    2.11 
  -6   2   1  108.84    2.24 
   5  -2  -1   20.16    0.46 
   5  -2  -1   19.35    0.67 
  -5   2   1   20.31    0.62 
  -5   2   1   19.27    0.68 
   4  -2  -1  222.19    3.52 
   4  -2  -1  220.85    3.78 
  -4   2   1  215.45    3.81 
  -4   2   1  219.01    3.75 
   3  -2  -1   12.60    0.45 
   3  -2  -1   13.44    0.32 
  -3   2   1   13.01    0.45 
  -3   2   1   12.34    0.42 
   2  -2  -1  518.54    8.00 
   2  -2  -1  514.68    8.12 
  -2   2   1  507.00    8.21 
  -2   2   1  501.85    8.24 
   1  -2  -1    6.80    0.26 
   1  -2  -1    7.17    0.21 
  -1   2   1    7.25    0.25 
  -1   2   1    6.88    0.27 
   0  -2  -1  482.34    7.82 
   0   2   1  473.60    7.93 
   0   2   1  498.65    7.96 
   0   2   1  494.76    7.76 
   1   2   1  101.85    1.72 
   1   2   1  104.40    1.73 
   1   2   1  104.77    1.71 
   1   2   1  103.96    1.73 
  -2  -2  -1    4.40    0.18 
   2   2   1    5.61    0.23 
   2   2   1    4.65    0.12 
   2   2   1    4.46    0.20 
  -3  -2  -1   35.38    0.74 
   3   2   1   33.90    0.74 
   3   2   1   34.44    0.71 
  -4  -2  -1  176.29    2.78 
  -4  -2  -1  175.47    3.03 
   4   2   1  172.10    2.98 
   4   2   1  174.87    2.92 
  -5  -2  -1   92.13    1.53 
  -5  -2  -1   91.23    1.78 
   5   2   1   92.94    1.67 
   5   2   1   89.73    1.75 
  -6  -2  -1   95.24    1.61 
  -6  -2  -1   92.78    1.89 
   6   2   1   94.16    1.74 
   6   2   1   94.06    1.87 
  -7  -2  -1  349.05    5.65 
  -7  -2  -1  350.61    6.02 
   7   2   1  351.53    5.93 
   7   2   1  346.93    5.74 
  -8  -2  -1   22.26    0.82 
   8   2   1   23.15    0.83 
   8   2   1   22.55    0.67 
  -9  -2  -1  134.74    2.86 
   9   2   1  145.82    2.60 
   9   2   1  140.85    2.85 
 -10  -2  -1    9.15    0.63 
  10   2   1    9.27    0.63 
 -11  -2  -1   56.25    1.63 
  11   2   1   55.98    1.63 
 -12  -2  -1    0.83    0.45 
  12   2   1    0.72    0.43 
 -13  -2  -1   68.22    2.01 
  13   2   1   67.92    2.00 
  14   2   1    5.57    0.72 
 -12   3   1    1.13    0.54 
  11  -3  -1   61.27    1.87 
 -11   3   1   67.08    1.95 
  10  -3  -1   14.23    0.84 
 -10   3   1   15.98    0.90 
   9  -3  -1   20.17    0.95 
  -9   3   1   21.01    0.82 
  -9   3   1   20.94    0.95 
   8  -3  -1   21.79    0.91 
  -8   3   1   23.10    0.82 
  -8   3   1   24.51    0.96 
   7  -3  -1   92.14    2.09 
  -7   3   1   96.82    2.00 
  -7   3   1   94.99    2.12 
   6  -3  -1   31.93    0.99 
  -6   3   1   31.76    0.92 
  -6   3   1   34.88    1.03 
   5  -3  -1   35.26    1.00 
  -5   3   1   36.35    0.94 
  -5   3   1   35.01    0.99 
   4  -3  -1   82.13    1.68 
   4  -3  -1   81.75    1.36 
  -4   3   1   80.41    1.68 
  -4   3   1   80.55    1.64 
   3  -3  -1   55.76    1.20 
   3  -3  -1   56.77    0.97 
  -3   3   1   57.16    1.22 
  -3   3   1   54.69    1.19 
   2  -3  -1  169.40    2.96 
   2  -3  -1  174.38    2.80 
  -2   3   1  169.19    2.99 
  -2   3   1  178.26    3.00 
   1  -3  -1   17.26    0.48 
   1  -3  -1   16.86    0.39 
  -1   3   1   17.99    0.48 
  -1   3   1   16.80    0.48 
   0  -3  -1  204.33    3.37 
   0   3   1  213.17    3.47 
   0   3   1  208.83    3.42 
   0   3   1  208.91    3.44 
   1   3   1    2.93    0.19 
   1   3   1    2.92    0.19 
   1   3   1    2.70    0.19 
   1   3   1    2.61    0.18 
  -2  -3  -1  292.46    4.77 
   2   3   1  294.92    4.69 
   2   3   1  291.11    4.70 
   2   3   1  290.71    4.72 
  -3  -3  -1   89.02    1.64 
  -3  -3  -1   90.49    1.49 
   3   3   1   91.17    1.64 
   3   3   1   90.95    1.63 
  -4  -3  -1  633.64   10.29 
   4   3   1  631.26   10.12 
   4   3   1  646.39   10.14 
  -5  -3  -1   21.63    0.62 
   5   3   1   21.46    0.64 
   5   3   1   20.56    0.57 
  -6  -3  -1  125.97    2.37 
  -6  -3  -1  123.52    2.01 
   6   3   1  122.12    2.24 
  -7  -3  -1   40.72    1.08 
   7   3   1   42.07    1.08 
   7   3   1   39.71    0.97 
  -8  -3  -1  123.72    2.48 
   8   3   1  119.46    2.27 
   8   3   1  120.14    2.44 
  -9  -3  -1   91.43    2.07 
   9   3   1   93.12    1.86 
   9   3   1   91.34    2.05 
 -10  -3  -1   24.79    0.99 
  10   3   1   24.53    0.97 
  10   3   1   26.28    0.83 
 -11  -3  -1   15.27    0.81 
  11   3   1   16.56    0.86 
 -12  -3  -1   14.30    0.84 
  12   3   1   14.50    0.83 
 -13  -3  -1   81.00    2.23 
  13   3   1   85.59    2.25 
 -14  -3  -1    1.24    0.58 
  14   3   1    1.17    0.55 
  11  -4  -1   39.09    1.48 
 -11   4   1   39.05    1.47 
  10  -4  -1    1.78    0.52 
 -10   4   1    1.49    0.49 
   9  -4  -1   25.99    1.10 
  -9   4   1   26.86    1.11 
  -9   4   1   26.48    0.98 
   8  -4  -1    6.89    0.62 
  -8   4   1    6.40    0.61 
  -8   4   1    7.82    0.56 
   7  -4  -1   94.72    2.19 
  -7   4   1   96.70    2.19 
  -7   4   1   96.71    2.07 
   6  -4  -1    2.53    0.39 
  -6   4   1    2.06    0.34 
  -6   4   1    2.47    0.38 
   5  -4  -1  168.21    3.18 
  -5   4   1  168.64    3.15 
  -5   4   1  171.69    3.23 
   4  -4  -1   14.89    0.59 
  -4   4   1   13.59    0.60 
  -4   4   1   12.48    0.55 
   3  -4  -1   56.14    1.27 
   3  -4  -1   60.13    1.02 
  -3   4   1   59.18    1.30 
  -3   4   1   56.38    1.28 
   2  -4  -1   32.48    0.64 
   2  -4  -1   30.78    0.79 
  -2   4   1   31.24    0.80 
  -2   4   1   29.79    0.79 
   1  -4  -1  262.69    4.34 
   1  -4  -1  261.07    4.20 
  -1   4   1  256.80    4.41 
  -1   4   1  267.21    4.40 
   0  -4  -1   67.20    1.22 
   0  -4  -1   66.61    1.29 
   0   4   1   67.88    1.32 
   0   4   1   68.68    1.29 
   1   4   1   16.19    0.46 
   1   4   1   16.24    0.45 
   1   4   1   16.15    0.44 
   1   4   1   16.88    0.44 
   2   4   1  204.18    3.40 
   2   4   1  205.98    3.38 
   2   4   1  204.45    3.38 
   2   4   1  202.47    3.42 
  -3  -4  -1   75.49    1.42 
   3   4   1   74.91    1.42 
   3   4   1   73.44    1.31 
   3   4   1   75.71    1.41 
  -4  -4  -1  494.83    8.01 
  -4  -4  -1  488.98    7.78 
   4   4   1  488.68    7.89 
   4   4   1  488.74    7.89 
  -5  -4  -1    0.02    0.16 
   5   4   1    0.31    0.18 
   5   4   1    0.03    0.14 
  -6  -4  -1   61.01    1.35 
   6   4   1   61.26    1.36 
   6   4   1   61.66    1.30 
  -7  -4  -1    5.78    0.41 
   7   4   1    5.66    0.43 
   7   4   1    6.07    0.39 
  -8  -4  -1   82.21    1.81 
   8   4   1   79.92    1.68 
   8   4   1   81.42    1.80 
  -9  -4  -1    1.35    0.35 
   9   4   1    1.18    0.28 
   9   4   1    1.18    0.33 
 -10  -4  -1   91.23    2.15 
  10   4   1   91.73    2.13 
  10   4   1   96.47    1.97 
 -11  -4  -1    4.61    0.53 
  11   4   1    5.02    0.57 
  11   4   1    4.68    0.45 
 -12  -4  -1   28.06    1.16 
  12   4   1   30.10    1.17 
 -13  -4  -1   25.20    1.16 
  13   4   1   24.17    1.13 
 -14  -4  -1   29.56    1.32 
  14   4   1   30.56    1.33 
  10  -5  -1   34.61    1.39 
 -10   5   1   34.77    1.37 
   9  -5  -1   32.43    1.29 
  -9   5   1   34.50    1.29 
  -9   5   1   33.46    1.17 
   8  -5  -1    3.76    0.56 
  -8   5   1    4.75    0.58 
  -8   5   1    3.70    0.49 
   7  -5  -1   55.12    1.54 
  -7   5   1   53.76    1.53 
  -7   5   1   56.57    1.48 
   6  -5  -1   11.41    0.69 
  -6   5   1   13.50    0.71 
  -6   5   1   11.12    0.63 
   5  -5  -1  137.21    2.77 
  -5   5   1  139.00    2.75 
  -5   5   1  143.75    2.83 
   4  -5  -1    0.55    0.26 
  -4   5   1    0.81    0.27 
  -4   5   1    0.67    0.26 
   3  -5  -1   76.75    1.65 
  -3   5   1   81.97    1.71 
  -3   5   1   76.41    1.67 
   2  -5  -1    5.07    0.25 
   2  -5  -1    5.45    0.38 
  -2   5   1    4.89    0.38 
  -2   5   1    4.79    0.35 
   1  -5  -1  124.54    2.27 
   1  -5  -1  124.14    2.10 
  -1   5   1  121.02    2.31 
  -1   5   1  125.02    2.29 
   0  -5  -1   14.88    0.49 
   0  -5  -1   14.43    0.42 
   0   5   1   14.41    0.47 
   0   5   1   14.75    0.51 
   1   5   1  266.02    4.45 
   1   5   1  266.09    4.47 
   1   5   1  268.45    4.36 
   1   5   1  263.83    4.40 
   2   5   1   36.93    0.83 
   2   5   1   37.18    0.82 
   2   5   1   36.86    0.83 
   2   5   1   37.73    0.83 
  -3  -5  -1  142.07    2.51 
   3   5   1  140.66    2.43 
   3   5   1  141.57    2.49 
   3   5   1  141.99    2.47 
  -4  -5  -1  234.11    4.00 
  -4  -5  -1  233.14    3.83 
   4   5   1  235.28    3.93 
   4   5   1  232.49    3.96 
  -5  -5  -1   16.40    0.55 
  -5  -5  -1   17.65    0.42 
   5   5   1   17.10    0.58 
   5   5   1   16.52    0.57 
  -6  -5  -1   52.25    1.22 
   6   5   1   54.82    1.22 
   6   5   1   53.89    1.24 
  -7  -5  -1    7.54    0.45 
   7   5   1    7.57    0.43 
   7   5   1    8.65    0.52 
  -8  -5  -1   41.42    1.15 
   8   5   1   43.00    1.09 
   8   5   1   40.85    1.15 
  -9  -5  -1    0.57    0.29 
   9   5   1    0.72    0.30 
   9   5   1    0.67    0.26 
 -10  -5  -1  115.24    2.51 
  10   5   1  114.89    2.33 
  10   5   1  113.54    2.47 
 -11  -5  -1   -0.34    0.32 
  11   5   1   -0.15    0.26 
  11   5   1   -0.55    0.29 
 -12  -5  -1   43.86    1.44 
  12   5   1   45.34    1.27 
  12   5   1   43.64    1.43 
 -13  -5  -1    1.84    0.48 
  13   5   1    1.58    0.50 
 -14  -5  -1   24.32    1.19 
  14   5   1   24.33    1.20 
  15   5   1    1.55    0.59 
 -10   6   1   25.63    1.12 
   9  -6  -1    0.52    0.49 
  -9   6   1    0.55    0.45 
  -9   6   1    1.06    0.45 
   8  -6  -1   42.27    1.44 
  -8   6   1   41.92    1.43 
  -8   6   1   42.33    1.34 
   7  -6  -1   39.85    1.32 
  -7   6   1   41.32    1.35 
  -7   6   1   41.98    1.30 
   6  -6  -1    9.46    0.67 
  -6   6   1    9.02    0.62 
  -6   6   1   10.62    0.66 
   5  -6  -1   70.84    1.72 
  -5   6   1   70.56    1.70 
  -5   6   1   71.50    1.76 
   4  -6  -1   37.51    1.10 
  -4   6   1   37.98    1.12 
  -4   6   1   35.78    1.07 
   3  -6  -1   63.82    1.50 
  -3   6   1   67.34    1.55 
  -3   6   1   65.41    1.54 
   2  -6  -1    1.28    0.27 
  -2   6   1    1.04    0.27 
  -2   6   1    1.13    0.25 
   1  -6  -1  140.97    2.64 
   1  -6  -1  144.08    2.45 
  -1   6   1  146.01    2.72 
  -1   6   1  145.24    2.67 
   0  -6  -1    0.50    0.15 
   0  -6  -1    0.21    0.17 
   0   6   1    0.67    0.18 
   0   6   1    0.26    0.20 
   1   6   1  300.72    5.05 
   1   6   1  295.69    5.07 
   1   6   1  301.36    4.98 
   1   6   1  302.31    4.93 
   2   6   1    1.46    0.22 
   2   6   1    2.04    0.23 
   2   6   1    1.44    0.21 
   2   6   1    1.50    0.21 
   3   6   1  104.89    1.95 
   3   6   1  102.80    1.90 
   3   6   1  104.63    1.93 
   3   6   1  102.16    1.96 
  -4  -6  -1   16.71    0.48 
  -4  -6  -1   17.58    0.57 
   4   6   1   15.92    0.55 
   4   6   1   16.20    0.54 
  -5  -6  -1   35.19    0.75 
  -5  -6  -1   34.54    0.91 
   5   6   1   35.15    0.89 
   5   6   1   35.21    0.91 
  -6  -6  -1    6.78    0.41 
   6   6   1    6.52    0.43 
   6   6   1    6.69    0.42 
  -7  -6  -1  139.38    2.70 
   7   6   1  144.16    2.69 
   7   6   1  136.00    2.64 
  -8  -6  -1   72.72    1.69 
   8   6   1   74.37    1.64 
   8   6   1   73.98    1.69 
  -9  -6  -1   24.73    0.89 
   9   6   1   23.49    0.89 
   9   6   1   23.49    0.82 
 -10  -6  -1   44.23    1.34 
  10   6   1   47.46    1.35 
  10   6   1   45.55    1.25 
 -11  -6  -1   29.74    1.11 
  11   6   1   30.29    1.01 
  11   6   1   28.71    1.09 
 -12  -6  -1   58.49    1.72 
  12   6   1   63.72    1.76 
  12   6   1   60.73    1.58 
 -13  -6  -1    1.97    0.52 
  13   6   1    2.05    0.44 
  13   6   1    2.48    0.53 
 -14  -6  -1   19.02    1.07 
  14   6   1   20.30    1.07 
  15   6   1    0.14    0.49 
  -9   7   1   -0.31    0.43 
   8  -7  -1   65.46    1.91 
  -8   7   1   68.97    1.88 
   7  -7  -1    0.02    0.39 
  -7   7   1   -0.10    0.36 
  -7   7   1    0.49    0.39 
   6  -7  -1   46.64    1.43 
  -6   7   1   45.70    1.43 
  -6   7   1   43.12    1.37 
   5  -7  -1   39.98    1.26 
  -5   7   1   38.78    1.22 
  -5   7   1   40.40    1.28 
   4  -7  -1   35.99    1.14 
  -4   7   1   40.47    1.21 
  -4   7   1   37.75    1.18 
   3  -7  -1   28.40    0.93 
  -3   7   1   27.64    0.95 
  -3   7   1   29.83    0.97 
   2  -7  -1  128.47    2.52 
  -2   7   1  126.13    2.58 
  -2   7   1  130.91    2.55 
   1  -7  -1  112.95    2.24 
  -1   7   1  111.90    2.29 
  -1   7   1  115.98    2.25 
   0  -7  -1    2.10    0.29 
   0  -7  -1    1.98    0.22 
   0   7   1    1.53    0.26 
   0   7   1    2.09    0.30 
  -1  -7  -1  147.74    2.67 
   1   7   1  145.56    2.59 
   1   7   1  146.89    2.70 
   1   7   1  146.15    2.74 
   2   7   1   59.45    1.28 
   2   7   1   58.38    1.31 
   2   7   1   59.76    1.30 
   2   7   1   60.36    1.27 
   3   7   1  147.51    2.65 
   3   7   1  146.04    2.71 
   3   7   1  148.32    2.67 
   3   7   1  149.40    2.69 
  -4  -7  -1    9.30    0.46 
   4   7   1   10.25    0.48 
   4   7   1    9.97    0.46 
   4   7   1    9.52    0.42 
  -5  -7  -1   94.51    1.90 
  -5  -7  -1   90.77    1.73 
   5   7   1   94.05    1.90 
   5   7   1   93.39    1.84 
  -6  -7  -1    1.64    0.29 
   6   7   1    1.24    0.28 
   6   7   1    1.94    0.29 
  -7  -7  -1  248.48    4.46 
   7   7   1  259.21    4.39 
   7   7   1  239.09    4.39 
  -8  -7  -1    1.85    0.35 
   8   7   1    1.67    0.33 
   8   7   1    0.71    0.28 
  -9  -7  -1   75.28    1.79 
   9   7   1   73.39    1.74 
   9   7   1   78.54    1.81 
 -10  -7  -1   26.61    0.99 
  10   7   1   29.15    1.04 
  10   7   1   27.89    0.97 
 -11  -7  -1   23.03    0.96 
  11   7   1   23.29    0.91 
  11   7   1   21.41    0.94 
 -12  -7  -1   19.97    0.96 
  12   7   1   18.74    0.86 
  12   7   1   18.63    0.93 
 -13  -7  -1   23.22    1.10 
  13   7   1   22.69    0.97 
  13   7   1   24.37    1.12 
 -14  -7  -1   21.76    1.13 
  14   7   1   20.69    1.10 
  14   7   1   21.04    0.97 
  -8   8   1   17.16    0.99 
   7  -8  -1   14.21    0.91 
  -7   8   1   15.23    0.90 
   6  -8  -1   48.85    1.55 
  -6   8   1   50.46    1.54 
   5  -8  -1    0.52    0.38 
  -5   8   1    0.13    0.35 
  -5   8   1    0.32    0.38 
   4  -8  -1   71.65    1.78 
  -4   8   1   70.39    1.80 
  -4   8   1   71.64    1.80 
   3  -8  -1    0.13    0.28 
  -3   8   1    0.16    0.28 
  -3   8   1    0.12    0.30 
   2  -8  -1  217.10    4.03 
  -2   8   1  221.80    4.15 
  -2   8   1  225.64    4.09 
   1  -8  -1    7.95    0.49 
  -1   8   1    8.21    0.57 
  -1   8   1    7.82    0.51 
   0  -8  -1  138.91    2.66 
   0   8   1  137.61    2.75 
   0   8   1  142.69    2.70 
  -1  -8  -1   61.48    1.28 
  -1  -8  -1   59.18    1.36 
   1   8   1   59.92    1.43 
   1   8   1   58.89    1.37 
   2   8   1  150.30    2.71 
   2   8   1  147.75    2.74 
   2   8   1  147.23    2.81 
   2   8   1  151.08    2.80 
   3   8   1   30.22    0.88 
   3   8   1   31.28    0.87 
   3   8   1   31.58    0.89 
   3   8   1   31.58    0.87 
  -4  -8  -1  105.36    2.11 
   4   8   1  106.83    2.10 
   4   8   1  105.44    2.05 
   4   8   1  104.07    2.03 
  -5  -8  -1   83.39    1.67 
  -5  -8  -1   86.43    1.81 
   5   8   1   84.29    1.81 
   5   8   1   87.56    1.75 
  -6  -8  -1   10.83    0.57 
   6   8   1   11.47    0.55 
   6   8   1   10.10    0.56 
  -7  -8  -1  154.83    2.98 
   7   8   1  150.11    2.95 
   7   8   1  155.25    2.89 
  -8  -8  -1    3.35    0.41 
   8   8   1    2.95    0.39 
   8   8   1    4.23    0.44 
  -9  -8  -1   97.30    2.20 
   9   8   1  105.70    2.20 
   9   8   1   95.46    2.15 
 -10  -8  -1    2.73    0.46 
  10   8   1    3.18    0.44 
  10   8   1    2.83    0.45 
 -11  -8  -1   59.99    1.70 
  11   8   1   61.56    1.67 
  11   8   1   62.02    1.64 
 -12  -8  -1    0.50    0.40 
  12   8   1    1.19    0.44 
  12   8   1    0.79    0.39 
 -13  -8  -1   48.65    1.57 
  13   8   1   44.97    1.44 
 -14  -8  -1    4.60    0.67 
  14   8   1    4.15    0.59 
  15   8   1   23.84    1.09 
   6  -9  -1   12.19    0.86 
  -6   9   1   11.01    0.83 
   5  -9  -1   42.45    1.42 
  -5   9   1   43.21    1.44 
   4  -9  -1   48.29    1.46 
  -4   9   1   47.51    1.46 
   3  -9  -1    8.59    0.59 
  -3   9   1    7.24    0.62 
  -3   9   1    8.14    0.61 
   2  -9  -1  102.19    2.27 
  -2   9   1  107.91    2.30 
  -2   9   1  102.50    2.33 
   1  -9  -1   28.47    0.95 
  -1   9   1   25.88    0.98 
  -1   9   1   28.43    0.94 
   0  -9  -1  103.20    2.16 
   0   9   1  103.33    2.25 
   0   9   1  105.00    2.18 
  -1  -9  -1    0.01    0.23 
   1   9   1    0.04    0.23 
   1   9   1   -0.01    0.27 
  -2  -9  -1  162.85    3.02 
   2   9   1  163.18    3.12 
   2   9   1  163.19    3.08 
   2   9   1  163.84    2.98 
   3   9   1    0.72    0.27 
   3   9   1    1.18    0.28 
   3   9   1    0.67    0.26 
   3   9   1    0.80    0.28 
   4   9   1  213.71    3.80 
   4   9   1  203.95    3.82 
   4   9   1  215.13    3.75 
   4   9   1  209.24    3.77 
  -5  -9  -1   16.52    0.68 
  -5  -9  -1   16.56    0.61 
   5   9   1   16.94    0.65 
   5   9   1   15.73    0.67 
  -6  -9  -1   90.89    1.97 
   6   9   1   90.90    1.99 
   6   9   1   92.88    1.91 
  -7  -9  -1   80.82    1.84 
   7   9   1   80.16    1.85 
   7   9   1   81.42    1.77 
  -8  -9  -1   76.01    1.80 
   8   9   1   76.74    1.83 
   8   9   1   77.67    1.75 
  -9  -9  -1   25.45    0.94 
   9   9   1   24.41    0.89 
   9   9   1   24.09    0.92 
 -10  -9  -1   34.17    1.17 
  10   9   1   35.27    1.15 
  10   9   1   35.14    1.17 
 -11  -9  -1   52.90    1.57 
  11   9   1   54.32    1.55 
 -12  -9  -1    4.23    0.57 
  12   9   1    4.88    0.58 
 -13  -9  -1   31.00    1.27 
  13   9   1   30.12    1.19 
  14   9   1    1.00    0.48 
   5 -10  -1   52.85    1.66 
  -5  10   1   50.59    1.67 
   4 -10  -1    4.33    0.60 
  -4  10   1    4.27    0.61 
   3 -10  -1   44.09    1.38 
  -3  10   1   42.68    1.41 
   2 -10  -1   39.20    1.23 
  -2  10   1   36.12    1.25 
   1 -10  -1   33.84    1.10 
  -1  10   1   30.88    1.14 
  -1  10   1   33.15    1.08 
   0 -10  -1   11.46    0.64 
   0  10   1   11.76    0.70 
   0  10   1   10.80    0.62 
  -1 -10  -1   53.60    1.38 
   1  10   1   56.08    1.41 
   1  10   1   55.63    1.49 
  -2 -10  -1  157.91    3.03 
   2  10   1  160.88    3.16 
   2  10   1  160.62    3.09 
  -3 -10  -1    8.28    0.52 
   3  10   1    8.92    0.56 
   3  10   1    8.60    0.55 
   3  10   1    8.34    0.56 
   3  10   1    9.08    0.53 
   4  10   1   82.85    1.83 
   4  10   1   81.75    1.77 
   4  10   1   80.85    1.84 
   4  10   1   82.19    1.82 
  -5 -10  -1   22.11    0.82 
   5  10   1   22.23    0.82 
   5  10   1   22.62    0.78 
  -6 -10  -1   68.26    1.65 
   6  10   1   70.30    1.58 
   6  10   1   68.09    1.67 
  -7 -10  -1    0.27    0.29 
   7  10   1    0.12    0.30 
   7  10   1    0.41    0.28 
  -8 -10  -1   84.43    1.99 
   8  10   1   80.93    1.98 
   8  10   1   89.51    1.92 
  -9 -10  -1   -0.06    0.30 
   9  10   1    0.42    0.34 
 -10 -10  -1   40.35    1.30 
  10  10   1   41.70    1.33 
 -11 -10  -1    3.68    0.55 
  11  10   1    3.00    0.52 
 -12 -10  -1   57.46    1.73 
  12  10   1   58.31    1.69 
 -13 -10  -1   26.30    1.19 
  13  10   1   23.72    1.10 
   4 -11  -1    6.26    0.70 
  -4  11   1    5.65    0.68 
   3 -11  -1   46.87    1.49 
  -3  11   1   42.34    1.48 
   2 -11  -1    3.98    0.54 
  -2  11   1    2.46    0.53 
   1 -11  -1   50.22    1.45 
  -1  11   1   49.62    1.52 
   0 -11  -1    3.16    0.45 
   0  11   1    2.56    0.48 
  -1 -11  -1   57.89    1.51 
   1  11   1   60.50    1.56 
   1  11   1   59.20    1.62 
  -2 -11  -1    6.63    0.55 
   2  11   1    7.00    0.56 
   2  11   1    6.42    0.59 
  -3 -11  -1   51.19    1.34 
   3  11   1   49.75    1.37 
   3  11   1   53.71    1.35 
   3  11   1   51.16    1.43 
  -4 -11  -1   48.68    1.33 
   4  11   1   48.95    1.31 
   4  11   1   48.41    1.29 
   4  11   1   46.90    1.32 
  -5 -11  -1   38.44    1.16 
   5  11   1   38.30    1.17 
   5  11   1   39.02    1.11 
  -6 -11  -1    7.12    0.54 
   6  11   1    4.77    0.51 
   6  11   1    5.73    0.49 
  -7 -11  -1   34.31    1.13 
   7  11   1   34.39    1.15 
  -8 -11  -1   52.28    1.46 
   8  11   1   49.94    1.47 
  -9 -11  -1    2.82    0.48 
   9  11   1    2.99    0.46 
 -10 -11  -1   46.46    1.44 
  10  11   1   43.87    1.42 
 -11 -11  -1    4.17    0.58 
  11  11   1    3.74    0.57 
 -12 -11  -1   59.46    1.78 
  12  11   1   57.89    1.76 
 -13 -11  -1    2.10    0.55 
  13  11   1    1.13    0.50 
   3 -12  -1    7.90    0.78 
   2 -12  -1   17.22    0.93 
  -2  12   1   14.13    0.95 
   1 -12  -1   41.66    1.37 
  -1  12   1   43.92    1.50 
   0 -12  -1    0.33    0.36 
   0  12   1   -0.11    0.39 
  -1 -12  -1   44.52    1.31 
   1  12   1   42.53    1.41 
  -2 -12  -1    3.67    0.48 
   2  12   1    3.53    0.53 
   3  12   1   74.83    1.90 
   3  12   1   76.31    1.87 
  -4 -12  -1    7.07    0.59 
   4  12   1    6.36    0.58 
  -5 -12  -1   56.60    1.52 
   5  12   1   55.73    1.51 
  -6 -12  -1    3.97    0.49 
   6  12   1    2.98    0.48 
  -7 -12  -1   40.88    1.27 
   7  12   1   38.76    1.28 
  -8 -12  -1    8.18    0.67 
   8  12   1    9.24    0.66 
  -9 -12  -1   15.15    0.82 
   9  12   1   13.11    0.82 
 -10 -12  -1   37.55    1.32 
  10  12   1   38.71    1.36 
 -11 -12  -1    9.63    0.79 
  11  12   1    9.67    0.82 
 -12 -12  -1   32.28    1.32 
  12  12   1   32.77    1.32 
   0  13   1   10.40    0.88 
   1  13   1   39.80    1.44 
   2  13   1    6.24    0.69 
  -3 -13  -1   14.75    0.83 
  -6 -13  -1    2.63    0.46 
   6  13   1    2.24    0.47 
  -7 -13  -1   45.59    1.42 
   7  13   1   47.02    1.47 
  -8 -13  -1   -0.30    0.35 
   8  13   1    0.23    0.39 
  -9 -13  -1   35.23    1.26 
   9  13   1   32.78    1.28 
 -10 -13  -1    6.65    0.70 
  10  13   1    5.54    0.67 
 -11 -13  -1   43.58    1.51 
  11  13   1   41.40    1.51 
  -1 -14  -1    7.95    0.81 
   1  14   1    7.90    0.84 
  -2 -14  -1   25.75    1.16 
  -3 -14  -1   23.78    1.09 
   7  14   1   54.44    1.66 
  -8 -14  -1    1.00    0.43 
   8  14   1    1.41    0.48 
  -9 -14  -1   11.60    0.81 
   9  14   1   11.37    0.85 
 -10 -14  -1    0.64    0.47 
   8  15   1   18.66    1.05 
   9  14  -2    0.04    0.46 
  -9 -14   2    0.17    0.45 
   8  14  -2   17.24    0.98 
  -8 -14   2   18.81    1.01 
  -7 -14   2    4.38    0.63 
  -6 -14   2   45.16    1.54 
   5  14  -2   20.20    1.03 
   4  14  -2   16.35    0.98 
   3  14  -2    8.28    0.80 
  -3 -14   2    7.58    0.78 
  10  13  -2   47.39    1.61 
 -10 -13   2   50.75    1.66 
   9  13  -2    9.00    0.77 
  -9 -13   2    7.19    0.74 
   8  13  -2   43.85    1.45 
  -8 -13   2   45.35    1.50 
   7  13  -2    2.90    0.52 
  -7 -13   2    2.69    0.53 
  -6 -13   2   72.14    1.96 
   5  13  -2    0.11    0.40 
   4  13  -2   50.78    1.57 
  -4 -13   2   48.15    1.53 
   3  13  -2    0.40    0.40 
  -3 -13   2    0.23    0.39 
   2  13  -2   44.10    1.49 
  -2 -13   2   45.88    1.53 
   1  13  -2    2.67    0.55 
  -1 -13   2    3.54    0.60 
   0 -13   2   42.69    1.55 
  11  12  -2   44.41    1.52 
 -11 -12   2   43.02    1.52 
  10  12  -2   13.33    0.82 
 -10 -12   2   14.03    0.84 
   9  12  -2   69.34    1.90 
  -9 -12   2   70.30    1.94 
   8  12  -2   26.79    1.09 
  -8 -12   2   27.73    1.12 
   7  12  -2   33.81    1.20 
  -7 -12   2   36.20    1.24 
   6  12  -2   28.93    1.06 
  -6 -12   2   28.92    1.12 
   5  12  -2   36.49    1.27 
   5  12  -2   37.16    1.19 
   4  12  -2   56.01    1.64 
  -4 -12   2   59.50    1.63 
   3  12  -2   13.47    0.80 
  -3 -12   2   14.92    0.83 
   2  12  -2   38.45    1.32 
  -2 -12   2   40.69    1.36 
   1  12  -2    5.83    0.63 
  -1 -12   2    4.94    0.62 
   0  12  -2   42.64    1.45 
   0 -12   2   42.86    1.47 
  -1  12  -2    0.46    0.44 
   1 -12   2    0.09    0.44 
  12  11  -2    6.44    0.70 
 -12 -11   2    8.22    0.79 
  11  11  -2   19.86    1.00 
 -11 -11   2   19.69    1.01 
  10  11  -2    0.99    0.42 
 -10 -11   2    1.42    0.42 
   9  11  -2   55.02    1.61 
  -9 -11   2   57.52    1.66 
   8  11  -2    2.06    0.45 
  -8 -11   2    3.48    0.51 
   7  11  -2   83.33    1.99 
  -7 -11   2   81.93    2.03 
   6  11  -2    7.77    0.61 
  -6 -11   2    7.39    0.63 
   5  11  -2   45.52    1.37 
   5  11  -2   43.40    1.26 
  -5 -11   2   44.69    1.30 
   4  11  -2    5.54    0.56 
   4  11  -2    5.45    0.51 
  -4 -11   2    5.05    0.52 
   3  11  -2   80.26    1.99 
  -3 -11   2   82.45    1.98 
   2  11  -2   53.11    1.52 
  -2 -11   2   53.74    1.54 
   1  11  -2    5.05    0.57 
  -1 -11   2    5.59    0.59 
   0  11  -2   23.98    1.02 
   0 -11   2   24.12    1.01 
  -1  11  -2   31.71    1.23 
  -1  11  -2   33.25    1.26 
   1 -11   2   32.50    1.25 
  -2  11  -2   53.35    1.69 
  -2  11  -2   53.72    1.68 
  -3  11  -2    7.69    0.77 
  -3  11  -2    6.76    0.73 
   4 -11   2   20.85    1.04 
  13  10  -2    5.37    0.69 
 -13 -10   2    5.75    0.72 
  12  10  -2   32.14    1.26 
 -12 -10   2   34.85    1.31 
  11  10  -2    9.51    0.69 
 -11 -10   2   12.25    0.81 
  10  10  -2    1.86    0.42 
 -10 -10   2    2.35    0.48 
   9  10  -2   49.01    1.44 
  -9 -10   2   48.83    1.48 
   8  10  -2   27.34    1.03 
  -8 -10   2   28.54    1.07 
   7  10  -2   74.11    1.78 
  -7 -10   2   71.50    1.81 
   6  10  -2   10.87    0.63 
  -6 -10   2    9.31    0.63 
   5  10  -2   51.75    1.35 
   5  10  -2   50.85    1.41 
  -5 -10   2   51.06    1.34 
   4  10  -2    0.26    0.29 
   4  10  -2    0.05    0.25 
  -4 -10   2    0.29    0.28 
   3  10  -2   88.40    2.09 
   3  10  -2   96.59    1.96 
  -3 -10   2   92.27    2.08 
   2  10  -2    1.29    0.33 
  -2 -10   2    1.23    0.33 
   1  10  -2   44.01    1.32 
  -1 -10   2   42.42    1.31 
   0  10  -2    7.41    0.65 
   0  10  -2    6.78    0.61 
   0 -10   2    5.57    0.50 
  -1  10  -2   31.87    1.18 
  -1  10  -2   33.57    1.18 
   1 -10   2   32.39    1.05 
  -2  10  -2    9.01    0.74 
  -2  10  -2    8.56    0.73 
   2 -10   2    8.17    0.66 
  -3  10  -2   60.86    1.78 
  -3  10  -2   59.56    1.76 
   3 -10   2   56.64    1.61 
  -4  10  -2   19.69    1.03 
  -4  10  -2   20.19    1.04 
   4 -10   2   19.60    0.96 
  -5  10  -2    7.09    0.77 
  -5  10  -2    4.93    0.70 
   5 -10   2    7.19    0.74 
  14   9  -2   17.69    0.96 
  13   9  -2    2.26    0.52 
 -13  -9   2    1.81    0.53 
  12   9  -2   50.78    1.58 
 -12  -9   2   55.08    1.68 
  11   9  -2    0.02    0.36 
 -11  -9   2    0.32    0.35 
  10   9  -2   20.85    0.93 
 -10  -9   2   22.75    0.97 
   9   9  -2   16.03    0.80 
  -9  -9   2   16.93    0.82 
   8   9  -2   42.59    1.27 
  -8  -9   2   43.85    1.31 
   7   9  -2   45.33    1.28 
  -7  -9   2   48.95    1.35 
   6   9  -2   85.71    1.91 
  -6  -9   2   84.67    1.95 
   5   9  -2   53.43    1.32 
   5   9  -2   51.10    1.36 
  -5  -9   2   50.82    1.28 
   4   9  -2   18.81    0.76 
   4   9  -2   19.08    0.72 
  -4  -9   2   19.48    0.75 
   3   9  -2   54.89    1.28 
   3   9  -2   52.65    1.38 
  -3  -9   2   51.29    1.35 
   2   9  -2    6.36    0.44 
   2   9  -2    6.52    0.53 
  -2  -9   2    6.91    0.54 
  -2  -9   2    6.31    0.41 
   1   9  -2   99.71    2.21 
   1   9  -2  100.41    2.23 
  -1  -9   2  104.91    2.05 
  -1  -9   2  101.73    2.23 
   0   9  -2    1.32    0.38 
   0   9  -2    1.24    0.35 
   0  -9   2    2.11    0.34 
  -1   9  -2   39.66    1.24 
  -1   9  -2   40.94    1.28 
   1  -9   2   39.62    1.13 
  -2   9  -2    7.85    0.66 
  -2   9  -2    7.98    0.66 
   2  -9   2    6.35    0.55 
  -3   9  -2   40.58    1.35 
  -3   9  -2   40.11    1.32 
   3  -9   2   42.11    1.27 
  -4   9  -2    1.46    0.45 
  -4   9  -2    1.34    0.44 
   4  -9   2    1.25    0.42 
  -5   9  -2   46.23    1.53 
  -5   9  -2   50.35    1.62 
   5  -9   2   45.95    1.49 
  -6   9  -2   11.15    0.84 
  -6   9  -2   11.72    0.88 
   6  -9   2   11.25    0.88 
  -7   9  -2    6.72    0.78 
  14   8  -2   25.44    1.11 
 -14  -8   2   22.68    1.18 
  13   8  -2    3.11    0.54 
 -13  -8   2    3.53    0.60 
  12   8  -2   66.30    1.79 
 -12  -8   2   67.34    1.89 
  11   8  -2   12.62    0.75 
 -11  -8   2   12.14    0.75 
  10   8  -2   58.35    1.58 
 -10  -8   2   60.03    1.65 
   9   8  -2    0.44    0.28 
  -9  -8   2    1.04    0.33 
   8   8  -2   71.62    1.71 
  -8  -8   2   72.21    1.76 
   7   8  -2    3.58    0.42 
  -7  -8   2    2.46    0.37 
   6   8  -2   74.08    1.68 
   6   8  -2   72.74    1.49 
  -6  -8   2   76.92    1.74 
  -6  -8   2   75.14    1.59 
   5   8  -2   10.28    0.44 
   5   8  -2    9.41    0.52 
   5   8  -2    9.68    0.55 
  -5  -8   2    9.06    0.50 
  -5  -8   2    8.65    0.54 
   4   8  -2   68.04    1.61 
   4   8  -2   67.31    1.51 
   4   8  -2   69.50    1.39 
  -4  -8   2   70.54    1.54 
   3   8  -2   88.37    1.92 
   3   8  -2   91.01    1.82 
  -3  -8   2   89.57    1.72 
  -3  -8   2   88.60    1.88 
   2   8  -2   16.55    0.59 
   2   8  -2   16.12    0.67 
  -2  -8   2   15.65    0.67 
  -2  -8   2   16.71    0.58 
   1   8  -2   66.13    1.57 
   1   8  -2   64.20    1.57 
   1   8  -2   65.93    1.36 
  -1  -8   2   67.11    1.42 
   0   8  -2   44.62    1.25 
   0   8  -2   46.84    1.28 
   0  -8   2   44.84    1.12 
  -1   8  -2  192.25    3.72 
  -1   8  -2  194.78    3.72 
   1  -8   2  195.32    3.53 
  -2   8  -2    3.31    0.45 
  -2   8  -2    4.25    0.49 
   2  -8   2    3.92    0.43 
  -3   8  -2   61.13    1.64 
  -3   8  -2   58.76    1.60 
   3  -8   2   57.74    1.50 
  -4   8  -2    3.90    0.52 
  -4   8  -2    3.58    0.53 
   4  -8   2    3.62    0.49 
  -5   8  -2   69.57    1.92 
  -5   8  -2   69.64    1.86 
   5  -8   2   66.84    1.80 
  -6   8  -2   -0.46    0.36 
  -6   8  -2   -0.15    0.39 
   6  -8   2   -0.34    0.37 
  -7   8  -2   18.18    1.04 
  -7   8  -2   17.16    0.95 
   7  -8   2   15.55    0.95 
  -8   8  -2    1.83    0.56 
  14   7  -2    4.48    0.60 
 -14  -7   2    4.35    0.64 
  13   7  -2   55.24    1.60 
 -13  -7   2   55.49    1.74 
  12   7  -2   58.50    1.58 
 -12  -7   2   53.34    1.64 
  11   7  -2   20.88    0.88 
 -11  -7   2   22.64    0.97 
  10   7  -2   43.14    1.27 
 -10  -7   2   42.54    1.32 
   9   7  -2   48.04    1.24 
   9   7  -2   45.47    1.29 
  -9  -7   2   48.29    1.36 
   8   7  -2   48.44    1.32 
   8   7  -2   54.15    1.25 
  -8  -7   2   51.75    1.37 
   7   7  -2    2.84    0.31 
   7   7  -2    2.62    0.36 
  -7  -7   2    2.15    0.34 
   6   7  -2   76.00    1.47 
   6   7  -2   71.06    1.60 
  -6  -7   2   72.59    1.66 
  -6  -7   2   71.50    1.51 
   5   7  -2    0.32    0.22 
   5   7  -2    0.42    0.18 
  -5  -7   2    0.85    0.22 
  -5  -7   2    0.34    0.23 
   4   7  -2  199.58    3.51 
   4   7  -2  198.89    3.35 
   4   7  -2  199.56    3.62 
  -4  -7   2  194.64    3.51 
   3   7  -2    0.48    0.18 
   3   7  -2    0.29    0.18 
   3   7  -2   -0.01    0.19 
  -3  -7   2    0.09    0.19 
   2   7  -2  135.58    2.40 
   2   7  -2  134.35    2.56 
  -2  -7   2  128.27    2.51 
  -2  -7   2  128.99    2.34 
   1   7  -2   39.27    0.90 
   1   7  -2   38.28    1.05 
   1   7  -2   39.41    1.06 
  -1  -7   2   38.47    0.92 
   0   7  -2  143.23    2.82 
   0   7  -2  149.09    2.54 
   0  -7   2  146.09    2.66 
  -1   7  -2   46.47    1.27 
   1  -7   2   49.74    1.18 
  -2   7  -2  110.24    2.37 
  -2   7  -2  111.37    2.36 
   2  -7   2  112.14    2.24 
  -3   7  -2  107.23    2.30 
  -3   7  -2  105.24    2.35 
   3  -7   2  103.63    2.19 
  -4   7  -2    8.85    0.61 
  -4   7  -2    8.54    0.64 
   4  -7   2    8.23    0.59 
  -5   7  -2   38.46    1.31 
  -5   7  -2   37.35    1.21 
   5  -7   2   36.64    1.19 
  -6   7  -2   27.24    1.16 
  -6   7  -2   29.42    1.11 
   6  -7   2   30.07    1.13 
  -7   7  -2   47.88    1.61 
  -7   7  -2   49.72    1.53 
   7  -7   2   48.14    1.54 
  -8   7  -2   -0.60    0.39 
  -8   7  -2    0.16    0.46 
   8  -7   2    0.07    0.45 
  -9   7  -2   23.53    1.22 
  -9   7  -2   23.23    1.11 
  14   6  -2    2.08    0.50 
 -14  -6   2    2.00    0.53 
  13   6  -2   73.32    1.87 
 -13  -6   2   74.83    2.07 
  12   6  -2   -0.15    0.32 
 -12  -6   2   -0.02    0.33 
  11   6  -2   65.53    1.67 
  11   6  -2   69.61    1.74 
 -11  -6   2   67.80    1.80 
  10   6  -2   13.39    0.70 
  10   6  -2   15.59    0.72 
 -10  -6   2   14.14    0.72 
   9   6  -2   97.01    2.03 
   9   6  -2   92.67    2.03 
  -9  -6   2   93.70    2.12 
   8   6  -2   75.66    1.61 
   8   6  -2   71.32    1.65 
  -8  -6   2   72.56    1.70 
   7   6  -2   44.88    1.06 
   7   6  -2   42.81    1.13 
  -7  -6   2   42.32    1.16 
   6   6  -2  123.02    2.23 
   6   6  -2  120.14    2.36 
  -6  -6   2  122.26    2.42 
  -6  -6   2  124.29    2.26 
   5   6  -2   17.11    0.62 
   5   6  -2   17.60    0.52 
  -5  -6   2   17.84    0.66 
  -5  -6   2   18.48    0.58 
   4   6  -2  187.91    3.12 
   4   6  -2  181.83    3.27 
   4   6  -2  191.15    3.38 
  -4  -6   2  182.86    3.25 
   3   6  -2   59.02    1.14 
   3   6  -2   58.79    1.32 
   3   6  -2   59.09    1.24 
  -3  -6   2   57.81    1.26 
   2   6  -2  230.82    4.08 
   2   6  -2  231.07    3.91 
  -2  -6   2  231.76    3.85 
  -2  -6   2  236.36    4.05 
   1   6  -2   12.10    0.51 
   1   6  -2   12.05    0.53 
   1   6  -2   13.06    0.44 
  -1  -6   2   11.70    0.42 
   0   6  -2  102.20    1.79 
   0   6  -2   99.87    2.03 
   0  -6   2   99.06    1.88 
  -1   6  -2    5.34    0.26 
  -1   6  -2    4.82    0.42 
  -1   6  -2    6.45    0.46 
   1  -6   2    5.85    0.39 
  -2   6  -2  247.66    4.50 
  -2   6  -2  251.87    4.46 
   2  -6   2  246.54    4.31 
  -3   6  -2   12.10    0.66 
  -3   6  -2   13.39    0.65 
   3  -6   2   13.22    0.62 
  -4   6  -2   97.13    2.13 
  -4   6  -2   99.21    2.23 
   4  -6   2   95.92    2.09 
  -5   6  -2   36.07    1.13 
  -5   6  -2   32.92    1.15 
   5  -6   2   35.51    1.14 
  -6   6  -2   61.78    1.77 
  -6   6  -2   64.82    1.68 
   6  -6   2   66.93    1.70 
  -7   6  -2   10.74    0.71 
  -7   6  -2   10.22    0.76 
   7  -6   2   11.03    0.75 
  -8   6  -2   46.93    1.59 
  -8   6  -2   46.45    1.46 
   8  -6   2   48.37    1.55 
  -9   6  -2   36.98    1.30 
  -9   6  -2   33.80    1.40 
   9  -6   2   35.67    1.36 
 -14  -5   2   12.15    0.91 
  13   5  -2   36.13    1.18 
  13   5  -2   33.74    1.27 
 -13  -5   2   34.99    1.35 
  12   5  -2   32.77    1.10 
  12   5  -2   34.69    1.21 
 -12  -5   2   33.36    1.23 
  11   5  -2   63.28    1.56 
  11   5  -2   61.85    1.64 
 -11  -5   2   60.20    1.68 
  10   5  -2    1.47    0.37 
  10   5  -2    1.55    0.35 
 -10  -5   2    2.16    0.39 
   9   5  -2  163.24    3.11 
   9   5  -2  166.92    3.13 
  -9  -5   2  163.19    3.24 
   8   5  -2   20.86    0.75 
   8   5  -2   22.51    0.75 
  -8  -5   2   20.67    0.80 
   7   5  -2  161.83    2.90 
   7   5  -2  159.12    2.96 
  -7  -5   2  159.18    3.03 
   6   5  -2   20.20    0.67 
   6   5  -2   19.58    0.62 
  -6  -5   2   20.39    0.69 
  -6  -5   2   20.78    0.59 
   5   5  -2  143.98    2.63 
   5   5  -2  143.81    2.51 
  -5  -5   2  147.04    2.57 
  -5  -5   2  144.62    2.70 
   4   5  -2   96.14    1.70 
   4   5  -2   93.60    1.82 
  -4  -5   2   94.68    1.88 
  -4  -5   2   98.00    1.80 
   3   5  -2  209.40    3.62 
   3   5  -2  217.16    3.50 
   3   5  -2  213.54    3.73 
  -3  -5   2  216.39    3.66 
   2   5  -2   50.53    0.96 
   2   5  -2   49.71    1.11 
   2   5  -2   48.51    1.02 
  -2  -5   2   49.21    1.08 
   1   5  -2   86.13    1.56 
   1   5  -2   86.42    1.72 
   1   5  -2   85.39    1.70 
  -1  -5   2   86.97    1.56 
  -1  -5   2   85.66    1.70 
   0   5  -2  309.37    4.92 
   0   5  -2  305.40    5.18 
   0   5  -2  303.85    5.21 
   0  -5   2  301.86    4.99 
  -1   5  -2   21.64    0.48 
  -1   5  -2   20.93    0.69 
  -1   5  -2   21.98    0.72 
   1  -5   2   21.59    0.63 
  -2   5  -2  160.47    3.00 
  -2   5  -2  154.82    2.92 
   2  -5   2  156.02    2.83 
  -3   5  -2   37.05    1.09 
  -3   5  -2   37.26    1.04 
   3  -5   2   36.44    1.00 
  -4   5  -2  170.81    3.31 
  -4   5  -2  167.50    3.18 
   4  -5   2  165.53    3.15 
  -5   5  -2    0.73    0.28 
  -5   5  -2    0.50    0.32 
   5  -5   2    1.06    0.34 
  -6   5  -2  137.88    2.92 
  -6   5  -2  136.78    2.78 
   6  -5   2  134.23    2.80 
  -7   5  -2    2.15    0.40 
  -7   5  -2    2.11    0.44 
   7  -5   2    1.61    0.44 
  -8   5  -2   55.31    1.52 
  -8   5  -2   55.08    1.66 
   8  -5   2   54.03    1.62 
  -9   5  -2    2.91    0.57 
  -9   5  -2    1.43    0.45 
   9  -5   2    2.33    0.50 
 -10   5  -2   27.58    1.29 
  10  -5   2   29.03    1.28 
  14   4  -2   26.80    1.22 
 -14  -4   2   26.89    1.26 
  13   4  -2    9.85    0.81 
 -13  -4   2    8.83    0.81 
  12   4  -2   55.32    1.41 
  12   4  -2   50.62    1.53 
 -12  -4   2   47.97    1.54 
  11   4  -2    1.86    0.40 
  11   4  -2    1.59    0.35 
 -11  -4   2    1.83    0.44 
  10   4  -2   67.69    1.67 
  10   4  -2   67.31    1.57 
 -10  -4   2   68.01    1.72 
   9   4  -2   81.58    1.79 
   9   4  -2   79.13    1.72 
  -9  -4   2   74.83    1.83 
   8   4  -2   37.96    1.02 
   8   4  -2   40.67    1.07 
  -8  -4   2   38.22    1.11 
   7   4  -2  112.96    2.16 
   7   4  -2  109.66    2.16 
  -7  -4   2  115.43    1.99 
  -7  -4   2  110.35    2.24 
   6   4  -2   71.10    1.51 
   6   4  -2   74.89    1.49 
  -6  -4   2   72.59    1.57 
  -6  -4   2   76.04    1.39 
   5   4  -2  250.26    4.11 
   5   4  -2  241.88    4.18 
  -5  -4   2  247.85    4.28 
  -5  -4   2  248.25    4.12 
   4   4  -2   14.55    0.41 
   4   4  -2   13.59    0.48 
  -4  -4   2   14.82    0.46 
  -4  -4   2   13.93    0.49 
   3   4  -2  378.54    6.21 
   3   4  -2  377.06    6.34 
   3   4  -2  384.63    6.08 
  -3  -4   2  393.52    6.26 
   2   4  -2    6.70    0.34 
   2   4  -2    6.64    0.30 
   2   4  -2    6.65    0.24 
  -2  -4   2    6.86    0.30 
   1   4  -2  194.76    3.16 
   1   4  -2  186.78    3.30 
  -1  -4   2  189.04    3.11 
  -1  -4   2  192.31    3.28 
   0   4  -2   62.80    1.33 
   0   4  -2   64.98    1.16 
   0  -4   2   65.10    1.22 
  -1   4  -2  224.38    3.93 
  -1   4  -2  223.09    3.88 
  -1   4  -2  230.56    3.60 
   1  -4   2  222.60    3.76 
  -2   4  -2  116.92    2.23 
  -2   4  -2  121.17    2.31 
   2  -4   2  114.79    2.16 
  -3   4  -2  171.09    3.20 
  -3   4  -2  182.65    3.31 
   3  -4   2  177.31    3.17 
  -4   4  -2   12.13    0.60 
  -4   4  -2   12.04    0.54 
   4  -4   2   12.87    0.57 
  -5   4  -2  159.54    2.98 
  -5   4  -2  155.81    3.11 
   5  -4   2  154.02    2.99 
  -6   4  -2  164.46    3.28 
  -6   4  -2  159.65    3.11 
   6  -4   2  164.64    3.19 
  -7   4  -2    6.75    0.62 
  -7   4  -2    6.58    0.53 
   7  -4   2    6.63    0.59 
  -8   4  -2   33.92    1.21 
  -8   4  -2   33.06    1.07 
   8  -4   2   31.02    1.15 
  -9   4  -2   14.18    0.75 
  -9   4  -2   13.87    0.86 
   9  -4   2   13.67    0.86 
 -10   4  -2   39.23    1.47 
  10  -4   2   38.34    1.44 
 -11   4  -2    2.99    0.62 
  14   3  -2   26.76    1.24 
 -14  -3   2   27.60    1.28 
  13   3  -2   -0.57    0.38 
 -13  -3   2    0.54    0.42 
  12   3  -2   46.19    1.46 
 -12  -3   2   44.81    1.49 
  11   3  -2    0.38    0.28 
  11   3  -2    0.13    0.33 
 -11  -3   2    0.38    0.36 
  10   3  -2   32.16    0.95 
  10   3  -2   30.41    1.05 
 -10  -3   2   32.17    1.11 
   9   3  -2   14.46    0.69 
   9   3  -2   14.83    0.62 
  -9  -3   2   14.60    0.69 
   8   3  -2   70.84    1.53 
   8   3  -2   72.72    1.61 
  -8  -3   2   72.67    1.67 
   7   3  -2   63.93    1.40 
   7   3  -2   68.95    1.46 
  -7  -3   2   64.55    1.49 
  -7  -3   2   69.06    1.28 
   6   3  -2  175.03    3.13 
   6   3  -2  180.18    3.13 
  -6  -3   2  180.42    3.24 
  -6  -3   2  181.48    3.02 
   5   3  -2   60.46    1.22 
   5   3  -2   61.83    1.27 
  -5  -3   2   62.59    1.17 
  -5  -3   2   61.59    1.31 
   4   3  -2   79.10    1.51 
   4   3  -2   80.32    1.45 
  -4  -3   2   80.94    1.47 
  -4  -3   2   79.59    1.56 
   3   3  -2  521.18    8.17 
   3   3  -2  515.37    8.30 
  -3  -3   2  511.57    8.44 
  -3  -3   2  532.60    8.37 
   2   3  -2  115.95    1.86 
   2   3  -2  110.26    1.96 
   2   3  -2  114.74    2.03 
  -2  -3   2  113.79    1.99 
   1   3  -2  173.19    2.84 
   1   3  -2  170.41    2.95 
  -1  -3   2  175.28    2.93 
  -1  -3   2  172.39    2.78 
   0   3  -2  123.65    2.22 
   0   3  -2  126.47    2.05 
   0   3  -2  121.18    2.19 
   0  -3   2  125.99    2.09 
  -1   3  -2  198.79    3.15 
  -1   3  -2  199.34    3.44 
   1  -3   2  195.57    3.29 
  -2   3  -2    7.29    0.39 
  -2   3  -2    6.53    0.35 
   2  -3   2    6.84    0.34 
  -3   3  -2  107.55    2.05 
  -3   3  -2  108.44    2.15 
   3  -3   2  109.20    2.05 
  -4   3  -2   16.62    0.65 
  -4   3  -2   17.15    0.60 
   4  -3   2   16.78    0.62 
  -5   3  -2  104.92    2.08 
  -5   3  -2  103.54    2.20 
   5  -3   2  106.02    2.15 
  -6   3  -2   10.24    0.63 
  -6   3  -2   11.47    0.55 
   6  -3   2   10.40    0.59 
  -7   3  -2   49.32    1.42 
  -7   3  -2   52.57    1.29 
   7  -3   2   50.10    1.40 
  -8   3  -2   37.38    1.28 
  -8   3  -2   40.27    1.13 
   8  -3   2   38.77    1.26 
  -9   3  -2   20.88    0.99 
   9  -3   2   19.25    0.95 
 -10   3  -2   19.70    1.03 
  10  -3   2   21.20    1.04 
 -11   3  -2   21.06    1.12 
  11  -3   2   20.71    1.07 
  14   2  -2   11.37    0.96 
 -14  -2   2   12.85    0.98 
  13   2  -2    5.37    0.69 
 -13  -2   2    6.13    0.72 
  12   2  -2   60.89    1.75 
 -12  -2   2   61.40    1.79 
  11   2  -2    0.71    0.38 
 -11  -2   2    0.50    0.35 
  10   2  -2   60.12    1.38 
  10   2  -2   61.03    1.59 
 -10  -2   2   57.26    1.57 
   9   2  -2   13.08    0.67 
   9   2  -2   13.84    0.59 
  -9  -2   2   13.16    0.67 
   8   2  -2   93.43    1.96 
   8   2  -2   94.18    1.84 
  -8  -2   2   90.33    2.00 
  -8  -2   2   94.10    1.74 
   7   2  -2   46.26    1.14 
   7   2  -2   46.05    1.07 
  -7  -2   2   46.97    1.19 
  -7  -2   2   47.35    0.97 
   6   2  -2  185.04    3.26 
   6   2  -2  186.40    3.30 
  -6  -2   2  190.90    3.40 
  -6  -2   2  194.52    3.19 
   5   2  -2    4.33    0.31 
   5   2  -2    3.94    0.28 
  -5  -2   2    4.05    0.29 
  -5  -2   2    4.70    0.25 
   4   2  -2  265.26    4.40 
   4   2  -2  269.58    4.36 
  -4  -2   2  267.63    4.49 
  -4  -2   2  269.01    4.37 
   3   2  -2   48.19    0.92 
  -3  -2   2   50.70    1.01 
  -3  -2   2   51.72    0.97 
   2   2  -2   60.41    1.02 
   2   2  -2   59.32    1.14 
  -2  -2   2   62.56    1.13 
   1   2  -2   99.51    1.74 
   1   2  -2   99.18    1.68 
  -1  -2   2  100.39    1.73 
  -1  -2   2   98.51    1.59 
   0   2  -2   34.45    0.63 
   0   2  -2   33.18    0.72 
   0  -2   2   34.85    0.71 
   0  -2   2   34.00    0.64 
  -1   2  -2   69.09    1.31 
  -1   2  -2   68.57    1.34 
  -1   2  -2   69.41    1.14 
   1  -2   2   71.12    1.26 
  -2   2  -2   85.79    1.59 
  -2   2  -2   85.85    1.65 
   2  -2   2   85.54    1.58 
  -3   2  -2  255.35    4.25 
  -3   2  -2  251.88    4.36 
   3  -2   2  250.69    4.24 
  -4   2  -2    8.70    0.40 
  -4   2  -2    7.94    0.44 
   4  -2   2    9.04    0.46 
  -5   2  -2  104.56    2.13 
  -5   2  -2  100.27    1.96 
   5  -2   2  102.79    2.06 
  -6   2  -2    1.80    0.28 
  -6   2  -2    1.57    0.33 
   6  -2   2    2.12    0.33 
  -7   2  -2   66.25    1.46 
  -7   2  -2   63.31    1.63 
   7  -2   2   66.49    1.63 
  -8   2  -2    0.02    0.31 
  -8   2  -2   -0.01    0.23 
   8  -2   2    0.54    0.36 
  -9   2  -2   67.14    1.84 
   9  -2   2   69.47    1.82 
 -10   2  -2    5.78    0.66 
  10  -2   2    7.10    0.71 
 -11   2  -2   33.17    1.34 
  11  -2   2   33.48    1.33 
 -12   2  -2    6.07    0.73 
  12  -2   2    5.28    0.74 
  14   1  -2    4.14    0.70 
  13   1  -2   19.39    1.06 
 -13  -1   2   19.41    1.09 
  12   1  -2   28.60    1.18 
 -12  -1   2   29.20    1.22 
  11   1  -2   13.91    0.78 
 -11  -1   2   14.15    0.84 
  10   1  -2  111.71    2.46 
 -10  -1   2  110.41    2.48 
   9   1  -2   22.54    0.71 
   9   1  -2   23.21    0.89 
  -9  -1   2   21.55    0.89 
   8   1  -2   26.43    0.73 
   8   1  -2   25.23    0.88 
  -8  -1   2   25.51    0.70 
  -8  -1   2   26.24    0.90 
   7   1  -2    6.31    0.37 
   7   1  -2    5.97    0.46 
  -7  -1   2    6.12    0.46 
  -7  -1   2    7.10    0.35 
   6   1  -2  197.04    3.40 
   6   1  -2  200.88    3.51 
  -6  -1   2  203.53    3.57 
  -6  -1   2  199.49    3.39 
   5   1  -2   14.51    0.50 
   5   1  -2   15.39    0.47 
  -5  -1   2   15.40    0.53 
  -5  -1   2   14.63    0.43 
   4   1  -2  156.23    2.70 
   4   1  -2  159.41    2.69 
  -4  -1   2  156.41    2.77 
  -4  -1   2  163.43    2.68 
   3   1  -2   97.13    1.69 
   3   1  -2   99.89    1.73 
  -3  -1   2   99.46    1.76 
  -3  -1   2   97.70    1.71 
   2   1  -2  260.75    4.21 
   2   1  -2  263.19    4.13 
  -2  -1   2  259.82    4.27 
  -2  -1   2  263.39    4.25 
   1   1  -2   21.76    0.48 
   1   1  -2   22.68    0.48 
  -1  -1   2   24.41    0.51 
   0   1  -2  737.53   12.08 
   0   1  -2  753.80   12.20 
   0  -1   2  786.02   11.98 
  -1   1  -2   51.47    0.88 
  -1   1  -2   52.46    1.00 
   1  -1   2   51.24    0.94 
   1  -1   2   53.41    0.97 
  -2   1  -2  120.52    2.15 
  -2   1  -2  121.30    1.94 
  -2   1  -2  120.87    2.08 
   2  -1   2  120.82    2.08 
  -3   1  -2  173.91    3.10 
  -3   1  -2  177.29    2.99 
  -3   1  -2  177.48    2.82 
   3  -1   2  179.26    3.03 
  -4   1  -2   59.02    1.31 
  -4   1  -2   61.61    1.21 
   4  -1   2   61.75    1.05 
   4  -1   2   60.99    1.29 
  -5   1  -2  140.05    2.50 
  -5   1  -2  143.33    2.69 
   5  -1   2  139.07    2.31 
   5  -1   2  141.19    2.62 
  -6   1  -2    1.85    0.24 
  -6   1  -2    1.72    0.30 
   6  -1   2    2.24    0.34 
  -7   1  -2   18.20    0.76 
  -7   1  -2   18.50    0.61 
   7  -1   2   17.31    0.73 
  -8   1  -2   12.74    0.55 
  -8   1  -2   12.16    0.71 
   8  -1   2   12.98    0.71 
  -9   1  -2   82.58    2.04 
   9  -1   2   81.82    2.01 
 -10   1  -2    3.79    0.56 
  10  -1   2    3.41    0.54 
 -11   1  -2   31.27    1.27 
  11  -1   2   29.71    1.22 
 -12   1  -2    0.08    0.45 
  12  -1   2    0.02    0.45 
  13   0  -2   26.45    1.23 
 -13   0   2   27.91    1.29 
  12   0  -2    0.56    0.44 
 -12   0   2    1.57    0.50 
  11   0  -2   49.90    1.55 
 -11   0   2   49.47    1.55 
  10   0  -2   28.38    1.08 
 -10   0   2   27.52    1.07 
   9   0  -2  112.44    2.44 
  -9   0   2  115.05    2.47 
   8   0  -2   22.54    0.82 
   8   0  -2   22.86    0.66 
  -8   0   2   22.36    0.69 
  -8   0   2   21.68    0.84 
   7   0  -2   20.09    0.74 
   7   0  -2   20.45    0.59 
  -7   0   2   19.89    0.75 
  -7   0   2   19.79    0.61 
   6   0  -2   97.52    1.94 
   6   0  -2   95.65    1.77 
  -6   0   2   97.81    1.82 
  -6   0   2   97.76    1.95 
   5   0  -2   40.73    0.87 
   5   0  -2   40.36    0.98 
  -5   0   2   42.65    0.90 
  -5   0   2   41.88    0.98 
   4   0  -2  485.22    7.83 
   4   0  -2  495.83    7.78 
  -4   0   2  489.53    7.87 
  -4   0   2  484.81    7.96 
   3   0  -2   62.60    1.13 
   3   0  -2   61.31    1.16 
  -3   0   2   60.72    1.17 
  -3   0   2   61.23    1.14 
   2   0  -2  140.69    2.31 
   2   0  -2  142.66    2.29 
  -2   0   2  137.19    2.33 
  -2   0   2  137.73    2.33 
   1   0  -2  369.81    5.83 
   1   0  -2  372.50    5.79 
  -1   0   2  374.20    6.00 
  -1   0   2  361.09    5.89 
   0   0  -2  719.71   11.59 
   0   0  -2  724.41   11.78 
   0   0   2  737.79   11.77 
   0   0   2  722.48   11.46 
  -1   0  -2    4.32    0.14 
  -1   0  -2    3.90    0.17 
   1   0   2    3.80    0.15 
   1   0   2    3.87    0.15 
  -2   0  -2   90.57    1.54 
  -2   0  -2   88.65    1.62 
  -2   0  -2   92.49    1.50 
   2   0   2   89.85    1.59 
  -3   0  -2    1.31    0.19 
  -3   0  -2    0.91    0.12 
   3   0   2    0.58    0.17 
   3   0   2    1.27    0.11 
  -4   0  -2  188.61    3.08 
  -4   0  -2  183.62    3.24 
   4   0   2  183.58    3.00 
   4   0   2  179.24    3.17 
  -5   0  -2   65.97    1.44 
  -5   0  -2   66.09    1.27 
   5   0   2   68.49    1.22 
   5   0   2   65.24    1.42 
  -6   0  -2   80.22    1.75 
  -6   0  -2   80.66    1.54 
   6   0   2   80.58    1.72 
   6   0   2   82.53    1.47 
  -7   0  -2   66.10    1.58 
  -7   0  -2   65.86    1.33 
   7   0   2   63.52    1.55 
   7   0   2   65.81    1.26 
  -8   0  -2   24.68    0.70 
  -8   0  -2   24.02    0.90 
   8   0   2   25.08    0.94 
  -9   0  -2   63.19    1.70 
   9   0   2   68.00    1.72 
 -10   0  -2   25.41    1.07 
  10   0   2   23.91    1.03 
 -11   0  -2   77.29    2.11 
  11   0   2   79.09    2.08 
 -12   0  -2    1.25    0.51 
  12   0   2    1.34    0.52 
 -13   0  -2   20.97    1.15 
  13   0   2   20.82    1.15 
  13  -1  -2   29.07    1.31 
 -13   1   2   27.35    1.29 
  12  -1  -2    7.97    0.79 
 -12   1   2    8.08    0.79 
  11  -1  -2   42.78    1.44 
 -11   1   2   47.37    1.53 
  10  -1  -2    1.22    0.42 
 -10   1   2    0.65    0.35 
   9  -1  -2  195.07    3.73 
  -9   1   2  192.15    3.76 
  -9   1   2  188.85    3.49 
   8  -1  -2    7.17    0.57 
  -8   1   2    6.46    0.45 
  -8   1   2    6.77    0.55 
   7  -1  -2  107.26    1.95 
   7  -1  -2  110.58    2.25 
  -7   1   2  111.29    2.26 
  -7   1   2  106.96    2.09 
   6  -1  -2   17.10    0.66 
   6  -1  -2   15.94    0.47 
  -6   1   2   16.69    0.64 
  -6   1   2   16.09    0.55 
   5  -1  -2  340.08    5.60 
   5  -1  -2  339.27    5.41 
  -5   1   2  328.37    5.55 
  -5   1   2  334.75    5.66 
   4  -1  -2  284.74    4.51 
  -4   1   2  276.80    4.63 
  -4   1   2  275.11    4.69 
   3  -1  -2  195.04    3.23 
   3  -1  -2  194.38    3.14 
  -3   1   2  191.14    3.25 
  -3   1   2  188.34    3.23 
   2  -1  -2   14.41    0.36 
   2  -1  -2   14.76    0.39 
  -2   1   2   13.76    0.37 
  -2   1   2   14.54    0.39 
   1  -1  -2  317.38    4.93 
   1  -1  -2  306.87    4.91 
  -1   1   2  309.41    4.99 
  -1   1   2  306.34    4.94 
   0  -1  -2  208.67    3.32 
   0   1   2  206.09    3.29 
   0   1   2  206.43    3.34 
  -1  -1  -2  185.50    3.00 
  -1  -1  -2  184.95    3.02 
   1   1   2  186.12    3.02 
   1   1   2  187.76    3.00 
  -2  -1  -2   78.28    1.39 
   2   1   2   78.37    1.30 
   2   1   2   78.00    1.34 
   2   1   2   78.42    1.40 
  -3  -1  -2   10.61    0.37 
   3   1   2   10.95    0.26 
   3   1   2   10.70    0.32 
   3   1   2   10.73    0.37 
  -4  -1  -2  124.41    2.05 
  -4  -1  -2  120.14    2.23 
   4   1   2  122.24    2.21 
   4   1   2  123.41    2.09 
  -5  -1  -2    0.08    0.17 
  -5  -1  -2    0.34    0.11 
   5   1   2    0.71    0.14 
   5   1   2    0.24    0.17 
  -6  -1  -2  313.70    5.41 
  -6  -1  -2  319.12    5.13 
   6   1   2  314.48    5.12 
   6   1   2  309.62    5.33 
  -7  -1  -2    2.18    0.22 
  -7  -1  -2    2.48    0.35 
   7   1   2    2.32    0.24 
   7   1   2    2.22    0.33 
  -8  -1  -2  122.12    2.57 
   8   1   2  129.70    2.26 
   8   1   2  120.67    2.53 
  -9  -1  -2    6.74    0.58 
   9   1   2    7.64    0.62 
 -10  -1  -2   55.02    1.57 
  10   1   2   53.91    1.56 
 -11  -1  -2   23.72    1.04 
  11   1   2   25.11    1.05 
 -12  -1  -2   38.45    1.45 
  12   1   2   40.52    1.44 
 -13  -1  -2   21.89    1.15 
  13   1   2   21.09    1.12 
 -13   2   2    9.13    0.91 
  12  -2  -2   14.50    0.98 
 -12   2   2   16.08    1.02 
  11  -2  -2   19.84    1.02 
 -11   2   2   19.19    0.99 
  10  -2  -2   45.63    1.46 
 -10   2   2   45.53    1.46 
   9  -2  -2   88.00    2.10 
  -9   2   2   87.57    1.92 
  -9   2   2   88.74    2.13 
   8  -2  -2   95.50    2.16 
  -8   2   2   97.52    2.01 
  -8   2   2   95.33    2.16 
   7  -2  -2  222.44    4.06 
  -7   2   2  224.48    4.10 
  -7   2   2  217.66    3.92 
   6  -2  -2   12.84    0.59 
  -6   2   2   13.19    0.53 
  -6   2   2   11.94    0.59 
   5  -2  -2  237.74    3.81 
   5  -2  -2  236.36    4.08 
  -5   2   2  233.63    4.03 
  -5   2   2  225.67    4.08 
   4  -2  -2   15.43    0.56 
   4  -2  -2   16.31    0.41 
  -4   2   2   15.20    0.51 
  -4   2   2   15.17    0.55 
   3  -2  -2  589.61    9.08 
  -3   2   2  570.10    9.32 
  -3   2   2  569.27    9.30 
   2  -2  -2   13.40    0.37 
   2  -2  -2   13.16    0.42 
  -2   2   2   13.13    0.39 
  -2   2   2   12.70    0.40 
   1  -2  -2  147.47    2.48 
   1  -2  -2  147.91    2.45 
  -1   2   2  147.23    2.51 
  -1   2   2  151.13    2.46 
   0  -2  -2   27.85    0.56 
   0   2   2   26.54    0.50 
   0   2   2   28.19    0.57 
  -1  -2  -2   72.50    1.27 
  -1  -2  -2   75.02    1.23 
   1   2   2   70.45    1.28 
   1   2   2   74.09    1.24 
  -2  -2  -2    9.86    0.29 
   2   2   2    9.60    0.33 
   2   2   2    9.93    0.31 
   2   2   2   10.18    0.21 
  -3  -2  -2  121.19    2.15 
   3   2   2  126.14    2.11 
   3   2   2  123.15    2.16 
  -4  -2  -2  187.90    3.22 
   4   2   2  185.87    3.19 
   4   2   2  182.40    2.96 
   4   2   2  188.85    3.11 
  -5  -2  -2   63.29    1.07 
  -5  -2  -2   62.90    1.33 
   5   2   2   62.01    1.33 
   5   2   2   62.08    1.22 
  -6  -2  -2  218.22    3.48 
  -6  -2  -2  212.34    3.80 
   6   2   2  213.19    3.60 
   6   2   2  211.50    3.75 
  -7  -2  -2   93.15    1.99 
  -7  -2  -2   96.41    1.66 
   7   2   2   95.37    1.80 
   7   2   2   94.52    1.98 
  -8  -2  -2  205.98    3.86 
   8   2   2  204.70    3.81 
   8   2   2  208.81    3.57 
  -9  -2  -2    5.52    0.52 
   9   2   2    6.33    0.57 
   9   2   2    5.83    0.41 
 -10  -2  -2   74.39    1.89 
  10   2   2   73.61    1.87 
 -11  -2  -2    0.29    0.33 
  11   2   2    0.09    0.36 
 -12  -2  -2   77.57    2.12 
  12   2   2   77.42    2.09 
 -13  -2  -2    2.87    0.61 
  13   2   2    3.34    0.63 
 -12   3   2   38.28    1.50 
  11  -3  -2    0.95    0.45 
 -11   3   2    0.78    0.46 
  10  -3  -2   39.02    1.38 
 -10   3   2   39.58    1.37 
   9  -3  -2    3.30    0.48 
  -9   3   2    1.68    0.43 
  -9   3   2    2.56    0.40 
   8  -3  -2   70.33    1.80 
  -8   3   2   71.67    1.66 
  -8   3   2   71.91    1.79 
   7  -3  -2   26.31    0.97 
  -7   3   2   28.58    0.96 
  -7   3   2   25.41    0.85 
   6  -3  -2  124.32    2.48 
  -6   3   2  121.22    2.45 
  -6   3   2  119.90    2.37 
   5  -3  -2   67.73    1.53 
  -5   3   2   66.90    1.46 
  -5   3   2   69.06    1.52 
   4  -3  -2   57.18    1.28 
   4  -3  -2   57.68    1.03 
  -4   3   2   54.21    1.24 
  -4   3   2   53.70    1.22 
   3  -3  -2  115.60    1.94 
   3  -3  -2  115.68    2.14 
  -3   3   2  112.02    2.12 
  -3   3   2  114.90    2.12 
   2  -3  -2  113.73    2.07 
   2  -3  -2  116.24    1.96 
  -2   3   2  118.72    2.06 
  -2   3   2  111.27    2.08 
   1  -3  -2  852.86   13.24 
   1  -3  -2  833.25   12.97 
  -1   3   2  806.11   13.14 
  -1   3   2  806.25   13.24 
   0  -3  -2   34.89    0.71 
   0   3   2   35.74    0.68 
   0   3   2   34.16    0.74 
  -1  -3  -2  182.81    2.94 
   1   3   2  175.79    2.95 
   1   3   2  173.41    2.93 
   1   3   2  176.08    2.94 
   1   3   2  179.61    2.92 
  -2  -3  -2   45.64    0.87 
   2   3   2   45.41    0.92 
   2   3   2   45.68    0.82 
  -3  -3  -2  982.07   15.81 
   3   3   2 1000.00   15.76 
   3   3   2  957.14   15.53 
   3   3   2  964.69   15.43 
  -4  -3  -2    3.94    0.28 
   4   3   2    4.33    0.28 
   4   3   2    4.03    0.31 
  -5  -3  -2  213.36    3.73 
   5   3   2  216.42    3.71 
   5   3   2  214.88    3.63 
  -6  -3  -2   26.54    0.78 
   6   3   2   27.39    0.71 
   6   3   2   25.70    0.79 
  -7  -3  -2  140.83    2.68 
   7   3   2  137.46    2.51 
   7   3   2  137.39    2.65 
  -8  -3  -2   88.18    1.93 
   8   3   2   86.20    1.92 
   8   3   2   87.69    1.75 
  -9  -3  -2  113.01    2.41 
   9   3   2  112.97    2.18 
   9   3   2  110.91    2.38 
 -10  -3  -2   37.39    1.23 
  10   3   2   37.16    1.00 
  10   3   2   36.91    1.21 
 -11  -3  -2    3.04    0.48 
  11   3   2    2.46    0.45 
 -12  -3  -2   35.31    1.30 
  12   3   2   32.51    1.26 
 -13  -3  -2   16.86    1.01 
  13   3   2   18.19    1.02 
 -14  -3  -2   72.24    2.17 
  14   3   2   71.94    2.14 
  11  -4  -2    3.96    0.66 
 -11   4   2    2.13    0.56 
  10  -4  -2   38.66    1.41 
 -10   4   2   38.35    1.38 
   9  -4  -2    0.57    0.41 
  -9   4   2    0.43    0.33 
  -9   4   2    0.13    0.36 
   8  -4  -2   36.13    1.22 
  -8   4   2   38.04    1.14 
  -8   4   2   35.87    1.22 
   7  -4  -2    4.83    0.50 
  -7   4   2    4.86    0.52 
  -7   4   2    6.14    0.51 
   6  -4  -2  175.76    3.39 
  -6   4   2  175.51    3.39 
  -6   4   2  179.88    3.33 
   5  -4  -2    0.76    0.28 
  -5   4   2    0.73    0.27 
  -5   4   2    0.88    0.27 
   4  -4  -2  130.44    2.49 
  -4   4   2  127.03    2.46 
  -4   4   2  129.88    2.47 
   3  -4  -2    0.88    0.23 
   3  -4  -2    1.41    0.16 
  -3   4   2    1.53    0.24 
  -3   4   2    1.22    0.23 
   2  -4  -2  200.93    3.23 
   2  -4  -2  194.09    3.39 
  -2   4   2  189.67    3.42 
  -2   4   2  199.57    3.40 
   1  -4  -2  183.24    3.01 
   1  -4  -2  182.36    3.12 
  -1   4   2  179.87    3.10 
   0  -4  -2  259.06    4.27 
   0   4   2  271.62    4.33 
   0   4   2  258.86    4.38 
   1   4   2  113.27    1.97 
   1   4   2  113.55    1.94 
   1   4   2  109.68    1.98 
   1   4   2  111.73    1.95 
  -2  -4  -2   79.53    1.43 
   2   4   2   77.12    1.45 
   2   4   2   78.59    1.47 
   2   4   2   79.69    1.41 
  -3  -4  -2  105.99    1.93 
   3   4   2  106.13    1.95 
   3   4   2  112.61    1.83 
   3   4   2  108.29    1.95 
  -4  -4  -2   63.74    1.28 
  -4  -4  -2   64.37    1.08 
   4   4   2   64.92    1.33 
   4   4   2   63.80    1.29 
  -5  -4  -2  393.53    6.57 
   5   4   2  390.68    6.46 
   5   4   2  402.03    6.53 
  -6  -4  -2    2.81    0.31 
   6   4   2    2.76    0.27 
   6   4   2    3.17    0.32 
  -7  -4  -2   94.02    1.95 
   7   4   2   94.28    1.95 
   7   4   2   92.18    1.84 
  -8  -4  -2    1.91    0.33 
   8   4   2    2.13    0.29 
   8   4   2    1.86    0.34 
  -9  -4  -2  152.86    3.06 
   9   4   2  156.79    2.87 
   9   4   2  151.16    3.04 
 -10  -4  -2    3.62    0.48 
  10   4   2    3.25    0.47 
  10   4   2    2.78    0.36 
 -11  -4  -2   69.37    1.85 
  11   4   2   70.33    1.61 
  11   4   2   68.12    1.83 
 -12  -4  -2    9.21    0.69 
  12   4   2    7.35    0.71 
 -13  -4  -2   40.31    1.48 
  13   4   2   42.89    1.50 
 -14  -4  -2   23.51    1.17 
  14   4   2   23.17    1.18 
  10  -5  -2   38.24    1.42 
 -10   5   2   36.95    1.29 
   9  -5  -2   14.66    0.89 
  -9   5   2   16.44    0.92 
  -9   5   2   15.30    0.82 
   8  -5  -2   17.26    0.87 
  -8   5   2   16.71    0.81 
  -8   5   2   16.49    0.85 
   7  -5  -2    9.46    0.67 
  -7   5   2    9.57    0.64 
  -7   5   2    8.59    0.59 
   6  -5  -2   57.51    1.52 
  -6   5   2   54.26    1.43 
  -6   5   2   57.11    1.48 
   5  -5  -2   49.62    1.34 
  -5   5   2   49.49    1.31 
  -5   5   2   49.84    1.29 
   4  -5  -2  148.88    2.87 
  -4   5   2  153.75    2.90 
  -4   5   2  149.58    2.88 
   3  -5  -2    2.01    0.28 
  -3   5   2    2.25    0.30 
  -3   5   2    2.50    0.30 
   2  -5  -2   24.59    0.59 
   2  -5  -2   23.46    0.71 
  -2   5   2   23.10    0.72 
  -2   5   2   24.36    0.71 
   1  -5  -2    6.56    0.29 
   1  -5  -2    5.69    0.34 
  -1   5   2    5.92    0.35 
  -1   5   2    6.33    0.34 
   0  -5  -2  374.75    6.21 
   0  -5  -2  373.15    6.11 
   0   5   2  384.19    6.29 
   0   5   2  389.41    6.23 
  -1  -5  -2   41.62    0.89 
   1   5   2   41.67    0.90 
   1   5   2   41.25    0.93 
   1   5   2   43.05    0.93 
   1   5   2   43.56    0.89 
   2   5   2  111.93    2.00 
   2   5   2  110.94    1.98 
   2   5   2  111.76    1.98 
   2   5   2  109.98    2.01 
  -3  -5  -2  125.10    2.21 
   3   5   2  121.57    2.22 
   3   5   2  127.58    2.14 
   3   5   2  121.37    2.23 
  -4  -5  -2   85.58    1.64 
   4   5   2   85.70    1.49 
   4   5   2   85.43    1.67 
   4   5   2   86.09    1.67 
  -5  -5  -2  151.59    2.80 
  -5  -5  -2  159.14    2.55 
   5   5   2  156.21    2.80 
   5   5   2  157.07    2.83 
  -6  -5  -2   71.90    1.52 
   6   5   2   70.28    1.48 
   6   5   2   69.97    1.54 
  -7  -5  -2   54.42    1.28 
   7   5   2   51.87    1.22 
   7   5   2   50.54    1.29 
  -8  -5  -2    5.81    0.48 
   8   5   2    5.39    0.42 
   8   5   2    5.68    0.49 
  -9  -5  -2   89.51    2.02 
   9   5   2   86.19    2.00 
   9   5   2   91.81    1.90 
 -10  -5  -2   47.16    1.36 
  10   5   2   47.77    1.25 
  10   5   2   46.20    1.37 
 -11  -5  -2   55.90    1.59 
  11   5   2   56.28    1.60 
  11   5   2   55.65    1.42 
 -12  -5  -2    3.92    0.57 
  12   5   2    4.43    0.57 
  12   5   2    4.03    0.49 
 -13  -5  -2   30.82    1.26 
  13   5   2   29.74    1.23 
 -14  -5  -2    0.75    0.50 
  14   5   2    0.48    0.47 
 -10   6   2    0.41    0.44 
   9  -6  -2   45.33    1.59 
  -9   6   2   48.45    1.50 
   8  -6  -2    6.01    0.65 
  -8   6   2    6.60    0.63 
  -8   6   2    6.39    0.67 
   7  -6  -2   30.78    1.14 
  -7   6   2   30.27    1.13 
  -7   6   2   31.81    1.11 
   6  -6  -2   10.80    0.67 
  -6   6   2   10.98    0.66 
  -6   6   2   11.02    0.66 
   5  -6  -2   21.00    0.87 
  -5   6   2   21.45    0.84 
  -5   6   2   19.75    0.82 
   4  -6  -2   44.61    1.23 
  -4   6   2   45.50    1.23 
  -4   6   2   47.49    1.25 
   3  -6  -2   22.56    0.79 
  -3   6   2   24.19    0.79 
  -3   6   2   22.69    0.79 
   2  -6  -2  106.86    2.12 
  -2   6   2  109.97    2.11 
  -2   6   2  103.31    2.14 
   1  -6  -2    1.41    0.19 
   1  -6  -2    1.53    0.26 
  -1   6   2    1.70    0.24 
  -1   6   2    1.76    0.28 
   0  -6  -2  154.23    2.64 
   0  -6  -2  155.81    2.76 
   0   6   2  149.90    2.79 
   0   6   2  152.22    2.72 
  -1  -6  -2    1.34    0.20 
   1   6   2    1.52    0.23 
   1   6   2    1.89    0.22 
   1   6   2    1.24    0.20 
   2   6   2  441.35    7.17 
   2   6   2  434.63    7.10 
   2   6   2  440.55    7.11 
   2   6   2  433.30    7.17 
  -3  -6  -2    0.38    0.16 
   3   6   2    0.73    0.17 
   3   6   2    0.40    0.18 
   3   6   2    0.33    0.17 
  -4  -6  -2   83.84    1.65 
   4   6   2   85.14    1.69 
   4   6   2   83.34    1.66 
   4   6   2   83.92    1.54 
  -5  -6  -2   12.81    0.37 
  -5  -6  -2   12.49    0.50 
   5   6   2   11.80    0.50 
   5   6   2   12.11    0.52 
  -6  -6  -2  158.30    2.96 
   6   6   2  160.15    2.95 
   6   6   2  163.65    2.98 
  -7  -6  -2    3.87    0.37 
   7   6   2    3.26    0.34 
   7   6   2    3.72    0.40 
  -8  -6  -2   62.83    1.52 
   8   6   2   66.00    1.51 
   8   6   2   66.11    1.58 
  -9  -6  -2   25.24    0.92 
   9   6   2   26.23    0.95 
   9   6   2   25.05    0.86 
 -10  -6  -2   31.19    1.08 
  10   6   2   32.32    1.02 
  10   6   2   33.67    1.12 
 -11  -6  -2   35.14    1.21 
  11   6   2   37.10    1.25 
  11   6   2   37.65    1.14 
 -12  -6  -2   16.55    0.92 
  12   6   2   18.49    0.82 
  12   6   2   18.00    0.93 
 -13  -6  -2   28.24    1.16 
  13   6   2   27.76    1.03 
  13   6   2   26.11    1.17 
 -14  -6  -2    0.84    0.49 
  14   6   2    0.61    0.49 
  15   6   2    9.81    0.93 
  -9   7   2   34.01    1.31 
   8  -7  -2    0.45    0.47 
  -8   7   2    0.72    0.44 
   7  -7  -2   45.96    1.49 
  -7   7   2   44.92    1.43 
   6  -7  -2   11.48    0.72 
  -6   7   2   11.63    0.73 
  -6   7   2   11.05    0.73 
   5  -7  -2   10.59    0.70 
  -5   7   2   12.90    0.71 
  -5   7   2   12.66    0.68 
   4  -7  -2   10.24    0.64 
  -4   7   2    9.85    0.63 
  -4   7   2   10.83    0.64 
   3  -7  -2   51.14    1.35 
  -3   7   2   49.67    1.33 
  -3   7   2   52.02    1.33 
   2  -7  -2   41.87    1.15 
  -2   7   2   43.02    1.18 
  -2   7   2   44.23    1.13 
   1  -7  -2   36.85    1.01 
  -1   7   2   36.58    0.96 
  -1   7   2   35.38    1.01 
   0  -7  -2   83.67    1.58 
   0  -7  -2   81.95    1.71 
   0   7   2   81.15    1.66 
   0   7   2   82.49    1.75 
  -1  -7  -2   43.81    1.01 
   1   7   2   45.39    1.05 
   1   7   2   46.42    1.12 
   1   7   2   47.13    1.11 
   2   7   2   92.56    1.79 
   2   7   2   90.56    1.82 
   2   7   2   91.73    1.79 
   2   7   2   94.11    1.83 
   3   7   2   74.09    1.49 
   3   7   2   72.46    1.51 
   3   7   2   70.93    1.46 
   3   7   2   73.31    1.51 
  -4  -7  -2  188.96    3.40 
   4   7   2  196.46    3.32 
   4   7   2  187.41    3.37 
   4   7   2  196.63    3.43 
  -5  -7  -2    0.75    0.16 
  -5  -7  -2    0.46    0.20 
   5   7   2    1.01    0.25 
   5   7   2    0.80    0.23 
  -6  -7  -2  102.65    2.07 
   6   7   2  104.27    2.09 
   6   7   2  103.06    2.07 
  -7  -7  -2   24.78    0.80 
   7   7   2   24.17    0.83 
   7   7   2   23.71    0.83 
  -8  -7  -2  181.86    3.49 
   8   7   2  182.51    3.45 
   8   7   2  192.39    3.52 
  -9  -7  -2   19.90    0.83 
   9   7   2   22.25    0.82 
   9   7   2   22.85    0.89 
 -10  -7  -2   56.12    1.54 
  10   7   2   56.44    1.46 
  10   7   2   57.59    1.56 
 -11  -7  -2   11.81    0.75 
  11   7   2   11.96    0.68 
  11   7   2   13.51    0.77 
 -12  -7  -2   34.56    1.28 
  12   7   2   36.93    1.31 
  12   7   2   36.17    1.19 
 -13  -7  -2    6.44    0.71 
  13   7   2    6.86    0.71 
  13   7   2    6.73    0.62 
 -14  -7  -2    4.47    0.67 
  14   7   2    4.38    0.56 
  14   7   2    3.73    0.62 
  15   7   2   13.46    0.99 
   7  -8  -2   54.33    1.71 
  -7   8   2   55.20    1.66 
   6  -8  -2    3.92    0.58 
  -6   8   2    4.02    0.57 
   5  -8  -2   61.00    1.69 
  -5   8   2   58.86    1.66 
   4  -8  -2    3.71    0.49 
  -4   8   2    3.46    0.46 
  -4   8   2    2.94    0.47 
   3  -8  -2   65.04    1.67 
  -3   8   2   70.00    1.74 
  -3   8   2   70.19    1.66 
   2  -8  -2   -0.09    0.24 
  -2   8   2    0.20    0.30 
  -2   8   2    0.19    0.25 
   1  -8  -2  174.91    3.26 
  -1   8   2  173.68    3.22 
  -1   8   2  173.43    3.34 
   0  -8  -2   35.49    1.02 
   0   8   2   36.81    1.07 
   0   8   2   36.78    0.97 
  -1  -8  -2   39.92    1.05 
  -1  -8  -2   40.30    0.99 
   1   8   2   41.03    1.10 
   1   8   2   42.63    1.04 
   2   8   2   26.83    0.83 
   2   8   2   27.39    0.79 
   2   8   2   27.28    0.79 
   2   8   2   27.64    0.82 
   3   8   2  115.41    2.23 
   3   8   2  112.69    2.22 
   3   8   2  114.01    2.23 
   3   8   2  118.83    2.24 
  -4  -8  -2   47.51    1.14 
   4   8   2   48.36    1.10 
   4   8   2   45.80    1.14 
   4   8   2   49.55    1.19 
  -5  -8  -2   23.25    0.76 
  -5  -8  -2   24.14    0.67 
   5   8   2   24.14    0.76 
   5   8   2   23.78    0.78 
  -6  -8  -2  115.62    2.34 
   6   8   2  119.67    2.33 
   6   8   2  117.51    2.37 
  -7  -8  -2   59.91    1.45 
   7   8   2   59.09    1.47 
   7   8   2   62.10    1.46 
  -8  -8  -2  145.08    2.92 
   8   8   2  153.51    2.93 
   8   8   2  146.50    2.92 
  -9  -8  -2   14.65    0.70 
   9   8   2   13.77    0.72 
   9   8   2   14.23    0.69 
 -10  -8  -2   45.47    1.35 
  10   8   2   43.89    1.31 
  10   8   2   46.85    1.37 
 -11  -8  -2    1.16    0.38 
  11   8   2    1.43    0.39 
  11   8   2    1.69    0.44 
 -12  -8  -2   50.17    1.55 
  12   8   2   46.06    1.43 
  12   8   2   50.41    1.57 
 -13  -8  -2   -0.28    0.40 
  13   8   2    0.51    0.39 
  13   8   2    0.64    0.46 
 -14  -8  -2   24.80    1.21 
  14   8   2   27.57    1.24 
  14   8   2   25.03    1.08 
  -7   9   2    4.47    0.68 
   6  -9  -2   51.08    1.65 
  -6   9   2   51.39    1.62 
   5  -9  -2   21.67    0.99 
  -5   9   2   21.50    1.02 
   4  -9  -2   15.03    0.83 
  -4   9   2   13.86    0.82 
   3  -9  -2   65.79    1.70 
  -3   9   2   65.42    1.75 
   2  -9  -2   12.23    0.69 
  -2   9   2   12.05    0.63 
  -2   9   2   10.43    0.65 
   1  -9  -2  105.41    2.26 
  -1   9   2  108.27    2.34 
  -1   9   2  107.01    2.22 
   0  -9  -2    3.88    0.43 
   0   9   2    4.46    0.47 
   0   9   2    4.46    0.42 
  -1  -9  -2  141.64    2.62 
  -1  -9  -2  140.43    2.74 
   1   9   2  141.21    2.81 
   1   9   2  144.43    2.73 
  -2  -9  -2   13.02    0.58 
   2   9   2   13.43    0.61 
   2   9   2   11.50    0.60 
   2   9   2   13.92    0.61 
   3   9   2  172.98    3.18 
   3   9   2  172.20    3.20 
   3   9   2  168.65    3.18 
   3   9   2  177.93    3.22 
  -4  -9  -2    1.75    0.29 
   4   9   2    1.30    0.30 
   4   9   2    0.97    0.29 
   4   9   2    1.13    0.29 
  -5  -9  -2  149.60    2.90 
  -5  -9  -2  153.48    2.80 
   5   9   2  153.99    2.94 
   5   9   2  156.15    2.90 
  -6  -9  -2   44.26    1.19 
   6   9   2   45.22    1.17 
   6   9   2   44.53    1.21 
  -7  -9  -2   66.86    1.61 
   7   9   2   67.62    1.64 
   7   9   2   71.40    1.62 
  -8  -9  -2   46.30    1.26 
   8   9   2   46.59    1.25 
   8   9   2   43.11    1.28 
  -9  -9  -2   41.58    1.27 
   9   9   2   45.33    1.28 
   9   9   2   43.83    1.28 
 -10  -9  -2   10.03    0.67 
  10   9   2    9.25    0.66 
  10   9   2   11.38    0.69 
 -11  -9  -2   12.29    0.73 
  11   9   2   10.63    0.68 
  11   9   2   11.12    0.76 
 -12  -9  -2   37.63    1.33 
  12   9   2   35.27    1.25 
  12   9   2   35.01    1.28 
 -13  -9  -2    7.35    0.73 
  13   9   2    7.81    0.71 
 -14  -9  -2   33.11    1.38 
  14   9   2   32.70    1.27 
   5 -10  -2    2.08    0.53 
  -5  10   2    0.59    0.43 
   4 -10  -2   56.65    1.66 
  -4  10   2   53.94    1.67 
   3 -10  -2   28.97    1.11 
  -3  10   2   27.93    1.14 
   2 -10  -2   52.98    1.48 
  -2  10   2   48.00    1.49 
   1 -10  -2   39.95    1.22 
  -1  10   2   39.96    1.26 
   0 -10  -2   63.15    1.58 
   0  10   2   62.60    1.52 
  -1 -10  -2   66.22    1.61 
   1  10   2   68.24    1.59 
   1  10   2   67.31    1.68 
  -2 -10  -2   31.64    0.99 
  -2 -10  -2   31.92    0.94 
   2  10   2   31.42    1.03 
   2  10   2   32.36    0.97 
   3  10   2  145.05    2.82 
   3  10   2  144.35    2.81 
   3  10   2  145.51    2.79 
   3  10   2  146.85    2.86 
  -4 -10  -2   16.87    0.70 
   4  10   2   17.52    0.70 
   4  10   2   16.08    0.70 
   4  10   2   17.63    0.72 
  -5 -10  -2   81.62    1.81 
   5  10   2   79.80    1.78 
   5  10   2   82.98    1.86 
  -6 -10  -2    9.75    0.58 
   6  10   2   10.16    0.62 
   6  10   2   10.42    0.59 
  -7 -10  -2  108.76    2.33 
   7  10   2  111.62    2.29 
   7  10   2  109.29    2.37 
  -8 -10  -2   10.36    0.63 
   8  10   2   11.09    0.62 
   8  10   2   11.01    0.65 
  -9 -10  -2   48.45    1.39 
   9  10   2   47.62    1.40 
   9  10   2   47.73    1.35 
 -10 -10  -2    5.43    0.57 
  10  10   2    5.67    0.56 
  10  10   2    5.14    0.57 
 -11 -10  -2   70.78    1.88 
  11  10   2   70.16    1.88 
 -12 -10  -2   16.61    0.93 
  12  10   2   14.97    0.88 
 -13 -10  -2   21.11    1.07 
  13  10   2   21.85    1.05 
   4 -11  -2   28.00    1.22 
  -4  11   2   28.37    1.22 
   3 -11  -2    3.80    0.58 
  -3  11   2    2.38    0.54 
   2 -11  -2   62.20    1.71 
  -2  11   2   58.92    1.74 
   1 -11  -2    2.88    0.48 
  -1  11   2    4.33    0.57 
   0 -11  -2   51.39    1.45 
   0  11   2   50.82    1.51 
  -1 -11  -2    3.47    0.46 
   1  11   2    3.14    0.48 
  -2 -11  -2  102.15    2.23 
   2  11   2  104.70    2.24 
   2  11   2  104.58    2.32 
  -3 -11  -2   24.84    0.88 
   3  11   2   22.60    0.90 
   3  11   2   24.63    0.87 
  -4 -11  -2   53.04    1.39 
   4  11   2   54.55    1.39 
   4  11   2   53.11    1.39 
   4  11   2   53.07    1.40 
   4  11   2   54.38    1.41 
  -5 -11  -2   25.82    0.93 
   5  11   2   26.51    0.91 
   5  11   2   25.62    0.94 
  -6 -11  -2   42.31    1.23 
   6  11   2   42.79    1.26 
   6  11   2   45.48    1.23 
  -7 -11  -2   35.01    1.12 
   7  11   2   35.58    1.08 
   7  11   2   33.80    1.15 
  -8 -11  -2    8.43    0.61 
   8  11   2    9.07    0.59 
   8  11   2    7.57    0.64 
  -9 -11  -2   61.45    1.65 
   9  11   2   61.40    1.69 
 -10 -11  -2    7.79    0.67 
  10  11   2    5.56    0.62 
 -11 -11  -2   82.80    2.14 
  11  11   2   85.90    2.18 
 -12 -11  -2    1.17    0.47 
  12  11   2    0.76    0.47 
 -13 -11  -2   38.56    1.45 
  13  11   2   35.85    1.38 
   3 -12  -2   20.72    1.07 
   2 -12  -2   20.08    1.02 
  -2  12   2   17.20    1.00 
   1 -12  -2    8.05    0.70 
  -1  12   2    8.00    0.73 
   0 -12  -2   39.53    1.29 
   0  12   2   39.40    1.35 
  -1 -12  -2    2.61    0.46 
   1  12   2    3.44    0.53 
  -2 -12  -2   77.10    1.87 
   2  12   2   74.63    1.93 
  -3 -12  -2    1.41    0.39 
   3  12   2    2.20    0.44 
  -4 -12  -2   62.60    1.60 
   4  12   2   67.19    1.68 
   4  12   2   63.47    1.63 
  -5 -12  -2    0.86    0.36 
   5  12   2    1.73    0.38 
   5  12   2    0.70    0.35 
  -6 -12  -2   39.99    1.23 
   6  12   2   40.11    1.26 
  -7 -12  -2    2.59    0.43 
   7  12   2    1.82    0.44 
  -8 -12  -2   60.28    1.63 
   8  12   2   60.13    1.69 
  -9 -12  -2   29.73    1.11 
   9  12   2   27.12    1.12 
 -10 -12  -2   21.20    0.97 
  10  12   2   19.68    0.98 
 -11 -12  -2   33.11    1.27 
  11  12   2   36.37    1.34 
 -12 -12  -2   20.25    1.05 
  12  12   2   19.55    1.05 
   2 -13  -2    0.19    0.44 
   1 -13  -2   28.39    1.18 
  -1  13   2   25.38    1.21 
   0 -13  -2   15.12    0.87 
   0  13   2   16.23    0.97 
  -1 -13  -2   17.88    0.92 
   1  13   2   20.41    1.02 
   2  13   2   28.70    1.17 
   3  13   2   15.79    0.88 
   6  13   2   49.77    1.49 
  -7 -13  -2   -0.01    0.34 
   7  13   2    0.80    0.42 
  -8 -13  -2   40.16    1.32 
   8  13   2   43.05    1.41 
  -9 -13  -2    1.00    0.42 
   9  13   2    0.55    0.44 
 -10 -13  -2   32.20    1.24 
  10  13   2   32.40    1.26 
 -11 -13  -2   21.79    1.07 
  11  13   2   23.26    1.14 
 -12 -13  -2   14.89    0.95 
   1  14   2   34.39    1.40 
   2  14   2    9.46    0.86 
  -3 -14  -2   13.36    0.86 
   7  14   2    4.60    0.62 
   8  14   2   29.07    1.22 
   9  14   2    1.49    0.48 
 -10 -14  -2   30.86    1.23 
 -11 -14  -2    0.47    0.46 
   8  15   2   11.38    0.92 
   9  14  -3   20.93    1.09 
   8  14  -3    0.93    0.48 
  -8 -14   3    1.62    0.53 
  -7 -14   3   54.84    1.76 
  -6 -14   3   11.43    0.86 
   5  14  -3   26.38    1.19 
   4  14  -3   16.77    1.00 
   3  14  -3   20.48    1.09 
  -3 -14   3   21.69    1.12 
   2  14  -3   15.37    0.99 
  10  13  -3   28.11    1.22 
 -10 -13   3   23.30    1.15 
   9  13  -3   27.16    1.18 
  -9 -13   3   29.62    1.26 
   8  13  -3    9.07    0.77 
  -8 -13   3    8.67    0.78 
   7  13  -3   47.89    1.50 
  -7 -13   3   47.79    1.57 
  -6 -13   3    2.55    0.53 
   5  13  -3   58.30    1.75 
   4  13  -3   -0.42    0.38 
  -4 -13   3   -0.44    0.39 
   3  13  -3   45.21    1.54 
  -3 -13   3   46.41    1.54 
   2  13  -3    2.11    0.53 
  -2 -13   3    3.19    0.56 
   1  13  -3   59.36    1.81 
  -1 -13   3   54.69    1.79 
   0  13  -3    5.73    0.72 
  11  12  -3    2.06    0.55 
 -11 -12   3    1.85    0.52 
  10  12  -3   41.94    1.47 
 -10 -12   3   43.00    1.48 
   9  12  -3   14.62    0.87 
  -9 -12   3   13.30    0.87 
   8  12  -3   46.69    1.47 
  -8 -12   3   46.94    1.52 
   7  12  -3   22.52    0.97 
  -7 -12   3   20.20    0.99 
   6  12  -3   24.68    1.01 
  -6 -12   3   24.97    1.06 
   5  12  -3   40.96    1.37 
   4  12  -3   53.99    1.61 
  -4 -12   3   53.18    1.57 
   3  12  -3   68.57    1.87 
  -3 -12   3   65.98    1.84 
   2  12  -3    7.98    0.72 
  -2 -12   3    8.89    0.76 
   1  12  -3   47.72    1.53 
  -1 -12   3   45.39    1.52 
   0  12  -3    2.29    0.53 
   0 -12   3    1.65    0.51 
  -1  12  -3   64.99    1.91 
   1 -12   3   60.21    1.86 
  -2  12  -3    2.94    0.61 
  12  11  -3   28.69    1.24 
 -12 -11   3   29.00    1.27 
  11  11  -3    2.74    0.51 
 -11 -11   3    3.40    0.57 
  10  11  -3   50.58    1.56 
 -10 -11   3   48.74    1.58 
   9  11  -3    2.06    0.44 
  -9 -11   3    2.50    0.49 
   8  11  -3  109.16    2.45 
  -8 -11   3  105.94    2.51 
   7  11  -3    0.17    0.34 
  -7 -11   3    0.91    0.36 
   6  11  -3   45.96    1.32 
  -6 -11   3   41.18    1.35 
   5  11  -3    7.36    0.64 
   5  11  -3    7.72    0.60 
  -5 -11   3    7.15    0.59 
   4  11  -3   87.79    2.14 
  -4 -11   3   88.94    2.09 
   3  11  -3   17.18    0.86 
  -3 -11   3   18.66    0.87 
   2  11  -3   64.13    1.76 
  -2 -11   3   65.76    1.77 
   1  11  -3   48.26    1.49 
  -1 -11   3   45.71    1.44 
   0  11  -3    9.30    0.76 
   0 -11   3    8.15    0.73 
  -1  11  -3   31.61    1.25 
   1 -11   3   31.94    1.25 
  -2  11  -3   21.61    1.08 
   2 -11   3   20.34    1.01 
  -3  11  -3   33.97    1.36 
   3 -11   3   33.87    1.35 
  -4  11  -3    0.47    0.49 
  13  10  -3   35.23    1.37 
 -13 -10   3   36.24    1.44 
  12  10  -3   13.25    0.86 
 -12 -10   3   12.73    0.88 
  11  10  -3   30.81    1.19 
 -11 -10   3   30.23    1.20 
  10  10  -3   30.45    1.16 
 -10 -10   3   29.69    1.16 
   9  10  -3   10.52    0.71 
  -9 -10   3   12.34    0.75 
   8  10  -3   40.28    1.29 
  -8 -10   3   43.09    1.35 
   7  10  -3   61.68    1.61 
  -7 -10   3   61.79    1.67 
   6  10  -3   64.68    1.61 
  -6 -10   3   64.49    1.69 
   5  10  -3    5.80    0.51 
   5  10  -3    6.28    0.56 
  -5 -10   3    6.42    0.54 
   4  10  -3   50.36    1.28 
   4  10  -3   47.04    1.37 
  -4 -10   3   48.03    1.35 
   3  10  -3    3.36    0.39 
   3  10  -3    3.30    0.45 
  -3 -10   3    3.45    0.46 
   2  10  -3   86.48    2.05 
  -2 -10   3   83.17    2.01 
   1  10  -3    0.80    0.36 
  -1 -10   3    1.00    0.37 
   0  10  -3   62.47    1.69 
   0 -10   3   62.38    1.69 
  -1  10  -3   12.50    0.79 
   1 -10   3   13.27    0.79 
  -2  10  -3   57.46    1.68 
   2 -10   3   54.46    1.65 
  -3  10  -3   23.48    1.08 
  -3  10  -3   21.77    1.06 
   3 -10   3   21.48    0.95 
   3 -10   3   23.65    1.07 
  -4  10  -3   22.38    1.10 
  -4  10  -3   21.93    1.10 
   4 -10   3   22.75    1.03 
   4 -10   3   22.77    1.09 
  -5  10  -3   23.63    1.19 
   5 -10   3   26.51    1.15 
  13   9  -3   30.21    1.23 
 -13  -9   3   28.70    1.23 
  12   9  -3   -0.21    0.37 
 -12  -9   3   -0.16    0.34 
  11   9  -3   54.14    1.57 
 -11  -9   3   54.46    1.64 
  10   9  -3    6.29    0.60 
 -10  -9   3    5.98    0.62 
   9   9  -3   57.71    1.54 
  -9  -9   3   53.53    1.56 
   8   9  -3   13.66    0.72 
  -8  -9   3   12.89    0.73 
   7   9  -3   90.24    2.01 
  -7  -9   3   87.27    2.06 
   6   9  -3   17.24    0.74 
  -6  -9   3   17.13    0.71 
  -6  -9   3   17.38    0.79 
   5   9  -3   45.44    1.30 
   5   9  -3   45.63    1.22 
  -5  -9   3   46.46    1.22 
   4   9  -3   24.59    0.88 
   4   9  -3   22.47    0.80 
  -4  -9   3   22.44    0.83 
   3   9  -3   10.10    0.58 
   3   9  -3   10.30    0.53 
  -3  -9   3    9.78    0.56 
   2   9  -3   34.07    0.91 
   2   9  -3   30.10    1.04 
  -2  -9   3   31.91    1.05 
   1   9  -3   20.01    0.82 
  -1  -9   3   19.87    0.84 
   0   9  -3   64.10    1.67 
   0  -9   3   60.84    1.62 
   0  -9   3   63.44    1.46 
  -1   9  -3    3.92    0.51 
  -1   9  -3    2.83    0.46 
   1  -9   3    3.18    0.40 
   1  -9   3    3.58    0.48 
  -2   9  -3   67.75    1.82 
  -2   9  -3   70.45    1.86 
   2  -9   3   69.73    1.67 
  -3   9  -3    0.37    0.39 
  -3   9  -3    0.62    0.39 
   3  -9   3    0.55    0.36 
  -4   9  -3   55.33    1.72 
  -4   9  -3   59.23    1.72 
   4  -9   3   54.90    1.57 
  -5   9  -3   12.97    0.87 
  -5   9  -3   14.30    0.92 
   5  -9   3   13.30    0.84 
  -6   9  -3   28.51    1.28 
  -6   9  -3   25.10    1.15 
   6  -9   3   26.87    1.20 
  -7   9  -3   20.16    1.15 
  14   8  -3   21.76    1.07 
  13   8  -3   31.66    1.24 
 -13  -8   3   32.78    1.33 
  12   8  -3    7.61    0.69 
 -12  -8   3    6.08    0.67 
  11   8  -3   33.65    1.18 
 -11  -8   3   32.39    1.21 
  10   8  -3   14.69    0.77 
 -10  -8   3   14.47    0.77 
   9   8  -3  111.80    2.43 
  -9  -8   3  112.23    2.48 
   8   8  -3    0.84    0.30 
  -8  -8   3    1.18    0.35 
   7   8  -3   32.23    1.03 
  -7  -8   3   33.99    1.07 
   6   8  -3    7.86    0.49 
  -6  -8   3    8.20    0.55 
  -6  -8   3    7.31    0.49 
   5   8  -3   76.25    1.71 
   5   8  -3   81.44    1.82 
  -5  -8   3   78.31    1.70 
   4   8  -3   11.82    0.55 
   4   8  -3   11.79    0.59 
  -4  -8   3   12.34    0.58 
   3   8  -3   33.45    0.92 
   3   8  -3   33.50    1.03 
  -3  -8   3   33.10    0.99 
   2   8  -3   34.46    0.91 
   2   8  -3   34.05    1.05 
  -2  -8   3   34.67    0.87 
  -2  -8   3   36.05    1.05 
   1   8  -3   14.48    0.53 
   1   8  -3   13.54    0.65 
  -1  -8   3   14.48    0.66 
  -1  -8   3   14.48    0.56 
   0   8  -3   30.94    1.03 
   0  -8   3   32.68    0.90 
   0  -8   3   29.03    0.99 
  -1   8  -3   69.20    1.75 
  -1   8  -3   73.50    1.78 
   1  -8   3   69.92    1.59 
  -2   8  -3   71.68    1.79 
  -2   8  -3   71.33    1.81 
   2  -8   3   68.80    1.62 
  -3   8  -3    0.41    0.36 
  -3   8  -3    1.06    0.35 
   3  -8   3    1.27    0.36 
  -4   8  -3   37.65    1.32 
  -4   8  -3   37.26    1.25 
   4  -8   3   36.06    1.18 
  -5   8  -3    8.70    0.73 
  -5   8  -3    7.99    0.75 
   5  -8   3    8.57    0.70 
  -6   8  -3   47.80    1.60 
  -6   8  -3   44.07    1.47 
   6  -8   3   46.68    1.49 
  -7   8  -3    1.66    0.50 
  -7   8  -3    2.83    0.59 
   7  -8   3    2.57    0.57 
  14   7  -3   36.03    1.30 
 -14  -7   3   30.97    1.36 
  13   7  -3   13.83    0.83 
 -13  -7   3   15.74    0.94 
  12   7  -3   25.58    1.04 
 -12  -7   3   27.33    1.12 
  11   7  -3   22.77    0.94 
 -11  -7   3   21.37    0.95 
  10   7  -3   33.67    1.12 
 -10  -7   3   37.03    1.21 
   9   7  -3   67.84    1.65 
  -9  -7   3   65.41    1.68 
   8   7  -3   46.69    1.28 
  -8  -7   3   48.56    1.34 
   7   7  -3  155.52    3.04 
  -7  -7   3  163.07    3.13 
   6   7  -3    0.42    0.18 
   6   7  -3    0.70    0.26 
  -6  -7   3    0.44    0.26 
  -6  -7   3    0.38    0.23 
   5   7  -3  115.29    1.99 
   5   7  -3  112.69    2.28 
   5   7  -3  106.54    2.19 
  -5  -7   3  108.58    2.27 
  -5  -7   3  113.72    2.18 
   4   7  -3   25.97    0.77 
   4   7  -3   26.48    0.65 
   4   7  -3   25.43    0.83 
  -4  -7   3   25.96    0.79 
   3   7  -3  145.58    2.65 
   3   7  -3  141.04    2.79 
  -3  -7   3  148.79    2.76 
  -3  -7   3  146.42    2.51 
   2   7  -3   41.77    1.13 
   2   7  -3   42.34    0.99 
  -2  -7   3   42.83    1.11 
  -2  -7   3   42.07    0.93 
   1   7  -3   45.18    1.00 
   1   7  -3   42.78    1.17 
  -1  -7   3   43.93    1.00 
  -1  -7   3   45.37    1.18 
   0   7  -3   35.60    1.07 
   0  -7   3   37.46    1.08 
   0  -7   3   37.48    0.93 
  -1   7  -3   51.36    1.37 
  -1   7  -3   50.66    1.36 
   1  -7   3   52.01    1.22 
  -2   7  -3   23.99    0.91 
  -2   7  -3   24.54    0.93 
   2  -7   3   25.20    0.83 
  -3   7  -3   19.56    0.84 
  -3   7  -3   19.60    0.87 
   3  -7   3   20.15    0.79 
  -4   7  -3   42.61    1.37 
  -4   7  -3   45.26    1.32 
   4  -7   3   42.91    1.25 
  -5   7  -3   31.26    1.21 
  -5   7  -3   33.70    1.15 
   5  -7   3   33.73    1.15 
  -6   7  -3   29.45    1.13 
  -6   7  -3   28.19    1.19 
   6  -7   3   29.47    1.12 
  -7   7  -3   12.65    0.88 
  -7   7  -3   11.35    0.79 
   7  -7   3   13.19    0.85 
  -8   7  -3   35.52    1.45 
  -8   7  -3   36.69    1.35 
   8  -7   3   35.96    1.39 
  14   6  -3   44.07    1.41 
 -14  -6   3   41.68    1.55 
  13   6  -3    2.85    0.49 
 -13  -6   3    2.23    0.50 
  12   6  -3   95.94    2.21 
 -12  -6   3   96.51    2.38 
  11   6  -3   16.05    0.78 
 -11  -6   3   18.23    0.86 
  10   6  -3   50.29    1.36 
 -10  -6   3   47.56    1.42 
   9   6  -3   10.44    0.57 
   9   6  -3    9.89    0.60 
  -9  -6   3   11.06    0.66 
   8   6  -3  111.73    2.31 
  -8  -6   3  112.68    2.37 
   7   6  -3   22.81    0.68 
   7   6  -3   21.11    0.75 
  -7  -6   3   21.94    0.81 
   6   6  -3   43.78    0.95 
  -6  -6   3   43.11    1.15 
  -6  -6   3   41.76    1.03 
   5   6  -3  187.32    3.06 
   5   6  -3  178.42    3.26 
  -5  -6   3  179.62    3.35 
  -5  -6   3  182.16    3.24 
   4   6  -3  120.19    2.39 
   4   6  -3  126.68    2.11 
   4   6  -3  122.54    2.30 
  -4  -6   3  120.54    2.30 
   3   6  -3  126.80    2.43 
   3   6  -3  125.04    2.30 
   3   6  -3  124.86    2.15 
  -3  -6   3  125.08    2.36 
   2   6  -3   26.33    0.70 
   2   6  -3   25.33    0.80 
  -2  -6   3   26.00    0.77 
  -2  -6   3   26.98    0.63 
   1   6  -3  155.39    2.98 
   1   6  -3  161.85    2.76 
  -1  -6   3  159.70    2.96 
  -1  -6   3  162.85    2.75 
   0   6  -3    8.55    0.50 
   0   6  -3    8.57    0.34 
   0   6  -3    7.55    0.46 
   0  -6   3    8.22    0.46 
   0  -6   3    7.29    0.39 
  -1   6  -3  208.42    3.83 
  -1   6  -3  212.99    3.87 
   1  -6   3  207.72    3.63 
  -2   6  -3    0.65    0.28 
  -2   6  -3    0.88    0.30 
   2  -6   3    0.95    0.26 
  -3   6  -3   45.41    1.32 
  -3   6  -3   46.36    1.27 
   3  -6   3   45.64    1.19 
  -4   6  -3   34.86    1.10 
  -4   6  -3   33.63    1.15 
   4  -6   3   35.05    1.07 
  -5   6  -3   84.92    1.99 
  -5   6  -3   84.48    2.10 
   5  -6   3   86.10    1.98 
  -6   6  -3    9.32    0.71 
  -6   6  -3   10.02    0.67 
   6  -6   3    9.58    0.68 
  -7   6  -3   41.36    1.47 
  -7   6  -3   44.53    1.37 
   7  -6   3   43.08    1.40 
  -8   6  -3   11.37    0.77 
  -8   6  -3   12.59    0.88 
   8  -6   3   10.97    0.81 
  -9   6  -3   11.33    0.94 
  -9   6  -3   11.60    0.84 
   9  -6   3    9.71    0.86 
 -14  -5   3   34.34    1.41 
  13   5  -3   23.59    0.98 
 -13  -5   3   20.50    1.05 
  12   5  -3   50.24    1.43 
 -12  -5   3   52.46    1.59 
  11   5  -3    6.36    0.57 
  11   5  -3    6.30    0.53 
 -11  -5   3    5.78    0.61 
  10   5  -3   84.33    1.87 
  10   5  -3   77.62    1.82 
 -10  -5   3   79.13    1.94 
   9   5  -3    0.29    0.27 
   9   5  -3    0.34    0.27 
  -9  -5   3    0.19    0.27 
   8   5  -3   78.06    1.65 
   8   5  -3   75.23    1.69 
  -8  -5   3   75.84    1.75 
   7   5  -3    7.16    0.42 
   7   5  -3    6.62    0.43 
  -7  -5   3    6.56    0.47 
  -7  -5   3    6.99    0.38 
   6   5  -3  257.31    4.52 
   6   5  -3  269.33    4.38 
  -6  -5   3  263.66    4.63 
  -6  -5   3  259.87    4.45 
   5   5  -3   92.65    1.69 
  -5  -5   3   94.27    1.83 
  -5  -5   3   97.35    1.93 
   4   5  -3  276.06    4.76 
   4   5  -3  291.52    4.56 
   4   5  -3  286.32    4.88 
  -4  -5   3  279.63    4.78 
   3   5  -3   27.01    0.77 
   3   5  -3   26.58    0.71 
   3   5  -3   27.90    0.58 
  -3  -5   3   26.57    0.73 
   2   5  -3  219.01    3.69 
   2   5  -3  219.40    3.85 
  -2  -5   3  216.70    3.57 
  -2  -5   3  223.71    3.81 
   1   5  -3   72.99    1.52 
   1   5  -3   71.86    1.36 
  -1  -5   3   73.09    1.50 
  -1  -5   3   70.70    1.32 
   0   5  -3   46.32    1.14 
   0   5  -3   47.97    0.93 
   0  -5   3   46.03    0.99 
   0  -5   3   47.70    1.12 
  -1   5  -3  356.32    6.17 
  -1   5  -3  362.51    6.12 
  -1   5  -3  370.39    5.74 
   1  -5   3  353.40    5.91 
  -2   5  -3   23.08    0.77 
  -2   5  -3   22.97    0.81 
   2  -5   3   21.56    0.69 
  -3   5  -3   68.80    1.67 
  -3   5  -3   69.53    1.59 
   3  -5   3   70.39    1.54 
  -4   5  -3   16.07    0.71 
  -4   5  -3   17.78    0.79 
   4  -5   3   17.31    0.72 
  -5   5  -3  137.42    2.80 
  -5   5  -3  140.34    2.96 
   5  -5   3  143.49    2.82 
  -6   5  -3    0.15    0.29 
  -6   5  -3    0.02    0.29 
   6  -5   3    0.65    0.36 
  -7   5  -3   69.90    1.74 
  -7   5  -3   69.16    1.89 
   7  -5   3   69.06    1.81 
  -8   5  -3    2.07    0.51 
  -8   5  -3    2.53    0.45 
   8  -5   3    2.14    0.47 
  -9   5  -3   42.25    1.53 
  -9   5  -3   45.93    1.41 
   9  -5   3   45.33    1.53 
 -10   5  -3    9.90    0.91 
  10  -5   3    9.95    0.89 
 -14  -4   3   12.82    0.94 
  13   4  -3   41.61    1.43 
 -13  -4   3   37.74    1.41 
  12   4  -3    7.06    0.58 
  12   4  -3    7.67    0.67 
 -12  -4   3    6.75    0.68 
  11   4  -3   61.78    1.62 
  11   4  -3   60.96    1.53 
 -11  -4   3   60.34    1.68 
  10   4  -3   51.68    1.37 
  10   4  -3   50.70    1.33 
 -10  -4   3   51.20    1.46 
   9   4  -3   54.32    1.36 
   9   4  -3   58.48    1.38 
  -9  -4   3   53.19    1.44 
   8   4  -3  169.05    3.11 
   8   4  -3  170.63    3.14 
  -8  -4   3  170.88    3.25 
   7   4  -3   35.10    0.92 
   7   4  -3   36.94    0.96 
  -7  -4   3   37.30    0.84 
  -7  -4   3   34.69    1.01 
   6   4  -3  105.04    1.97 
   6   4  -3  107.83    2.06 
  -6  -4   3  109.23    1.95 
  -6  -4   3  102.75    2.10 
   5   4  -3   72.32    1.49 
   5   4  -3   71.33    1.37 
  -5  -4   3   73.05    1.53 
  -5  -4   3   74.61    1.45 
   4   4  -3  445.91    6.93 
   4   4  -3  432.38    7.12 
  -4  -4   3  435.00    7.16 
  -4  -4   3  436.79    7.25 
   3   4  -3    5.52    0.33 
   3   4  -3    5.34    0.21 
   3   4  -3    5.99    0.33 
  -3  -4   3    6.13    0.33 
   2   4  -3  195.56    3.36 
   2   4  -3  191.85    3.23 
  -2  -4   3  187.35    3.30 
  -2  -4   3  193.12    3.09 
   1   4  -3   10.01    0.42 
   1   4  -3   10.00    0.35 
  -1  -4   3    9.77    0.30 
  -1  -4   3    9.62    0.40 
   0   4  -3  316.65    5.43 
   0   4  -3  326.38    5.16 
   0  -4   3  322.86    5.19 
   0  -4   3  320.33    5.39 
  -1   4  -3  109.96    2.16 
  -1   4  -3  113.45    2.14 
  -1   4  -3  112.52    1.86 
   1  -4   3  111.68    2.01 
  -2   4  -3  280.95    4.87 
  -2   4  -3  291.96    4.98 
   2  -4   3  279.66    4.75 
  -3   4  -3  124.23    2.50 
  -3   4  -3  125.29    2.41 
   3  -4   3  123.48    2.34 
  -4   4  -3   95.57    2.08 
  -4   4  -3   93.50    1.95 
   4  -4   3   92.57    1.94 
  -5   4  -3   64.70    1.64 
  -5   4  -3   65.69    1.53 
   5  -4   3   67.25    1.58 
  -6   4  -3   38.14    1.10 
  -6   4  -3   36.17    1.19 
   6  -4   3   38.32    1.17 
  -7   4  -3   59.03    1.49 
  -7   4  -3   56.44    1.63 
   7  -4   3   58.76    1.57 
  -8   4  -3   10.32    0.64 
  -8   4  -3   11.02    0.77 
   8  -4   3   10.52    0.70 
  -9   4  -3   29.15    1.06 
  -9   4  -3   28.98    1.22 
   9  -4   3   27.58    1.14 
 -10   4  -3    2.04    0.55 
  10  -4   3    1.98    0.56 
 -11   4  -3   30.75    1.39 
  14   3  -3    3.58    0.65 
 -14  -3   3    4.61    0.70 
  13   3  -3   36.87    1.35 
 -13  -3   3   36.95    1.40 
  12   3  -3   -0.24    0.37 
 -12  -3   3   -0.03    0.39 
  11   3  -3   43.69    1.21 
  11   3  -3   45.08    1.35 
 -11  -3   3   42.36    1.38 
  10   3  -3    5.20    0.52 
  10   3  -3    5.28    0.45 
 -10  -3   3    4.84    0.53 
   9   3  -3  138.77    2.66 
   9   3  -3  141.01    2.74 
  -9  -3   3  138.93    2.84 
   8   3  -3   76.92    1.63 
   8   3  -3   76.87    1.66 
  -8  -3   3   75.86    1.73 
   7   3  -3   75.07    1.59 
   7   3  -3   74.73    1.58 
  -7  -3   3   77.18    1.68 
  -7  -3   3   80.48    1.49 
   6   3  -3   74.01    1.48 
   6   3  -3   75.22    1.54 
  -6  -3   3   74.89    1.59 
  -6  -3   3   76.50    1.44 
   5   3  -3  237.44    4.00 
   5   3  -3  230.08    3.89 
  -5  -3   3  234.25    4.08 
  -5  -3   3  240.76    3.95 
   4   3  -3   73.98    1.47 
   4   3  -3   76.85    1.36 
  -4  -3   3   76.90    1.47 
  -4  -3   3   76.78    1.51 
   3   3  -3  132.95    2.19 
  -3  -3   3  137.59    2.39 
   2   3  -3  471.23    7.30 
   2   3  -3  467.82    7.49 
   2   3  -3  472.50    7.64 
  -2  -3   3  464.10    7.60 
   1   3  -3  217.01    3.58 
   1   3  -3  212.08    3.71 
  -1  -3   3  222.22    3.48 
  -1  -3   3  224.73    3.70 
   0   3  -3  239.52    4.15 
   0   3  -3  248.36    3.94 
   0  -3   3  242.38    4.11 
   0  -3   3  248.20    3.95 
  -1   3  -3   76.70    1.51 
  -1   3  -3   76.27    1.56 
  -1   3  -3   78.10    1.31 
   1  -3   3   77.84    1.52 
   1  -3   3   77.41    1.43 
  -2   3  -3  338.43    5.71 
  -2   3  -3  333.06    5.25 
  -2   3  -3  335.24    5.61 
   2  -3   3  337.57    5.50 
  -3   3  -3    0.78    0.21 
  -3   3  -3    0.13    0.20 
   3  -3   3    0.10    0.18 
  -4   3  -3  218.98    3.87 
  -4   3  -3  218.86    4.00 
   4  -3   3  222.10    3.88 
  -5   3  -3    0.45    0.21 
  -5   3  -3    0.84    0.30 
   5  -3   3    0.74    0.26 
  -6   3  -3   83.25    1.96 
  -6   3  -3   87.40    1.83 
   6  -3   3   86.09    1.91 
  -7   3  -3   35.97    1.04 
  -7   3  -3   34.10    1.16 
   7  -3   3   38.14    1.18 
  -8   3  -3   32.44    1.19 
  -8   3  -3   33.44    1.02 
   8  -3   3   29.28    1.09 
  -9   3  -3   27.73    1.15 
   9  -3   3   26.99    1.09 
 -10   3  -3   19.53    1.01 
  10  -3   3   22.13    1.07 
 -11   3  -3   17.65    1.05 
  11  -3   3   18.08    1.04 
  14   2  -3   19.22    1.09 
 -14  -2   3   18.00    1.10 
  13   2  -3   19.19    1.03 
 -13  -2   3   18.88    1.04 
  12   2  -3    9.43    0.78 
 -12  -2   3   10.46    0.75 
  11   2  -3   73.72    1.87 
 -11  -2   3   70.44    1.87 
  10   2  -3   12.98    0.60 
  10   2  -3   13.28    0.71 
 -10  -2   3   12.20    0.73 
   9   2  -3   95.62    1.93 
   9   2  -3   93.20    2.05 
  -9  -2   3   95.43    2.12 
   8   2  -3    1.47    0.31 
   8   2  -3    1.31    0.25 
  -8  -2   3    1.32    0.23 
  -8  -2   3    1.36    0.30 
   7   2  -3  146.67    2.66 
   7   2  -3  141.38    2.70 
  -7  -2   3  148.84    2.58 
  -7  -2   3  147.19    2.79 
   6   2  -3   24.11    0.70 
   6   2  -3   26.05    0.72 
  -6  -2   3   26.27    0.77 
  -6  -2   3   25.51    0.65 
   5   2  -3   99.79    1.84 
   5   2  -3   95.20    1.79 
  -5  -2   3   97.23    1.78 
  -5  -2   3  100.56    1.89 
   4   2  -3   28.57    0.64 
  -4  -2   3   29.29    0.72 
  -4  -2   3   28.32    0.67 
   3   2  -3  177.12    2.92 
   3   2  -3  179.86    3.05 
  -3  -2   3  181.63    3.08 
  -3  -2   3  185.84    3.10 
   2   2  -3   65.21    1.23 
   2   2  -3   66.11    1.25 
   2   2  -3   65.21    1.06 
  -2  -2   3   68.17    1.27 
   1   2  -3  105.32    1.82 
  -1  -2   3  107.43    1.68 
  -1  -2   3  105.49    1.88 
   0   2  -3  146.34    2.58 
   0   2  -3  150.29    2.45 
   0  -2   3  146.14    2.56 
   0  -2   3  155.04    2.43 
  -1   2  -3  586.12    9.31 
  -1   2  -3  577.84    9.55 
   1  -2   3  586.99    9.47 
   1  -2   3  607.15    9.29 
  -2   2  -3   55.20    1.13 
  -2   2  -3   54.44    0.93 
  -2   2  -3   56.39    1.20 
   2  -2   3   55.00    1.11 
  -3   2  -3  181.76    3.27 
  -3   2  -3  181.35    3.16 
   3  -2   3  183.00    3.16 
  -4   2  -3  266.34    4.52 
  -4   2  -3  261.86    4.67 
   4  -2   3  270.44    4.54 
  -5   2  -3   43.48    1.04 
  -5   2  -3   42.00    1.16 
   5  -2   3   43.76    1.12 
  -6   2  -3   96.65    2.10 
  -6   2  -3   93.77    1.91 
   6  -2   3   95.86    2.04 
  -7   2  -3    1.42    0.29 
  -7   2  -3    2.14    0.40 
   7  -2   3    1.89    0.39 
  -8   2  -3   76.13    1.93 
  -8   2  -3   78.76    1.70 
   8  -2   3   74.65    1.87 
  -9   2  -3   10.27    0.74 
   9  -2   3   10.31    0.69 
 -10   2  -3   44.48    1.50 
  10  -2   3   45.50    1.50 
 -11   2  -3    1.37    0.51 
  11  -2   3    0.89    0.49 
 -12   2  -3   19.95    1.14 
  14   1  -3   24.58    1.24 
  13   1  -3    0.32    0.45 
 -13  -1   3    0.66    0.49 
  12   1  -3   37.10    1.34 
 -12  -1   3   39.36    1.40 
  11   1  -3   54.39    1.57 
 -11  -1   3   52.17    1.57 
  10   1  -3   30.47    1.09 
 -10  -1   3   31.31    1.09 
   9   1  -3   10.34    0.62 
   9   1  -3    9.06    0.50 
  -9  -1   3   10.53    0.61 
   8   1  -3   22.67    0.70 
   8   1  -3   22.43    0.82 
  -8  -1   3   23.13    0.84 
  -8  -1   3   23.72    0.68 
   7   1  -3   80.41    1.73 
   7   1  -3   81.69    1.63 
  -7  -1   3   83.09    1.77 
  -7  -1   3   83.41    1.61 
   6   1  -3   36.51    0.94 
   6   1  -3   37.07    0.89 
  -6  -1   3   38.88    0.98 
  -6  -1   3   38.05    0.86 
   5   1  -3  387.78    6.25 
   5   1  -3  387.66    6.26 
  -5  -1   3  376.71    6.38 
  -5  -1   3  385.14    6.27 
   4   1  -3   10.42    0.36 
   4   1  -3   10.24    0.38 
  -4  -1   3   10.44    0.36 
  -4  -1   3    9.72    0.39 
   3   1  -3   33.32    0.68 
   3   1  -3   33.76    0.74 
  -3  -1   3   34.64    0.74 
  -3  -1   3   33.59    0.74 
   2   1  -3    0.07    0.11 
   2   1  -3    0.09    0.07 
  -2  -1   3   -0.01    0.10 
  -2  -1   3    0.06    0.12 
   1   1  -3  698.49   11.32 
   1   1  -3  711.19   11.44 
  -1  -1   3  692.32   11.45 
   0   1  -3   19.42    0.48 
   0   1  -3   21.64    0.46 
   0  -1   3   19.87    0.40 
   0  -1   3   19.73    0.48 
  -1   1  -3   30.33    0.69 
  -1   1  -3   30.52    0.60 
   1  -1   3   31.27    0.63 
   1  -1   3   29.43    0.65 
  -2   1  -3    1.28    0.12 
  -2   1  -3    1.50    0.19 
   2  -1   3    1.08    0.15 
   2  -1   3    0.99    0.15 
  -3   1  -3  126.56    2.33 
  -3   1  -3  125.49    2.22 
  -3   1  -3  128.35    2.06 
   3  -1   3  123.43    2.25 
  -4   1  -3   37.18    0.96 
  -4   1  -3   36.45    0.84 
  -4   1  -3   37.81    0.70 
   4  -1   3   36.67    0.92 
  -5   1  -3  196.14    3.39 
  -5   1  -3  198.54    3.18 
  -5   1  -3  192.67    3.58 
   5  -1   3  197.90    3.51 
  -6   1  -3   35.14    0.88 
  -6   1  -3   35.48    1.05 
   6  -1   3   35.21    1.01 
  -7   1  -3   16.80    0.76 
  -7   1  -3   16.79    0.59 
   7  -1   3   15.84    0.71 
  -8   1  -3   41.30    1.04 
  -8   1  -3   39.63    1.26 
   8  -1   3   40.18    1.23 
  -9   1  -3   17.00    0.87 
   9  -1   3   16.46    0.82 
 -10   1  -3   95.50    2.38 
  10  -1   3   96.53    2.32 
 -11   1  -3    3.79    0.58 
  11  -1   3    3.52    0.59 
 -12   1  -3   19.79    1.10 
  12  -1   3   20.73    1.11 
  13   0  -3    0.63    0.51 
 -13   0   3    0.85    0.52 
  12   0  -3   20.12    1.04 
 -12   0   3   20.47    1.05 
  11   0  -3    0.89    0.39 
 -11   0   3    0.83    0.44 
  10   0  -3   77.17    1.94 
 -10   0   3   79.53    1.97 
   9   0  -3    9.67    0.61 
  -9   0   3    9.21    0.50 
  -9   0   3    8.42    0.61 
   8   0  -3   29.28    0.79 
   8   0  -3   28.74    0.96 
  -8   0   3   28.59    0.82 
  -8   0   3   30.67    0.98 
   7   0  -3   21.21    0.74 
   7   0  -3   21.77    0.64 
  -7   0   3   21.80    0.76 
  -7   0   3   20.86    0.65 
   6   0  -3  139.81    2.47 
   6   0  -3  140.56    2.59 
  -6   0   3  135.49    2.50 
  -6   0   3  141.71    2.62 
   5   0  -3  291.15    4.75 
   5   0  -3  283.07    4.82 
  -5   0   3  290.94    4.81 
  -5   0   3  289.37    4.89 
   4   0  -3  110.22    1.99 
   4   0  -3  112.46    1.96 
  -4   0   3  111.76    2.02 
  -4   0   3  107.88    1.98 
   3   0  -3  232.23    3.78 
   3   0  -3  228.80    3.75 
  -3   0   3  230.43    3.82 
  -3   0   3  228.51    3.82 
   2   0  -3    2.49    0.19 
   2   0  -3    2.43    0.16 
  -2   0   3    2.63    0.19 
  -2   0   3    2.47    0.17 
   1   0  -3  232.27    3.71 
   1   0  -3  227.19    3.73 
  -1   0   3  229.29    3.62 
  -1   0   3  230.49    3.77 
   0   0  -3    9.31    0.30 
   0   0  -3   10.17    0.26 
   0   0   3   10.39    0.31 
   0   0   3   10.00    0.24 
  -1   0  -3  381.46    6.03 
  -1   0  -3  382.61    6.14 
   1   0   3  375.13    6.01 
   1   0   3  381.40    6.11 
  -2   0  -3    1.03    0.12 
  -2   0  -3    1.06    0.17 
   2   0   3    1.11    0.14 
   2   0   3    0.74    0.16 
  -3   0  -3   97.48    1.82 
  -3   0  -3   96.12    1.64 
   3   0   3   95.86    1.77 
   3   0   3   97.19    1.70 
  -4   0  -3    0.78    0.12 
  -4   0  -3    0.64    0.14 
  -4   0  -3    0.92    0.22 
   4   0   3    0.69    0.20 
  -5   0  -3  203.43    3.57 
  -5   0  -3  200.96    3.36 
   5   0   3  189.54    3.48 
   5   0   3  198.22    3.25 
  -6   0  -3   34.58    1.00 
  -6   0  -3   34.11    0.80 
   6   0   3   33.71    0.96 
   6   0   3   33.51    0.74 
  -7   0  -3   46.36    1.29 
  -7   0  -3   47.23    1.04 
   7   0   3   46.40    1.26 
  -8   0  -3    1.73    0.39 
   8   0   3    1.23    0.36 
  -9   0  -3   43.22    1.34 
   9   0   3   40.70    1.29 
 -10   0  -3   57.93    1.69 
  10   0   3   59.59    1.68 
 -11   0  -3    8.44    0.78 
  11   0   3   10.99    0.80 
 -12   0  -3   24.15    1.14 
  12   0   3   21.54    1.08 
 -13   0  -3    3.59    0.63 
  13  -1  -3    4.40    0.71 
 -13   1   3    5.57    0.75 
  12  -1  -3   18.72    1.00 
 -12   1   3   21.50    1.08 
  11  -1  -3    5.36    0.64 
 -11   1   3    4.93    0.62 
  10  -1  -3   59.29    1.67 
 -10   1   3   61.76    1.69 
   9  -1  -3   17.63    0.80 
  -9   1   3   16.87    0.81 
  -9   1   3   16.68    0.70 
   8  -1  -3   50.66    1.36 
  -8   1   3   53.05    1.38 
  -8   1   3   48.67    1.21 
   7  -1  -3    1.77    0.31 
   7  -1  -3    1.54    0.22 
  -7   1   3    1.43    0.25 
  -7   1   3    1.78    0.32 
   6  -1  -3   84.88    1.56 
   6  -1  -3   82.43    1.74 
  -6   1   3   80.72    1.73 
  -6   1   3   81.25    1.65 
   5  -1  -3   11.63    0.39 
   5  -1  -3   11.41    0.50 
  -5   1   3   10.37    0.46 
  -5   1   3   10.93    0.44 
   4  -1  -3  405.06    6.48 
   4  -1  -3  401.97    6.38 
  -4   1   3  387.21    6.53 
  -4   1   3  395.59    6.51 
   3  -1  -3  162.43    2.74 
   3  -1  -3  162.72    2.78 
  -3   1   3  165.40    2.82 
  -3   1   3  164.80    2.79 
   2  -1  -3   83.80    1.48 
   2  -1  -3   82.97    1.47 
  -2   1   3   82.71    1.44 
  -2   1   3   82.30    1.50 
   1  -1  -3  255.18    4.17 
  -1   1   3  255.92    4.11 
  -1   1   3  257.96    4.11 
  -1   1   3  261.96    4.20 
   0  -1  -3  436.60    7.01 
   0  -1  -3  442.96    6.98 
   0   1   3  432.73    7.13 
   0   1   3  449.09    6.92 
  -1  -1  -3  445.21    7.09 
  -1  -1  -3  442.71    7.29 
   1   1   3  450.99    7.09 
   1   1   3  456.09    7.15 
  -2  -1  -3    4.72    0.21 
  -2  -1  -3    4.23    0.23 
   2   1   3    4.31    0.20 
   2   1   3    4.75    0.24 
  -3  -1  -3  216.22    3.43 
  -3  -1  -3  204.84    3.54 
   3   1   3  206.27    3.51 
   3   1   3  212.11    3.41 
  -4  -1  -3    9.79    0.41 
   4   1   3    9.38    0.42 
   4   1   3   10.29    0.34 
   4   1   3    9.80    0.29 
  -5  -1  -3  128.69    2.43 
  -5  -1  -3  130.24    2.21 
   5   1   3  130.19    2.24 
  -6  -1  -3    4.31    0.38 
  -6  -1  -3    4.73    0.26 
   6   1   3    3.98    0.39 
   6   1   3    4.44    0.28 
  -7  -1  -3  149.57    2.57 
  -7  -1  -3  145.07    2.89 
   7   1   3  149.93    2.58 
   7   1   3  146.49    2.86 
  -8  -1  -3    0.19    0.29 
   8   1   3   -0.21    0.28 
  -9  -1  -3   48.89    1.42 
   9   1   3   46.71    1.37 
 -10  -1  -3   12.35    0.77 
  10   1   3   12.09    0.76 
 -11  -1  -3   39.31    1.41 
  11   1   3   42.30    1.41 
 -12  -1  -3   24.02    1.14 
  12   1   3   22.45    1.10 
 -13  -1  -3   28.05    1.27 
  13   1   3   27.13    1.27 
 -13   2   3   32.47    1.40 
  12  -2  -3   12.59    0.92 
 -12   2   3   12.52    0.91 
  11  -2  -3   21.17    1.02 
 -11   2   3   22.13    1.05 
  10  -2  -3   17.95    0.92 
 -10   2   3   16.70    0.88 
   9  -2  -3   44.08    1.35 
  -9   2   3   44.08    1.21 
  -9   2   3   47.07    1.39 
  -8   2   3  137.28    2.66 
  -8   2   3  135.22    2.80 
   7  -2  -3    5.66    0.49 
  -7   2   3    5.90    0.43 
  -7   2   3    6.03    0.49 
   6  -2  -3  108.00    2.20 
   6  -2  -3  109.46    1.95 
  -6   2   3  108.59    2.19 
  -6   2   3  108.74    2.12 
   5  -2  -3    4.59    0.39 
   5  -2  -3    4.72    0.27 
  -5   2   3    4.77    0.37 
  -5   2   3    4.63    0.35 
   4  -2  -3  248.56    3.96 
   4  -2  -3  241.37    4.10 
  -4   2   3  234.94    4.10 
  -4   2   3  238.40    4.11 
   3  -2  -3    7.75    0.31 
   3  -2  -3    7.29    0.35 
  -3   2   3    7.23    0.33 
  -3   2   3    6.91    0.33 
   2  -2  -3  623.95    9.84 
   2  -2  -3  619.59    9.86 
  -2   2   3  611.27    9.99 
  -2   2   3  635.85   10.06 
   1  -2  -3    1.29    0.15 
   1  -2  -3    1.60    0.17 
  -1   2   3    1.46    0.16 
  -1   2   3    1.35    0.15 
  -1   2   3    1.89    0.13 
   0   2   3   54.38    1.02 
   0   2   3   54.12    1.01 
  -1  -2  -3   19.30    0.38 
   1   2   3   19.49    0.42 
   1   2   3   18.24    0.45 
  -2  -2  -3  163.18    2.77 
  -2  -2  -3  169.65    2.78 
   2   2   3  167.49    2.81 
   2   2   3  166.88    2.70 
  -3  -2  -3  602.27    9.66 
   3   2   3  601.22    9.51 
   3   2   3  604.14    9.56 
   3   2   3  594.68    9.52 
  -4  -2  -3  179.89    3.12 
   4   2   3  178.25    3.02 
   4   2   3  183.73    2.90 
   4   2   3  176.25    3.11 
  -5  -2  -3   74.42    1.54 
   5   2   3   77.18    1.44 
   5   2   3   75.15    1.29 
  -6  -2  -3   53.27    1.25 
   6   2   3   54.00    0.98 
   6   2   3   52.69    1.26 
   6   2   3   52.63    1.11 
  -7  -2  -3  236.99    4.28 
   7   2   3  236.14    4.24 
   7   2   3  239.81    4.02 
  -8  -2  -3   45.04    1.27 
   8   2   3   44.81    1.26 
   8   2   3   46.20    1.06 
  -9  -2  -3  117.02    2.51 
   9   2   3  114.45    2.49 
   9   2   3  115.73    2.19 
 -10  -2  -3    2.40    0.46 
  10   2   3    2.62    0.44 
 -11  -2  -3   17.49    0.89 
  11   2   3   18.19    0.93 
 -12  -2  -3    0.64    0.45 
  12   2   3    0.96    0.46 
 -13  -2  -3   82.23    2.31 
  13   2   3   81.57    2.27 
  11  -3  -3   74.54    2.10 
 -11   3   3   76.08    2.09 
  10  -3  -3    2.28    0.48 
 -10   3   3    2.52    0.50 
   9  -3  -3   41.03    1.35 
  -9   3   3   42.23    1.21 
  -9   3   3   42.78    1.36 
   8  -3  -3   11.90    0.72 
  -8   3   3   12.96    0.71 
  -8   3   3   12.22    0.63 
   7  -3  -3  116.20    2.45 
  -7   3   3  117.03    2.43 
  -7   3   3  115.46    2.35 
   6  -3  -3   50.87    1.30 
  -6   3   3   48.50    1.21 
  -6   3   3   48.23    1.24 
   5  -3  -3   65.55    1.22 
   5  -3  -3   65.17    1.47 
  -5   3   3   61.49    1.42 
  -5   3   3   63.51    1.42 
   4  -3  -3   58.24    1.31 
   4  -3  -3   59.46    1.12 
  -4   3   3   58.50    1.29 
  -4   3   3   58.08    1.27 
   3  -3  -3   40.08    0.96 
   3  -3  -3   42.76    0.86 
  -3   3   3   41.01    0.96 
  -3   3   3   40.68    0.92 
   2  -3  -3  439.14    7.16 
   2  -3  -3  452.29    7.11 
  -2   3   3  424.71    7.24 
  -2   3   3  460.08    7.20 
   1  -3  -3  180.09    3.04 
   1  -3  -3  184.33    3.09 
  -1   3   3  179.53    3.12 
  -1   3   3  187.74    3.02 
   0  -3  -3  577.46    9.43 
   0   3   3  608.86    9.56 
   0   3   3  604.79    9.55 
  -1  -3  -3    1.72    0.13 
  -1  -3  -3    1.24    0.17 
   1   3   3    0.93    0.14 
   1   3   3    1.22    0.17 
  -2  -3  -3  260.61    4.30 
  -2  -3  -3  267.82    4.29 
   2   3   3  267.18    4.24 
   2   3   3  257.53    4.31 
  -3  -3  -3   20.16    0.52 
   3   3   3   20.28    0.53 
   3   3   3   19.65    0.58 
   3   3   3   20.03    0.39 
  -4  -3  -3  721.17   11.57 
   4   3   3  724.41   11.46 
   4   3   3  709.31   11.39 
  -5  -3  -3   23.15    0.66 
   5   3   3   22.60    0.62 
   5   3   3   22.59    0.70 
  -6  -3  -3  127.08    2.41 
   6   3   3  125.03    2.41 
   6   3   3  125.94    2.29 
  -7  -3  -3   20.50    0.73 
   7   3   3   21.25    0.65 
   7   3   3   21.03    0.75 
  -8  -3  -3  147.32    2.91 
   8   3   3  148.24    2.90 
   8   3   3  147.88    2.70 
  -9  -3  -3   70.70    1.73 
   9   3   3   67.85    1.70 
   9   3   3   67.26    1.48 
 -10  -3  -3   22.20    0.94 
  10   3   3   21.30    0.90 
  10   3   3   22.38    0.74 
 -11  -3  -3   10.49    0.74 
  11   3   3   10.40    0.73 
 -12  -3  -3   12.65    0.81 
  12   3   3   12.66    0.85 
 -13  -3  -3   78.05    2.20 
  13   3   3   78.53    2.19 
  14   3   3    7.64    0.84 
  11  -4  -3   42.39    1.53 
  10  -4  -3   13.74    0.90 
 -10   4   3   12.31    0.74 
 -10   4   3   13.16    0.87 
   9  -4  -3   41.26    1.39 
  -9   4   3   38.24    1.32 
  -9   4   3   39.63    1.23 
   8  -4  -3    1.19    0.40 
  -8   4   3    1.66    0.37 
  -8   4   3    1.89    0.41 
  -7   4   3   95.24    2.13 
  -7   4   3   95.61    2.08 
   6  -4  -3   -0.06    0.26 
  -6   4   3    0.20    0.26 
  -6   4   3   -0.12    0.24 
   5  -4  -3  161.41    3.05 
  -5   4   3  161.07    3.03 
  -5   4   3  159.98    3.02 
   4  -4  -3    5.46    0.43 
   4  -4  -3    6.03    0.30 
  -4   4   3    4.35    0.37 
  -4   4   3    5.32    0.41 
   3  -4  -3   69.75    1.32 
   3  -4  -3   71.76    1.49 
  -3   4   3   70.35    1.44 
  -3   4   3   67.79    1.47 
   2  -4  -3   56.68    1.10 
   2  -4  -3   54.92    1.19 
  -2   4   3   52.54    1.19 
  -2   4   3   54.74    1.12 
   1  -4  -3  452.22    7.27 
   1  -4  -3  449.63    7.34 
  -1   4   3  461.26    7.45 
  -1   4   3  456.64    7.35 
   0  -4  -3  185.36    3.15 
   0   4   3  192.00    3.12 
   0   4   3  187.79    3.22 
   0   4   3  189.41    3.21 
  -1  -4  -3  123.15    2.14 
   1   4   3  123.66    2.07 
   1   4   3  121.47    2.13 
   1   4   3  120.76    2.16 
  -2  -4  -3   51.01    1.03 
  -2  -4  -3   48.75    0.95 
   2   4   3   50.11    0.96 
   2   4   3   50.59    1.05 
  -3  -4  -3  172.51    2.87 
   3   4   3  166.43    2.89 
   3   4   3  163.43    2.91 
   3   4   3  170.80    2.76 
  -4  -4  -3  751.25   12.13 
   4   4   3  749.17   12.02 
   4   4   3  765.93   11.90 
   4   4   3  751.08   11.99 
  -5  -4  -3   35.54    0.90 
   5   4   3   38.98    0.98 
   5   4   3   38.38    0.91 
  -6  -4  -3  173.38    3.15 
   6   4   3  173.97    3.08 
   6   4   3  174.26    3.18 
  -7  -4  -3    0.88    0.26 
   7   4   3    1.02    0.29 
   7   4   3    1.43    0.25 
  -8  -4  -3  129.11    2.57 
   8   4   3  126.19    2.57 
   8   4   3  124.82    2.41 
  -9  -4  -3    2.92    0.40 
   9   4   3    3.15    0.42 
   9   4   3    2.77    0.34 
 -10  -4  -3  142.89    3.02 
  10   4   3  145.23    3.01 
  10   4   3  147.53    2.78 
 -11  -4  -3    5.68    0.60 
  11   4   3    5.79    0.62 
  11   4   3    5.40    0.47 
 -12  -4  -3   20.64    0.98 
  12   4   3   20.70    1.01 
 -13  -4  -3   18.46    1.03 
  13   4   3   16.77    0.99 
 -14  -4  -3   33.25    1.43 
  14   4   3   38.43    1.49 
  10  -5  -3   36.23    1.44 
 -10   5   3   39.25    1.34 
   9  -5  -3   32.84    1.29 
  -9   5   3   34.27    1.18 
   8  -5  -3   17.20    0.90 
  -8   5   3   17.32    0.85 
  -8   5   3   16.95    0.81 
   7  -5  -3   29.82    1.08 
  -7   5   3   27.70    1.00 
  -7   5   3   30.40    1.06 
   6  -5  -3   54.46    1.45 
  -6   5   3   52.90    1.41 
  -6   5   3   52.88    1.39 
  -5   5   3  119.81    2.44 
  -5   5   3  121.45    2.46 
   4  -5  -3   20.90    0.75 
  -4   5   3   20.23    0.73 
  -4   5   3   20.10    0.75 
   3  -5  -3   71.33    1.33 
   3  -5  -3   67.97    1.52 
  -3   5   3   67.17    1.52 
  -3   5   3   70.46    1.49 
   2  -5  -3    0.11    0.18 
   2  -5  -3    0.61    0.17 
  -2   5   3    0.35    0.17 
  -2   5   3    0.72    0.21 
   1  -5  -3  264.46    4.38 
   1  -5  -3  264.92    4.49 
  -1   5   3  277.48    4.45 
  -1   5   3  257.41    4.54 
   0  -5  -3    3.97    0.26 
   0   5   3    4.32    0.24 
   0   5   3    4.00    0.32 
   0   5   3    4.28    0.29 
  -1  -5  -3  270.66    4.41 
   1   5   3  269.11    4.39 
   1   5   3  260.74    4.45 
   1   5   3  265.42    4.45 
  -2  -5  -3   21.35    0.53 
  -2  -5  -3   21.57    0.59 
   2   5   3   21.50    0.55 
   2   5   3   20.73    0.60 
   2   5   3   20.58    0.59 
  -3  -5  -3  164.11    2.80 
   3   5   3  159.84    2.84 
   3   5   3  163.67    2.73 
   3   5   3  159.77    2.83 
  -4  -5  -3   43.84    0.97 
   4   5   3   44.74    1.01 
   4   5   3   41.53    1.02 
   4   5   3   44.12    0.82 
  -5  -5  -3  154.36    2.80 
   5   5   3  158.96    2.81 
   5   5   3  154.28    2.85 
  -6  -5  -3  144.33    2.68 
   6   5   3  145.98    2.66 
   6   5   3  142.37    2.73 
  -7  -5  -3   50.46    1.24 
   7   5   3   47.71    1.25 
   7   5   3   50.47    1.20 
  -8  -5  -3   76.67    1.74 
   8   5   3   77.23    1.78 
   8   5   3   75.82    1.65 
  -9  -5  -3   44.23    1.26 
   9   5   3   41.87    1.24 
   9   5   3   42.52    1.14 
 -10  -5  -3  108.12    2.42 
  10   5   3  109.90    2.44 
  10   5   3  108.56    2.24 
 -11  -5  -3   15.59    0.80 
  11   5   3   15.44    0.72 
  11   5   3   14.47    0.79 
 -12  -5  -3   74.02    1.99 
  12   5   3   72.17    1.98 
  12   5   3   73.47    1.74 
 -13  -5  -3   -0.20    0.41 
  13   5   3    0.21    0.42 
 -14  -5  -3   27.25    1.27 
  14   5   3   27.11    1.27 
 -10   6   3   27.05    1.16 
   9  -6  -3    0.45    0.42 
  -9   6   3    0.68    0.42 
   8  -6  -3   62.73    1.81 
  -8   6   3   64.98    1.74 
   7  -6  -3   12.19    0.77 
  -7   6   3   12.66    0.73 
   6  -6  -3   28.24    1.04 
  -6   6   3   29.03    1.03 
  -6   6   3   30.29    1.05 
   5  -6  -3   30.50    1.04 
  -5   6   3   31.71    1.04 
  -5   6   3   33.77    1.04 
   4  -6  -3   54.06    1.39 
  -4   6   3   52.68    1.33 
  -4   6   3   53.88    1.37 
   3  -6  -3   92.13    1.95 
  -3   6   3   93.52    1.89 
  -3   6   3   87.86    1.94 
   2  -6  -3   12.57    0.46 
   2  -6  -3   13.23    0.58 
  -2   6   3   12.57    0.58 
  -2   6   3   12.47    0.52 
   1  -6  -3  106.13    1.96 
   1  -6  -3  110.82    2.12 
  -1   6   3  110.12    2.02 
  -1   6   3  106.15    2.13 
   0  -6  -3   30.40    0.76 
   0  -6  -3   31.80    0.85 
   0   6   3   31.27    0.84 
   0   6   3   31.64    0.75 
  -1  -6  -3  134.03    2.42 
   1   6   3  138.09    2.40 
   1   6   3  134.87    2.49 
   1   6   3  137.58    2.49 
  -2  -6  -3   47.99    1.07 
   2   6   3   48.72    1.06 
   2   6   3   49.08    1.02 
   2   6   3   49.36    1.11 
  -3  -6  -3   92.81    1.76 
   3   6   3   96.53    1.74 
   3   6   3   94.20    1.83 
   3   6   3   93.71    1.82 
  -4  -6  -3    8.34    0.38 
   4   6   3    8.28    0.32 
   4   6   3    9.16    0.44 
   4   6   3    8.06    0.43 
  -5  -6  -3   96.04    1.87 
   5   6   3   94.38    1.66 
   5   6   3   96.33    1.91 
   5   6   3   97.80    1.94 
  -6  -6  -3    2.86    0.32 
   6   6   3    3.30    0.34 
   6   6   3    2.98    0.34 
  -7  -6  -3  194.40    3.57 
   7   6   3  198.73    3.61 
   7   6   3  192.81    3.53 
  -8  -6  -3   31.16    0.95 
   8   6   3   28.70    0.97 
   8   6   3   28.96    0.90 
  -9  -6  -3   53.89    1.41 
   9   6   3   51.56    1.33 
   9   6   3   52.34    1.45 
 -10  -6  -3   20.19    0.85 
  10   6   3   20.00    0.90 
  10   6   3   21.34    0.81 
 -11  -6  -3   68.51    1.83 
  11   6   3   70.26    1.69 
  11   6   3   69.29    1.83 
 -12  -6  -3   44.14    1.44 
  12   6   3   43.92    1.28 
  12   6   3   43.58    1.46 
 -13  -6  -3    9.10    0.81 
  13   6   3    9.19    0.81 
 -14  -6  -3   17.31    1.03 
  14   6   3   16.83    1.02 
  -9   7   3    1.17    0.49 
   8  -7  -3   48.72    1.60 
  -8   7   3   48.18    1.54 
   7  -7  -3    3.21    0.55 
  -7   7   3    4.13    0.55 
   6  -7  -3   47.74    1.47 
  -6   7   3   49.57    1.44 
   5  -7  -3    2.45    0.42 
  -5   7   3    1.92    0.38 
  -5   7   3    2.11    0.40 
   4  -7  -3   77.89    1.83 
  -4   7   3   76.69    1.77 
  -4   7   3   73.22    1.79 
   3  -7  -3    6.39    0.52 
  -3   7   3    7.25    0.50 
  -3   7   3    7.40    0.51 
   2  -7  -3   94.50    2.01 
  -2   7   3   94.67    1.91 
  -2   7   3   92.69    2.01 
   1  -7  -3   31.49    0.93 
   1  -7  -3   31.44    0.79 
  -1   7   3   29.67    0.92 
  -1   7   3   30.96    0.83 
   0  -7  -3   22.09    0.64 
   0  -7  -3   21.31    0.73 
   0   7   3   22.52    0.75 
   0   7   3   22.63    0.65 
  -1  -7  -3   82.30    1.61 
   1   7   3   79.89    1.58 
   1   7   3   81.09    1.68 
  -2  -7  -3  126.49    2.31 
   2   7   3  125.35    2.35 
   2   7   3  118.38    2.30 
   2   7   3  124.71    2.26 
  -3  -7  -3  129.97    2.37 
   3   7   3  131.86    2.38 
   3   7   3  129.98    2.43 
   3   7   3  128.89    2.43 
  -4  -7  -3    1.58    0.23 
   4   7   3    1.50    0.26 
   4   7   3    1.52    0.21 
   4   7   3    1.41    0.26 
  -5  -7  -3   32.07    0.87 
   5   7   3   33.60    0.74 
   5   7   3   33.37    0.92 
   5   7   3   32.09    0.91 
  -6  -7  -3   12.55    0.54 
   6   7   3   11.82    0.57 
   6   7   3   11.37    0.57 
  -7  -7  -3  170.12    3.19 
   7   7   3  172.33    3.24 
   7   7   3  170.72    3.20 
  -8  -7  -3    6.56    0.51 
   8   7   3    6.86    0.56 
   8   7   3    6.58    0.52 
  -9  -7  -3   64.13    1.63 
   9   7   3   67.63    1.61 
   9   7   3   67.61    1.69 
 -10  -7  -3    4.35    0.50 
  10   7   3    4.12    0.46 
  10   7   3    3.62    0.49 
 -11  -7  -3   23.13    0.98 
  11   7   3   22.68    1.00 
  11   7   3   21.59    0.88 
 -12  -7  -3    2.48    0.51 
  12   7   3    3.36    0.54 
  12   7   3    2.37    0.44 
 -13  -7  -3   57.26    1.76 
  13   7   3   58.28    1.79 
  13   7   3   58.34    1.60 
 -14  -7  -3   12.23    0.92 
  14   7   3   11.90    0.90 
  -8   8   3   18.76    1.03 
   7  -8  -3   29.48    1.24 
  -7   8   3   28.62    1.19 
   6  -8  -3   38.28    1.35 
  -6   8   3   40.61    1.34 
   5  -8  -3    0.34    0.34 
  -5   8   3    0.39    0.37 
   4  -8  -3   49.65    1.45 
  -4   8   3   51.72    1.47 
   3  -8  -3    4.36    0.47 
  -3   8   3    5.56    0.51 
  -3   8   3    5.25    0.47 
   2  -8  -3  168.32    3.28 
  -2   8   3  166.50    3.32 
  -2   8   3  179.20    3.21 
   1  -8  -3    2.84    0.38 
  -1   8   3    3.20    0.40 
  -1   8   3    3.27    0.34 
   0  -8  -3   54.71    1.19 
   0  -8  -3   53.50    1.31 
   0   8   3   53.93    1.22 
   0   8   3   52.05    1.33 
  -1  -8  -3   18.16    0.62 
  -1  -8  -3   18.48    0.69 
   1   8   3   17.44    0.68 
   1   8   3   17.18    0.67 
   1   8   3   17.21    0.60 
  -2  -8  -3  102.08    1.97 
   2   8   3   99.35    1.94 
   2   8   3  100.03    2.01 
   2   8   3   97.87    2.02 
   3   8   3    4.05    0.37 
   3   8   3    4.49    0.36 
   3   8   3    4.34    0.34 
   3   8   3    4.68    0.39 
  -4  -8  -3   87.95    1.79 
   4   8   3   88.93    1.85 
   4   8   3   87.09    1.84 
   4   8   3   92.50    1.76 
  -5  -8  -3   62.31    1.38 
   5   8   3   61.99    1.43 
   5   8   3   60.62    1.26 
   5   8   3   59.83    1.42 
  -6  -8  -3    6.97    0.45 
   6   8   3    7.66    0.50 
   6   8   3    7.50    0.51 
  -7  -8  -3   85.55    1.84 
   7   8   3   86.44    1.88 
   7   8   3   83.00    1.87 
  -8  -8  -3   32.64    1.02 
   8   8   3   35.33    1.10 
   8   8   3   32.31    1.04 
  -9  -8  -3   93.64    2.12 
   9   8   3   95.43    2.13 
   9   8   3   98.11    2.19 
 -10  -8  -3    0.32    0.33 
  10   8   3    0.18    0.28 
  10   8   3    0.50    0.33 
 -11  -8  -3   37.32    1.24 
  11   8   3   36.42    1.18 
  11   8   3   39.33    1.31 
 -12  -8  -3    0.83    0.43 
  12   8   3    0.83    0.36 
  12   8   3    0.96    0.44 
 -13  -8  -3   46.92    1.56 
  13   8   3   48.99    1.62 
  13   8   3   48.60    1.47 
 -14  -8  -3    0.08    0.46 
  14   8   3    0.06    0.45 
  14   8   3    0.35    0.40 
  15   8   3   20.24    1.14 
  -7   9   3   29.36    1.27 
   6  -9  -3    5.69    0.69 
  -6   9   3    5.31    0.66 
   5  -9  -3   38.00    1.34 
  -5   9   3   37.40    1.33 
   4  -9  -3   36.80    1.25 
  -4   9   3   37.22    1.27 
   3  -9  -3   17.42    0.82 
  -3   9   3   16.27    0.84 
   2  -9  -3   70.96    1.75 
   1  -9  -3   77.88    1.82 
  -1   9   3   80.17    1.72 
  -1   9   3   75.17    1.85 
   0  -9  -3   50.34    1.33 
   0   9   3   50.84    1.23 
   0   9   3   50.74    1.36 
  -1  -9  -3    3.31    0.35 
  -1  -9  -3    3.28    0.40 
   1   9   3    3.68    0.42 
   1   9   3    3.78    0.37 
  -2  -9  -3   98.09    1.99 
   2   9   3  101.16    1.99 
   2   9   3   95.74    2.05 
   2   9   3  100.91    2.08 
  -3  -9  -3    0.78    0.26 
   3   9   3    0.51    0.26 
   3   9   3    0.56    0.23 
   3   9   3    0.42    0.26 
  -4  -9  -3  128.72    2.50 
   4   9   3  129.31    2.48 
   4   9   3  131.57    2.57 
   4   9   3  133.44    2.56 
  -5  -9  -3    5.60    0.42 
   5   9   3    5.10    0.45 
   5   9   3    5.55    0.39 
   5   9   3    5.76    0.49 
  -6  -9  -3   64.96    1.50 
   6   9   3   63.58    1.53 
   6   9   3   66.50    1.57 
  -7  -9  -3   65.14    1.54 
   7   9   3   64.09    1.59 
   7   9   3   65.47    1.57 
  -8  -9  -3   63.07    1.55 
   8   9   3   62.57    1.56 
   8   9   3   60.06    1.55 
  -9  -9  -3   13.31    0.70 
   9   9   3   13.32    0.74 
   9   9   3   14.01    0.73 
 -10  -9  -3   45.53    1.38 
  10   9   3   47.04    1.40 
  10   9   3   50.33    1.44 
 -11  -9  -3   34.53    1.23 
  11   9   3   37.80    1.29 
  11   9   3   35.49    1.22 
 -12  -9  -3    2.36    0.47 
  12   9   3    2.73    0.49 
  12   9   3    3.05    0.56 
 -13  -9  -3   26.64    1.17 
  13   9   3   24.35    1.06 
  13   9   3   24.31    1.14 
  14   9   3   10.13    0.90 
  14   9   3    9.02    0.78 
   5 -10  -3   46.73    1.59 
  -5  10   3   49.56    1.62 
   4 -10  -3    0.61    0.42 
  -4  10   3    0.19    0.41 
   3 -10  -3   37.87    1.29 
  -3  10   3   37.37    1.32 
   2 -10  -3   34.89    1.18 
  -2  10   3   31.46    1.18 
   1 -10  -3   54.18    1.48 
  -1  10   3   51.61    1.50 
   0 -10  -3   38.77    1.17 
   0  10   3   35.81    1.18 
  -1 -10  -3   42.63    1.22 
   1  10   3   40.23    1.23 
   1  10   3   44.56    1.15 
  -2 -10  -3   79.89    1.73 
  -2 -10  -3   77.12    1.79 
   2  10   3   81.16    1.73 
   2  10   3   78.08    1.82 
  -3 -10  -3    7.12    0.50 
   3  10   3    6.14    0.45 
   3  10   3    7.47    0.55 
   3  10   3    6.72    0.50 
  -4 -10  -3   93.19    1.96 
   4  10   3   91.39    2.01 
   4  10   3   95.68    2.03 
   4  10   3   94.62    1.97 
  -5 -10  -3   25.14    0.83 
   5  10   3   25.00    0.90 
   5  10   3   24.85    0.87 
  -6 -10  -3  117.32    2.38 
   6  10   3  115.19    2.43 
   6  10   3  115.13    2.39 
  -7 -10  -3    0.84    0.29 
   7  10   3    0.21    0.29 
   7  10   3   -0.13    0.26 
  -8 -10  -3   54.40    1.44 
   8  10   3   54.06    1.45 
   8  10   3   54.99    1.49 
  -9 -10  -3    2.17    0.41 
   9  10   3    2.15    0.43 
   9  10   3    2.10    0.43 
 -10 -10  -3   51.00    1.50 
  10  10   3   52.52    1.53 
  10  10   3   57.50    1.57 
 -11 -10  -3    1.81    0.46 
  11  10   3    1.38    0.41 
  11  10   3    1.95    0.45 
 -12 -10  -3   51.74    1.62 
  12  10   3   53.43    1.63 
  12  10   3   48.96    1.55 
 -13 -10  -3   25.55    1.16 
   4 -11  -3   14.12    0.88 
  -4  11   3   13.57    0.92 
   3 -11  -3   63.49    1.81 
  -3  11   3   61.44    1.82 
   2 -11  -3    0.34    0.38 
  -2  11   3    0.52    0.38 
   1 -11  -3   63.44    1.70 
  -1  11   3   60.67    1.73 
   0 -11  -3    0.62    0.35 
   0  11   3    0.79    0.35 
  -1 -11  -3   98.85    2.22 
   1  11   3   99.70    2.28 
  -2 -11  -3    5.79    0.53 
   2  11   3    4.87    0.52 
  -3 -11  -3   84.45    1.89 
   3  11   3   85.73    1.95 
   3  11   3   81.76    1.92 
   3  11   3   84.69    1.87 
  -4 -11  -3   35.10    1.09 
  -4 -11  -3   34.32    1.03 
   4  11   3   34.61    1.08 
   4  11   3   35.14    1.07 
  -5 -11  -3   26.22    0.89 
   5  11   3   25.05    0.92 
   5  11   3   22.92    0.91 
  -6 -11  -3   27.26    0.94 
   6  11   3   26.84    1.00 
   6  11   3   29.08    0.97 
  -7 -11  -3   39.09    1.16 
   7  11   3   38.35    1.17 
   7  11   3   37.72    1.23 
  -8 -11  -3   84.78    1.98 
   8  11   3   84.59    2.06 
   8  11   3   85.21    1.98 
  -9 -11  -3    1.94    0.41 
   9  11   3    1.33    0.42 
   9  11   3    1.80    0.43 
 -10 -11  -3   49.63    1.47 
  10  11   3   49.07    1.50 
 -11 -11  -3    9.41    0.73 
  11  11   3    9.43    0.77 
 -12 -11  -3   80.39    2.12 
 -13 -11  -3    0.26    0.45 
  13  11   3    0.57    0.46 
   3 -12  -3    7.48    0.78 
   2 -12  -3   22.16    1.06 
  -2  12   3   21.95    1.10 
   1 -12  -3   31.87    1.21 
  -1  12   3   31.71    1.26 
   0 -12  -3    1.48    0.43 
   0  12   3    1.70    0.44 
  -1 -12  -3   62.14    1.66 
   1  12   3   59.16    1.70 
  -2 -12  -3   29.62    1.07 
   2  12   3   30.11    1.12 
  -3 -12  -3   78.62    1.89 
   3  12   3   78.34    1.94 
  -4 -12  -3    0.25    0.32 
   4  12   3   -0.26    0.32 
   4  12   3   -0.32    0.31 
  -5 -12  -3   54.51    1.49 
   5  12   3   53.75    1.47 
   6  12   3    3.93    0.49 
   6  12   3    3.69    0.50 
  -7 -12  -3   92.59    2.12 
   7  12   3   89.88    2.18 
   7  12   3   97.27    2.15 
  -8 -12  -3    6.56    0.59 
   8  12   3    6.90    0.66 
  -9 -12  -3   44.21    1.36 
   9  12   3   42.23    1.39 
 -10 -12  -3   32.09    1.19 
  10  12   3   33.79    1.26 
 -11 -12  -3   36.05    1.30 
  11  12   3   33.88    1.32 
 -12 -12  -3   28.57    1.20 
  12  12   3   26.69    1.17 
   1 -13  -3    3.95    0.60 
  -1  13   3    3.97    0.65 
   0 -13  -3   24.44    1.08 
   0  13   3   22.89    1.12 
  -1 -13  -3   29.69    1.16 
   1  13   3   26.86    1.16 
  -2 -13  -3   30.75    1.15 
   2  13   3   29.23    1.17 
  -3 -13  -3   23.93    0.98 
   3  13   3   23.48    1.01 
  -4 -13  -3   23.26    0.96 
  -5 -13  -3   45.99    1.38 
   5  13   3   46.19    1.39 
  -6 -13  -3    0.69    0.39 
   7  13   3   51.94    1.56 
   8  13   3    5.08    0.64 
  -9 -13  -3   39.91    1.33 
   9  13   3   44.56    1.48 
 -10 -13  -3    0.28    0.41 
  10  13   3   -0.27    0.40 
 -11 -13  -3   48.38    1.56 
  11  13   3   47.42    1.61 
 -12 -13  -3    1.58    0.54 
   1  14   3   10.51    0.89 
   2  14   3   39.97    1.47 
   3  14   3    4.54    0.63 
  -7 -14  -3   42.15    1.43 
   8  14   3   14.54    0.90 
   9  14   3    7.39    0.73 
  -8 -15  -3   21.78    1.09 
   8  14  -4   11.36    0.84 
  -6 -14   4   33.65    1.37 
   5  14  -4    7.16    0.78 
   4  14  -4   14.51    0.96 
  -4 -14   4   12.79    0.92 
  10  13  -4   33.08    1.32 
   9  13  -4    8.42    0.77 
  -9 -13   4    8.01    0.80 
   8  13  -4   25.47    1.11 
  -8 -13   4   25.32    1.16 
   7  13  -4    8.53    0.75 
  -7 -13   4    7.90    0.75 
  -6 -13   4   43.57    1.50 
   5  13  -4    3.95    0.61 
   4  13  -4   42.59    1.50 
  -4 -13   4   43.22    1.49 
   3  13  -4    0.06    0.42 
  -3 -13   4   -0.17    0.41 
   2  13  -4   11.94    0.87 
  -2 -13   4   12.32    0.89 
   1  13  -4    1.63    0.53 
  -1 -13   4    1.07    0.53 
   0  13  -4   25.85    1.25 
  11  12  -4   22.80    1.13 
 -11 -12   4   24.98    1.18 
  10  12  -4    0.15    0.42 
 -10 -12   4    0.63    0.43 
   9  12  -4   86.98    2.21 
  -9 -12   4   84.18    2.25 
   8  12  -4    4.19    0.58 
  -8 -12   4    5.40    0.62 
   7  12  -4   41.12    1.34 
  -7 -12   4   40.74    1.39 
   6  12  -4   27.92    1.06 
  -6 -12   4   27.01    1.13 
   5  12  -4   30.64    1.21 
  -5 -12   4   31.75    1.18 
   4  12  -4   55.01    1.66 
  -4 -12   4   57.17    1.65 
   3  12  -4   14.40    0.87 
  -3 -12   4   13.59    0.81 
   2  12  -4   29.17    1.20 
  -2 -12   4   29.56    1.21 
   1  12  -4    0.49    0.44 
  -1 -12   4    0.72    0.43 
   0  12  -4   52.81    1.71 
   0 -12   4   51.28    1.67 
  -1  12  -4    0.91    0.48 
   1 -12   4   -0.22    0.45 
  -2  12  -4   51.96    1.78 
  12  11  -4    8.24    0.80 
 -12 -11   4    9.55    0.85 
  11  11  -4   27.96    1.17 
 -11 -11   4   27.69    1.21 
  10  11  -4    8.04    0.72 
 -10 -11   4    8.59    0.78 
   9  11  -4   71.45    1.90 
  -9 -11   4   67.48    1.93 
   8  11  -4    3.12    0.48 
  -8 -11   4    3.00    0.51 
   7  11  -4  102.60    2.34 
  -7 -11   4  102.59    2.44 
   6  11  -4    5.79    0.56 
  -6 -11   4    6.05    0.62 
   5  11  -4   46.24    1.31 
   5  11  -4   43.24    1.39 
  -5 -11   4   46.31    1.37 
   4  11  -4    7.58    0.66 
  -4 -11   4    7.10    0.63 
   3  11  -4   97.65    2.34 
  -3 -11   4   97.15    2.30 
   2  11  -4   36.84    1.29 
  -2 -11   4   36.59    1.28 
   1  11  -4   24.46    1.04 
  -1 -11   4   24.09    1.07 
   0  11  -4   15.75    0.90 
   0 -11   4   16.22    0.91 
  -1  11  -4   19.26    1.02 
   1 -11   4   19.52    1.01 
  -2  11  -4   43.46    1.54 
   2 -11   4   39.47    1.46 
  -3  11  -4   10.70    0.92 
  -4  11  -4   26.32    1.29 
  12  10  -4   52.19    1.66 
 -12 -10   4   51.27    1.69 
  11  10  -4   22.28    1.04 
 -11 -10   4   22.73    1.07 
  10  10  -4   26.00    1.06 
 -10 -10   4   27.82    1.14 
   9  10  -4   31.25    1.15 
  -9 -10   4   30.88    1.18 
   8  10  -4   53.65    1.51 
  -8 -10   4   52.35    1.55 
   7  10  -4   67.10    1.71 
  -7 -10   4   67.78    1.80 
   6  10  -4   12.35    0.68 
  -6 -10   4   11.79    0.71 
   5  10  -4   53.55    1.39 
   5  10  -4   49.60    1.46 
  -5 -10   4   51.88    1.41 
   4  10  -4    7.13    0.54 
   4  10  -4    7.07    0.61 
  -4 -10   4    6.34    0.57 
   3  10  -4  102.05    2.35 
  -3 -10   4  103.72    2.32 
   2  10  -4    0.46    0.34 
  -2 -10   4    0.93    0.34 
   1  10  -4  106.32    2.46 
  -1 -10   4  107.33    2.45 
   0  10  -4    7.76    0.69 
   0 -10   4    7.02    0.64 
  -1  10  -4   33.04    1.25 
   1 -10   4   32.14    1.19 
  -2  10  -4    3.53    0.56 
   2 -10   4    4.21    0.56 
  -3  10  -4   51.75    1.67 
   3 -10   4   49.04    1.58 
  -4  10  -4   13.96    0.94 
   4 -10   4   13.13    0.89 
  -5  10  -4   15.76    1.03 
  13   9  -4    0.65    0.41 
 -13  -9   4    1.22    0.51 
  12   9  -4   39.78    1.39 
 -12  -9   4   39.50    1.43 
  11   9  -4    0.28    0.35 
 -11  -9   4    0.12    0.39 
  10   9  -4   70.96    1.86 
 -10  -9   4   72.44    1.92 
   9   9  -4   20.42    0.90 
  -9  -9   4   19.27    0.88 
   8   9  -4   56.37    1.52 
  -8  -9   4   56.27    1.57 
   7   9  -4    5.62    0.52 
  -7  -9   4    5.48    0.53 
   6   9  -4  102.83    2.22 
  -6  -9   4  102.22    2.19 
  -6  -9   4  106.43    2.33 
   5   9  -4   28.29    0.93 
   5   9  -4   27.57    1.00 
  -5  -9   4   27.87    0.94 
   4   9  -4   47.49    1.21 
   4   9  -4   45.28    1.30 
  -4  -9   4   45.44    1.27 
   3   9  -4   46.25    1.33 
   3   9  -4   50.71    1.22 
  -3  -9   4   45.87    1.31 
   2   9  -4   46.31    1.36 
  -2  -9   4   49.40    1.37 
   1   9  -4   90.53    2.14 
  -1  -9   4   94.82    2.15 
   0   9  -4   25.94    1.02 
   0  -9   4   25.48    0.98 
  -1   9  -4   41.09    1.33 
   1  -9   4   41.00    1.31 
  -2   9  -4    1.77    0.43 
   2  -9   4    2.03    0.44 
  -3   9  -4   50.29    1.58 
   3  -9   4   47.00    1.50 
   3  -9   4   49.91    1.41 
  -4   9  -4    1.71    0.46 
   4  -9   4    1.06    0.42 
   4  -9   4    0.80    0.44 
  -5   9  -4   63.13    1.92 
   5  -9   4   60.23    1.80 
   5  -9   4   59.04    1.71 
  -6   9  -4   10.66    0.95 
   6  -9   4   11.44    0.85 
   6  -9   4   12.10    0.86 
  14   8  -4   13.72    0.91 
  13   8  -4   10.40    0.78 
 -13  -8   4   11.66    0.86 
  12   8  -4   36.13    1.28 
 -12  -8   4   34.94    1.30 
  11   8  -4   11.05    0.73 
 -11  -8   4    8.83    0.67 
 -10  -8   4   50.74    1.50 
   9   8  -4    4.55    0.49 
  -9  -8   4    5.07    0.54 
   8   8  -4   31.62    1.05 
  -8  -8   4   33.71    1.13 
   7   8  -4    3.33    0.42 
  -7  -8   4    2.80    0.41 
   6   8  -4   70.98    1.63 
  -6  -8   4   67.51    1.68 
  -6  -8   4   66.47    1.56 
   5   8  -4    1.26    0.31 
   5   8  -4    1.36    0.30 
  -5  -8   4    1.55    0.32 
   4   8  -4   82.43    1.89 
   4   8  -4   83.08    1.77 
  -4  -8   4   82.87    1.83 
   3   8  -4   23.48    0.84 
   3   8  -4   22.16    0.74 
  -3  -8   4   21.85    0.82 
   2   8  -4   35.08    1.09 
   2   8  -4   35.87    0.94 
  -2  -8   4   37.36    1.10 
   1   8  -4   36.52    1.14 
  -1  -8   4   37.05    1.13 
   0   8  -4  209.30    4.00 
   0  -8   4  208.80    3.68 
   0  -8   4  208.24    3.96 
  -1   8  -4   68.42    1.77 
   1  -8   4   71.13    1.77 
   1  -8   4   72.91    1.60 
  -2   8  -4   17.94    0.84 
   2  -8   4   16.95    0.79 
   2  -8   4   17.96    0.74 
  -3   8  -4   42.72    1.40 
   3  -8   4   41.19    1.30 
   3  -8   4   42.43    1.22 
  -4   8  -4   13.17    0.83 
  -4   8  -4   12.80    0.78 
   4  -8   4   11.82    0.75 
   4  -8   4   12.27    0.76 
  -5   8  -4   44.85    1.52 
  -5   8  -4   41.43    1.41 
   5  -8   4   43.44    1.37 
   5  -8   4   40.61    1.38 
  -6   8  -4    7.31    0.77 
   6  -8   4    8.06    0.73 
   6  -8   4    7.19    0.69 
  -7   8  -4   18.19    1.08 
   7  -8   4   18.24    0.99 
   7  -8   4   18.97    1.02 
  14   7  -4    1.04    0.47 
 -14  -7   4    0.00    0.47 
  13   7  -4   32.65    1.22 
 -13  -7   4   30.43    1.28 
  12   7  -4    7.94    0.67 
 -12  -7   4    8.88    0.75 
  11   7  -4   22.03    0.94 
 -11  -7   4   22.25    0.98 
  10   7  -4   20.41    0.87 
 -10  -7   4   17.77    0.87 
   9   7  -4   39.54    1.20 
  -9  -7   4   38.59    1.23 
  -8  -7   4   64.12    1.63 
   7   7  -4    1.38    0.30 
  -7  -7   4    1.32    0.31 
   6   7  -4  117.02    2.35 
  -6  -7   4  117.18    2.31 
  -6  -7   4  118.12    2.44 
   5   7  -4    7.02    0.47 
   5   7  -4    7.11    0.48 
  -5  -7   4    7.40    0.50 
   4   7  -4  126.12    2.55 
   4   7  -4  127.01    2.42 
  -4  -7   4  127.84    2.48 
   3   7  -4    0.13    0.21 
   3   7  -4    0.10    0.23 
  -3  -7   4    0.15    0.22 
   2   7  -4   84.89    1.69 
   2   7  -4   87.70    1.89 
  -2  -7   4   84.41    1.84 
  -2  -7   4   83.13    1.58 
   1   7  -4    3.97    0.42 
   1   7  -4    4.14    0.32 
  -1  -7   4    3.78    0.31 
  -1  -7   4    4.40    0.43 
   0   7  -4  170.59    3.37 
   0  -7   4  175.03    3.11 
   0  -7   4  182.05    3.38 
  -1   7  -4    5.29    0.49 
   1  -7   4    5.29    0.49 
   1  -7   4    5.56    0.41 
  -2   7  -4   85.60    2.05 
   2  -7   4   84.87    1.98 
   2  -7   4   89.37    1.85 
  -3   7  -4   10.89    0.71 
  -3   7  -4   11.77    0.69 
   3  -7   4    9.99    0.62 
  -4   7  -4    5.61    0.57 
  -4   7  -4    6.13    0.61 
   4  -7   4    6.51    0.57 
  -5   7  -4   19.34    0.96 
  -5   7  -4   16.40    0.86 
   5  -7   4   17.47    0.84 
  -6   7  -4   39.19    1.33 
  -6   7  -4   37.46    1.40 
   6  -7   4   38.84    1.31 
  -7   7  -4   20.29    1.09 
  -7   7  -4   22.83    1.04 
   7  -7   4   20.94    1.00 
   7  -7   4   21.35    1.03 
  -8   7  -4    0.38    0.48 
   8  -7   4    0.95    0.46 
   8  -7   4    1.62    0.54 
  14   6  -4    5.19    0.62 
 -14  -6   4    5.94    0.74 
  13   6  -4   30.06    1.14 
 -13  -6   4   29.56    1.24 
  12   6  -4    0.60    0.37 
 -12  -6   4    0.19    0.39 
  11   6  -4   31.97    1.09 
 -11  -6   4   28.90    1.12 
  10   6  -4   21.97    0.89 
 -10  -6   4   21.85    0.92 
   9   6  -4  120.54    2.47 
  -9  -6   4  116.15    2.53 
   8   6  -4   25.48    0.88 
  -8  -6   4   26.98    0.92 
  -7  -6   4   84.26    1.72 
  -7  -6   4   81.02    1.85 
   6   6  -4  152.05    2.90 
  -6  -6   4  159.35    2.88 
  -6  -6   4  152.61    2.98 
   5   6  -4   62.99    1.16 
   5   6  -4   60.98    1.40 
  -5  -6   4   62.84    1.47 
  -5  -6   4   62.75    1.40 
   4   6  -4   88.47    1.55 
   4   6  -4   88.89    1.88 
   4   6  -4   86.50    1.78 
  -4  -6   4   91.14    1.82 
   3   6  -4  153.82    2.77 
   3   6  -4  152.69    2.90 
  -3  -6   4  156.92    2.86 
  -3  -6   4  151.69    2.55 
   2   6  -4   78.05    1.70 
   2   6  -4   80.09    1.56 
  -2  -6   4   77.84    1.67 
  -2  -6   4   77.49    1.42 
   1   6  -4    6.52    0.34 
   1   6  -4    6.19    0.43 
  -1  -6   4    5.95    0.41 
  -1  -6   4    5.94    0.33 
   0   6  -4   83.90    1.54 
   0   6  -4   80.25    1.81 
   0  -6   4   83.53    1.79 
   0  -6   4   83.47    1.61 
  -1   6  -4    5.45    0.48 
   1  -6   4    5.24    0.45 
   1  -6   4    5.81    0.38 
  -2   6  -4   99.38    2.24 
  -2   6  -4  104.55    2.21 
   2  -6   4  105.19    2.07 
   2  -6   4  105.45    2.21 
  -3   6  -4    1.26    0.33 
  -3   6  -4    1.01    0.31 
   3  -6   4    1.13    0.31 
  -4   6  -4   42.73    1.33 
  -4   6  -4   40.28    1.23 
   4  -6   4   40.59    1.18 
  -5   6  -4    7.66    0.68 
  -5   6  -4    9.16    0.63 
   5  -6   4    9.64    0.63 
  -6   6  -4   43.65    1.44 
  -6   6  -4   44.22    1.33 
   6  -6   4   42.84    1.32 
  -7   6  -4    1.71    0.42 
  -7   6  -4    1.87    0.51 
   7  -6   4    1.71    0.48 
  -8   6  -4   44.48    1.60 
  -8   6  -4   45.78    1.47 
   8  -6   4   47.80    1.55 
  -9   6  -4   19.75    1.13 
   9  -6   4   17.03    0.93 
   9  -6   4   19.28    1.06 
 -14  -5   4   10.17    0.91 
  13   5  -4   24.39    1.00 
 -13  -5   4   23.53    1.12 
  12   5  -4   27.94    1.03 
 -12  -5   4   27.76    1.14 
  11   5  -4   24.83    0.95 
 -11  -5   4   26.93    1.04 
  10   5  -4    1.25    0.34 
 -10  -5   4    1.69    0.40 
   9   5  -4  119.47    2.35 
   9   5  -4  117.81    2.43 
  -9  -5   4  118.58    2.52 
   8   5  -4    2.21    0.33 
   8   5  -4    1.80    0.29 
  -8  -5   4    2.34    0.35 
   7   5  -4  159.28    2.81 
  -7  -5   4  157.59    2.85 
  -7  -5   4  159.43    3.06 
   6   5  -4   14.17    0.46 
   6   5  -4   13.77    0.57 
  -6  -5   4   13.87    0.61 
  -6  -5   4   13.57    0.55 
   5   5  -4  167.91    2.74 
   5   5  -4  163.07    3.00 
  -5  -5   4  163.81    3.06 
  -5  -5   4  165.13    2.99 
   4   5  -4   76.15    1.63 
   4   5  -4   78.37    1.33 
   4   5  -4   75.89    1.57 
  -4  -5   4   76.15    1.58 
   3   5  -4  222.34    3.85 
   3   5  -4  226.75    3.98 
  -3  -5   4  227.58    3.93 
   2   5  -4   77.92    1.63 
   2   5  -4   79.55    1.52 
  -2  -5   4   76.81    1.60 
  -2  -5   4   78.09    1.37 
   1   5  -4   78.30    1.64 
   1   5  -4   77.02    1.46 
  -1  -5   4   76.98    1.61 
  -1  -5   4   76.57    1.40 
   0   5  -4  223.74    4.03 
   0   5  -4  229.63    3.72 
   0  -5   4  220.76    3.97 
   0  -5   4  226.72    3.75 
  -1   5  -4   36.87    1.03 
  -1   5  -4   37.09    0.75 
   1  -5   4   35.86    0.98 
   1  -5   4   37.47    0.90 
  -2   5  -4   58.44    1.45 
  -2   5  -4   60.99    1.42 
   2  -5   4   57.44    1.30 
   2  -5   4   60.68    1.41 
  -3   5  -4  133.54    2.62 
  -3   5  -4  131.40    2.71 
   3  -5   4  128.63    2.51 
  -4   5  -4  118.65    2.59 
   4  -5   4  122.31    2.43 
  -5   5  -4    4.51    0.53 
  -5   5  -4    3.78    0.45 
   5  -5   4    3.68    0.45 
  -6   5  -4   56.86    1.50 
  -6   5  -4   56.01    1.63 
   6  -5   4   55.65    1.52 
  -7   5  -4    1.38    0.41 
  -7   5  -4    1.39    0.40 
   7  -5   4    0.73    0.39 
  -8   5  -4   35.84    1.20 
  -8   5  -4   33.39    1.32 
   8  -5   4   35.97    1.30 
  -9   5  -4    0.51    0.47 
   9  -5   4    0.50    0.46 
 -10   5  -4   29.10    1.35 
 -14  -4   4   25.82    1.23 
 -13  -4   4   15.18    0.94 
  12   4  -4   54.49    1.47 
 -12  -4   4   52.29    1.63 
  11   4  -4   14.67    0.72 
  11   4  -4   15.38    0.76 
 -11  -4   4   15.04    0.79 
  10   4  -4   23.13    0.85 
  10   4  -4   22.88    0.87 
 -10  -4   4   22.05    0.90 
   9   4  -4   70.96    1.63 
   9   4  -4   71.02    1.61 
  -9  -4   4   69.53    1.71 
   8   4  -4   26.89    0.86 
   8   4  -4   27.52    0.83 
  -8  -4   4   27.52    0.91 
   7   4  -4  120.35    2.34 
   7   4  -4  119.11    2.23 
  -7  -4   4  116.07    2.38 
  -7  -4   4  122.57    2.21 
   6   4  -4  142.23    2.50 
   6   4  -4  142.88    2.65 
  -6  -4   4  140.47    2.70 
  -6  -4   4  144.00    2.58 
   5   4  -4  236.74    4.17 
   5   4  -4  245.82    3.98 
  -5  -4   4  244.87    4.26 
  -5  -4   4  246.68    4.18 
   4   4  -4    1.21    0.21 
   4   4  -4    1.33    0.13 
   4   4  -4    1.09    0.20 
  -4  -4   4    1.47    0.24 
  -4  -4   4    1.36    0.23 
   3   4  -4  355.89    5.92 
   3   4  -4  363.13    6.06 
   3   4  -4  361.13    5.66 
  -3  -4   4  364.98    6.02 
   2   4  -4    4.06    0.32 
   2   4  -4    3.46    0.27 
  -2  -4   4    4.06    0.17 
  -2  -4   4    4.47    0.33 
   1   4  -4  284.64    4.69 
   1   4  -4  283.36    4.89 
  -1  -4   4  290.34    4.59 
  -1  -4   4  288.95    4.87 
   0   4  -4    0.81    0.14 
   0   4  -4    0.58    0.19 
   0  -4   4    0.86    0.15 
   0  -4   4    0.88    0.20 
  -1   4  -4  180.02    3.33 
  -1   4  -4  182.90    2.99 
   1  -4   4  186.23    3.12 
   1  -4   4  182.28    3.28 
  -2   4  -4  159.83    2.56 
  -2   4  -4  158.67    3.03 
   2  -4   4  159.23    2.83 
  -3   4  -4  132.16    2.68 
  -3   4  -4  137.26    2.59 
   3  -4   4  132.54    2.50 
  -4   4  -4   32.50    0.95 
  -4   4  -4   31.91    1.04 
   4  -4   4   32.07    0.95 
  -5   4  -4  124.84    2.68 
  -5   4  -4  127.74    2.54 
   5  -4   4  125.60    2.54 
  -6   4  -4   80.73    2.00 
  -6   4  -4   83.52    1.85 
   6  -4   4   79.28    1.89 
  -7   4  -4    1.24    0.36 
  -7   4  -4    1.36    0.41 
   7  -4   4    0.88    0.39 
  -8   4  -4   49.10    1.58 
  -8   4  -4   50.08    1.40 
   8  -4   4   50.75    1.53 
  -9   4  -4   14.96    0.92 
   9  -4   4   14.20    0.89 
 -10   4  -4   44.66    1.63 
  10  -4   4   45.12    1.59 
 -14  -3   4   29.23    1.32 
  13   3  -4    0.13    0.43 
 -13  -3   4   -0.50    0.41 
 -12  -3   4   66.90    1.87 
  11   3  -4    0.05    0.32 
  11   3  -4    0.00    0.29 
 -11  -3   4   -0.02    0.31 
  10   3  -4   79.56    1.86 
  10   3  -4   78.77    1.77 
 -10  -3   4   77.89    1.92 
   9   3  -4    4.79    0.46 
   9   3  -4    4.14    0.42 
  -9  -3   4    5.56    0.50 
   8   3  -4  128.58    2.47 
   8   3  -4  126.57    2.47 
  -8  -3   4  127.10    2.57 
  -8  -3   4  129.93    2.35 
   7   3  -4   60.70    1.38 
   7   3  -4   61.93    1.34 
  -7  -3   4   62.87    1.29 
  -7  -3   4   61.68    1.44 
   6   3  -4  239.12    4.03 
   6   3  -4  240.71    4.14 
  -6  -3   4  241.98    4.08 
  -6  -3   4  238.47    4.21 
   5   3  -4  105.01    1.87 
   5   3  -4  105.38    2.01 
  -5  -3   4  106.07    1.97 
  -5  -3   4  106.71    2.04 
   4   3  -4  144.21    2.35 
  -4  -3   4  142.67    2.56 
  -4  -3   4  139.29    2.57 
   3   3  -4  324.22    5.35 
   3   3  -4  318.90    5.09 
   3   3  -4  334.72    5.45 
  -3  -3   4  326.52    5.44 
   2   3  -4   97.14    1.77 
   2   3  -4   97.88    1.83 
  -2  -3   4   97.19    1.83 
   1   3  -4  131.60    2.42 
   1   3  -4  136.87    2.32 
  -1  -3   4  132.96    2.41 
  -1  -3   4  136.71    2.18 
   0   3  -4  181.13    2.96 
   0   3  -4  176.51    3.15 
   0  -3   4  178.57    3.13 
   0  -3   4  179.75    2.94 
  -1   3  -4  566.88    8.79 
  -1   3  -4  543.36    9.17 
   1  -3   4  569.47    8.87 
   1  -3   4  552.93    9.09 
  -2   3  -4    6.11    0.42 
  -2   3  -4    5.61    0.20 
   2  -3   4    6.03    0.37 
   2  -3   4    5.75    0.35 
  -3   3  -4  129.73    2.56 
  -3   3  -4  132.19    2.47 
   3  -3   4  131.21    2.42 
  -4   3  -4    4.13    0.37 
  -4   3  -4    4.46    0.43 
   4  -3   4    4.73    0.41 
  -5   3  -4  144.96    2.78 
  -5   3  -4  148.85    2.95 
   5  -3   4  148.32    2.83 
  -6   3  -4   12.43    0.59 
  -6   3  -4   12.55    0.70 
   6  -3   4   11.36    0.65 
  -7   3  -4   61.27    1.66 
  -7   3  -4   62.32    1.49 
   7  -3   4   59.27    1.57 
  -8   3  -4   39.40    1.35 
  -8   3  -4   41.77    1.19 
   8  -3   4   44.10    1.36 
  -9   3  -4   34.81    1.31 
   9  -3   4   34.72    1.27 
 -10   3  -4   15.80    0.97 
  10  -3   4   16.99    0.93 
 -11   3  -4   33.19    1.39 
  11  -3   4   35.26    1.41 
  14   2  -4    5.74    0.76 
 -14  -2   4    4.17    0.70 
  13   2  -4   16.25    0.99 
 -13  -2   4   18.05    1.02 
  12   2  -4   59.84    1.71 
 -12  -2   4   57.51    1.74 
  11   2  -4   16.46    0.83 
 -11  -2   4   17.10    0.88 
  10   2  -4   92.04    1.92 
  10   2  -4   91.05    2.05 
 -10  -2   4   85.96    2.07 
   9   2  -4   26.85    0.93 
   9   2  -4   26.45    0.84 
  -9  -2   4   26.79    0.96 
   8   2  -4  131.26    2.54 
   8   2  -4  130.13    2.48 
  -8  -2   4  127.70    2.61 
  -8  -2   4  132.81    2.41 
   7   2  -4    2.66    0.32 
   7   2  -4    2.72    0.31 
  -7  -2   4    2.90    0.28 
  -7  -2   4    3.15    0.35 
   6   2  -4  301.41    5.05 
   6   2  -4  302.96    5.11 
  -6  -2   4  309.44    5.09 
  -6  -2   4  304.08    5.21 
   5   2  -4   74.79    1.52 
   5   2  -4   74.19    1.43 
  -5  -2   4   79.40    1.49 
  -5  -2   4   75.14    1.54 
   4   2  -4  166.44    2.78 
   4   2  -4  167.48    2.92 
  -4  -2   4  167.76    2.95 
  -4  -2   4  170.99    2.93 
   3   2  -4   12.30    0.44 
   3   2  -4   12.97    0.31 
  -3  -2   4   13.22    0.43 
  -3  -2   4   13.74    0.47 
   2   2  -4  377.87    6.20 
   2   2  -4  375.29    6.11 
  -2  -2   4  383.74    6.23 
   1   2  -4  105.62    1.93 
   1   2  -4  107.11    1.88 
  -1  -2   4  110.09    1.71 
   0   2  -4  502.86    7.92 
   0   2  -4  507.51    8.13 
   0  -2   4  500.23    7.84 
   0  -2   4  488.67    8.09 
  -1   2  -4   20.91    0.60 
  -1   2  -4   19.58    0.46 
   1  -2   4   18.70    0.55 
   1  -2   4   20.17    0.51 
  -2   2  -4   22.58    0.68 
  -2   2  -4   21.98    0.48 
   2  -2   4   22.97    0.60 
   2  -2   4   22.34    0.61 
  -3   2  -4  424.97    6.77 
  -3   2  -4  438.28    7.23 
   3  -2   4  430.27    7.08 
   3  -2   4  428.88    7.01 
  -4   2  -4    4.89    0.20 
  -4   2  -4    5.54    0.44 
  -4   2  -4    5.04    0.34 
   4  -2   4    6.13    0.41 
  -5   2  -4   99.03    2.12 
  -5   2  -4   98.33    1.96 
   5  -2   4  102.39    2.06 
  -6   2  -4   36.14    0.97 
  -6   2  -4   35.62    1.10 
   6  -2   4   35.61    1.06 
  -7   2  -4  107.03    2.14 
  -7   2  -4  102.99    2.35 
   7  -2   4  105.49    2.28 
  -8   2  -4    0.06    0.26 
  -8   2  -4    0.65    0.36 
   8  -2   4    0.21    0.32 
  -9   2  -4  106.75    2.52 
   9  -2   4  102.83    2.44 
 -10   2  -4    1.23    0.46 
  10  -2   4    1.03    0.46 
 -11   2  -4   35.16    1.43 
  11  -2   4   38.30    1.41 
  14   1  -4    1.44    0.61 
 -14  -1   4    2.02    0.62 
  13   1  -4   34.89    1.37 
 -13  -1   4   37.89    1.44 
  12   1  -4   10.63    0.77 
 -12  -1   4   10.18    0.83 
  11   1  -4   79.25    2.01 
 -11  -1   4   80.16    2.02 
  10   1  -4   31.25    1.09 
 -10  -1   4   30.79    1.08 
   9   1  -4  117.20    2.45 
   9   1  -4  120.32    2.30 
  -9  -1   4  116.18    2.49 
   8   1  -4   38.27    1.00 
   8   1  -4   38.80    1.09 
  -8  -1   4   38.20    0.97 
  -8  -1   4   39.72    1.13 
   7   1  -4   38.88    0.97 
   7   1  -4   38.08    1.02 
  -7  -1   4   41.00    0.96 
  -7  -1   4   39.09    1.06 
   6   1  -4   77.70    1.55 
   6   1  -4   74.57    1.55 
  -6  -1   4   78.71    1.53 
  -6  -1   4   76.72    1.61 
   5   1  -4   52.40    1.11 
   5   1  -4   52.84    1.14 
  -5  -1   4   51.72    1.14 
  -5  -1   4   53.92    1.11 
   4   1  -4   17.71    0.49 
   4   1  -4   17.59    0.53 
  -4  -1   4   19.36    0.53 
  -4  -1   4   18.11    0.53 
   3   1  -4   45.86    0.86 
  -3  -1   4   44.87    0.96 
  -3  -1   4   46.24    0.94 
   2   1  -4  231.89    3.75 
   2   1  -4  227.62    3.56 
   2   1  -4  223.05    3.73 
  -2  -1   4  219.85    3.79 
   1   1  -4   63.16    1.18 
   1   1  -4   62.43    1.20 
  -1  -1   4   65.41    1.04 
   0   1  -4  242.74    3.98 
   0   1  -4  246.16    4.05 
   0  -1   4  248.13    3.88 
   0  -1   4  240.16    4.07 
  -1   1  -4   46.42    0.98 
  -1   1  -4   46.96    0.90 
   1  -1   4   45.34    0.89 
   1  -1   4   46.97    0.96 
  -2   1  -4  247.05    3.96 
  -2   1  -4  242.82    4.16 
   2  -1   4  243.96    4.03 
   2  -1   4  244.35    4.08 
  -3   1  -4    2.82    0.28 
  -3   1  -4    3.17    0.20 
   3  -1   4    3.06    0.27 
   3  -1   4    3.48    0.26 
  -4   1  -4  314.11    5.50 
  -4   1  -4  328.04    5.14 
   4  -1   4  322.62    5.35 
   4  -1   4  321.51    5.38 
  -5   1  -4  142.41    2.29 
  -5   1  -4  134.30    2.47 
  -5   1  -4  134.64    2.65 
   5  -1   4  134.00    2.58 
  -6   1  -4   74.33    1.55 
  -6   1  -4   75.84    1.75 
   6  -1   4   77.49    1.72 
  -7   1  -4   34.80    1.12 
  -7   1  -4   34.94    0.92 
   7  -1   4   35.41    1.11 
  -8   1  -4   82.49    1.99 
   8  -1   4   79.76    1.93 
  -9   1  -4   95.53    2.31 
   9  -1   4   97.38    2.28 
 -10   1  -4    1.88    0.47 
  10  -1   4    1.70    0.46 
 -11   1  -4   43.42    1.54 
  11  -1   4   41.56    1.46 
 -12   1  -4    5.24    0.72 
  12  -1   4    4.76    0.70 
  13   0  -4   31.57    1.34 
 -13   0   4   27.63    1.28 
  12   0  -4    5.05    0.63 
 -12   0   4    4.68    0.65 
  11   0  -4   62.80    1.75 
 -11   0   4   62.67    1.77 
  10   0  -4    3.59    0.50 
 -10   0   4    4.04    0.52 
   9   0  -4   77.23    1.82 
  -9   0   4   75.50    1.82 
  -9   0   4   74.42    1.63 
   8   0  -4    4.63    0.37 
   8   0  -4    4.90    0.46 
  -8   0   4    5.28    0.48 
  -8   0   4    5.01    0.40 
   7   0  -4   28.92    0.89 
   7   0  -4   28.09    0.77 
  -7   0   4   27.28    0.87 
  -7   0   4   29.63    0.80 
   6   0  -4   56.36    1.27 
   6   0  -4   54.35    1.18 
  -6   0   4   55.76    1.27 
  -6   0   4   55.68    1.21 
   5   0  -4  161.02    2.79 
   5   0  -4  158.28    2.81 
  -5   0   4  161.24    2.86 
  -5   0   4  158.34    2.82 
   4   0  -4  130.07    2.28 
   4   0  -4  129.13    2.30 
  -4   0   4  131.32    2.33 
  -4   0   4  131.04    2.32 
   3   0  -4  193.61    3.18 
   3   0  -4  191.59    3.25 
  -3   0   4  194.81    3.28 
  -3   0   4  192.76    3.24 
   2   0  -4   62.47    1.10 
   2   0  -4   64.33    1.22 
  -2   0   4   62.03    1.21 
  -2   0   4   61.98    1.13 
   1   0  -4   38.41    0.72 
   1   0  -4   38.28    0.81 
  -1   0   4   38.73    0.69 
  -1   0   4   36.67    0.81 
   0   0  -4  263.11    4.32 
   0   0  -4  269.17    4.32 
   0   0   4  269.73    4.38 
   0   0   4  260.66    4.22 
  -1   0  -4  150.69    2.52 
  -1   0  -4  148.55    2.54 
   1   0   4  147.81    2.55 
   1   0   4  151.16    2.49 
  -2   0  -4   23.57    0.61 
  -2   0  -4   23.52    0.54 
   2   0   4   23.31    0.59 
   2   0   4   23.02    0.56 
  -3   0  -4   75.60    1.50 
  -3   0  -4   76.15    1.35 
   3   0   4   76.47    1.41 
   3   0   4   74.88    1.47 
  -4   0  -4  141.61    2.67 
  -4   0  -4  146.48    2.44 
   4   0   4  144.50    2.62 
   4   0   4  147.89    2.52 
  -5   0  -4   45.98    0.91 
  -5   0  -4   44.68    1.15 
   5   0   4   46.55    0.98 
   5   0   4   45.65    1.11 
  -6   0  -4  107.45    1.86 
  -6   0  -4  101.93    2.18 
  -6   0  -4  102.47    1.94 
   6   0   4  106.33    2.14 
  -7   0  -4   16.81    0.73 
  -7   0  -4   15.71    0.54 
   7   0   4   15.65    0.70 
  -8   0  -4  100.28    2.29 
   8   0   4  104.18    2.27 
  -9   0  -4   15.44    0.80 
   9   0   4   14.85    0.77 
 -10   0  -4   49.93    1.53 
  10   0   4   49.53    1.53 
 -11   0  -4   48.72    1.60 
  11   0   4   46.71    1.56 
 -12   0  -4   22.86    1.16 
  12   0   4   23.18    1.15 
  13  -1  -4   25.79    1.27 
 -13   1   4   28.53    1.30 
  12  -1  -4   12.71    0.89 
 -12   1   4   11.88    0.93 
  11  -1  -4   20.37    0.99 
 -11   1   4   19.78    0.98 
  10  -1  -4   12.48    0.77 
 -10   1   4   13.23    0.78 
   9  -1  -4   78.96    1.92 
  -9   1   4   80.27    1.92 
  -9   1   4   80.62    1.77 
   8  -1  -4   14.91    0.73 
  -8   1   4   15.78    0.72 
  -8   1   4   15.23    0.64 
   7  -1  -4  146.43    2.84 
   7  -1  -4  150.15    2.64 
  -7   1   4  147.04    2.75 
  -7   1   4  146.52    2.84 
   6  -1  -4   20.96    0.61 
   6  -1  -4   21.51    0.73 
  -6   1   4   21.42    0.67 
  -6   1   4   20.69    0.70 
   5  -1  -4  199.80    3.52 
   5  -1  -4  203.32    3.43 
  -5   1   4  202.44    3.53 
  -5   1   4  204.40    3.55 
   4  -1  -4  110.56    2.02 
   4  -1  -4  109.13    1.97 
  -4   1   4  107.20    2.00 
  -4   1   4  111.24    2.03 
   3  -1  -4  156.14    2.66 
   3  -1  -4  156.15    2.66 
  -3   1   4  154.74    2.65 
  -3   1   4  154.65    2.71 
   2  -1  -4    8.53    0.35 
   2  -1  -4    8.58    0.30 
  -2   1   4    8.47    0.26 
  -2   1   4    8.43    0.33 
   1  -1  -4    5.27    0.29 
  -1   1   4    6.04    0.23 
  -1   1   4    6.00    0.26 
  -1   1   4    5.61    0.17 
   0  -1  -4   44.74    0.79 
   0  -1  -4   46.72    0.93 
   0   1   4   45.19    0.85 
  -1  -1  -4   86.22    1.47 
  -1  -1  -4   85.10    1.51 
   1   1   4   83.95    1.49 
   1   1   4   84.22    1.51 
  -2  -1  -4  763.60   12.40 
  -2  -1  -4  771.29   12.34 
   2   1   4  782.16   12.45 
   2   1   4  790.88   12.23 
  -3  -1  -4   61.29    1.12 
  -3  -1  -4   57.33    1.19 
   3   1   4   57.32    1.19 
   3   1   4   59.54    1.09 
  -4  -1  -4   91.10    1.74 
  -4  -1  -4   87.41    1.58 
   4   1   4   86.46    1.71 
   4   1   4   88.38    1.56 
  -5  -1  -4   41.71    1.05 
  -5  -1  -4   40.98    0.88 
   5   1   4   42.95    0.86 
   5   1   4   41.32    1.03 
  -6  -1  -4  223.82    4.05 
  -6  -1  -4  226.58    3.77 
   6   1   4  230.74    3.77 
   6   1   4  219.40    3.98 
  -7  -1  -4    1.66    0.34 
   7   1   4    1.78    0.23 
   7   1   4    1.90    0.22 
   7   1   4    1.95    0.35 
  -8  -1  -4  103.31    2.27 
   8   1   4  102.84    2.25 
  -9  -1  -4   17.84    0.86 
   9   1   4   20.68    0.87 
 -10  -1  -4   50.03    1.55 
  10   1   4   53.69    1.57 
 -11  -1  -4    3.64    0.57 
  11   1   4    4.09    0.59 
 -12  -1  -4   40.78    1.51 
  12   1   4   41.23    1.49 
 -13  -1  -4    7.01    0.80 
  13   1   4    7.30    0.82 
  12  -2  -4   41.93    1.55 
 -12   2   4   45.56    1.57 
  11  -2  -4    8.29    0.77 
 -11   2   4    8.48    0.77 
  10  -2  -4   29.17    1.15 
 -10   2   4   30.02    1.14 
   9  -2  -4   11.60    0.73 
  -9   2   4   10.88    0.60 
  -9   2   4   11.11    0.72 
   8  -2  -4   44.77    1.30 
  -8   2   4   45.95    1.29 
  -8   2   4   44.18    1.19 
   7  -2  -4  103.29    2.18 
  -7   2   4  102.42    2.16 
  -7   2   4  102.84    2.09 
   6  -2  -4   57.62    1.18 
  -6   2   4   57.36    1.33 
  -6   2   4   54.11    1.29 
   5  -2  -4   88.86    1.81 
   5  -2  -4   88.32    1.65 
  -5   2   4   88.52    1.76 
  -5   2   4   87.24    1.77 
   4  -2  -4    1.14    0.22 
   4  -2  -4    1.14    0.19 
  -4   2   4    1.24    0.20 
  -4   2   4    1.14    0.21 
   3  -2  -4  209.57    3.55 
   3  -2  -4  214.82    3.52 
  -3   2   4  210.82    3.61 
  -3   2   4  204.27    3.51 
   2  -2  -4    0.26    0.13 
   2  -2  -4    0.18    0.16 
  -2   2   4    0.09    0.12 
  -2   2   4    0.47    0.11 
   1  -2  -4  242.50    4.01 
  -1   2   4  239.15    3.88 
  -1   2   4  242.00    3.96 
  -1   2   4  247.16    4.04 
   0  -2  -4    0.21    0.15 
   0   2   4   -0.15    0.11 
   0   2   4    0.04    0.12 
  -1  -2  -4  151.29    2.46 
  -1  -2  -4  149.98    2.56 
   1   2   4  149.76    2.55 
   1   2   4  153.33    2.53 
  -2  -2  -4  556.91    8.86 
  -2  -2  -4  560.45    8.80 
   2   2   4  550.99    8.81 
   2   2   4  546.86    8.81 
  -3  -2  -4  505.19    8.05 
  -3  -2  -4  497.69    8.17 
   3   2   4  510.91    8.11 
   3   2   4  505.94    8.03 
  -4  -2  -4  162.76    2.79 
  -4  -2  -4  162.03    2.88 
   4   2   4  166.98    2.70 
   4   2   4  161.35    2.88 
  -5  -2  -4   48.24    1.14 
   5   2   4   52.10    0.94 
   5   2   4   50.26    1.05 
   5   2   4   49.68    1.16 
  -6  -2  -4   46.82    1.18 
   6   2   4   48.32    1.04 
   6   2   4   48.01    0.91 
   6   2   4   46.68    1.17 
  -7  -2  -4   36.59    1.06 
   7   2   4   39.02    1.10 
   7   2   4   36.58    0.90 
   7   2   4   38.79    0.80 
  -8  -2  -4  117.62    2.48 
   8   2   4  118.87    2.20 
   8   2   4  118.01    2.46 
  -9  -2  -4   11.39    0.66 
   9   2   4   10.53    0.68 
 -10  -2  -4   24.95    1.02 
  10   2   4   23.90    0.98 
 -11  -2  -4    1.49    0.46 
  11   2   4    1.24    0.44 
 -12  -2  -4   52.71    1.69 
  12   2   4   53.02    1.68 
 -13  -2  -4    0.24    0.44 
  13   2   4    0.57    0.45 
  11  -3  -4    0.38    0.46 
  10  -3  -4   36.46    1.31 
 -10   3   4   38.10    1.19 
 -10   3   4   37.47    1.31 
   9  -3  -4    0.06    0.35 
  -9   3   4    0.18    0.32 
  -9   3   4   -0.03    0.29 
   8  -3  -4   58.06    1.59 
  -8   3   4   60.18    1.55 
  -8   3   4   58.53    1.48 
   7  -3  -4   47.20    1.32 
  -7   3   4   46.05    1.26 
  -7   3   4   46.43    1.23 
   6  -3  -4  118.50    2.41 
  -6   3   4  117.47    2.36 
  -6   3   4  119.22    2.36 
   5  -3  -4   50.69    1.26 
   5  -3  -4   53.41    1.08 
  -5   3   4   52.32    1.21 
  -5   3   4   50.27    1.22 
   4  -3  -4   39.85    1.02 
   4  -3  -4   41.74    0.89 
  -4   3   4   39.16    0.95 
  -4   3   4   40.14    1.00 
   3  -3  -4  100.53    1.93 
   3  -3  -4  103.98    1.85 
  -3   3   4  100.25    1.85 
  -3   3   4  100.19    1.94 
   2  -3  -4  130.51    2.28 
   2  -3  -4  126.37    2.30 
  -2   3   4  128.56    2.34 
  -2   3   4  129.77    2.21 
   1  -3  -4  416.65    6.65 
  -1   3   4  404.99    6.73 
  -1   3   4  415.43    6.58 
   0  -3  -4   43.88    0.92 
   0   3   4   43.48    0.91 
   0   3   4   43.99    0.74 
   0   3   4   44.27    0.92 
  -1  -3  -4  106.71    1.93 
  -1  -3  -4  110.99    1.81 
   1   3   4  108.10    1.94 
   1   3   4  111.18    1.91 
  -2  -3  -4   62.51    1.22 
  -2  -3  -4   64.89    1.14 
   2   3   4   61.43    1.24 
   2   3   4   63.02    1.14 
  -3  -3  -4  540.32    8.70 
  -3  -3  -4  535.55    8.63 
   3   3   4  536.47    8.66 
   3   3   4  546.53    8.56 
  -4  -3  -4    4.81    0.31 
   4   3   4    3.94    0.16 
   4   3   4    4.49    0.29 
   4   3   4    4.79    0.35 
  -5  -3  -4  266.71    4.50 
   5   3   4  259.06    4.49 
   5   3   4  261.18    4.38 
  -6  -3  -4    5.27    0.40 
   6   3   4    4.71    0.41 
   6   3   4    4.86    0.33 
  -7  -3  -4  109.06    2.19 
   7   3   4  103.87    2.19 
   7   3   4  105.02    2.02 
  -8  -3  -4   52.23    1.36 
   8   3   4   51.10    1.18 
   8   3   4   48.68    1.35 
  -9  -3  -4   85.10    1.99 
   9   3   4   85.23    1.75 
   9   3   4   82.64    1.98 
 -10  -3  -4   47.94    1.43 
  10   3   4   47.26    1.43 
 -11  -3  -4   14.60    0.81 
  11   3   4   14.91    0.85 
 -12  -3  -4   29.12    1.19 
  12   3   4   27.60    1.19 
 -13  -3  -4   22.01    1.12 
  13   3   4   25.62    1.20 
  11  -4  -4   23.26    1.17 
  10  -4  -4   83.11    2.20 
 -10   4   4   81.68    2.03 
   9  -4  -4    5.66    0.63 
  -9   4   4    5.18    0.54 
  -9   4   4    5.26    0.59 
   8  -4  -4   38.15    1.26 
  -8   4   4   38.95    1.23 
  -8   4   4   40.37    1.19 
   7  -4  -4    0.57    0.34 
  -7   4   4    0.80    0.32 
  -7   4   4    0.95    0.32 
   6  -4  -4  108.04    2.29 
  -6   4   4  105.46    2.21 
  -6   4   4  106.08    2.22 
   5  -4  -4    3.57    0.41 
  -5   4   4    4.01    0.39 
  -5   4   4    3.96    0.40 
   4  -4  -4  133.75    2.30 
   4  -4  -4  125.94    2.49 
  -4   4   4  128.22    2.50 
  -4   4   4  132.59    2.44 
   3  -4  -4    6.77    0.41 
   3  -4  -4    6.63    0.36 
  -3   4   4    6.82    0.37 
  -3   4   4    7.15    0.40 
   2  -4  -4  170.56    3.04 
   2  -4  -4  175.72    2.97 
  -2   4   4  173.21    2.95 
  -2   4   4  169.97    3.07 
   1  -4  -4  244.61    4.04 
   1  -4  -4  245.40    4.10 
  -1   4   4  236.42    4.13 
  -1   4   4  245.01    3.98 
   0  -4  -4  298.31    4.88 
   0   4   4  299.97    4.78 
   0   4   4  294.07    4.94 
  -1  -4  -4   87.81    1.49 
  -1  -4  -4   87.47    1.63 
   1   4   4   86.66    1.64 
   1   4   4   88.20    1.61 
  -2  -4  -4   91.29    1.71 
  -2  -4  -4   93.94    1.61 
   2   4   4   91.76    1.63 
   2   4   4   91.64    1.73 
  -3  -4  -4  295.35    4.88 
  -3  -4  -4  296.95    4.85 
   3   4   4  295.29    4.75 
   3   4   4  290.42    4.90 
  -4  -4  -4  164.38    2.80 
   4   4   4  155.68    2.58 
   4   4   4  160.34    2.87 
   4   4   4  156.81    2.80 
  -5  -4  -4  310.02    5.29 
   5   4   4  317.69    5.23 
   5   4   4  313.93    5.32 
  -6  -4  -4   17.22    0.63 
   6   4   4   16.38    0.58 
   6   4   4   17.58    0.66 
  -7  -4  -4  101.65    2.08 
   7   4   4   99.95    2.11 
   7   4   4   98.30    1.95 
  -8  -4  -4    0.19    0.24 
   8   4   4    0.68    0.31 
   8   4   4    0.12    0.21 
  -9  -4  -4  148.22    3.00 
   9   4   4  147.54    3.00 
   9   4   4  149.51    2.80 
 -10  -4  -4   12.62    0.74 
  10   4   4   11.83    0.61 
  10   4   4   11.53    0.72 
 -11  -4  -4   32.29    1.19 
  11   4   4   32.21    1.17 
 -12  -4  -4    4.73    0.61 
  12   4   4    3.87    0.56 
 -13  -4  -4   52.10    1.70 
  13   4   4   54.01    1.73 
  14   4   4   13.28    0.97 
  10  -5  -4   21.09    1.10 
 -10   5   4   20.19    0.96 
   9  -5  -4   40.87    1.43 
  -9   5   4   39.51    1.31 
   8  -5  -4   35.31    1.24 
  -8   5   4   35.28    1.18 
   7  -5  -4   22.34    0.96 
  -7   5   4   23.14    0.91 
  -7   5   4   22.62    0.90 
   6  -5  -4   44.18    1.31 
  -6   5   4   47.38    1.28 
  -6   5   4   48.40    1.31 
   5  -5  -4   58.51    1.49 
  -5   5   4   57.40    1.40 
  -5   5   4   58.79    1.46 
   4  -5  -4  235.01    4.20 
  -4   5   4  233.14    4.13 
  -4   5   4  233.44    4.20 
   3  -5  -4   12.87    0.58 
   3  -5  -4   13.27    0.49 
  -3   5   4   12.68    0.51 
  -3   5   4   14.04    0.60 
   2  -5  -4  162.59    2.80 
   2  -5  -4  158.02    2.92 
  -2   5   4  160.96    2.82 
   1  -5  -4    1.69    0.22 
   1  -5  -4    1.67    0.25 
  -1   5   4    1.92    0.19 
  -1   5   4    1.53    0.24 
   0  -5  -4  358.21    5.84 
   0   5   4  350.67    5.89 
   0   5   4  351.13    5.94 
   0   5   4  369.82    5.80 
  -1  -5  -4    0.27    0.15 
   1   5   4    0.04    0.14 
   1   5   4    0.22    0.15 
   1   5   4    0.21    0.11 
  -2  -5  -4  170.25    2.92 
  -2  -5  -4  166.58    2.81 
   2   5   4  165.76    2.86 
   2   5   4  165.16    2.93 
  -3  -5  -4   26.09    0.63 
   3   5   4   26.50    0.60 
   3   5   4   26.28    0.73 
  -4  -5  -4  138.15    2.44 
   4   5   4  137.07    2.29 
   4   5   4  134.42    2.53 
   4   5   4  137.67    2.50 
  -5  -5  -4  137.58    2.54 
   5   5   4  138.49    2.25 
   5   5   4  141.45    2.57 
   5   5   4  140.44    2.63 
  -6  -5  -4  219.39    3.84 
   6   5   4  216.66    3.89 
   6   5   4  214.53    3.79 
  -7  -5  -4  106.18    2.15 
   7   5   4  106.48    2.22 
   7   5   4  104.88    2.10 
  -8  -5  -4   31.77    0.99 
   8   5   4   30.41    1.02 
   8   5   4   30.81    0.90 
  -9  -5  -4   79.15    1.86 
   9   5   4   77.05    1.88 
   9   5   4   78.64    1.73 
 -10  -5  -4   17.38    0.81 
  10   5   4   19.14    0.74 
  10   5   4   17.50    0.83 
 -11  -5  -4   85.09    2.14 
  11   5   4   88.36    1.94 
  11   5   4   87.46    2.17 
 -12  -5  -4    2.36    0.48 
  12   5   4    2.90    0.51 
 -13  -5  -4   45.96    1.56 
  13   5   4   43.42    1.55 
 -14  -5  -4   -0.10    0.47 
  14   5   4   -0.10    0.46 
 -10   6   4    0.42    0.44 
   9  -6  -4   57.18    1.80 
  -9   6   4   58.93    1.70 
   8  -6  -4    0.32    0.42 
  -8   6   4    0.43    0.38 
   7  -6  -4   32.45    1.20 
  -7   6   4   32.47    1.14 
   6  -6  -4    8.51    0.64 
  -6   6   4    9.48    0.63 
   5  -6  -4   35.32    1.15 
  -5   6   4   35.89    1.13 
  -5   6   4   37.15    1.08 
   4  -6  -4   72.16    1.73 
  -4   6   4   73.26    1.73 
  -4   6   4   76.11    1.66 
   3  -6  -4  107.17    2.23 
  -3   6   4  109.80    2.14 
  -3   6   4  111.60    2.27 
   2  -6  -4   94.24    1.99 
   2  -6  -4   98.78    1.85 
  -2   6   4  100.75    1.89 
  -2   6   4   96.49    2.01 
   1  -6  -4   11.54    0.46 
   1  -6  -4   11.25    0.53 
  -1   6   4   11.89    0.43 
  -1   6   4   11.65    0.54 
   0  -6  -4  187.03    3.27 
   0   6   4  187.56    3.37 
   0   6   4  190.49    3.36 
   0   6   4  192.25    3.21 
  -1  -6  -4  132.07    2.42 
   1   6   4  136.37    2.33 
   1   6   4  133.68    2.45 
  -2  -6  -4  343.61    5.71 
  -2  -6  -4  348.50    5.65 
   2   6   4  342.76    5.71 
   2   6   4  344.20    5.73 
  -3  -6  -4   98.55    1.83 
  -3  -6  -4   99.11    1.93 
   3   6   4  101.91    1.83 
   3   6   4   99.04    1.94 
  -4  -6  -4  140.29    2.49 
   4   6   4  137.95    2.57 
   4   6   4  140.49    2.39 
   4   6   4  136.23    2.58 
  -5  -6  -4    1.60    0.24 
   5   6   4    1.85    0.16 
   5   6   4    1.75    0.29 
   5   6   4    1.83    0.28 
  -6  -6  -4  215.51    3.84 
   6   6   4  219.85    3.86 
   6   6   4  215.93    3.91 
  -7  -6  -4    0.51    0.25 
   7   6   4    0.44    0.28 
   7   6   4    0.57    0.26 
  -8  -6  -4  121.34    2.45 
   8   6   4  119.74    2.51 
   8   6   4  122.22    2.41 
  -9  -6  -4   10.55    0.63 
   9   6   4    9.44    0.56 
   9   6   4    9.78    0.62 
 -10  -6  -4   35.07    1.16 
  10   6   4   35.74    1.06 
  10   6   4   33.55    1.18 
 -11  -6  -4   43.59    1.37 
  11   6   4   41.13    1.37 
  11   6   4   43.04    1.23 
 -12  -6  -4   27.58    1.15 
  12   6   4   29.32    1.02 
  12   6   4   30.20    1.20 
 -13  -6  -4   45.75    1.54 
  13   6   4   41.34    1.51 
 -14  -6  -4    1.08    0.54 
  14   6   4    1.52    0.55 
  -9   7   4   15.05    0.93 
   8  -7  -4   11.87    0.86 
  -8   7   4   12.05    0.83 
   7  -7  -4   61.88    1.78 
  -7   7   4   59.15    1.69 
   6  -7  -4    1.36    0.41 
  -6   7   4    1.26    0.37 
   5  -7  -4   42.06    1.30 
  -5   7   4   44.04    1.32 
   4  -7  -4   19.49    0.84 
  -4   7   4   18.31    0.81 
   3  -7  -4  163.73    3.20 
  -3   7   4  168.80    3.10 
  -3   7   4  167.63    3.25 
   2  -7  -4    8.54    0.51 
  -2   7   4    8.91    0.47 
  -2   7   4    8.70    0.53 
   1  -7  -4  138.26    2.68 
   1  -7  -4  138.87    2.53 
  -1   7   4  143.07    2.54 
   0  -7  -4   30.11    0.89 
   0  -7  -4   29.39    0.80 
   0   7   4   29.90    0.88 
   0   7   4   29.80    0.74 
  -1  -7  -4   92.12    1.82 
   1   7   4   94.86    1.75 
   1   7   4   92.24    1.89 
  -2  -7  -4   39.61    0.98 
   2   7   4   39.38    0.96 
   2   7   4   39.76    0.89 
   2   7   4   37.98    1.00 
  -3  -7  -4  151.68    2.79 
  -3  -7  -4  150.36    2.68 
   3   7   4  148.55    2.80 
   3   7   4  155.86    2.71 
  -4  -7  -4   14.06    0.51 
   4   7   4   14.13    0.58 
   4   7   4   12.24    0.56 
   4   7   4   13.81    0.46 
  -5  -7  -4    3.33    0.31 
   5   7   4    3.42    0.37 
   5   7   4    3.30    0.36 
   5   7   4    3.30    0.24 
  -6  -7  -4   57.50    1.32 
   6   7   4   59.00    1.42 
   6   7   4   57.67    1.38 
  -7  -7  -4   33.75    0.98 
   7   7   4   34.66    1.01 
   7   7   4   34.34    1.06 
  -8  -7  -4  129.00    2.62 
   8   7   4  130.94    2.70 
   8   7   4  132.21    2.62 
  -9  -7  -4    5.92    0.52 
   9   7   4    4.94    0.46 
   9   7   4    5.56    0.55 
 -10  -7  -4   48.93    1.40 
  10   7   4   50.93    1.37 
  10   7   4   49.69    1.48 
 -11  -7  -4    3.67    0.49 
  11   7   4    3.64    0.44 
  11   7   4    3.56    0.53 
 -12  -7  -4   73.12    1.96 
  12   7   4   70.92    1.98 
  12   7   4   72.55    1.81 
 -13  -7  -4   16.01    0.95 
  13   7   4   17.11    0.95 
  13   7   4   16.06    0.84 
 -14  -7  -4   22.09    1.11 
  14   7   4   22.70    1.17 
  -8   8   4   16.42    0.98 
   7  -8  -4   31.55    1.26 
  -7   8   4   32.19    1.26 
   6  -8  -4   28.60    1.17 
  -6   8   4   29.98    1.16 
   5  -8  -4   49.65    1.50 
  -5   8   4   49.32    1.48 
   4  -8  -4    0.85    0.34 
  -4   8   4    0.25    0.34 
   3  -8  -4   66.50    1.68 
  -3   8   4   66.25    1.69 
   2  -8  -4   35.80    1.11 
  -2   8   4   35.60    1.10 
   1  -8  -4  137.04    2.75 
  -1   8   4  136.28    2.78 
  -1   8   4  146.12    2.62 
   0  -8  -4   -0.10    0.23 
   0  -8  -4    0.51    0.22 
   0   8   4    0.40    0.20 
   0   8   4    0.34    0.23 
  -1  -8  -4   33.48    0.91 
   1   8   4   33.84    0.96 
   1   8   4   34.39    0.85 
   1   8   4   33.14    0.97 
  -2  -8  -4   19.35    0.68 
   2   8   4   20.38    0.69 
   2   8   4   19.83    0.71 
   2   8   4   20.80    0.62 
  -3  -8  -4  159.08    2.91 
  -3  -8  -4  153.74    2.81 
   3   8   4  157.70    2.86 
  -4  -8  -4   19.52    0.63 
   4   8   4   18.85    0.71 
   4   8   4   19.79    0.72 
   4   8   4   19.55    0.62 
  -5  -8  -4   40.67    1.03 
   5   8   4   42.96    0.95 
   5   8   4   41.56    1.12 
   5   8   4   42.63    1.14 
  -6  -8  -4   32.59    0.92 
   6   8   4   31.95    0.98 
   6   8   4   32.55    0.99 
  -7  -8  -4   30.30    0.93 
   7   8   4   30.30    0.98 
   7   8   4   32.11    1.00 
  -8  -8  -4   54.72    1.40 
   8   8   4   53.10    1.46 
   8   8   4   56.37    1.43 
  -9  -8  -4   41.47    1.22 
   9   8   4   39.58    1.19 
   9   8   4   42.20    1.30 
 -10  -8  -4   23.74    0.95 
  10   8   4   22.95    0.90 
  10   8   4   24.94    1.02 
 -11  -8  -4    1.07    0.40 
  11   8   4    1.51    0.45 
  11   8   4    0.64    0.35 
 -12  -8  -4   28.79    1.15 
  12   8   4   27.32    1.16 
  12   8   4   26.10    1.04 
 -13  -8  -4    0.64    0.43 
  13   8   4    1.82    0.51 
  13   8   4    0.94    0.39 
 -14  -8  -4   39.50    1.47 
  14   8   4   38.98    1.51 
  14   8   4   41.34    1.37 
  -7   9   4    3.32    0.61 
   6  -9  -4   37.36    1.40 
  -6   9   4   38.69    1.38 
   5  -9  -4    9.98    0.80 
  -5   9   4   10.78    0.77 
   4  -9  -4   30.05    1.15 
  -4   9   4   31.48    1.17 
   3  -9  -4   47.49    1.43 
  -3   9   4   50.26    1.46 
   2  -9  -4   22.67    0.89 
  -2   9   4   21.99    0.89 
   1  -9  -4   68.75    1.69 
  -1   9   4   72.42    1.75 
   0  -9  -4   55.54    1.40 
   0   9   4   50.73    1.38 
  -1  -9  -4  142.42    2.79 
  -1  -9  -4  139.42    2.66 
   1   9   4  144.84    2.64 
   1   9   4  141.20    2.80 
  -2  -9  -4    1.49    0.30 
   2   9   4    1.85    0.27 
   2   9   4    1.49    0.31 
   2   9   4    1.63    0.30 
  -3  -9  -4   82.30    1.78 
  -3  -9  -4   83.58    1.70 
   3   9   4   79.61    1.80 
   3   9   4   86.94    1.79 
  -4  -9  -4    0.34    0.25 
  -4  -9  -4   -0.23    0.18 
   4   9   4    0.27    0.23 
   4   9   4    0.10    0.24 
  -5  -9  -4  106.29    2.11 
   5   9   4  105.82    2.21 
   5   9   4  105.13    2.19 
  -6  -9  -4   -0.11    0.23 
   6   9   4   -0.09    0.24 
   6   9   4    0.59    0.28 
  -7  -9  -4   46.55    1.21 
   7   9   4   43.88    1.25 
   7   9   4   44.37    1.26 
  -8  -9  -4   29.54    0.96 
   8   9   4   28.48    1.00 
   8   9   4   28.56    1.01 
  -9  -9  -4   14.18    0.71 
   9   9   4   12.56    0.68 
   9   9   4   14.06    0.76 
 -10  -9  -4   16.18    0.81 
  10   9   4   17.98    0.88 
  10   9   4   17.10    0.83 
 -11  -9  -4   18.94    0.90 
  11   9   4   19.14    0.90 
  11   9   4   20.85    0.99 
 -12  -9  -4   18.30    0.94 
  12   9   4   18.20    0.91 
  12   9   4   18.95    0.98 
 -13  -9  -4    7.79    0.76 
  13   9   4    7.56    0.71 
  13   9   4    8.49    0.80 
  14   9   4   36.38    1.48 
  14   9   4   36.31    1.33 
   5 -10  -4    0.58    0.42 
  -5  10   4    0.23    0.45 
   4 -10  -4   54.64    1.65 
  -4  10   4   53.76    1.65 
   3 -10  -4    7.13    0.67 
  -3  10   4    5.79    0.64 
   2 -10  -4   35.80    1.19 
  -2  10   4   33.52    1.19 
   1 -10  -4   18.44    0.84 
  -1  10   4   17.95    0.85 
   0 -10  -4   51.64    1.43 
   0  10   4   52.54    1.44 
  -1 -10  -4   17.79    0.78 
   1  10   4   17.77    0.79 
  -2 -10  -4   50.51    1.26 
   2  10   4   48.82    1.33 
   2  10   4   48.45    1.32 
  -3 -10  -4   81.66    1.81 
   3  10   4   84.08    1.84 
   3  10   4   80.90    1.85 
  -4 -10  -4   12.44    0.64 
  -4 -10  -4   12.68    0.57 
   4  10   4    9.91    0.59 
   4  10   4   12.53    0.59 
  -5 -10  -4  105.42    2.14 
   5  10   4  104.81    2.23 
   5  10   4  105.26    2.24 
  -6 -10  -4   21.86    0.79 
   6  10   4   22.44    0.85 
   6  10   4   21.06    0.84 
  -7 -10  -4   96.68    2.07 
   7  10   4   94.87    2.15 
   7  10   4   95.78    2.13 
  -8 -10  -4    4.88    0.48 
   8  10   4    4.69    0.52 
   8  10   4    4.63    0.50 
  -9 -10  -4   40.65    1.23 
   9  10   4   39.52    1.27 
   9  10   4   40.31    1.28 
 -10 -10  -4    2.48    0.44 
  10  10   4    2.76    0.45 
  10  10   4    3.35    0.50 
 -11 -10  -4   51.13    1.52 
  11  10   4   54.36    1.58 
  11  10   4   52.19    1.61 
 -12 -10  -4    4.65    0.60 
  12  10   4    5.58    0.68 
  12  10   4    5.07    0.61 
 -13 -10  -4   19.98    1.04 
  13  10   4   20.78    1.11 
  13  10   4   17.35    0.93 
   4 -11  -4   34.78    1.35 
  -4  11   4   31.60    1.30 
   3 -11  -4    9.57    0.78 
  -3  11   4    9.45    0.82 
   2 -11  -4   70.46    1.89 
  -2  11   4   69.22    1.93 
   1 -11  -4    5.35    0.56 
  -1  11   4    4.85    0.58 
   0 -11  -4   42.58    1.33 
   0  11   4   44.47    1.38 
  -1 -11  -4    0.22    0.32 
   1  11   4   -0.01    0.33 
  -2 -11  -4  119.61    2.53 
   2  11   4  117.08    2.54 
  -3 -11  -4    6.63    0.53 
   3  11   4    5.32    0.51 
   3  11   4    6.61    0.56 
  -4 -11  -4   22.00    0.86 
   4  11   4   23.23    0.90 
   4  11   4   25.84    0.88 
  -5 -11  -4   42.97    1.25 
   5  11   4   44.07    1.26 
  -6 -11  -4   61.53    1.50 
   6  11   4   60.81    1.60 
   6  11   4   62.04    1.58 
  -7 -11  -4   43.39    1.21 
   7  11   4   42.66    1.32 
   7  11   4   41.96    1.27 
  -8 -11  -4   20.63    0.86 
   8  11   4   22.37    0.95 
   8  11   4   22.68    0.94 
  -9 -11  -4   45.50    1.35 
   9  11   4   45.79    1.38 
   9  11   4   41.89    1.37 
 -10 -11  -4    1.71    0.43 
  10  11   4    2.58    0.50 
  10  11   4    1.69    0.44 
 -11 -11  -4   77.94    2.02 
  11  11   4   81.12    2.07 
  11  11   4   76.40    2.04 
 -12 -11  -4    5.90    0.67 
  12  11   4    4.76    0.64 
 -13 -11  -4   34.71    1.35 
   3 -12  -4   21.31    1.09 
   2 -12  -4   19.14    0.97 
  -2  12   4   20.48    1.06 
   1 -12  -4   14.40    0.86 
  -1  12   4   14.36    0.85 
   0 -12  -4   63.30    1.75 
   0  12   4   64.67    1.81 
  -1 -12  -4    3.38    0.50 
   1  12   4    3.33    0.52 
  -2 -12  -4   36.80    1.21 
   2  12   4   35.03    1.21 
  -3 -12  -4   14.67    0.77 
   3  12   4   13.88    0.78 
  -4 -12  -4   72.26    1.77 
   4  12   4   72.35    1.78 
   4  12   4   71.70    1.79 
  -5 -12  -4    9.09    0.64 
   5  12   4    9.60    0.65 
  -6 -12  -4   84.60    2.04 
   6  12   4   85.00    2.01 
   7  12   4    6.21    0.58 
   7  12   4    4.85    0.56 
  -8 -12  -4   80.99    1.95 
   8  12   4   83.50    2.09 
   8  12   4   84.10    2.03 
  -9 -12  -4   13.39    0.78 
   9  12   4   13.40    0.78 
   9  12   4   12.63    0.83 
 -10 -12  -4   43.85    1.37 
  10  12   4   41.74    1.43 
 -11 -12  -4   43.47    1.44 
  11  12   4   42.48    1.47 
 -12 -12  -4   23.81    1.13 
  12  12   4   22.95    1.12 
 -13 -12  -4   12.64    0.89 
   1 -13  -4   30.80    1.26 
  -1  13   4   28.35    1.27 
   0 -13  -4   19.47    0.98 
   0  13   4   17.48    1.00 
  -1 -13  -4   30.55    1.17 
   1  13   4   29.10    1.20 
  -2 -13  -4   50.11    1.51 
   2  13   4   48.76    1.53 
  -3 -13  -4   32.76    1.16 
   3  13   4   31.86    1.18 
  -4 -13  -4   15.28    0.81 
  -5 -13  -4   12.79    0.78 
   5  13   4   12.59    0.78 
  -6 -13  -4   66.84    1.78 
   6  13   4   66.90    1.78 
  -7 -13  -4    4.80    0.59 
   7  13   4    4.42    0.55 
   8  13   4   72.09    1.95 
   9  13   4    9.46    0.78 
  10  13   4   52.70    1.68 
 -11 -13  -4    3.57    0.56 
  11  13   4    3.49    0.58 
 -12 -13  -4   39.44    1.45 
   0 -14  -4    4.09    0.62 
  -1 -14  -4   38.53    1.39 
   1  14   4   40.02    1.48 
  -2 -14  -4    5.43    0.65 
   2  14   4    6.34    0.73 
  -3 -14  -4   20.81    0.99 
   3  14   4   21.95    1.04 
  -6 -14  -4   14.70    0.86 
  -7 -14  -4   15.48    0.89 
  -8 -14  -4   39.62    1.42 
  -9 -14  -4   27.57    1.20 
   9  14   4   28.00    1.21 
  -8 -15  -4    6.49    0.73 
   9  13  -5   15.37    0.94 
   8  13  -5    9.57    0.80 
  -8 -13   5    7.79    0.79 
  -7 -13   5    4.50    0.65 
   6  13  -5   14.10    0.93 
  -6 -13   5   13.68    0.91 
   5  13  -5   53.08    1.73 
   4  13  -5    3.62    0.63 
  -4 -13   5    5.89    0.70 
   3  13  -5   26.79    1.23 
  -3 -13   5   26.76    1.21 
   2  13  -5    3.95    0.65 
  -2 -13   5    3.53    0.63 
   1  13  -5   28.67    1.31 
  10  12  -5   34.49    1.35 
 -10 -12   5   35.28    1.40 
   9  12  -5    7.73    0.75 
  -9 -12   5    7.68    0.74 
   8  12  -5   57.70    1.69 
  -8 -12   5   56.81    1.75 
   7  12  -5    7.86    0.71 
  -7 -12   5    7.81    0.75 
   6  12  -5   26.44    1.12 
   6  12  -5   25.77    1.03 
   5  12  -5   12.33    0.83 
  -5 -12   5   11.75    0.79 
   4  12  -5   32.14    1.26 
  -4 -12   5   31.81    1.22 
   3  12  -5   45.35    1.55 
  -3 -12   5   48.61    1.55 
   2  12  -5    5.44    0.65 
  -2 -12   5    4.66    0.64 
   1  12  -5   16.30    0.97 
  -1 -12   5   14.19    0.93 
   0  12  -5    1.52    0.53 
   0 -12   5    1.58    0.54 
  -1  12  -5   39.86    1.54 
  11  11  -5    8.55    0.79 
 -11 -11   5    9.93    0.84 
  10  11  -5   34.70    1.31 
 -10 -11   5   37.05    1.38 
   9  11  -5    2.18    0.48 
  -9 -11   5    1.57    0.45 
   8  11  -5   93.95    2.26 
  -8 -11   5   94.28    2.35 
   7  11  -5    0.65    0.38 
  -7 -11   5    0.96    0.41 
   6  11  -5   46.72    1.48 
   6  11  -5   46.28    1.38 
   5  11  -5    6.35    0.62 
   5  11  -5    8.66    0.64 
  -5 -11   5    6.31    0.62 
   4  11  -5   63.41    1.79 
  -4 -11   5   64.64    1.75 
   3  11  -5   18.42    0.91 
  -3 -11   5   19.63    0.93 
   2  11  -5   53.34    1.63 
  -2 -11   5   56.62    1.64 
   1  11  -5   18.48    0.97 
  -1 -11   5   17.78    0.96 
   0  11  -5   21.61    1.06 
   0 -11   5   19.89    1.02 
  -1  11  -5   26.88    1.21 
   1 -11   5   26.58    1.19 
  -2  11  -5   30.04    1.31 
   2 -11   5   29.43    1.28 
  -3  11  -5   56.35    1.87 
  12  10  -5    9.51    0.82 
 -12 -10   5   11.12    0.82 
  11  10  -5   61.39    1.79 
 -11 -10   5   60.33    1.81 
  10  10  -5   19.67    0.97 
 -10 -10   5   20.09    1.00 
   9  10  -5   37.23    1.28 
  -9 -10   5   36.98    1.33 
   8  10  -5   67.47    1.77 
  -8 -10   5   66.31    1.82 
   7  10  -5   47.46    1.41 
  -7 -10   5   51.57    1.52 
   6  10  -5   85.77    2.11 
   6  10  -5   87.81    2.01 
  -6 -10   5   83.42    2.09 
  -6 -10   5   87.88    2.03 
   5  10  -5    0.45    0.31 
   5  10  -5    0.81    0.38 
  -5 -10   5    1.10    0.37 
   4  10  -5   26.80    0.91 
   4  10  -5   24.53    1.02 
  -4 -10   5   26.89    1.01 
   3  10  -5    0.79    0.37 
  -3 -10   5    0.85    0.36 
   2  10  -5  114.17    2.58 
  -2 -10   5  110.04    2.52 
   1  10  -5   -0.05    0.35 
  -1 -10   5   -0.08    0.36 
   0  10  -5   44.02    1.45 
   0 -10   5   43.63    1.43 
  -1  10  -5    6.76    0.69 
   1 -10   5    6.39    0.66 
  -2  10  -5   58.16    1.78 
   2 -10   5   57.08    1.73 
  -3  10  -5   15.64    0.97 
   3 -10   5   14.57    0.90 
  -4  10  -5   57.66    1.86 
   4 -10   5   52.48    1.73 
 -13  -9   5   27.13    1.26 
  12   9  -5    5.19    0.65 
 -12  -9   5    5.31    0.67 
  11   9  -5   99.16    2.39 
 -11  -9   5   96.76    2.43 
  10   9  -5    0.12    0.36 
 -10  -9   5    0.05    0.35 
   9   9  -5   65.92    1.76 
  -9  -9   5   67.37    1.81 
   8   9  -5    3.61    0.48 
  -8  -9   5    4.49    0.54 
   7   9  -5   51.54    1.42 
  -7  -9   5   50.37    1.48 
   6   9  -5   24.31    0.91 
  -6  -9   5   25.16    0.91 
  -6  -9   5   25.52    0.98 
   5   9  -5   53.18    1.39 
   5   9  -5   56.88    1.52 
  -5  -9   5   55.00    1.45 
   4   9  -5   49.47    1.27 
   4   9  -5   49.69    1.41 
  -4  -9   5   47.39    1.35 
   3   9  -5   14.05    0.74 
   3   9  -5   15.00    0.65 
  -3  -9   5   14.93    0.74 
   2   9  -5   61.33    1.65 
  -2  -9   5   62.77    1.64 
   1   9  -5   62.56    1.68 
  -1  -9   5   63.56    1.68 
   0   9  -5   99.88    2.38 
   0  -9   5  103.53    2.37 
  -1   9  -5    7.75    0.69 
   1  -9   5    8.50    0.63 
  -2   9  -5   41.59    1.40 
   2  -9   5   39.66    1.35 
  -3   9  -5    0.94    0.44 
   3  -9   5    2.35    0.47 
  -4   9  -5   92.77    2.41 
   4  -9   5   85.70    2.25 
  -5   9  -5    0.08    0.45 
   5  -9   5    0.12    0.38 
  -6   9  -5   40.34    1.59 
  13   8  -5    7.80    0.74 
 -13  -8   5    6.98    0.77 
  12   8  -5   12.42    0.80 
 -12  -8   5   10.64    0.77 
  11   8  -5   29.52    1.12 
 -11  -8   5   32.19    1.23 
  10   8  -5   46.05    1.39 
 -10  -8   5   45.58    1.45 
   9   8  -5   45.25    1.35 
  -9  -8   5   44.02    1.36 
   8   8  -5    7.14    0.59 
  -8  -8   5    6.83    0.59 
   7   8  -5   59.50    1.52 
  -7  -8   5   60.56    1.60 
   6   8  -5    0.10    0.26 
  -6  -8   5    0.19    0.29 
  -6  -8   5    0.08    0.26 
   5   8  -5  195.57    3.65 
   5   8  -5  197.84    3.81 
  -5  -8   5  201.08    3.70 
   4   8  -5    0.70    0.29 
   4   8  -5    0.15    0.28 
  -4  -8   5    0.47    0.28 
   3   8  -5  106.26    2.08 
   3   8  -5   98.72    2.23 
  -3  -8   5  105.18    2.23 
   2   8  -5   70.16    1.73 
   2   8  -5   71.85    1.50 
  -2  -8   5   67.75    1.69 
   1   8  -5   94.10    2.17 
  -1  -8   5   99.77    2.18 
   0   8  -5   31.75    1.10 
   0  -8   5   32.34    1.10 
  -1   8  -5   77.73    1.93 
   1  -8   5   75.39    1.87 
  -2   8  -5   24.69    1.00 
   2  -8   5   23.27    0.95 
   2  -8   5   24.82    0.86 
  -3   8  -5    5.12    0.60 
   3  -8   5    4.90    0.56 
   3  -8   5    5.34    0.52 
  -4   8  -5   35.22    1.32 
   4  -8   5   32.01    1.18 
   4  -8   5   35.82    1.16 
  -5   8  -5   27.23    1.22 
   5  -8   5   26.06    1.09 
   5  -8   5   27.47    1.13 
  -6   8  -5   58.45    1.86 
   6  -8   5   61.21    1.74 
   6  -8   5   59.69    1.78 
  -7   8  -5    2.77    0.61 
   7  -8   5    1.90    0.53 
   7  -8   5    2.52    0.57 
  14   7  -5   48.71    1.58 
  13   7  -5    0.17    0.42 
 -13  -7   5    0.04    0.43 
  12   7  -5   20.63    0.93 
 -12  -7   5   19.07    0.98 
  11   7  -5    8.26    0.62 
 -11  -7   5    7.14    0.67 
  10   7  -5   46.15    1.38 
 -10  -7   5   45.73    1.41 
   9   7  -5   22.52    0.90 
  -9  -7   5   20.93    0.91 
   8   7  -5   91.90    2.10 
  -8  -7   5   98.62    2.19 
   7   7  -5    4.48    0.44 
  -7  -7   5    5.82    0.47 
  -7  -7   5    5.47    0.50 
   6   7  -5    8.69    0.55 
  -6  -7   5    8.25    0.56 
  -6  -7   5    9.56    0.57 
   5   7  -5   86.69    1.86 
   5   7  -5   86.07    1.94 
  -5  -7   5   87.93    1.88 
   4   7  -5   59.69    1.47 
   4   7  -5   57.92    1.36 
  -4  -7   5   58.75    1.42 
   3   7  -5  213.93    3.73 
   3   7  -5  209.44    3.93 
  -3  -7   5  212.03    3.88 
   2   7  -5    4.74    0.45 
   2   7  -5    4.39    0.36 
  -2  -7   5    5.27    0.46 
   1   7  -5   72.81    1.45 
   1   7  -5   68.88    1.68 
  -1  -7   5   71.39    1.67 
   0   7  -5    8.80    0.55 
   0  -7   5    7.77    0.56 
   0  -7   5    8.15    0.44 
  -1   7  -5  202.54    3.92 
   1  -7   5  202.42    3.86 
   1  -7   5  205.92    3.61 
  -2   7  -5    4.85    0.53 
   2  -7   5    3.97    0.42 
   2  -7   5    3.77    0.46 
  -3   7  -5   56.46    1.61 
   3  -7   5   53.21    1.50 
   3  -7   5   54.85    1.40 
  -4   7  -5   23.11    1.03 
   4  -7   5   22.30    0.92 
   4  -7   5   23.12    0.89 
  -5   7  -5   29.71    1.21 
   5  -7   5   31.46    1.14 
   5  -7   5   28.60    1.07 
  -6   7  -5   12.18    0.82 
   6  -7   5   10.97    0.75 
   6  -7   5   12.23    0.78 
  -7   7  -5   32.37    1.37 
   7  -7   5   33.01    1.25 
   7  -7   5   33.41    1.26 
  -8   7  -5    9.02    0.90 
   8  -7   5   10.78    0.90 
   8  -7   5    8.79    0.78 
  14   6  -5   42.04    1.41 
 -14  -6   5   39.60    1.53 
  13   6  -5   10.25    0.74 
 -13  -6   5   10.49    0.81 
  12   6  -5   38.11    1.27 
 -12  -6   5   36.74    1.32 
  11   6  -5    8.80    0.65 
 -11  -6   5    9.08    0.69 
  10   6  -5   20.64    0.87 
 -10  -6   5   19.44    0.89 
   9   6  -5    3.42    0.44 
  -9  -6   5    3.98    0.49 
   8   6  -5   95.51    2.06 
  -8  -6   5   91.88    2.10 
   7   6  -5    2.70    0.36 
  -7  -6   5    3.12    0.37 
  -7  -6   5    2.79    0.37 
   6   6  -5   45.73    1.20 
  -6  -6   5   45.95    1.23 
  -6  -6   5   46.56    1.18 
   5   6  -5   87.84    1.89 
   5   6  -5   88.63    1.83 
  -5  -6   5   83.65    1.82 
   4   6  -5   76.37    1.61 
   4   6  -5   75.93    1.70 
  -4  -6   5   74.75    1.64 
   3   6  -5   60.70    1.32 
   3   6  -5   57.81    1.41 
  -3  -6   5   59.67    1.38 
   2   6  -5   88.58    1.71 
   2   6  -5   89.77    1.89 
  -2  -6   5   86.81    1.54 
  -2  -6   5   82.34    1.82 
   1   6  -5   91.30    2.00 
   1   6  -5   96.11    1.78 
  -1  -6   5   94.15    1.71 
  -1  -6   5   92.50    1.97 
   0   6  -5    4.69    0.44 
   0   6  -5    4.89    0.31 
   0  -6   5    3.85    0.39 
   0  -6   5    4.67    0.34 
  -1   6  -5  104.68    2.25 
   1  -6   5  105.43    2.00 
   1  -6   5  102.64    2.19 
  -2   6  -5   23.27    0.91 
   2  -6   5   24.74    0.80 
   2  -6   5   22.02    0.83 
  -3   6  -5   67.22    1.77 
   3  -6   5   70.31    1.60 
   3  -6   5   71.62    1.71 
  -4   6  -5    0.98    0.35 
   4  -6   5    1.24    0.34 
   4  -6   5    0.52    0.31 
  -5   6  -5   29.30    1.15 
   5  -6   5   27.77    1.03 
   5  -6   5   30.21    1.04 
  -6   6  -5    1.87    0.48 
   6  -6   5    1.69    0.43 
   6  -6   5    2.15    0.43 
  -7   6  -5   56.86    1.79 
   7  -6   5   57.03    1.66 
   7  -6   5   56.45    1.61 
  -8   6  -5    6.34    0.76 
   8  -6   5    6.15    0.64 
   8  -6   5    5.56    0.68 
  -9   6  -5   29.73    1.38 
   9  -6   5   31.16    1.22 
 -14  -5   5   32.03    1.37 
  13   5  -5   29.57    1.12 
 -13  -5   5   30.16    1.26 
  12   5  -5   27.43    1.04 
 -12  -5   5   27.25    1.14 
  11   5  -5   18.66    0.83 
 -11  -5   5   17.04    0.85 
  10   5  -5   66.07    1.65 
 -10  -5   5   66.39    1.74 
   9   5  -5    7.41    0.55 
  -9  -5   5    8.27    0.56 
   8   5  -5  117.83    2.42 
  -8  -5   5  119.34    2.48 
   7   5  -5    6.75    0.49 
  -7  -5   5    7.06    0.47 
  -7  -5   5    6.64    0.45 
   6   5  -5  108.51    2.20 
  -6  -5   5  110.95    2.25 
  -6  -5   5  110.90    2.17 
   5   5  -5   13.48    0.55 
  -5  -5   5   12.06    0.57 
  -5  -5   5   11.88    0.56 
   4   5  -5   30.49    0.86 
  -4  -5   5   33.99    0.91 
   3   5  -5   23.63    0.74 
   3   5  -5   23.19    0.70 
  -3  -5   5   23.01    0.74 
   2   5  -5  111.72    2.20 
   2   5  -5  110.22    2.06 
  -2  -5   5  111.56    1.86 
  -2  -5   5  110.38    2.17 
   1   5  -5   10.41    0.50 
   1   5  -5   10.21    0.41 
  -1  -5   5   10.36    0.49 
  -1  -5   5   10.39    0.36 
   0   5  -5  111.49    1.99 
   0   5  -5  109.02    2.26 
   0  -5   5  115.04    2.25 
   0  -5   5  113.89    2.02 
  -1   5  -5  142.68    2.37 
  -1   5  -5  135.10    2.74 
   1  -5   5  138.15    2.69 
   1  -5   5  143.85    2.52 
  -2   5  -5   33.24    1.04 
   2  -5   5   35.09    1.00 
   2  -5   5   33.85    0.91 
  -3   5  -5   74.41    1.77 
   3  -5   5   69.74    1.57 
   3  -5   5   70.11    1.66 
  -4   5  -5   54.27    1.52 
   4  -5   5   51.81    1.38 
   4  -5   5   53.94    1.36 
  -5   5  -5   76.84    1.98 
   5  -5   5   78.29    1.84 
   5  -5   5   77.46    1.81 
  -6   5  -5    1.00    0.39 
   6  -5   5   -0.18    0.32 
   6  -5   5    0.48    0.31 
  -7   5  -5   34.60    1.31 
   7  -5   5   35.36    1.23 
   7  -5   5   36.44    1.19 
  -8   5  -5    1.95    0.51 
   8  -5   5    1.60    0.42 
   8  -5   5    2.05    0.50 
  -9   5  -5   41.03    1.55 
   9  -5   5   41.76    1.49 
   9  -5   5   41.80    1.36 
 -14  -4   5    4.83    0.70 
 -13  -4   5   31.13    1.26 
  12   4  -5    3.16    0.47 
 -12  -4   5    2.42    0.50 
  11   4  -5   59.91    1.55 
 -11  -4   5   57.48    1.64 
  10   4  -5   34.69    1.08 
 -10  -4   5   34.65    1.16 
   9   4  -5   36.54    1.03 
   9   4  -5   35.75    1.07 
  -9  -4   5   35.26    1.11 
   8   4  -5  116.32    2.33 
   8   4  -5  109.51    2.19 
  -8  -4   5  121.25    2.20 
  -8  -4   5  109.88    2.36 
   7   4  -5   45.04    1.04 
   7   4  -5   45.63    1.18 
  -7  -4   5   47.34    1.10 
  -7  -4   5   44.00    1.19 
   6   4  -5  129.59    2.49 
   6   4  -5  132.36    2.29 
  -6  -4   5  132.98    2.45 
  -6  -4   5  126.61    2.53 
   5   4  -5   33.57    0.68 
   5   4  -5   31.98    0.88 
  -5  -4   5   31.98    0.89 
  -5  -4   5   33.49    0.90 
   4   4  -5  164.07    2.97 
   4   4  -5  161.36    2.57 
   4   4  -5  159.93    2.90 
  -4  -4   5  160.43    2.95 
   3   4  -5    0.47    0.17 
   3   4  -5    0.93    0.22 
  -3  -4   5    0.96    0.22 
   2   4  -5  160.02    2.71 
   2   4  -5  151.74    2.80 
  -2  -4   5  147.14    2.78 
   1   4  -5    0.44    0.15 
   1   4  -5    0.28    0.17 
  -1  -4   5    0.48    0.18 
  -1  -4   5    0.36    0.12 
   0   4  -5  300.92    4.81 
   0   4  -5  292.03    5.08 
   0  -4   5  289.87    5.05 
   0  -4   5  296.52    4.78 
  -1   4  -5   71.97    1.27 
  -1   4  -5   67.49    1.54 
   1  -4   5   69.03    1.36 
   1  -4   5   69.10    1.51 
  -2   4  -5  171.30    2.74 
  -2   4  -5  165.88    3.19 
   2  -4   5  170.45    3.11 
   2  -4   5  163.71    2.96 
  -3   4  -5   21.77    0.84 
   3  -4   5   23.03    0.74 
   3  -4   5   22.21    0.77 
  -4   4  -5  105.28    2.33 
   4  -4   5  107.55    2.21 
   4  -4   5  108.49    2.17 
  -5   4  -5   33.16    1.13 
   5  -4   5   33.18    1.02 
   5  -4   5   32.77    1.02 
  -6   4  -5   25.70    1.04 
   6  -4   5   25.04    0.96 
   6  -4   5   24.72    0.89 
  -7   4  -5   69.62    1.91 
   7  -4   5   74.39    1.75 
   7  -4   5   68.56    1.80 
  -8   4  -5    3.33    0.53 
   8  -4   5    3.70    0.46 
   8  -4   5    2.78    0.49 
  -9   4  -5   32.60    1.34 
   9  -4   5   34.99    1.32 
 -10   4  -5    5.18    0.71 
  10  -4   5    4.37    0.67 
 -14  -3   5    3.90    0.68 
 -13  -3   5   43.07    1.51 
  12   3  -5    0.58    0.33 
 -12  -3   5    0.10    0.40 
  11   3  -5   73.52    1.71 
  11   3  -5   69.92    1.76 
 -11  -3   5   65.72    1.82 
  10   3  -5    3.19    0.43 
  10   3  -5    3.44    0.42 
 -10  -3   5    3.54    0.48 
   9   3  -5  188.52    3.53 
   9   3  -5  194.21    3.53 
  -9  -3   5  189.85    3.67 
   8   3  -5   71.37    1.60 
   8   3  -5   69.50    1.54 
  -8  -3   5   73.29    1.50 
  -8  -3   5   68.55    1.64 
   7   3  -5  152.77    2.74 
   7   3  -5  151.04    2.84 
  -7  -3   5  153.51    2.76 
  -7  -3   5  150.18    2.89 
   6   3  -5   62.12    1.26 
   6   3  -5   64.20    1.41 
  -6  -3   5   63.75    1.35 
  -6  -3   5   62.47    1.41 
   5   3  -5  270.02    4.58 
   5   3  -5  265.96    4.36 
  -5  -3   5  272.29    4.59 
  -5  -3   5  266.06    4.63 
   4   3  -5   24.44    0.51 
  -4  -3   5   26.05    0.72 
  -4  -3   5   24.17    0.72 
   3   3  -5  106.74    1.99 
   3   3  -5  106.24    2.01 
  -3  -3   5  106.63    2.04 
   2   3  -5  295.87    4.90 
   2   3  -5  296.09    5.00 
  -2  -3   5  298.53    5.02 
   1   3  -5   18.16    0.52 
   1   3  -5   17.42    0.56 
  -1  -3   5   19.09    0.39 
  -1  -3   5   17.92    0.59 
   0   3  -5  168.67    2.80 
   0   3  -5  163.76    2.98 
   0  -3   5  165.23    2.74 
   0  -3   5  164.92    2.96 
  -1   3  -5  127.56    2.46 
  -1   3  -5  130.89    2.22 
   1  -3   5  133.77    2.28 
  -2   3  -5  151.30    2.49 
  -2   3  -5  149.05    2.86 
   2  -3   5  150.84    2.66 
   2  -3   5  152.54    2.78 
  -3   3  -5   10.29    0.28 
  -3   3  -5   11.44    0.56 
   3  -3   5   10.55    0.50 
   3  -3   5   10.68    0.49 
  -4   3  -5  219.00    4.10 
   4  -3   5  223.89    3.95 
   4  -3   5  222.18    3.91 
  -5   3  -5    1.21    0.34 
   5  -3   5    1.46    0.29 
   5  -3   5    1.55    0.34 
  -6   3  -5   97.00    2.24 
   6  -3   5   97.12    2.05 
   6  -3   5   98.23    2.14 
  -7   3  -5   32.90    1.19 
   7  -3   5   35.82    1.06 
   7  -3   5   35.41    1.17 
  -8   3  -5   29.24    1.14 
   8  -3   5   26.52    1.05 
   8  -3   5   30.54    0.99 
  -9   3  -5   26.39    1.16 
   9  -3   5   28.60    1.16 
 -10   3  -5   43.69    1.58 
  10  -3   5   44.90    1.54 
 -11   3  -5   19.01    1.12 
  11  -3   5   19.53    1.11 
 -14  -2   5   23.05    1.20 
  13   2  -5   14.15    0.91 
 -13  -2   5   15.74    0.97 
  12   2  -5   25.28    1.08 
 -12  -2   5   27.61    1.15 
  11   2  -5   78.95    1.83 
  11   2  -5   81.11    1.98 
 -11  -2   5   81.79    2.05 
  10   2  -5   30.58    0.96 
  10   2  -5   32.70    1.07 
 -10  -2   5   31.68    1.11 
   9   2  -5   65.11    1.51 
   9   2  -5   65.42    1.57 
  -9  -2   5   63.24    1.61 
   8   2  -5   39.58    1.06 
   8   2  -5   41.21    1.09 
  -8  -2   5   40.39    1.01 
  -8  -2   5   40.64    1.14 
   7   2  -5  240.91    4.18 
   7   2  -5  241.56    4.23 
  -7  -2   5  251.04    4.21 
  -7  -2   5  240.02    4.33 
   6   2  -5    5.62    0.39 
   6   2  -5    5.08    0.34 
  -6  -2   5    4.87    0.37 
  -6  -2   5    4.51    0.37 
   5   2  -5  324.58    5.34 
   5   2  -5  314.11    5.17 
  -5  -2   5  324.04    5.39 
  -5  -2   5  310.58    5.33 
   4   2  -5   14.72    0.40 
   4   2  -5   16.43    0.55 
  -4  -2   5   15.64    0.52 
  -4  -2   5   15.56    0.54 
   3   2  -5  369.47    6.01 
   3   2  -5  356.10    5.68 
   3   2  -5  364.35    5.95 
  -3  -2   5  362.73    6.04 
   2   2  -5  138.41    2.46 
   2   2  -5  140.20    2.48 
  -2  -2   5  142.38    2.55 
   1   2  -5  146.06    2.57 
   1   2  -5  144.82    2.52 
  -1  -2   5  147.74    2.62 
   0   2  -5  125.29    2.15 
   0   2  -5  121.81    2.25 
   0  -2   5  124.89    2.26 
   0  -2   5  122.40    2.05 
  -1   2  -5  172.54    2.86 
  -1   2  -5  168.65    3.05 
   1  -2   5  171.31    2.86 
   1  -2   5  172.21    3.01 
  -2   2  -5   44.62    1.07 
  -2   2  -5   44.36    0.86 
   2  -2   5   42.87    0.96 
  -3   2  -5   73.17    1.62 
  -3   2  -5   74.57    1.33 
   3  -2   5   75.68    1.54 
   3  -2   5   76.26    1.52 
  -4   2  -5  122.96    2.06 
  -4   2  -5  122.42    2.46 
   4  -2   5  124.00    2.35 
   4  -2   5  123.96    2.33 
  -5   2  -5   10.45    0.57 
   5  -2   5   10.43    0.55 
   5  -2   5    9.72    0.50 
  -6   2  -5   72.78    1.81 
   6  -2   5   77.50    1.64 
   6  -2   5   74.68    1.73 
  -7   2  -5   19.48    0.88 
   7  -2   5   20.80    0.87 
   7  -2   5   18.48    0.71 
  -8   2  -5   97.84    2.35 
   8  -2   5  104.00    2.12 
   8  -2   5   98.32    2.29 
  -9   2  -5    4.97    0.62 
   9  -2   5    5.72    0.63 
 -10   2  -5   81.29    2.21 
  10  -2   5   82.97    2.17 
 -11   2  -5    0.52    0.48 
  11  -2   5    0.65    0.49 
  14   1  -5   22.38    1.19 
 -14  -1   5   25.50    1.27 
  13   1  -5    0.60    0.48 
 -13  -1   5    0.12    0.47 
  12   1  -5   39.69    1.38 
 -12  -1   5   42.21    1.44 
  11   1  -5   35.03    1.24 
 -11  -1   5   37.99    1.30 
  10   1  -5   79.36    1.75 
  10   1  -5   82.08    1.94 
 -10  -1   5   77.28    1.93 
   9   1  -5   23.05    0.88 
   9   1  -5   23.52    0.79 
  -9  -1   5   23.88    0.78 
  -9  -1   5   24.27    0.91 
   8   1  -5  122.35    2.36 
   8   1  -5  121.59    2.43 
  -8  -1   5  118.85    2.47 
  -8  -1   5  124.51    2.35 
   7   1  -5   69.42    1.49 
   7   1  -5   70.26    1.51 
  -7  -1   5   68.01    1.56 
  -7  -1   5   69.42    1.47 
   6   1  -5   84.45    1.72 
   6   1  -5   86.59    1.70 
  -6  -1   5   84.37    1.70 
  -6  -1   5   88.49    1.76 
   5   1  -5  373.84    6.15 
   5   1  -5  366.50    6.05 
  -5  -1   5  368.52    6.21 
  -5  -1   5  382.18    6.19 
   4   1  -5  108.19    1.91 
   4   1  -5  108.95    2.04 
  -4  -1   5  111.92    2.05 
  -4  -1   5  111.53    2.02 
   3   1  -5  140.12    2.51 
   3   1  -5  145.85    2.35 
  -3  -1   5  141.66    2.54 
  -3  -1   5  142.25    2.49 
   2   1  -5  101.52    1.86 
   2   1  -5  100.31    1.81 
   2   1  -5  102.79    1.65 
   1   1  -5  195.38    3.31 
   1   1  -5  198.92    3.32 
  -1  -1   5  196.19    3.40 
   0   1  -5   40.63    0.87 
   0   1  -5   40.12    0.87 
   0  -1   5   40.80    0.92 
   0  -1   5   43.09    0.78 
  -1   1  -5  453.20    7.37 
  -1   1  -5  466.58    7.55 
   1  -1   5  471.93    7.33 
   1  -1   5  453.43    7.51 
  -2   1  -5    5.71    0.35 
  -2   1  -5    5.34    0.27 
   2  -1   5    5.37    0.31 
   2  -1   5    4.62    0.30 
  -3   1  -5   63.99    1.18 
  -3   1  -5   62.33    1.37 
   3  -1   5   63.13    1.29 
   3  -1   5   62.40    1.30 
  -4   1  -5   56.29    1.06 
  -4   1  -5   55.74    1.31 
   4  -1   5   53.80    1.18 
   4  -1   5   55.26    1.25 
  -5   1  -5   94.32    2.06 
  -5   1  -5  104.64    1.74 
   5  -1   5   97.36    1.90 
   5  -1   5   97.23    2.00 
  -6   1  -5  126.97    2.64 
   6  -1   5  129.68    2.58 
   6  -1   5  132.29    2.44 
  -7   1  -5  105.36    2.36 
   7  -1   5  111.40    2.14 
   7  -1   5  106.89    2.30 
  -8   1  -5   29.02    1.11 
   8  -1   5   32.13    1.11 
   8  -1   5   32.03    0.92 
  -9   1  -5   30.97    1.19 
   9  -1   5   32.34    1.16 
 -10   1  -5   75.30    2.06 
  10  -1   5   76.23    2.02 
 -11   1  -5    5.45    0.66 
  11  -1   5    5.87    0.71 
 -12   1  -5   26.55    1.25 
  12  -1   5   25.47    1.24 
  13   0  -5    3.75    0.68 
 -13   0   5    5.63    0.73 
  12   0  -5   18.87    1.00 
 -12   0   5   20.12    1.06 
  11   0  -5    0.19    0.38 
 -11   0   5    0.37    0.38 
  10   0  -5   75.48    1.88 
 -10   0   5   74.74    1.89 
   9   0  -5    9.48    0.50 
   9   0  -5   10.14    0.64 
  -9   0   5    9.05    0.62 
  -9   0   5   10.06    0.54 
   8   0  -5   55.47    1.41 
   8   0  -5   55.72    1.29 
  -8   0   5   57.20    1.42 
  -8   0   5   55.73    1.31 
   7   0  -5   16.41    0.60 
   7   0  -5   15.85    0.66 
  -7   0   5   16.17    0.62 
  -7   0   5   17.19    0.69 
   6   0  -5  176.10    3.11 
   6   0  -5  173.63    3.14 
  -6   0   5  176.48    3.19 
  -6   0   5  177.53    3.15 
   5   0  -5   21.83    0.65 
   5   0  -5   22.09    0.64 
  -5   0   5   22.77    0.66 
  -5   0   5   22.56    0.65 
   4   0  -5  156.48    2.75 
   4   0  -5  155.95    2.69 
  -4   0   5  155.50    2.73 
  -4   0   5  158.50    2.78 
   3   0  -5  123.07    2.23 
   3   0  -5  128.24    2.13 
  -3   0   5  123.44    2.25 
  -3   0   5  124.28    2.17 
   2   0  -5  558.71    9.19 
   2   0  -5  592.84    9.04 
  -2   0   5  569.30    9.30 
  -2   0   5  584.09    9.22 
   1   0  -5   78.22    1.38 
  -1   0   5   77.97    1.33 
   0   0  -5  130.97    2.25 
   0   0  -5  133.49    2.32 
   0   0   5  132.85    2.19 
  -1   0  -5  552.53    8.69 
  -1   0  -5  544.09    8.79 
   1   0   5  534.45    8.61 
   1   0   5  548.64    8.79 
  -2   0  -5    5.05    0.30 
  -2   0  -5    4.37    0.26 
   2   0   5    4.16    0.27 
   2   0   5    4.68    0.28 
  -3   0  -5  135.42    2.44 
  -3   0  -5  133.80    2.28 
   3   0   5  131.32    2.37 
   3   0   5  129.71    2.33 
  -4   0  -5   69.68    1.30 
  -4   0  -5   65.66    1.47 
   4   0   5   69.58    1.45 
   4   0   5   70.22    1.36 
  -5   0  -5  124.91    2.47 
  -5   0  -5  126.83    2.19 
   5   0   5  126.19    2.27 
   5   0   5  123.55    2.40 
  -6   0  -5   32.05    0.99 
   6   0   5   31.21    0.95 
   6   0   5   31.99    0.81 
  -7   0  -5  129.24    2.69 
   7   0   5  127.84    2.63 
   7   0   5  133.13    2.42 
  -8   0  -5    3.23    0.46 
   8   0   5    2.93    0.43 
  -9   0  -5   58.25    1.67 
   9   0   5   60.28    1.65 
 -10   0  -5   31.05    1.21 
  10   0   5   30.74    1.19 
 -11   0  -5   16.57    0.96 
  11   0   5   16.62    0.96 
 -12   0  -5   21.28    1.13 
  12   0   5   20.83    1.11 
  13  -1  -5   18.00    1.08 
  12  -1  -5   14.95    0.94 
 -12   1   5   15.51    0.95 
  11  -1  -5   11.86    0.82 
 -11   1   5   12.44    0.82 
  10  -1  -5   25.28    1.03 
 -10   1   5   24.54    1.03 
   9  -1  -5    4.57    0.53 
  -9   1   5    5.56    0.54 
  -9   1   5    5.21    0.46 
   8  -1  -5  123.47    2.53 
   8  -1  -5  121.98    2.31 
  -8   1   5  122.66    2.51 
  -8   1   5  120.50    2.41 
   7  -1  -5    1.58    0.33 
   7  -1  -5    2.02    0.28 
  -7   1   5    1.84    0.31 
  -7   1   5    1.69    0.31 
   6  -1  -5   56.89    1.32 
   6  -1  -5   56.65    1.23 
  -6   1   5   56.36    1.30 
  -6   1   5   58.09    1.30 
   5  -1  -5   32.11    0.85 
   5  -1  -5   31.98    0.82 
  -5   1   5   31.75    0.85 
  -5   1   5   31.62    0.82 
   4  -1  -5  228.02    3.86 
   4  -1  -5  231.75    3.87 
  -4   1   5  227.84    3.87 
  -4   1   5  228.26    3.94 
   3  -1  -5    8.59    0.34 
   3  -1  -5    8.87    0.38 
  -3   1   5    7.93    0.38 
  -3   1   5    8.85    0.32 
   2  -1  -5  325.90    5.15 
   2  -1  -5  321.76    5.26 
  -2   1   5  310.74    5.29 
  -2   1   5  321.32    5.16 
   1  -1  -5    1.23    0.20 
   1  -1  -5    1.75    0.11 
  -1   1   5    1.05    0.17 
  -1   1   5    1.28    0.14 
   0  -1  -5  263.55    4.21 
   0  -1  -5  266.22    4.32 
   0   1   5  260.88    4.20 
   0   1   5  253.13    4.32 
  -1  -1  -5   23.82    0.60 
  -1  -1  -5   23.77    0.53 
   1   1   5   23.77    0.57 
   1   1   5   23.57    0.60 
  -2  -1  -5  120.23    2.11 
  -2  -1  -5  119.83    2.12 
   2   1   5  122.16    2.12 
   2   1   5  119.77    2.13 
  -3  -1  -5  120.75    2.11 
  -3  -1  -5  122.38    2.20 
   3   1   5  121.00    2.11 
   3   1   5  118.88    2.18 
  -4  -1  -5  185.97    3.30 
  -4  -1  -5  185.31    3.13 
   4   1   5  182.87    3.25 
   4   1   5  189.22    3.14 
  -5  -1  -5   84.77    1.79 
  -5  -1  -5   87.23    1.61 
   5   1   5   85.69    1.77 
   5   1   5   88.42    1.60 
  -6  -1  -5    1.09    0.19 
  -6  -1  -5    1.03    0.27 
   6   1   5    1.11    0.19 
   6   1   5    1.04    0.27 
  -7  -1  -5  160.66    3.21 
  -7  -1  -5  168.65    2.90 
   7   1   5  164.23    3.16 
   7   1   5  169.28    2.91 
  -8  -1  -5    1.10    0.37 
   8   1   5   -0.01    0.28 
  -9  -1  -5   69.25    1.80 
   9   1   5   69.82    1.79 
 -10  -1  -5    1.52    0.43 
  10   1   5    1.51    0.43 
 -11  -1  -5   52.07    1.65 
  11   1   5   52.89    1.65 
 -12  -1  -5    4.79    0.68 
  12   1   5    5.27    0.69 
 -13  -1  -5   20.67    1.16 
  13   1   5   21.12    1.16 
  12  -2  -5   11.96    0.90 
  11  -2  -5   31.84    1.27 
 -11   2   5   31.88    1.25 
  10  -2  -5    5.27    0.62 
 -10   2   5    4.80    0.50 
 -10   2   5    5.35    0.59 
   9  -2  -5   26.41    1.03 
  -9   2   5   25.65    0.99 
  -9   2   5   26.23    0.92 
   8  -2  -5   81.70    1.94 
  -8   2   5   83.50    1.85 
  -8   2   5   85.83    1.93 
  -7   2   5   41.37    1.11 
  -7   2   5   41.38    1.14 
   6  -2  -5   95.89    2.01 
   6  -2  -5  100.43    1.87 
  -6   2   5   97.07    1.99 
  -6   2   5   96.36    1.98 
   5  -2  -5   80.72    1.67 
   5  -2  -5   80.68    1.56 
  -5   2   5   78.46    1.65 
  -5   2   5   75.69    1.59 
   4  -2  -5   54.44    1.21 
   4  -2  -5   57.75    1.18 
  -4   2   5   55.87    1.24 
  -4   2   5   55.10    1.15 
   3  -2  -5    3.70    0.26 
   3  -2  -5    4.45    0.31 
  -3   2   5    3.51    0.24 
  -3   2   5    4.26    0.31 
   2  -2  -5  236.80    3.98 
   2  -2  -5  238.31    3.93 
  -2   2   5  235.11    3.85 
  -2   2   5  236.88    4.02 
   1  -2  -5   15.59    0.52 
  -1   2   5   15.35    0.48 
  -1   2   5   16.20    0.46 
  -1   2   5   15.28    0.30 
   0   2   5   32.68    0.71 
   0   2   5   31.15    0.73 
  -1  -2  -5    0.56    0.15 
  -1  -2  -5    1.44    0.13 
   1   2   5    1.32    0.17 
   1   2   5    1.24    0.17 
  -2  -2  -5  215.82    3.53 
  -2  -2  -5  213.11    3.56 
   2   2   5  212.87    3.53 
   2   2   5  209.49    3.57 
  -3  -2  -5  190.21    3.28 
  -3  -2  -5  193.42    3.25 
   3   2   5  192.14    3.20 
   3   2   5  193.40    3.32 
  -4  -2  -5  226.32    3.92 
  -4  -2  -5  225.80    3.82 
   4   2   5  231.60    3.77 
   4   2   5  227.85    3.92 
  -5  -2  -5   18.10    0.61 
  -5  -2  -5   17.25    0.54 
   5   2   5   17.83    0.47 
   5   2   5   18.30    0.65 
  -6  -2  -5   45.52    1.01 
  -6  -2  -5   44.01    1.15 
   6   2   5   43.64    1.16 
   6   2   5   45.64    0.91 
  -7  -2  -5   41.27    1.14 
  -7  -2  -5   41.21    0.98 
   7   2   5   38.91    1.14 
  -8  -2  -5   54.98    1.21 
  -8  -2  -5   52.18    1.41 
   8   2   5   52.00    1.40 
  -9  -2  -5   56.93    1.54 
   9   2   5   54.81    1.52 
 -10  -2  -5    8.58    0.71 
  10   2   5    7.97    0.68 
 -11  -2  -5   22.77    1.07 
  11   2   5   22.92    1.02 
 -12  -2  -5    7.54    0.76 
  12   2   5    7.36    0.76 
 -13  -2  -5   45.52    1.65 
  13   2   5   47.27    1.66 
  11  -3  -5   52.89    1.70 
  10  -3  -5    0.48    0.43 
 -10   3   5    0.73    0.36 
   9  -3  -5   35.58    1.24 
  -9   3   5   36.04    1.21 
  -9   3   5   34.83    1.13 
   8  -3  -5    3.73    0.47 
  -8   3   5    3.38    0.46 
  -8   3   5    3.26    0.42 
   7  -3  -5  122.47    2.54 
  -7   3   5  121.17    2.49 
  -7   3   5  121.72    2.47 
   6  -3  -5  159.03    3.06 
  -6   3   5  158.58    3.01 
  -6   3   5  162.89    3.04 
   5  -3  -5   85.98    1.62 
   5  -3  -5   79.29    1.75 
  -5   3   5   81.09    1.69 
  -5   3   5   83.19    1.76 
   4  -3  -5   47.52    1.12 
   4  -3  -5   46.02    1.02 
  -4   3   5   45.28    1.11 
  -4   3   5   45.32    1.02 
   3  -3  -5   34.21    0.82 
   3  -3  -5   30.85    0.82 
  -3   3   5   32.79    0.86 
  -3   3   5   32.55    0.74 
   2  -3  -5  144.62    2.59 
   2  -3  -5  150.08    2.61 
  -2   3   5  143.58    2.64 
  -2   3   5  148.77    2.47 
   1  -3  -5   19.84    0.59 
  -1   3   5   20.44    0.58 
  -1   3   5   20.54    0.56 
  -1   3   5   19.81    0.39 
   0  -3  -5  263.04    4.43 
   0   3   5  270.28    4.41 
   0   3   5  269.76    4.46 
  -1  -3  -5   73.67    1.22 
  -1  -3  -5   69.83    1.39 
   1   3   5   71.93    1.38 
   1   3   5   72.41    1.35 
  -2  -3  -5  189.85    3.21 
  -2  -3  -5  188.71    3.11 
   2   3   5  191.07    3.13 
   2   3   5  182.17    3.21 
  -3  -3  -5    1.20    0.17 
  -3  -3  -5    1.36    0.19 
   3   3   5    1.15    0.20 
   3   3   5    1.08    0.14 
  -4  -3  -5  393.32    6.44 
  -4  -3  -5  398.48    6.51 
   4   3   5  385.60    6.30 
   4   3   5  400.96    6.52 
  -5  -3  -5    1.21    0.23 
  -5  -3  -5    1.01    0.19 
   5   3   5    1.00    0.22 
   5   3   5    1.29    0.13 
  -6  -3  -5   42.02    0.99 
  -6  -3  -5   41.83    1.07 
   6   3   5   40.44    0.97 
  -7  -3  -5    0.67    0.26 
   7   3   5    0.71    0.28 
   7   3   5    0.51    0.21 
  -8  -3  -5   76.42    1.78 
   8   3   5   74.22    1.77 
   8   3   5   73.46    1.56 
  -9  -3  -5   63.58    1.67 
   9   3   5   65.38    1.69 
   9   3   5   64.64    1.43 
 -10  -3  -5   42.85    1.34 
  10   3   5   40.34    1.31 
 -11  -3  -5   22.42    1.00 
  11   3   5   21.69    0.99 
 -12  -3  -5   21.02    1.04 
  12   3   5   22.46    1.08 
 -13  -3  -5   34.69    1.41 
  13   3   5   33.04    1.38 
  11  -4  -5   49.49    1.69 
  10  -4  -5   20.09    1.04 
 -10   4   5   19.41    0.92 
   9  -4  -5   32.92    1.25 
  -9   4   5   35.50    1.17 
   8  -4  -5    0.75    0.38 
  -8   4   5    1.07    0.35 
   7  -4  -5   70.00    1.76 
  -7   4   5   68.32    1.67 
  -7   4   5   71.55    1.69 
   6  -4  -5   -0.02    0.27 
  -6   4   5    0.02    0.24 
  -6   4   5   -0.13    0.25 
   5  -4  -5  224.47    4.12 
  -5   4   5  225.93    4.13 
  -5   4   5  237.07    4.07 
   4  -4  -5   11.56    0.48 
   4  -4  -5   10.42    0.52 
  -4   4   5   10.85    0.54 
  -4   4   5   11.43    0.48 
   3  -4  -5   31.21    0.86 
   3  -4  -5   31.61    0.81 
  -3   4   5   32.03    0.76 
  -3   4   5   30.29    0.86 
   2  -4  -5   18.66    0.60 
   2  -4  -5   17.49    0.58 
  -2   4   5   17.74    0.47 
  -2   4   5   17.94    0.61 
   1  -4  -5  393.56    6.46 
  -1   4   5  398.41    6.56 
  -1   4   5  394.44    6.33 
  -1   4   5  397.42    6.48 
   0  -4  -5  159.81    2.80 
   0   4   5  162.11    2.82 
   0   4   5  159.45    2.82 
   0   4   5  162.33    2.60 
  -1  -4  -5  107.98    1.77 
  -1  -4  -5  105.72    1.96 
   1   4   5  107.91    1.93 
   1   4   5  105.98    1.97 
  -2  -4  -5  158.14    2.80 
  -2  -4  -5  162.73    2.66 
   2   4   5  163.15    2.72 
   2   4   5  154.95    2.80 
  -3  -4  -5  101.33    1.80 
   3   4   5  100.43    1.74 
   3   4   5   99.28    1.92 
  -4  -4  -5  248.88    4.22 
  -4  -4  -5  246.37    4.23 
   4   4   5  249.35    4.03 
   4   4   5  255.21    4.31 
  -5  -4  -5   48.31    1.09 
  -5  -4  -5   46.98    1.07 
   5   4   5   46.00    1.07 
   5   4   5   45.62    1.15 
  -6  -4  -5  115.42    2.25 
   6   4   5  116.27    2.33 
   6   4   5  116.21    2.20 
  -7  -4  -5   14.01    0.63 
   7   4   5   14.41    0.65 
   7   4   5   13.22    0.54 
  -8  -4  -5   87.46    1.93 
   8   4   5   86.79    1.97 
   8   4   5   84.66    1.79 
  -9  -4  -5    0.84    0.34 
   9   4   5    0.70    0.27 
   9   4   5    1.16    0.34 
 -10  -4  -5  112.46    2.57 
  10   4   5  120.95    2.36 
  10   4   5  116.37    2.60 
 -11  -4  -5   10.76    0.75 
  11   4   5   11.83    0.78 
 -12  -4  -5   41.51    1.45 
  12   4   5   39.39    1.42 
 -13  -4  -5    3.67    0.63 
  13   4   5    4.55    0.67 
  10  -5  -5   62.57    1.92 
 -10   5   5   62.63    1.77 
   9  -5  -5   20.20    1.03 
  -9   5   5   20.37    0.94 
   8  -5  -5   37.07    1.30 
  -8   5   5   36.05    1.21 
   7  -5  -5   23.07    0.97 
  -7   5   5   23.73    0.93 
   6  -5  -5   11.65    0.68 
  -6   5   5   10.93    0.61 
   5  -5  -5  158.87    3.12 
  -5   5   5  161.37    3.13 
  -5   5   5  162.54    3.03 
   4  -5  -5   46.15    1.24 
  -4   5   5   47.31    1.13 
  -4   5   5   47.50    1.23 
   3  -5  -5  166.56    2.89 
   3  -5  -5  158.23    3.01 
  -3   5   5  162.87    2.88 
  -3   5   5  161.78    3.04 
   2  -5  -5    9.24    0.44 
   2  -5  -5    8.39    0.45 
  -2   5   5    9.29    0.47 
  -2   5   5    9.22    0.36 
   1  -5  -5  248.89    4.27 
   1  -5  -5  253.02    4.22 
  -1   5   5  240.83    4.29 
  -1   5   5  252.70    4.09 
   0  -5  -5   10.53    0.43 
   0   5   5    9.80    0.44 
   0   5   5   10.62    0.30 
   0   5   5    9.83    0.43 
  -1  -5  -5  370.46    5.91 
  -1  -5  -5  366.51    6.04 
   1   5   5  366.56    6.06 
   1   5   5  366.74    6.07 
  -2  -5  -5   22.49    0.51 
  -2  -5  -5   21.56    0.64 
   2   5   5   22.22    0.59 
   2   5   5   23.25    0.68 
  -3  -5  -5   89.01    1.62 
  -3  -5  -5   88.38    1.75 
   3   5   5   91.09    1.61 
   3   5   5   89.23    1.78 
  -4  -5  -5   23.80    0.64 
  -4  -5  -5   23.83    0.70 
   4   5   5   23.62    0.53 
   4   5   5   23.14    0.73 
  -5  -5  -5  261.58    4.42 
   5   5   5  254.35    4.41 
   5   5   5  252.76    4.48 
   5   5   5  261.46    4.13 
  -6  -5  -5  146.03    2.74 
   6   5   5  148.97    2.84 
   6   5   5  147.06    2.74 
  -7  -5  -5   92.65    1.94 
   7   5   5   92.55    2.01 
   7   5   5   90.47    1.89 
  -8  -5  -5   61.13    1.51 
   8   5   5   61.42    1.42 
   8   5   5   60.79    1.57 
  -9  -5  -5   17.17    0.76 
   9   5   5   17.67    0.71 
   9   5   5   17.18    0.79 
 -10  -5  -5   85.82    2.06 
  10   5   5   89.66    1.91 
  10   5   5   82.00    2.07 
 -11  -5  -5   15.46    0.84 
  11   5   5   12.14    0.80 
  11   5   5   12.70    0.67 
 -12  -5  -5   82.19    2.13 
  12   5   5   75.59    2.09 
 -13  -5  -5    2.11    0.55 
  13   5   5    0.68    0.47 
  14   5   5   19.71    1.12 
 -10   6   5   37.92    1.38 
   9  -6  -5    0.20    0.41 
  -9   6   5    0.32    0.42 
   8  -6  -5   57.76    1.74 
  -8   6   5   59.40    1.66 
   7  -6  -5    1.12    0.42 
  -7   6   5    1.00    0.36 
   6  -6  -5   31.14    1.10 
  -6   6   5   30.94    1.08 
   5  -6  -5   12.02    0.65 
  -5   6   5   10.74    0.64 
   4  -6  -5  187.22    3.56 
  -4   6   5  188.33    3.57 
   3  -6  -5  118.83    2.40 
  -3   6   5  116.73    2.40 
  -3   6   5  119.54    2.24 
   2  -6  -5  104.93    1.99 
   2  -6  -5  105.29    2.12 
  -2   6   5  100.03    2.11 
  -2   6   5  104.84    1.93 
   1  -6  -5  134.08    2.55 
   1  -6  -5  135.48    2.46 
  -1   6   5  134.07    2.57 
  -1   6   5  134.72    2.34 
   0  -6  -5   47.65    1.07 
   0   6   5   46.49    0.92 
   0   6   5   45.37    1.11 
  -1  -6  -5  201.40    3.53 
   1   6   5  206.20    3.39 
   1   6   5  203.85    3.59 
  -2  -6  -5   23.96    0.72 
  -2  -6  -5   24.92    0.59 
   2   6   5   25.85    0.75 
   2   6   5   25.45    0.68 
  -3  -6  -5  289.95    4.93 
  -3  -6  -5  289.61    4.82 
   3   6   5  291.96    4.95 
   3   6   5  293.78    4.83 
  -4  -6  -5    0.23    0.18 
  -4  -6  -5    0.07    0.15 
   4   6   5    0.14    0.13 
   4   6   5    0.34    0.20 
  -5  -6  -5  162.78    2.95 
   5   6   5  167.73    2.74 
   5   6   5  166.67    3.03 
   5   6   5  162.96    3.08 
  -6  -6  -5    6.17    0.42 
   6   6   5    6.07    0.50 
   6   6   5    6.69    0.46 
  -7  -6  -5  238.94    4.25 
   7   6   5  237.26    4.34 
   7   6   5  239.26    4.23 
  -8  -6  -5   16.07    0.71 
   8   6   5   16.73    0.79 
   8   6   5   15.96    0.66 
  -9  -6  -5   53.63    1.43 
   9   6   5   52.98    1.36 
   9   6   5   55.02    1.50 
 -10  -6  -5    1.95    0.41 
  10   6   5    1.65    0.43 
  10   6   5    2.40    0.38 
 -11  -6  -5   38.41    1.29 
  11   6   5   38.48    1.16 
  11   6   5   34.69    1.26 
 -12  -6  -5   30.20    1.20 
  12   6   5   27.65    1.19 
  12   6   5   29.68    1.04 
 -13  -6  -5   29.88    1.25 
  13   6   5   27.98    1.25 
 -14  -6  -5   20.05    1.07 
  14   6   5   19.34    1.11 
  -9   7   5    6.81    0.73 
   8  -7  -5   39.99    1.47 
  -8   7   5   41.11    1.41 
   7  -7  -5   22.00    1.02 
  -7   7   5   22.88    1.02 
   6  -7  -5   32.97    1.19 
  -6   7   5   36.23    1.22 
   5  -7  -5    0.18    0.32 
  -5   7   5   -0.44    0.29 
   4  -7  -5   76.95    1.83 
  -4   7   5   76.26    1.83 
   3  -7  -5    9.57    0.60 
  -3   7   5    9.25    0.57 
   2  -7  -5  213.71    3.91 
   1  -7  -5   15.72    0.59 
   1  -7  -5   16.06    0.66 
  -1   7   5   15.49    0.65 
  -1   7   5   16.04    0.52 
   0  -7  -5   56.04    1.27 
   0   7   5   57.13    1.15 
   0   7   5   59.72    1.38 
   0   7   5   55.44    1.33 
  -1  -7  -5   12.99    0.53 
   1   7   5   11.95    0.55 
   1   7   5   12.82    0.54 
   1   7   5   13.45    0.43 
  -2  -7  -5  208.16    3.47 
  -2  -7  -5  200.97    3.60 
   2   7   5  204.72    3.59 
   2   7   5  203.69    3.64 
  -3  -7  -5  190.63    3.45 
  -3  -7  -5  194.01    3.32 
   3   7   5  194.81    3.49 
   3   7   5  193.52    3.36 
  -4  -7  -5   99.40    1.89 
  -4  -7  -5  102.04    2.04 
   4   7   5   98.54    2.04 
   4   7   5  102.93    1.87 
  -5  -7  -5   81.10    1.64 
   5   7   5   80.27    1.74 
   5   7   5   82.64    1.78 
  -6  -7  -5   47.57    1.14 
   6   7   5   46.72    1.26 
   6   7   5   46.93    1.22 
  -7  -7  -5  139.51    2.67 
   7   7   5  137.23    2.70 
   7   7   5  136.62    2.78 
  -8  -7  -5   10.16    0.58 
   8   7   5   10.31    0.57 
   8   7   5   10.37    0.62 
  -9  -7  -5   91.47    2.05 
   9   7   5   90.40    2.14 
   9   7   5   91.23    2.02 
 -10  -7  -5    0.47    0.33 
  10   7   5    0.17    0.27 
  10   7   5   -0.22    0.32 
 -11  -7  -5   25.15    1.01 
  11   7   5   25.15    1.08 
  11   7   5   26.97    0.98 
 -12  -7  -5    2.80    0.54 
  12   7   5    3.44    0.58 
  12   7   5    2.81    0.47 
 -13  -7  -5   66.90    1.94 
  13   7   5   68.67    1.79 
  13   7   5   66.95    2.00 
 -14  -7  -5   10.84    0.91 
  14   7   5   12.03    0.98 
  -8   8   5   12.36    0.84 
   7  -8  -5   31.29    1.28 
  -7   8   5   29.76    1.22 
   6  -8  -5   35.24    1.29 
  -6   8   5   38.27    1.31 
   5  -8  -5   17.58    0.90 
  -5   8   5   19.24    0.92 
   4  -8  -5   29.36    1.08 
  -4   8   5   28.99    1.07 
   3  -8  -5    6.57    0.58 
  -3   8   5    5.55    0.54 
   2  -8  -5   82.24    1.87 
  -2   8   5   78.61    1.87 
   1  -8  -5   25.79    0.89 
  -1   8   5   26.70    0.91 
   0  -8  -5   76.81    1.73 
   0  -8  -5   76.87    1.62 
   0   8   5   75.34    1.71 
  -1  -8  -5    5.75    0.41 
   1   8   5    5.19    0.44 
   1   8   5    5.40    0.33 
   1   8   5    5.63    0.47 
  -2  -8  -5   73.16    1.59 
  -2  -8  -5   75.81    1.46 
   2   8   5   72.51    1.58 
   2   8   5   73.00    1.65 
  -3  -8  -5    4.00    0.38 
  -3  -8  -5    4.15    0.31 
   3   8   5    4.31    0.35 
   3   8   5    4.29    0.41 
  -4  -8  -5  152.66    2.90 
  -4  -8  -5  152.19    2.75 
   4   8   5  150.05    2.90 
   4   8   5  156.57    2.75 
  -5  -8  -5   52.22    1.33 
  -5  -8  -5   52.44    1.21 
   5   8   5   55.23    1.35 
   5   8   5   54.46    1.36 
  -6  -8  -5   50.66    1.22 
   6   8   5   53.38    1.37 
  -7  -8  -5   17.14    0.69 
   7   8   5   15.91    0.72 
   7   8   5   16.40    0.73 
  -8  -8  -5   90.83    2.00 
   8   8   5   91.17    2.04 
   8   8   5   92.19    2.12 
  -9  -8  -5  100.68    2.23 
   9   8   5  104.66    2.26 
   9   8   5  103.25    2.35 
 -10  -8  -5   30.75    1.07 
  10   8   5   30.13    1.15 
  10   8   5   30.18    1.06 
 -11  -8  -5   36.75    1.27 
  11   8   5   39.31    1.36 
  11   8   5   39.62    1.25 
 -12  -8  -5    5.97    0.66 
  12   8   5    5.64    0.59 
  12   8   5    5.21    0.66 
 -13  -8  -5   32.13    1.29 
  13   8   5   33.10    1.34 
  13   8   5   32.43    1.20 
 -14  -8  -5    2.30    0.60 
  14   8   5    2.97    0.63 
  14   8   5    2.80    0.53 
   6  -9  -5    6.57    0.72 
  -6   9   5    7.21    0.74 
   5  -9  -5   44.04    1.46 
  -5   9   5   44.99    1.47 
   4  -9  -5   10.76    0.70 
  -4   9   5   10.46    0.72 
   3  -9  -5    7.56    0.65 
  -3   9   5    7.04    0.63 
   2  -9  -5   14.83    0.76 
  -2   9   5   15.04    0.75 
   1  -9  -5   46.03    1.31 
  -1   9   5   44.92    1.31 
   0  -9  -5   75.11    1.77 
   0   9   5   76.09    1.78 
  -1  -9  -5    6.74    0.48 
   1   9   5    6.88    0.54 
   1   9   5    7.40    0.50 
  -2  -9  -5   49.77    1.25 
   2   9   5   50.26    1.27 
   2   9   5   50.54    1.33 
  -3  -9  -5    0.10    0.24 
   3   9   5    0.56    0.26 
   3   9   5    0.54    0.27 
  -4  -9  -5  100.28    2.10 
  -4  -9  -5   98.30    1.95 
   4   9   5  102.77    2.00 
   4   9   5   97.53    2.11 
  -5  -9  -5    6.48    0.42 
  -5  -9  -5    7.41    0.53 
   5   9   5    6.97    0.52 
  -6  -9  -5  128.48    2.49 
   6   9   5  127.62    2.60 
   6   9   5  128.36    2.62 
  -7  -9  -5    0.59    0.29 
   7   9   5    0.57    0.32 
   7   9   5    0.14    0.29 
  -8  -9  -5   57.48    1.45 
   8   9   5   58.68    1.54 
   8   9   5   57.94    1.55 
  -9  -9  -5    2.53    0.41 
   9   9   5    3.09    0.46 
   9   9   5    1.75    0.38 
 -10  -9  -5   79.72    1.95 
  10   9   5   80.16    2.05 
  10   9   5   82.40    1.97 
 -11  -9  -5   23.65    0.99 
  11   9   5   21.75    1.04 
  11   9   5   22.51    0.97 
 -12  -9  -5   11.99    0.80 
  12   9   5   11.30    0.72 
  12   9   5   11.72    0.83 
 -13  -9  -5   14.60    0.88 
  13   9   5   16.15    0.97 
  13   9   5   14.88    0.88 
  14   9   5    7.61    0.81 
  14   9   5    7.03    0.73 
   5 -10  -5   28.76    1.25 
  -5  10   5   30.88    1.27 
   4 -10  -5    0.90    0.44 
  -4  10   5    0.54    0.43 
   3 -10  -5   35.83    1.28 
  -3  10   5   35.39    1.27 
   2 -10  -5    4.66    0.56 
  -2  10   5    4.75    0.56 
   1 -10  -5   48.34    1.40 
  -1  10   5   43.82    1.35 
   0 -10  -5   30.70    1.06 
   0  10   5   29.58    1.05 
  -1 -10  -5   64.00    1.62 
   1  10   5   62.88    1.59 
  -2 -10  -5   74.19    1.69 
   2  10   5   74.24    1.74 
   2  10   5   73.26    1.75 
  -3 -10  -5   13.68    0.66 
   3  10   5   14.19    0.70 
   3  10   5   14.62    0.68 
  -4 -10  -5   42.26    1.19 
   4  10   5   42.23    1.12 
   4  10   5   41.79    1.21 
  -5 -10  -5   33.17    1.06 
   5  10   5   31.35    1.03 
  -6 -10  -5   81.51    1.77 
  -6 -10  -5   80.65    1.89 
   6  10   5   82.81    1.91 
   6  10   5   83.49    1.92 
  -7 -10  -5    4.62    0.44 
   7  10   5    5.22    0.53 
   7  10   5    5.23    0.52 
  -8 -10  -5   29.94    1.01 
   8  10   5   31.33    1.10 
   8  10   5   32.22    1.11 
  -9 -10  -5   -0.43    0.29 
   9  10   5   -0.40    0.30 
   9  10   5   -0.08    0.32 
 -10 -10  -5   46.21    1.38 
  10  10   5   46.69    1.48 
  10  10   5   45.06    1.41 
 -11 -10  -5    0.01    0.36 
  11  10   5   -0.76    0.33 
  11  10   5    0.00    0.38 
 -12 -10  -5   47.55    1.50 
  12  10   5   43.90    1.47 
  12  10   5   47.10    1.58 
 -13 -10  -5    4.39    0.65 
  13  10   5    4.45    0.67 
  13  10   5    6.00    0.69 
  14  10   5   14.21    1.03 
   4 -11  -5   14.47    0.93 
  -4  11   5   15.43    0.96 
   3 -11  -5   55.57    1.69 
  -3  11   5   51.39    1.67 
   2 -11  -5    1.61    0.43 
  -2  11   5    1.38    0.46 
   1 -11  -5   42.30    1.37 
  -1  11   5   42.35    1.39 
   0 -11  -5    1.78    0.39 
   0  11   5    1.73    0.40 
  -1 -11  -5   80.03    1.93 
   1  11   5   77.71    1.93 
  -2 -11  -5    1.02    0.36 
   2  11   5    0.94    0.36 
  -3 -11  -5   46.44    1.27 
   3  11   5   43.14    1.30 
   3  11   5   45.92    1.28 
  -4 -11  -5   30.51    1.04 
   4  11   5   33.31    1.01 
   4  11   5   31.80    1.08 
  -5 -11  -5   30.86    1.05 
   5  11   5   29.18    1.02 
  -6 -11  -5   18.14    0.84 
   6  11   5   19.16    0.83 
  -7 -11  -5   63.61    1.68 
   7  11   5   63.41    1.69 
   7  11   5   64.68    1.68 
  -8 -11  -5   59.50    1.52 
   8  11   5   56.28    1.61 
   8  11   5   57.61    1.60 
  -9 -11  -5    2.05    0.41 
   9  11   5    2.78    0.49 
   9  11   5    2.83    0.48 
 -10 -11  -5   26.83    1.03 
  10  11   5   27.48    1.12 
  10  11   5   27.43    1.11 
 -11 -11  -5   19.43    0.94 
  11  11   5   21.38    1.03 
  11  11   5   20.75    1.01 
 -12 -11  -5   53.94    1.64 
  12  11   5   52.73    1.71 
  12  11   5   53.29    1.65 
 -13 -11  -5    2.27    0.51 
  13  11   5    2.29    0.58 
  13  11   5    1.43    0.53 
   3 -12  -5   19.57    1.05 
   2 -12  -5   32.70    1.30 
  -2  12   5   33.62    1.34 
   1 -12  -5   27.86    1.15 
  -1  12   5   27.12    1.16 
   0 -12  -5    3.01    0.52 
   0  12   5    2.83    0.53 
  -1 -12  -5   39.13    1.31 
   1  12   5   40.62    1.34 
  -2 -12  -5   24.86    1.00 
   2  12   5   25.57    1.02 
   3  12   5   80.81    1.98 
   3  12   5   80.30    1.94 
  -4 -12  -5    0.43    0.32 
   4  12   5   -0.20    0.32 
  -5 -12  -5   45.99    1.38 
   5  12   5   49.42    1.42 
  -6 -12  -5    9.17    0.67 
   6  12   5    8.87    0.64 
  -7 -12  -5   67.49    1.81 
   7  12   5   69.47    1.79 
  -8 -12  -5    1.04    0.38 
   8  12   5    1.60    0.42 
   8  12   5    1.98    0.43 
   9  12   5   43.33    1.42 
   9  12   5   42.80    1.40 
 -10 -12  -5   22.40    0.95 
  10  12   5   19.71    0.97 
  10  12   5   20.43    1.02 
 -11 -12  -5   25.13    1.07 
  11  12   5   25.56    1.15 
  11  12   5   25.25    1.12 
 -12 -12  -5   12.11    0.84 
  12  12   5   10.85    0.88 
 -13 -12  -5   25.68    1.17 
   1 -13  -5    1.76    0.54 
  -1  13   5    2.06    0.52 
   0 -13  -5   28.68    1.20 
   0  13   5   27.39    1.21 
  -1 -13  -5   21.49    1.01 
   1  13   5   20.06    1.01 
  -2 -13  -5   29.83    1.16 
   2  13   5   31.66    1.20 
  -3 -13  -5   27.99    1.10 
   3  13   5   28.72    1.11 
   4  13   5   34.91    1.24 
  -5 -13  -5   52.12    1.53 
   5  13   5   54.11    1.55 
  -6 -13  -5    3.36    0.52 
   6  13   5    2.94    0.49 
  -7 -13  -5   66.55    1.83 
   7  13   5   69.04    1.82 
  -8 -13  -5   11.47    0.81 
   8  13   5   11.54    0.79 
  -9 -13  -5   48.22    1.57 
   9  13   5   51.24    1.56 
  10  13   5    0.66    0.48 
  11  13   5   30.42    1.29 
  -1 -14  -5    0.23    0.45 
   1  14   5    1.08    0.51 
  -2 -14  -5   38.74    1.38 
   2  14   5   40.09    1.43 
  -3 -14  -5    0.55    0.44 
  -4 -14  -5   59.58    1.71 
   5  14   5    3.38    0.55 
  -6 -14  -5   39.54    1.37 
   6  14   5   40.60    1.37 
  -7 -14  -5   38.61    1.37 
  -8 -14  -5   11.45    0.83 
  -9 -14  -5   13.89    0.92 
  -7 -15  -5   -0.77    0.38 
  -8 -15  -5   28.16    1.21 
   9  13  -6   16.19    0.98 
   8  13  -6   10.80    0.81 
  -7 -13   6   19.69    1.07 
   6  13  -6   11.82    0.89 
   5  13  -6    7.75    0.81 
   4  13  -6   48.65    1.67 
  -4 -13   6   51.01    1.68 
   3  13  -6    1.82    0.57 
  -3 -13   6    2.02    0.56 
  10  12  -6    0.59    0.47 
 -10 -12   6    0.53    0.43 
   9  12  -6   41.16    1.46 
  -9 -12   6   42.25    1.52 
   8  12  -6    1.35    0.48 
  -8 -12   6    1.37    0.49 
   7  12  -6   39.37    1.34 
  -7 -12   6   39.11    1.43 
   6  12  -6    4.08    0.60 
   5  12  -6   19.10    1.02 
  -5 -12   6   21.84    1.05 
   4  12  -6   29.34    1.21 
  -4 -12   6   32.72    1.28 
   3  12  -6   16.13    0.96 
  -3 -12   6   17.38    0.96 
   2  12  -6   18.43    1.04 
  -2 -12   6   17.72    1.00 
   1  12  -6    3.65    0.63 
  -1 -12   6    3.40    0.59 
   0  12  -6   24.35    1.23 
  11  11  -6   17.58    1.00 
 -11 -11   6   15.32    0.98 
  10  11  -6    2.65    0.52 
 -10 -11   6    2.72    0.56 
   9  11  -6   27.64    1.16 
  -9 -11   6   27.97    1.20 
   8  11  -6    1.46    0.46 
  -8 -11   6    1.47    0.43 
   7  11  -6   79.41    2.00 
  -7 -11   6   79.99    2.11 
   6  11  -6    0.61    0.38 
   6  11  -6    1.09    0.40 
   5  11  -6   41.39    1.42 
   5  11  -6   44.57    1.32 
  -5 -11   6   44.46    1.42 
   4  11  -6   14.52    0.84 
  -4 -11   6   18.13    0.91 
   3  11  -6   45.47    1.50 
  -3 -11   6   45.01    1.47 
   2  11  -6   19.65    1.01 
  -2 -11   6   21.25    0.98 
   1  11  -6   34.58    1.33 
  -1 -11   6   31.93    1.28 
   0  11  -6   12.28    0.83 
   0 -11   6   14.35    0.90 
  -1  11  -6   20.84    1.11 
   1 -11   6   20.69    1.08 
  12  10  -6   42.83    1.53 
 -12 -10   6   46.36    1.62 
  11  10  -6   13.88    0.89 
 -11 -10   6   13.81    0.87 
  10  10  -6   39.83    1.35 
 -10 -10   6   37.36    1.38 
   9  10  -6   34.93    1.25 
  -9 -10   6   34.46    1.29 
   8  10  -6   31.10    1.15 
  -8 -10   6   31.59    1.20 
   7  10  -6   66.11    1.74 
  -7 -10   6   69.13    1.86 
   6  10  -6   10.79    0.67 
   6  10  -6   10.83    0.70 
  -6 -10   6   10.04    0.66 
   5  10  -6   61.65    1.55 
   5  10  -6   55.82    1.63 
  -5 -10   6   58.46    1.60 
   4  10  -6    3.63    0.44 
   4  10  -6    2.54    0.48 
  -4 -10   6    3.27    0.49 
   3  10  -6   65.22    1.76 
  -3 -10   6   62.61    1.72 
   2  10  -6    1.28    0.39 
  -2 -10   6    0.94    0.40 
   1  10  -6   79.47    2.08 
  -1 -10   6   80.07    2.06 
   0  10  -6    3.53    0.54 
   0 -10   6    3.05    0.54 
  -1  10  -6   30.54    1.25 
   1 -10   6   29.02    1.20 
  -2  10  -6    3.62    0.60 
   2 -10   6    2.75    0.55 
  -3  10  -6   40.29    1.51 
   3 -10   6   41.64    1.50 
  -4  10  -6   19.73    1.15 
  12   9  -6   51.24    1.63 
 -12  -9   6   49.83    1.67 
  11   9  -6    1.46    0.47 
 -11  -9   6    1.05    0.44 
  10   9  -6  125.36    2.80 
 -10  -9   6  124.71    2.87 
   9   9  -6    1.25    0.37 
  -9  -9   6    1.00    0.40 
   8   9  -6   31.14    1.11 
  -8  -9   6   30.97    1.15 
   7   9  -6   13.27    0.73 
  -7  -9   6   12.11    0.73 
   6   9  -6   98.78    2.32 
   6   9  -6  101.16    2.22 
  -6  -9   6  102.05    2.25 
   5   9  -6   16.05    0.72 
   5   9  -6   13.75    0.74 
  -5  -9   6   15.04    0.76 
   4   9  -6   91.38    1.95 
   4   9  -6   88.89    2.12 
  -4  -9   6   85.72    2.04 
   3   9  -6   24.06    0.96 
   3   9  -6   24.72    0.82 
  -3  -9   6   24.19    0.96 
   2   9  -6   27.05    1.05 
  -2  -9   6   26.82    1.02 
   1   9  -6   99.12    2.34 
  -1  -9   6  100.32    2.33 
   0   9  -6   26.93    1.08 
   0  -9   6   28.56    1.08 
  -1   9  -6   74.65    2.00 
   1  -9   6   76.32    1.98 
  -2   9  -6    0.07    0.38 
   2  -9   6   -0.06    0.37 
  -3   9  -6   60.82    1.84 
   3  -9   6   60.28    1.76 
  -4   9  -6    0.98    0.49 
   4  -9   6    1.62    0.49 
  -5   9  -6   59.88    1.93 
   5  -9   6   57.06    1.80 
  13   8  -6   22.78    1.09 
 -13  -8   6   21.49    1.08 
  12   8  -6   18.25    0.96 
 -12  -8   6   20.08    1.03 
  11   8  -6   30.08    1.16 
 -11  -8   6   29.12    1.16 
  10   8  -6   82.03    2.06 
 -10  -8   6   81.23    2.09 
   9   8  -6   36.88    1.20 
  -9  -8   6   36.77    1.26 
   8   8  -6   56.09    1.53 
  -8  -8   6   57.27    1.57 
   7   8  -6    1.90    0.38 
  -7  -8   6    1.89    0.37 
  -7  -8   6    2.00    0.38 
   6   8  -6   62.31    1.56 
  -6  -8   6   62.40    1.56 
  -6  -8   6   63.38    1.64 
   5   8  -6    1.08    0.31 
   5   8  -6    0.42    0.32 
  -5  -8   6    0.87    0.34 
   4   8  -6  192.02    3.79 
   4   8  -6  201.50    3.62 
  -4  -8   6  197.82    3.75 
   3   8  -6    0.52    0.26 
   3   8  -6    0.79    0.33 
  -3  -8   6    0.44    0.29 
   2   8  -6  122.02    2.29 
   2   8  -6  116.99    2.54 
  -2  -8   6  113.00    2.49 
   1   8  -6   15.64    0.76 
  -1  -8   6   15.07    0.74 
   0   8  -6  111.35    2.51 
   0  -8   6  112.87    2.48 
  -1   8  -6   38.21    1.28 
   1  -8   6   37.29    1.23 
  -2   8  -6   49.50    1.52 
   2  -8   6   51.46    1.52 
  -3   8  -6   24.76    1.09 
   3  -8   6   23.16    1.01 
  -4   8  -6   11.43    0.82 
   4  -8   6   12.12    0.78 
  -5   8  -6   63.98    1.95 
   5  -8   6   62.50    1.82 
  -6   8  -6    5.32    0.72 
   6  -8   6    5.98    0.65 
   6  -8   6    6.82    0.71 
   7  -8   6   30.57    1.27 
  14   7  -6    2.52    0.58 
  13   7  -6   54.76    1.67 
 -13  -7   6   52.44    1.74 
  12   7  -6    2.53    0.49 
 -12  -7   6    1.51    0.45 
  11   7  -6   39.99    1.32 
 -11  -7   6   37.94    1.34 
  10   7  -6   22.04    0.93 
 -10  -7   6   24.31    1.01 
   9   7  -6  116.93    2.53 
  -9  -7   6  116.61    2.59 
   8   7  -6   15.28    0.72 
  -8  -7   6   15.17    0.75 
   7   7  -6   38.10    1.15 
  -7  -7   6   39.51    1.20 
  -7  -7   6   39.65    1.13 
   6   7  -6   80.83    1.81 
  -6  -7   6   80.16    1.82 
  -6  -7   6   79.85    1.88 
   5   7  -6   50.73    1.37 
   5   7  -6   50.34    1.28 
  -5  -7   6   49.35    1.31 
   4   7  -6  176.99    3.25 
   4   7  -6  173.30    3.40 
  -4  -7   6  180.16    3.37 
   3   7  -6   43.55    1.10 
   3   7  -6   41.84    1.20 
  -3  -7   6   43.37    1.20 
   2   7  -6   97.84    2.17 
   2   7  -6   99.92    1.95 
  -2  -7   6   98.37    2.14 
   1   7  -6    3.72    0.33 
   1   7  -6    3.57    0.43 
  -1  -7   6    3.14    0.40 
   0   7  -6   86.17    2.02 
   0  -7   6   90.12    2.03 
  -1   7  -6    0.26    0.32 
   1  -7   6    0.34    0.29 
  -2   7  -6   78.35    1.97 
   2  -7   6   77.35    1.70 
   2  -7   6   75.00    1.87 
  -3   7  -6   19.12    0.93 
   3  -7   6   17.94    0.85 
   3  -7   6   18.50    0.79 
  -4   7  -6   27.21    1.15 
   4  -7   6   29.45    1.08 
   4  -7   6   28.97    1.01 
  -5   7  -6   10.49    0.80 
   5  -7   6   10.01    0.72 
   5  -7   6   10.93    0.71 
  -6   7  -6   52.88    1.72 
   6  -7   6   52.44    1.56 
   6  -7   6   54.08    1.60 
  -7   7  -6   26.20    1.26 
   7  -7   6   28.15    1.17 
   7  -7   6   28.21    1.21 
   8  -7   6   11.08    0.83 
   8  -7   6    8.60    0.79 
  14   6  -6    5.31    0.65 
  13   6  -6   32.22    1.22 
 -13  -6   6   33.64    1.35 
  12   6  -6    7.06    0.64 
 -12  -6   6    6.95    0.68 
  11   6  -6   49.46    1.46 
 -11  -6   6   47.28    1.50 
  10   6  -6    4.57    0.50 
 -10  -6   6    4.94    0.55 
   9   6  -6   99.22    2.22 
  -9  -6   6   99.79    2.27 
   8   6  -6    1.83    0.36 
  -8  -6   6    2.15    0.37 
   7   6  -6  218.34    4.08 
  -7  -6   6  220.26    4.15 
  -7  -6   6  229.70    4.04 
   6   6  -6   18.87    0.73 
  -6  -6   6   19.46    0.78 
  -6  -6   6   20.23    0.76 
   5   6  -6   82.50    1.85 
   5   6  -6   84.78    1.80 
  -5  -6   6   80.28    1.81 
   4   6  -6   20.47    0.77 
   4   6  -6   22.30    0.75 
  -4  -6   6   21.43    0.77 
   3   6  -6  105.12    2.07 
   3   6  -6  108.48    2.21 
  -3  -6   6  102.43    2.16 
   2   6  -6   49.04    1.28 
   2   6  -6   52.17    1.16 
  -2  -6   6   49.60    1.27 
   1   6  -6   44.34    1.03 
   1   6  -6   44.43    1.23 
  -1  -6   6   45.26    1.21 
   0   6  -6   26.49    0.92 
   0   6  -6   30.17    0.73 
   0  -6   6   27.59    0.92 
   0  -6   6   28.94    0.75 
  -1   6  -6   19.23    0.80 
   1  -6   6   15.19    0.71 
   1  -6   6   19.67    0.65 
  -2   6  -6   36.88    1.20 
   2  -6   6   38.26    1.02 
   2  -6   6   37.48    1.16 
  -3   6  -6    5.16    0.56 
   3  -6   6    5.94    0.53 
   3  -6   6    5.93    0.50 
  -4   6  -6   96.56    2.34 
   4  -6   6   95.58    2.20 
   4  -6   6   97.63    2.10 
  -5   6  -6    0.83    0.41 
   5  -6   6    0.88    0.37 
   5  -6   6    0.77    0.34 
  -6   6  -6   55.43    1.72 
   6  -6   6   56.12    1.60 
   6  -6   6   57.70    1.60 
  -7   6  -6    1.18    0.46 
   7  -6   6    0.63    0.39 
   7  -6   6    1.52    0.46 
  -8   6  -6   42.74    1.62 
   8  -6   6   45.91    1.49 
   8  -6   6   43.97    1.51 
  14   5  -6   10.52    0.78 
 -14  -5   6    9.90    0.88 
  13   5  -6   21.97    0.98 
 -13  -5   6   22.32    1.09 
  12   5  -6   21.55    0.94 
 -12  -5   6   21.52    1.03 
  11   5  -6   39.71    1.25 
 -11  -5   6   39.02    1.32 
  10   5  -6    5.58    0.54 
 -10  -5   6    4.90    0.54 
   9   5  -6   66.68    1.66 
  -9  -5   6   70.28    1.73 
   8   5  -6   18.36    0.75 
  -8  -5   6   18.14    0.76 
   7   5  -6   50.88    1.32 
  -7  -5   6   50.81    1.34 
  -7  -5   6   51.22    1.25 
   6   5  -6   11.47    0.56 
  -6  -5   6   12.46    0.60 
  -6  -5   6   12.61    0.59 
   5   5  -6   96.97    2.00 
  -5  -5   6  100.07    2.05 
  -5  -5   6   98.65    2.06 
   4   5  -6    1.02    0.23 
   4   5  -6    0.95    0.25 
  -4  -5   6    1.22    0.28 
   3   5  -6   65.29    1.40 
   3   5  -6   66.93    1.49 
  -3  -5   6   63.20    1.48 
   2   5  -6    7.60    0.42 
   2   5  -6    7.87    0.48 
  -2  -5   6    8.19    0.46 
   1   5  -6  105.73    1.97 
   1   5  -6  103.18    2.15 
  -1  -5   6  107.41    2.16 
  -1  -5   6  106.28    1.84 
   0   5  -6   17.21    0.53 
   0   5  -6   15.50    0.67 
   0  -5   6   17.08    0.52 
   0  -5   6   16.04    0.67 
  -1   5  -6   72.79    1.73 
  -1   5  -6   77.49    1.41 
   1  -5   6   78.11    1.52 
   1  -5   6   72.74    1.69 
  -2   5  -6   26.71    0.94 
   2  -5   6   27.83    0.90 
   2  -5   6   27.14    0.82 
  -3   5  -6   57.66    1.54 
   3  -5   6   57.23    1.46 
   3  -5   6   57.92    1.36 
  -4   5  -6   77.95    1.95 
   4  -5   6   77.71    1.75 
   4  -5   6   75.35    1.80 
  -5   5  -6   17.40    0.86 
   5  -5   6   16.87    0.77 
   5  -5   6   18.10    0.80 
  -6   5  -6   41.89    1.43 
   6  -5   6   43.43    1.30 
   6  -5   6   43.02    1.31 
  -7   5  -6    1.74    0.49 
   7  -5   6    2.22    0.48 
   7  -5   6    1.58    0.41 
  -8   5  -6   43.93    1.57 
   8  -5   6   43.55    1.47 
   8  -5   6   43.78    1.40 
  -9   5  -6    1.99    0.56 
   9  -5   6    0.00    0.49 
 -14  -4   6   28.11    1.29 
  13   4  -6   13.44    0.78 
 -13  -4   6   13.34    0.90 
  12   4  -6   31.81    1.13 
 -12  -4   6   32.54    1.24 
  11   4  -6    4.91    0.53 
 -11  -4   6    4.10    0.54 
  10   4  -6   49.62    1.37 
 -10  -4   6   50.75    1.45 
   9   4  -6   40.13    1.17 
  -9  -4   6   40.49    1.22 
   8   4  -6   32.22    1.00 
  -8  -4   6   31.40    1.01 
  -8  -4   6   32.06    0.90 
   7   4  -6   74.54    1.69 
  -7  -4   6   75.67    1.72 
  -7  -4   6   77.55    1.63 
   6   4  -6   77.84    1.70 
  -6  -4   6   81.22    1.73 
  -6  -4   6   78.79    1.68 
   5   4  -6   96.49    1.61 
   5   4  -6   96.54    1.95 
  -5  -4   6   96.84    1.97 
  -5  -4   6   95.56    1.97 
   4   4  -6    4.74    0.36 
   4   4  -6    4.64    0.36 
  -4  -4   6    4.82    0.40 
   3   4  -6   70.41    1.51 
   3   4  -6   69.80    1.47 
  -3  -4   6   70.12    1.53 
   2   4  -6    0.73    0.21 
   2   4  -6    0.50    0.18 
  -2  -4   6    0.91    0.22 
   1   4  -6  209.72    3.84 
   1   4  -6  222.03    3.68 
  -1  -4   6  218.52    3.49 
  -1  -4   6  214.40    3.83 
   0   4  -6   -0.14    0.13 
   0   4  -6    0.06    0.18 
   0  -4   6    0.51    0.21 
   0  -4   6    0.03    0.14 
  -1   4  -6  186.85    3.15 
  -1   4  -6  186.59    3.49 
   1  -4   6  190.65    3.45 
   1  -4   6  188.56    3.21 
  -2   4  -6    3.93    0.40 
  -2   4  -6    3.41    0.24 
   2  -4   6    3.66    0.33 
   2  -4   6    3.31    0.35 
  -3   4  -6   49.85    1.36 
   3  -4   6   48.81    1.19 
   3  -4   6   49.55    1.27 
  -4   4  -6   11.04    0.64 
   4  -4   6   11.67    0.60 
   4  -4   6   11.22    0.59 
  -5   4  -6   89.52    2.15 
   5  -4   6   89.79    2.01 
   5  -4   6   93.61    2.01 
  -6   4  -6   27.66    1.08 
   6  -4   6   25.77    0.97 
   6  -4   6   25.52    0.93 
  -7   4  -6    7.21    0.70 
   7  -4   6    7.22    0.65 
   7  -4   6    7.69    0.61 
  -8   4  -6   37.30    1.36 
   8  -4   6   35.36    1.17 
   8  -4   6   34.76    1.27 
  -9   4  -6   18.55    1.02 
   9  -4   6   19.17    1.00 
 -10   4  -6   30.21    1.37 
  10  -4   6   30.11    1.30 
 -14  -3   6   20.24    1.14 
 -13  -3   6    0.68    0.47 
  12   3  -6   46.49    1.37 
 -12  -3   6   48.28    1.52 
  11   3  -6    0.14    0.31 
 -11  -3   6   -0.11    0.30 
  10   3  -6  110.72    2.36 
 -10  -3   6  112.59    2.48 
   9   3  -6   -0.01    0.27 
   9   3  -6    0.70    0.29 
  -9  -3   6    0.49    0.30 
   8   3  -6  117.09    2.28 
   8   3  -6  117.82    2.40 
  -8  -3   6  116.68    2.44 
  -8  -3   6  124.22    2.32 
   7   3  -6   68.93    1.52 
   7   3  -6   65.66    1.38 
  -7  -3   6   62.87    1.51 
  -7  -3   6   67.47    1.45 
   6   3  -6  158.79    2.97 
   6   3  -6  158.87    2.76 
  -6  -3   6  163.01    2.95 
  -6  -3   6  162.74    3.00 
   5   3  -6    8.05    0.31 
   5   3  -6    8.69    0.45 
  -5  -3   6    8.61    0.45 
  -5  -3   6    8.78    0.48 
   4   3  -6  209.51    3.67 
   4   3  -6  211.34    3.33 
  -4  -3   6  210.72    3.70 
  -4  -3   6  208.02    3.72 
   3   3  -6  149.25    2.68 
   3   3  -6  147.23    2.71 
  -3  -3   6  149.76    2.77 
   2   3  -6   22.13    0.64 
   2   3  -6   22.25    0.66 
  -2  -3   6   21.55    0.68 
   1   3  -6  224.70    4.05 
   1   3  -6  239.62    3.94 
  -1  -3   6  239.24    3.72 
  -1  -3   6  233.44    4.09 
   0   3  -6  106.96    1.93 
   0   3  -6  107.22    2.08 
   0  -3   6  105.59    2.08 
   0  -3   6  109.80    1.85 
  -1   3  -6  183.17    3.07 
  -1   3  -6  182.47    3.33 
   1  -3   6  180.07    3.28 
   1  -3   6  184.76    3.09 
  -2   3  -6    9.32    0.35 
  -2   3  -6   11.58    0.54 
   2  -3   6    9.35    0.46 
   2  -3   6   10.98    0.46 
  -3   3  -6  105.95    2.24 
  -3   3  -6  106.32    1.81 
   3  -3   6  107.34    2.06 
   3  -3   6  105.84    2.13 
  -4   3  -6   18.70    0.78 
   4  -3   6   17.73    0.69 
   4  -3   6   18.26    0.69 
  -5   3  -6   79.94    1.94 
   5  -3   6   84.21    1.85 
   5  -3   6   84.59    1.82 
  -6   3  -6    0.28    0.29 
   6  -3   6    0.25    0.26 
   6  -3   6    0.45    0.33 
  -7   3  -6   53.20    1.58 
   7  -3   6   54.31    1.40 
   7  -3   6   52.87    1.50 
  -8   3  -6   33.74    1.27 
   8  -3   6   33.24    1.07 
   8  -3   6   33.35    1.20 
  -9   3  -6   38.25    1.40 
   9  -3   6   38.72    1.37 
 -10   3  -6    6.40    0.75 
  10  -3   6    5.31    0.69 
 -14  -2   6    1.19    0.57 
 -13  -2   6   34.53    1.37 
 -12  -2   6   40.73    1.41 
  11   2  -6   24.36    1.01 
  11   2  -6   26.68    0.93 
 -11  -2   6   23.97    1.04 
  10   2  -6   84.07    1.92 
  10   2  -6   82.23    1.85 
 -10  -2   6   77.86    1.95 
   9   2  -6   60.56    1.48 
   9   2  -6   60.37    1.47 
  -9  -2   6   59.97    1.55 
   8   2  -6   83.38    1.79 
   8   2  -6   84.43    1.82 
  -8  -2   6   84.78    1.88 
  -8  -2   6   86.28    1.77 
   7   2  -6    0.56    0.23 
   7   2  -6    0.29    0.24 
  -7  -2   6    0.39    0.24 
  -7  -2   6    0.16    0.22 
   6   2  -6  253.17    4.27 
   6   2  -6  258.26    4.44 
  -6  -2   6  256.57    4.42 
  -6  -2   6  254.80    4.46 
   5   2  -6    7.32    0.41 
   5   2  -6    8.25    0.34 
  -5  -2   6    7.16    0.38 
  -5  -2   6    7.74    0.43 
   4   2  -6  200.88    3.29 
   4   2  -6  202.71    3.55 
  -4  -2   6  203.60    3.54 
  -4  -2   6  207.00    3.59 
   3   2  -6    1.56    0.12 
   3   2  -6    1.51    0.21 
   3   2  -6    2.09    0.25 
  -3  -2   6    2.17    0.27 
   2   2  -6  203.80    3.51 
   2   2  -6  200.67    3.49 
  -2  -2   6  207.20    3.61 
   1   2  -6  326.70    5.41 
   1   2  -6  320.42    5.32 
  -1  -2   6  325.49    5.46 
   0   2  -6  196.22    3.34 
   0   2  -6  194.13    3.44 
   0  -2   6  195.62    3.46 
   0  -2   6  203.10    3.21 
  -1   2  -6  215.54    3.73 
  -1   2  -6  208.56    3.53 
   1  -2   6  209.21    3.70 
   1  -2   6  215.16    3.52 
  -2   2  -6  160.77    2.99 
  -2   2  -6  160.83    2.73 
   2  -2   6  163.12    2.80 
   2  -2   6  159.97    2.91 
  -3   2  -6   98.34    2.04 
  -3   2  -6   98.33    1.75 
   3  -2   6   99.09    1.90 
   3  -2   6   98.82    1.95 
  -4   2  -6   31.84    0.70 
  -4   2  -6   33.61    1.01 
   4  -2   6   32.89    0.93 
   4  -2   6   31.91    0.89 
  -5   2  -6  133.81    2.71 
   5  -2   6  130.68    2.53 
   5  -2   6  131.84    2.58 
  -6   2  -6   36.11    1.17 
   6  -2   6   40.76    1.07 
   6  -2   6   37.11    1.13 
  -7   2  -6   84.29    2.08 
   7  -2   6   89.59    1.89 
   7  -2   6   85.62    2.01 
  -8   2  -6    2.20    0.46 
   8  -2   6    2.73    0.48 
   8  -2   6    2.44    0.37 
  -9   2  -6   68.36    1.92 
   9  -2   6   67.49    1.86 
 -10   2  -6    0.51    0.44 
  10  -2   6    0.27    0.45 
 -11   2  -6   28.87    1.31 
  11  -2   6   28.61    1.29 
 -14  -1   6    0.71    0.55 
 -13  -1   6   62.16    1.90 
  12   1  -6    0.19    0.40 
 -12  -1   6    0.33    0.44 
  11   1  -6   68.57    1.80 
 -11  -1   6   68.07    1.84 
  10   1  -6   45.56    1.33 
  10   1  -6   44.56    1.21 
 -10  -1   6   44.72    1.36 
   9   1  -6   88.74    1.88 
   9   1  -6   85.19    1.95 
  -9  -1   6   84.61    1.98 
  -9  -1   6   88.36    1.86 
   8   1  -6   20.57    0.75 
   8   1  -6   21.84    0.80 
  -8  -1   6   22.02    0.74 
  -8  -1   6   21.09    0.80 
   7   1  -6   59.28    1.36 
   7   1  -6   59.43    1.35 
  -7  -1   6   59.71    1.35 
  -7  -1   6   59.57    1.41 
   6   1  -6   90.24    1.84 
   6   1  -6   90.70    1.78 
  -6  -1   6   92.34    1.83 
  -6  -1   6   92.17    1.85 
   5   1  -6    7.28    0.40 
   5   1  -6    8.33    0.37 
  -5  -1   6    6.91    0.38 
  -5  -1   6    8.43    0.43 
   4   1  -6  148.96    2.69 
   4   1  -6  150.00    2.52 
  -4  -1   6  151.14    2.71 
  -4  -1   6  146.43    2.65 
   3   1  -6   76.60    1.33 
   3   1  -6   76.84    1.53 
  -3  -1   6   78.92    1.48 
  -3  -1   6   76.00    1.56 
   2   1  -6  389.65    6.56 
   2   1  -6  408.24    6.58 
   2   1  -6  405.56    6.31 
  -2  -1   6  407.48    6.68 
   1   1  -6    3.05    0.27 
   1   1  -6    3.27    0.25 
  -1  -1   6    3.70    0.31 
  -1  -1   6    3.23    0.16 
   0   1  -6  371.85    6.21 
   0   1  -6  375.29    6.15 
   0  -1   6  378.76    6.27 
   0  -1   6  384.52    5.99 
  -1   1  -6   -0.09    0.15 
  -1   1  -6   -0.09    0.14 
   1  -1   6   -0.06    0.13 
   1  -1   6    0.03    0.15 
  -2   1  -6  317.35    5.12 
  -2   1  -6  311.05    5.30 
   2  -1   6  314.58    5.24 
   2  -1   6  308.39    5.12 
  -3   1  -6    3.79    0.35 
  -3   1  -6    4.62    0.29 
   3  -1   6    4.55    0.34 
   3  -1   6    4.42    0.32 
  -4   1  -6  307.46    4.94 
  -4   1  -6  295.86    5.27 
   4  -1   6  301.16    5.12 
   4  -1   6  306.05    5.13 
  -5   1  -6   90.45    1.94 
  -5   1  -6   89.03    1.60 
   5  -1   6   83.33    1.83 
   5  -1   6   85.46    1.75 
  -6   1  -6   70.20    1.72 
   6  -1   6   74.67    1.56 
   6  -1   6   70.61    1.66 
  -7   1  -6   27.58    1.01 
   7  -1   6   28.61    1.02 
   7  -1   6   31.18    0.90 
  -8   1  -6   77.13    1.96 
   8  -1   6   77.35    1.91 
  -9   1  -6   60.12    1.75 
   9  -1   6   61.03    1.70 
 -10   1  -6   11.97    0.84 
  10  -1   6   11.62    0.82 
 -11   1  -6   45.30    1.61 
  11  -1   6   43.56    1.53 
  13   0  -6   26.93    1.24 
  12   0  -6   18.89    1.00 
 -12   0   6   18.66    1.00 
  11   0  -6   42.78    1.39 
 -11   0   6   40.37    1.36 
  10   0  -6    0.01    0.33 
 -10   0   6   -0.26    0.32 
   9   0  -6   49.74    1.25 
   9   0  -6   48.71    1.37 
  -9   0   6   50.73    1.38 
  -9   0   6   50.25    1.28 
   8   0  -6    0.97    0.33 
   8   0  -6    1.08    0.28 
  -8   0   6    1.67    0.31 
  -8   0   6    1.20    0.32 
   7   0  -6  142.49    2.67 
   7   0  -6  138.55    2.62 
  -7   0   6  137.60    2.68 
  -7   0   6  139.28    2.65 
   6   0  -6    5.13    0.39 
   6   0  -6    5.03    0.39 
  -6   0   6    5.58    0.40 
  -6   0   6    4.63    0.37 
   5   0  -6  199.32    3.38 
   5   0  -6  197.35    3.44 
  -5   0   6  195.38    3.43 
  -5   0   6  192.43    3.46 
   4   0  -6  222.88    3.79 
   4   0  -6  224.42    3.68 
  -4   0   6  217.86    3.82 
  -4   0   6  215.76    3.73 
   3   0  -6  152.01    2.77 
   3   0  -6  159.80    2.63 
  -3   0   6  153.77    2.80 
  -3   0   6  161.67    2.70 
   2   0  -6   77.48    1.41 
   2   0  -6   78.97    1.37 
   1   0  -6  456.08    7.52 
   1   0  -6  468.86    7.48 
  -1   0   6  455.36    7.61 
  -1   0   6  477.51    7.32 
   0   0  -6  243.64    3.98 
   0   0  -6  236.95    4.03 
   0   0   6  246.63    4.10 
   0   0   6  233.79    3.87 
  -1   0  -6   39.85    0.88 
  -1   0  -6   40.01    0.91 
   1   0   6   40.75    0.84 
   1   0   6   39.21    0.93 
  -2   0  -6  228.17    3.81 
  -2   0  -6  229.71    3.89 
   2   0   6  225.91    3.87 
   2   0   6  224.76    3.79 
  -3   0  -6   85.95    1.58 
  -3   0  -6   86.41    1.71 
   3   0   6   82.26    1.64 
   3   0   6   83.07    1.62 
  -4   0  -6  330.11    5.39 
  -4   0  -6  327.43    5.66 
   4   0   6  337.09    5.51 
   4   0   6  327.74    5.53 
  -5   0  -6    2.73    0.34 
  -5   0  -6    3.70    0.28 
   5   0   6    3.62    0.29 
   5   0   6    2.81    0.35 
  -6   0  -6  189.76    3.61 
  -6   0  -6  194.95    3.26 
   6   0   6  187.61    3.52 
   6   0   6  192.33    3.37 
  -7   0  -6    7.46    0.57 
   7   0   6    7.37    0.58 
   7   0   6    6.24    0.44 
  -8   0  -6  108.82    2.47 
   8   0   6  113.33    2.45 
  -9   0  -6    1.02    0.38 
   9   0   6    2.07    0.46 
 -10   0  -6   70.27    1.97 
  10   0   6   72.47    1.94 
 -11   0  -6   18.71    1.00 
  11   0   6   17.34    0.95 
 -12   0  -6   10.24    0.90 
  12   0   6   10.14    0.90 
  13  -1  -6   15.08    1.05 
  12  -1  -6   19.15    1.04 
  11  -1  -6    6.11    0.66 
 -11   1   6    6.13    0.65 
  10  -1  -6   28.20    1.09 
 -10   1   6   28.83    1.09 
   9  -1  -6   32.35    1.11 
  -9   1   6   34.17    1.03 
  -9   1   6   34.49    1.13 
   8  -1  -6    2.07    0.33 
   8  -1  -6    2.31    0.40 
  -8   1   6    2.46    0.36 
  -8   1   6    2.87    0.40 
   7  -1  -6  140.49    2.69 
   7  -1  -6  137.42    2.57 
  -7   1   6  136.74    2.66 
  -7   1   6  136.50    2.66 
   6  -1  -6   65.02    1.42 
   6  -1  -6   66.80    1.48 
  -6   1   6   67.43    1.47 
  -6   1   6   68.36    1.50 
   5  -1  -6  101.55    1.96 
   5  -1  -6  101.89    1.96 
  -5   1   6  102.02    1.94 
  -5   1   6   99.77    2.00 
   4  -1  -6    0.29    0.18 
   4  -1  -6    0.31    0.17 
  -4   1   6    0.57    0.16 
  -4   1   6    0.20    0.18 
   3  -1  -6  307.57    4.92 
   3  -1  -6  293.38    5.00 
  -3   1   6  295.87    5.06 
  -3   1   6  305.30    4.93 
   2  -1  -6   28.92    0.65 
   2  -1  -6   31.09    0.78 
  -2   1   6   28.14    0.75 
  -2   1   6   28.75    0.60 
   1  -1  -6  343.50    5.46 
   1  -1  -6  336.45    5.61 
  -1   1   6  347.80    5.45 
  -1   1   6  332.99    5.63 
   0  -1  -6    3.00    0.18 
   0  -1  -6    3.11    0.27 
   0   1   6    2.76    0.24 
   0   1   6    2.57    0.20 
  -1  -1  -6  520.10    8.33 
  -1  -1  -6  528.88    8.34 
   1   1   6  510.27    8.40 
   1   1   6  513.41    8.24 
  -2  -1  -6  415.31    6.72 
  -2  -1  -6  420.74    6.78 
   2   1   6  407.38    6.70 
   2   1   6  415.24    6.78 
  -3  -1  -6  203.36    3.53 
  -3  -1  -6  203.90    3.44 
   3   1   6  202.80    3.49 
   3   1   6  202.91    3.46 
  -4  -1  -6   85.82    1.74 
  -4  -1  -6   85.39    1.61 
   4   1   6   87.07    1.62 
   4   1   6   85.16    1.73 
  -5  -1  -6   83.34    1.59 
  -5  -1  -6   83.09    1.77 
   5   1   6   82.10    1.75 
   5   1   6   85.61    1.60 
  -6  -1  -6  138.66    2.75 
  -6  -1  -6  141.27    2.50 
   6   1   6  137.42    2.71 
   6   1   6  142.12    2.51 
  -7  -1  -6   11.57    0.66 
  -7  -1  -6   12.44    0.49 
   7   1   6   11.16    0.46 
   7   1   6   12.29    0.65 
  -8  -1  -6   75.85    1.87 
   8   1   6   77.96    1.87 
  -9  -1  -6    9.63    0.70 
   9   1   6    8.99    0.67 
 -10  -1  -6   23.05    1.00 
  10   1   6   23.28    1.01 
 -11  -1  -6   -0.33    0.35 
  11   1   6    0.32    0.42 
 -12  -1  -6   38.96    1.50 
  12   1   6   39.37    1.45 
  12  -2  -6   31.18    1.33 
  11  -2  -6    3.89    0.60 
  10  -2  -6   37.67    1.32 
 -10   2   6   40.44    1.21 
 -10   2   6   38.17    1.30 
   9  -2  -6    0.68    0.36 
  -9   2   6    0.82    0.34 
  -9   2   6    0.68    0.31 
   8  -2  -6   41.01    1.24 
  -8   2   6   41.48    1.19 
  -8   2   6   40.97    1.16 
   7  -2  -6   73.00    1.52 
   7  -2  -6   70.42    1.67 
  -7   2   6   70.78    1.63 
  -7   2   6   70.91    1.63 
   6  -2  -6  100.25    1.92 
   6  -2  -6   98.90    2.04 
  -6   2   6   94.84    2.01 
  -6   2   6   96.52    1.96 
   5  -2  -6   31.14    0.82 
   5  -2  -6   31.04    0.87 
  -5   2   6   29.61    0.80 
  -5   2   6   29.38    0.87 
   4  -2  -6   22.75    0.69 
   4  -2  -6   23.12    0.70 
  -4   2   6   24.32    0.64 
  -4   2   6   23.81    0.73 
   3  -2  -6  148.01    2.66 
   3  -2  -6  146.99    2.61 
  -3   2   6  147.41    2.70 
  -3   2   6  149.00    2.52 
   2  -2  -6    7.75    0.39 
   2  -2  -6    7.37    0.34 
  -2   2   6    7.79    0.39 
  -2   2   6    7.72    0.24 
   1  -2  -6  191.81    3.32 
  -1   2   6  193.12    3.21 
  -1   2   6  188.72    3.30 
  -1   2   6  190.30    3.06 
   0  -2  -6    7.87    0.20 
   0  -2  -6    7.47    0.40 
   0   2   6    8.03    0.33 
   0   2   6    7.29    0.35 
  -1  -2  -6  275.77    4.40 
  -1  -2  -6  274.41    4.52 
   1   2   6  272.23    4.51 
   1   2   6  261.98    4.45 
  -2  -2  -6   21.18    0.60 
  -2  -2  -6   22.40    0.55 
   2   2   6   22.09    0.62 
   2   2   6   22.31    0.58 
  -3  -2  -6  396.34    6.44 
  -3  -2  -6  389.55    6.37 
   3   2   6  389.37    6.41 
   3   2   6  388.59    6.37 
  -4  -2  -6    4.53    0.31 
  -4  -2  -6    5.18    0.35 
   4   2   6    5.93    0.37 
   4   2   6    4.93    0.30 
  -5  -2  -6  128.92    2.47 
  -5  -2  -6  128.93    2.34 
   5   2   6  131.69    2.28 
   5   2   6  128.12    2.47 
  -6  -2  -6    3.96    0.39 
  -6  -2  -6    4.41    0.33 
   6   2   6    4.34    0.30 
   6   2   6    4.68    0.43 
  -7  -2  -6  103.39    1.99 
  -7  -2  -6  102.90    2.21 
   7   2   6  106.09    2.22 
  -8  -2  -6   72.67    1.79 
  -8  -2  -6   75.44    1.56 
  -9  -2  -6   25.68    1.02 
   9   2   6   26.55    1.02 
 -10  -2  -6   14.93    0.82 
  10   2   6   16.50    0.87 
 -11  -2  -6   17.44    0.92 
  11   2   6   17.82    0.95 
 -12  -2  -6   29.37    1.28 
  12   2   6   28.17    1.21 
 -13  -2  -6    1.75    0.59 
  13   2   6    2.36    0.56 
  11  -3  -6    0.43    0.46 
  10  -3  -6   32.98    1.26 
 -10   3   6   33.30    1.15 
   9  -3  -6    0.54    0.39 
  -9   3   6    0.78    0.34 
   8  -3  -6   47.54    1.40 
  -8   3   6   46.94    1.32 
  -8   3   6   50.51    1.35 
   7  -3  -6   70.33    1.73 
  -7   3   6   73.92    1.71 
  -7   3   6   74.65    1.70 
   6  -3  -6  120.89    2.25 
   6  -3  -6  117.71    2.42 
  -6   3   6  123.25    2.36 
  -6   3   6  116.93    2.41 
   5  -3  -6   17.15    0.68 
   5  -3  -6   18.28    0.62 
  -5   3   6   19.43    0.71 
  -5   3   6   17.18    0.61 
   4  -3  -6   32.14    0.83 
   4  -3  -6   30.80    0.86 
  -4   3   6   31.00    0.77 
  -4   3   6   32.33    0.90 
   3  -3  -6   51.41    1.17 
   3  -3  -6   52.12    1.17 
  -3   3   6   51.96    1.21 
  -3   3   6   53.22    1.04 
   2  -3  -6   62.39    1.32 
   2  -3  -6   60.44    1.26 
  -2   3   6   61.19    1.09 
   1  -3  -6  360.12    5.95 
  -1   3   6  351.36    5.98 
  -1   3   6  370.11    5.90 
   0  -3  -6   59.31    1.26 
   0   3   6   61.41    1.23 
   0   3   6   60.43    1.22 
  -1  -3  -6    4.63    0.18 
  -1  -3  -6    4.39    0.32 
   1   3   6    4.67    0.28 
   1   3   6    4.64    0.28 
  -2  -3  -6   90.20    1.59 
  -2  -3  -6   90.51    1.72 
   2   3   6   91.30    1.73 
   2   3   6   89.28    1.64 
  -3  -3  -6  320.02    5.30 
  -3  -3  -6  323.24    5.33 
   3   3   6  319.11    5.24 
   3   3   6  323.30    5.36 
  -4  -3  -6   89.27    1.71 
  -4  -3  -6   88.19    1.72 
   4   3   6   88.32    1.58 
   4   3   6   89.77    1.81 
  -5  -3  -6   55.14    1.25 
  -5  -3  -6   54.93    1.21 
   5   3   6   56.42    1.31 
   5   3   6   55.79    1.06 
  -6  -3  -6    0.13    0.17 
  -6  -3  -6    0.65    0.23 
   6   3   6    0.12    0.14 
   6   3   6    1.08    0.26 
  -7  -3  -6   49.39    1.28 
  -7  -3  -6   51.71    1.17 
   7   3   6   46.40    1.28 
  -8  -3  -6    6.57    0.55 
  -8  -3  -6    7.07    0.43 
   8   3   6    7.23    0.58 
  -9  -3  -6   98.91    1.99 
  -9  -3  -6   98.12    2.24 
   9   3   6   98.10    2.25 
 -10  -3  -6   15.59    0.83 
  10   3   6   15.24    0.83 
 -11  -3  -6   20.23    0.96 
  11   3   6   19.62    0.98 
 -12  -3  -6   13.80    0.91 
  12   3   6   12.37    0.86 
 -13  -3  -6   22.41    1.17 
  13   3   6   21.26    1.14 
  11  -4  -6   13.65    0.97 
  10  -4  -6   47.12    1.56 
 -10   4   6   47.66    1.48 
   9  -4  -6    7.49    0.71 
  -9   4   6    8.94    0.66 
   8  -4  -6   34.04    1.20 
  -8   4   6   34.73    1.14 
   7  -4  -6    4.64    0.51 
  -7   4   6    4.30    0.48 
   6  -4  -6  138.72    2.83 
  -6   4   6  145.22    2.73 
  -6   4   6  137.78    2.79 
   5  -4  -6    1.32    0.26 
   5  -4  -6    0.76    0.29 
  -5   4   6    1.30    0.29 
  -5   4   6    1.37    0.26 
   4  -4  -6  135.49    2.61 
   4  -4  -6  140.31    2.50 
  -4   4   6  133.29    2.63 
  -4   4   6  134.18    2.47 
   3  -4  -6    1.58    0.26 
   3  -4  -6    1.70    0.27 
  -3   4   6    1.71    0.20 
  -3   4   6    0.83    0.23 
   2  -4  -6  101.88    1.98 
   2  -4  -6  101.26    1.97 
  -2   4   6  102.92    1.77 
   1  -4  -6   56.53    1.24 
  -1   4   6   55.69    1.24 
  -1   4   6   56.89    1.23 
   0  -4  -6  200.92    3.47 
   0   4   6  198.80    3.45 
   0   4   6  201.02    3.48 
  -1  -4  -6  132.65    2.14 
  -1  -4  -6  130.01    2.38 
   1   4   6  133.38    2.35 
   1   4   6  127.59    2.37 
  -2  -4  -6   38.70    0.76 
  -2  -4  -6   37.62    0.92 
   2   4   6   37.77    0.93 
   2   4   6   39.12    0.84 
  -3  -4  -6   17.95    0.50 
  -3  -4  -6   17.57    0.57 
   3   4   6   18.10    0.48 
   3   4   6   19.64    0.63 
  -4  -4  -6  112.14    2.13 
  -4  -4  -6  114.68    2.08 
   4   4   6  115.21    1.94 
   4   4   6  110.58    2.19 
  -5  -4  -6  140.76    2.60 
  -5  -4  -6  144.55    2.61 
   5   4   6  144.78    2.36 
   5   4   6  138.12    2.69 
  -6  -4  -6    7.60    0.41 
  -6  -4  -6    7.64    0.47 
   6   4   6    7.59    0.51 
  -7  -4  -6   53.94    1.27 
  -7  -4  -6   53.89    1.33 
   7   4   6   52.30    1.39 
  -8  -4  -6    8.81    0.55 
  -8  -4  -6    8.08    0.49 
   8   4   6    9.24    0.62 
  -9  -4  -6  128.39    2.47 
  -9  -4  -6  123.32    2.64 
   9   4   6  122.93    2.68 
 -10  -4  -6    4.48    0.44 
 -10  -4  -6    4.52    0.52 
  10   4   6    4.50    0.56 
 -11  -4  -6   70.32    1.89 
  11   4   6   69.49    1.91 
 -12  -4  -6    0.06    0.42 
  12   4   6    1.02    0.43 
  13   4   6   23.58    1.17 
  10  -5  -6    8.89    0.85 
 -10   5   6   10.09    0.76 
   9  -5  -6   49.20    1.60 
  -9   5   6   49.45    1.51 
   8  -5  -6   22.52    1.03 
  -8   5   6   27.21    1.04 
   7  -5  -6   22.99    0.97 
  -7   5   6   22.70    0.92 
   6  -5  -6   35.47    1.16 
  -6   5   6   35.37    1.12 
   5  -5  -6   45.10    1.27 
  -5   5   6   43.52    1.24 
   4  -5  -6  139.45    2.80 
   4  -5  -6  148.49    2.65 
  -4   5   6  142.32    2.65 
  -4   5   6  146.83    2.84 
   3  -5  -6   35.27    1.01 
   3  -5  -6   36.04    0.95 
  -3   5   6   35.59    0.84 
  -3   5   6   36.99    1.03 
   2  -5  -6   98.57    1.94 
   2  -5  -6   96.66    1.98 
  -2   5   6   98.84    1.75 
  -2   5   6  100.07    2.01 
   1  -5  -6    7.20    0.41 
  -1   5   6    6.21    0.39 
  -1   5   6    7.45    0.24 
  -1   5   6    6.92    0.40 
   0  -5  -6  276.68    4.69 
   0   5   6  274.29    4.70 
   0   5   6  275.46    4.44 
   0   5   6  283.28    4.74 
  -1  -5  -6   30.28    0.81 
  -1  -5  -6   29.59    0.58 
   1   5   6   30.29    0.82 
   1   5   6   29.32    0.77 
  -2  -5  -6  296.64    5.00 
  -2  -5  -6  302.46    4.83 
   2   5   6  289.51    5.00 
   2   5   6  300.30    4.94 
  -3  -5  -6   37.10    0.93 
  -3  -5  -6   36.76    0.79 
   3   5   6   36.10    0.80 
   3   5   6   34.61    0.94 
  -4  -5  -6  128.48    2.30 
  -4  -5  -6  128.68    2.41 
   4   5   6  130.65    2.20 
   4   5   6  124.16    2.44 
  -5  -5  -6   33.20    0.85 
  -5  -5  -6   31.54    0.89 
   5   5   6   32.05    0.94 
  -6  -5  -6  104.21    2.08 
  -6  -5  -6  104.05    2.07 
   6   5   6  103.77    2.18 
  -7  -5  -6  113.54    2.26 
  -7  -5  -6  115.28    2.30 
   7   5   6  113.17    2.38 
  -8  -5  -6   34.57    1.01 
  -8  -5  -6   34.73    1.06 
   8   5   6   35.02    1.00 
   8   5   6   35.98    1.15 
  -9  -5  -6   59.12    1.52 
   9   5   6   57.02    1.58 
   9   5   6   57.19    1.41 
 -10  -5  -6   16.12    0.82 
 -10  -5  -6   15.48    0.69 
  10   5   6   16.52    0.71 
  10   5   6   13.91    0.81 
 -11  -5  -6   76.43    1.76 
 -11  -5  -6   72.55    1.93 
  11   5   6   71.38    1.95 
 -12  -5  -6    1.53    0.48 
  12   5   6    0.29    0.37 
 -13  -5  -6   28.68    1.25 
  13   5   6   27.72    1.26 
 -10   6   6    0.85    0.49 
   9  -6  -6   45.98    1.59 
  -9   6   6   47.35    1.52 
   8  -6  -6    4.88    0.64 
  -8   6   6    4.49    0.58 
   7  -6  -6   57.01    1.67 
  -7   6   6   59.47    1.64 
   6  -6  -6    0.22    0.35 
  -6   6   6    0.31    0.34 
   5  -6  -6   76.49    1.82 
  -5   6   6   72.07    1.78 
   4  -6  -6   66.31    1.62 
  -4   6   6   64.01    1.60 
   3  -6  -6  182.02    3.48 
   3  -6  -6  192.31    3.36 
  -3   6   6  187.68    3.53 
   2  -6  -6  110.39    2.16 
   2  -6  -6  114.07    2.28 
  -2   6   6  114.22    2.29 
   1  -6  -6  105.29    2.07 
   1  -6  -6  110.13    2.16 
  -1   6   6  105.96    2.15 
  -1   6   6  108.19    1.87 
   0  -6  -6   68.18    1.46 
   0   6   6   68.35    1.51 
   0   6   6   69.70    1.50 
   0   6   6   70.41    1.24 
  -1  -6  -6   23.30    0.52 
  -1  -6  -6   23.23    0.72 
   1   6   6   24.16    0.71 
   1   6   6   23.52    0.74 
  -2  -6  -6  345.31    5.60 
  -2  -6  -6  340.84    5.78 
   2   6   6  347.47    5.75 
   2   6   6  346.71    5.80 
  -3  -6  -6    1.88    0.28 
  -3  -6  -6    1.47    0.18 
   3   6   6    1.59    0.21 
   3   6   6    1.05    0.24 
  -4  -6  -6   65.13    1.43 
  -4  -6  -6   63.44    1.27 
   4   6   6   59.15    1.43 
   4   6   6   64.00    1.22 
  -5  -6  -6   -0.16    0.17 
  -5  -6  -6    0.01    0.17 
   5   6   6   -0.27    0.19 
   5   6   6    0.04    0.12 
  -6  -6  -6  152.08    2.79 
  -6  -6  -6  148.62    2.84 
   6   6   6  149.57    2.92 
  -7  -6  -6   13.23    0.62 
  -7  -6  -6   13.18    0.60 
   7   6   6   11.58    0.63 
   7   6   6   11.03    0.58 
  -8  -6  -6  136.57    2.71 
   8   6   6  134.48    2.81 
   8   6   6  134.46    2.66 
  -9  -6  -6   23.55    0.90 
   9   6   6   24.74    0.98 
   9   6   6   22.85    0.84 
 -10  -6  -6   33.80    1.15 
  10   6   6   31.57    1.18 
  10   6   6   34.03    1.06 
 -11  -6  -6   30.62    1.15 
  11   6   6   31.33    1.04 
  11   6   6   28.77    1.17 
 -12  -6  -6   70.98    1.96 
  12   6   6   75.37    1.79 
  12   6   6   67.52    1.97 
 -13  -6  -6   42.53    1.50 
  13   6   6   38.81    1.49 
  14   6   6   13.67    0.98 
  -9   7   6   18.37    1.01 
   8  -7  -6   11.61    0.86 
  -8   7   6   11.34    0.82 
   7  -7  -6   86.10    2.21 
  -7   7   6   85.99    2.17 
   6  -7  -6    1.78    0.45 
  -6   7   6    1.48    0.43 
   5  -7  -6   53.13    1.52 
  -5   7   6   55.41    1.52 
   4  -7  -6    1.93    0.40 
  -4   7   6    1.70    0.38 
   3  -7  -6  187.17    3.58 
  -3   7   6  188.99    3.60 
   2  -7  -6    4.79    0.47 
   2  -7  -6    4.95    0.41 
  -2   7   6    4.86    0.47 
   1  -7  -6  166.81    3.14 
   1  -7  -6  167.05    3.03 
  -1   7   6  165.08    3.15 
   0  -7  -6    6.96    0.44 
   0   7   6    7.07    0.46 
   0   7   6    5.70    0.44 
  -1  -7  -6   41.33    1.05 
   1   7   6   39.55    1.07 
   1   7   6   40.65    1.03 
  -2  -7  -6   56.32    1.31 
  -2  -7  -6   56.02    1.10 
   2   7   6   56.74    1.34 
   2   7   6   57.01    1.26 
  -3  -7  -6  139.04    2.46 
  -3  -7  -6  139.84    2.65 
   3   7   6  141.32    2.55 
   3   7   6  142.75    2.70 
  -4  -7  -6  152.43    2.70 
  -4  -7  -6  150.36    2.86 
   4   7   6  151.45    2.89 
   4   7   6  154.57    2.68 
  -5  -7  -6   23.38    0.78 
  -5  -7  -6   23.35    0.70 
   5   7   6   23.15    0.81 
   5   7   6   23.29    0.59 
  -6  -7  -6   83.38    1.75 
  -6  -7  -6   86.10    1.86 
   6   7   6   84.91    1.91 
  -7  -7  -6   17.56    0.72 
  -7  -7  -6   18.77    0.70 
   7   7   6   19.56    0.82 
   7   7   6   18.45    0.73 
  -8  -7  -6  142.71    2.83 
   8   7   6  145.06    2.85 
   8   7   6  143.76    2.95 
  -9  -7  -6    3.17    0.43 
   9   7   6    3.97    0.46 
   9   7   6    3.80    0.48 
 -10  -7  -6   46.94    1.35 
  10   7   6   45.39    1.31 
  10   7   6   43.89    1.41 
 -11  -7  -6    0.36    0.37 
  11   7   6    0.75    0.35 
  11   7   6    0.49    0.39 
 -12  -7  -6   94.46    2.33 
  12   7   6   93.98    2.40 
 -13  -7  -6    2.33    0.46 
 -13  -7  -6    2.27    0.55 
  13   7   6    1.54    0.53 
  13   7   6    2.44    0.47 
 -14  -7  -6   39.75    1.53 
  14   7   6   42.90    1.62 
  -8   8   6   22.16    1.11 
   7  -8  -6   16.08    0.97 
  -7   8   6   16.90    0.96 
   6  -8  -6   64.37    1.84 
  -6   8   6   62.27    1.79 
   5  -8  -6   46.36    1.45 
  -5   8   6   45.99    1.44 
   4  -8  -6   26.82    1.04 
  -4   8   6   28.33    1.06 
   3  -8  -6   38.99    1.22 
  -3   8   6   38.38    1.22 
   2  -8  -6   45.08    1.29 
  -2   8   6   45.00    1.28 
   1  -8  -6   97.13    1.97 
   1  -8  -6   95.53    2.10 
   0  -8  -6    9.26    0.51 
   0  -8  -6    9.18    0.56 
   0   8   6    9.79    0.56 
  -1  -8  -6   56.68    1.32 
   1   8   6   53.98    1.33 
   1   8   6   56.97    1.40 
  -2  -8  -6   -0.03    0.22 
   2   8   6   -0.03    0.24 
   2   8   6   -0.08    0.20 
  -3  -8  -6  179.80    3.25 
   3   8   6  170.17    3.25 
   3   8   6  173.25    3.14 
  -4  -8  -6   27.39    0.74 
  -4  -8  -6   26.03    0.87 
   4   8   6   27.03    0.88 
   4   8   6   26.83    0.75 
  -5  -8  -6  146.66    2.81 
  -5  -8  -6  143.44    2.64 
   5   8   6  141.19    2.82 
  -6  -8  -6   56.46    1.30 
   6   8   6   55.91    1.45 
  -7  -8  -6   47.08    1.22 
  -7  -8  -6   46.71    1.28 
   7   8   6   49.16    1.37 
   7   8   6   49.85    1.31 
  -8  -8  -6   37.65    1.09 
   8   8   6   36.86    1.14 
   8   8   6   35.85    1.18 
  -9  -8  -6   69.41    1.70 
   9   8   6   70.19    1.75 
   9   8   6   72.07    1.84 
 -10  -8  -6   48.29    1.41 
  10   8   6   48.69    1.52 
  10   8   6   49.81    1.41 
 -11  -8  -6    7.73    0.68 
  11   8   6    7.88    0.65 
  11   8   6    8.29    0.75 
 -12  -8  -6   52.47    1.61 
  12   8   6   53.90    1.70 
  12   8   6   54.78    1.56 
 -13  -8  -6   10.55    0.87 
  13   8   6   10.57    0.75 
  13   8   6   11.25    0.92 
 -14  -8  -6   52.37    1.60 
 -14  -8  -6   51.81    1.75 
  14   8   6   54.82    1.84 
   6  -9  -6   43.66    1.52 
  -6   9   6   40.81    1.44 
   5  -9  -6   10.52    0.77 
  -5   9   6    7.72    0.73 
   4  -9  -6   27.74    1.13 
  -4   9   6   30.10    1.13 
   3  -9  -6    6.81    0.62 
  -3   9   6    5.97    0.58 
   2  -9  -6   26.50    1.00 
  -2   9   6   29.23    1.03 
   1  -9  -6   11.41    0.67 
  -1   9   6    9.71    0.61 
   0  -9  -6   82.06    1.77 
   0  -9  -6   79.91    1.88 
   0   9   6   83.85    1.91 
  -1  -9  -6   50.80    1.25 
   1   9   6   47.86    1.28 
   1   9   6   46.57    1.31 
  -2  -9  -6   27.24    0.88 
   2   9   6   26.96    0.89 
   2   9   6   28.06    0.95 
  -3  -9  -6   86.33    1.87 
   3   9   6   86.61    1.81 
   3   9   6   82.34    1.89 
  -4  -9  -6   19.77    0.78 
   4   9   6   20.64    0.70 
   4   9   6   20.03    0.80 
  -5  -9  -6  177.54    3.40 
  -5  -9  -6  179.15    3.22 
   5   9   6  179.19    3.42 
  -6  -9  -6    0.31    0.29 
  -6  -9  -6    0.46    0.24 
   6   9   6    0.74    0.32 
  -7  -9  -6   70.32    1.73 
  -7  -9  -6   73.99    1.64 
   7   9   6   71.73    1.78 
  -8  -9  -6    9.51    0.58 
   8   9   6    9.19    0.65 
   8   9   6    9.56    0.64 
  -9  -9  -6   85.68    1.97 
   9   9   6   85.60    2.04 
   9   9   6   86.68    2.11 
 -10  -9  -6   11.43    0.70 
  10   9   6   11.13    0.72 
  10   9   6   11.67    0.77 
 -11  -9  -6   50.41    1.51 
  11   9   6   52.66    1.54 
  11   9   6   52.42    1.63 
 -12  -9  -6   21.60    1.03 
  12   9   6   23.45    1.02 
  12   9   6   20.62    1.07 
 -13  -9  -6   14.16    0.92 
  13   9   6   15.29    0.98 
  13   9   6   15.80    0.88 
 -14  -9  -6   11.38    0.82 
  14   9   6   11.99    0.83 
  14   9   6   10.66    0.96 
   5 -10  -6    2.69    0.54 
  -5  10   6    3.14    0.55 
   4 -10  -6   68.61    1.93 
  -4  10   6   65.39    1.88 
   3 -10  -6    1.32    0.45 
  -3  10   6    1.07    0.42 
   2 -10  -6   21.05    0.95 
  -2  10   6   22.05    0.97 
   1 -10  -6    0.50    0.36 
  -1  10   6    0.07    0.34 
   0 -10  -6   63.85    1.65 
   0  10   6   62.56    1.64 
  -1 -10  -6   21.11    0.87 
  -1 -10  -6   20.07    0.79 
   1  10   6   21.00    0.85 
  -2 -10  -6   77.83    1.76 
   2  10   6   78.10    1.85 
   2  10   6   77.14    1.79 
  -3 -10  -6   24.03    0.88 
   3  10   6   26.51    0.87 
   3  10   6   24.37    0.92 
  -4 -10  -6    6.43    0.54 
   4  10   6    8.11    0.52 
   4  10   6    8.13    0.56 
  -5 -10  -6   33.39    1.07 
   5  10   6   31.30    1.06 
  -6 -10  -6   62.34    1.61 
   6  10   6   64.01    1.63 
  -7 -10  -6   53.18    1.49 
  -7 -10  -6   54.54    1.35 
   7  10   6   53.97    1.50 
  -8 -10  -6    3.93    0.50 
  -8 -10  -6    4.09    0.45 
   8  10   6    3.98    0.49 
   8  10   6    3.56    0.50 
  -9 -10  -6   47.85    1.36 
   9  10   6   49.37    1.48 
   9  10   6   47.60    1.43 
 -10 -10  -6    0.25    0.34 
  10  10   6    0.59    0.37 
  10  10   6    1.22    0.44 
 -11 -10  -6   62.82    1.72 
  11  10   6   65.10    1.88 
 -12 -10  -6    0.01    0.40 
  12  10   6   -0.13    0.38 
  12  10   6    0.11    0.43 
 -13 -10  -6   18.70    1.02 
  13  10   6   18.97    1.08 
  14  10   6    1.96    0.58 
   4 -11  -6   25.13    1.17 
  -4  11   6   23.83    1.16 
   3 -11  -6   28.77    1.20 
  -3  11   6   27.86    1.20 
   2 -11  -6   47.14    1.50 
  -2  11   6   44.84    1.49 
   1 -11  -6    0.51    0.39 
  -1  11   6    0.73    0.42 
   0 -11  -6   40.61    1.31 
   0  11   6   41.97    1.33 
  -1 -11  -6    1.38    0.39 
   1  11   6    1.87    0.42 
  -2 -11  -6   61.10    1.55 
   2  11   6   62.57    1.61 
   2  11   6   64.94    1.67 
  -3 -11  -6    2.53    0.42 
   3  11   6    1.65    0.39 
   3  11   6    2.21    0.39 
  -4 -11  -6   14.59    0.73 
   4  11   6   13.38    0.73 
   4  11   6   15.23    0.69 
  -5 -11  -6   14.63    0.73 
   5  11   6   13.46    0.73 
  -6 -11  -6   71.24    1.79 
   6  11   6   69.76    1.78 
  -7 -11  -6   14.02    0.78 
   7  11   6   16.03    0.80 
  -8 -11  -6   31.31    1.14 
   8  11   6   29.93    1.13 
  -9 -11  -6   33.22    1.19 
  -9 -11  -6   34.76    1.12 
   9  11   6   33.83    1.20 
   9  11   6   35.73    1.26 
 -10 -11  -6    5.35    0.57 
  10  11   6    5.37    0.62 
  10  11   6    6.56    0.68 
 -11 -11  -6   35.57    1.24 
  11  11   6   36.31    1.35 
  11  11   6   38.15    1.35 
 -12 -11  -6   24.27    1.08 
  12  11   6   24.21    1.16 
  12  11   6   23.01    1.09 
 -13 -11  -6   18.68    1.01 
  13  11   6   17.44    1.06 
   3 -12  -6   40.44    1.51 
   2 -12  -6   19.35    1.02 
  -2  12   6   20.71    1.07 
   1 -12  -6   25.54    1.12 
  -1  12   6   24.41    1.12 
   0 -12  -6   49.98    1.56 
   0  12   6   52.54    1.60 
  -1 -12  -6    0.79    0.39 
   1  12   6    0.28    0.37 
  -2 -12  -6   49.53    1.48 
   2  12   6   51.46    1.49 
   3  12   6   20.68    0.91 
   3  12   6   18.71    0.90 
  -4 -12  -6   45.73    1.36 
   4  12   6   45.35    1.39 
  -5 -12  -6   -0.02    0.33 
   5  12   6    0.82    0.37 
  -6 -12  -6   53.98    1.55 
   6  12   6   54.10    1.54 
  -7 -12  -6    0.05    0.34 
   7  12   6    0.34    0.35 
  -8 -12  -6   57.83    1.68 
   8  12   6   60.33    1.69 
  -9 -12  -6    1.86    0.48 
   9  12   6    1.95    0.48 
 -10 -12  -6   25.63    1.12 
  10  12   6   28.22    1.17 
 -11 -12  -6   14.07    0.84 
  11  12   6   15.25    0.92 
  11  12   6   13.43    0.85 
 -12 -12  -6   26.22    1.15 
  12  12   6   26.46    1.22 
 -13 -12  -6    9.93    0.86 
  13  12   6   11.13    0.95 
   1 -13  -6   46.76    1.60 
  -1  13   6   48.90    1.65 
   0 -13  -6   10.00    0.82 
   0  13   6   10.90    0.87 
  -1 -13  -6   24.29    1.09 
   1  13   6   25.97    1.12 
  -2 -13  -6   17.87    0.92 
   2  13   6   16.55    0.91 
  -3 -13  -6   40.73    1.37 
   3  13   6   42.14    1.35 
   4  13   6   29.50    1.15 
  -5 -13  -6   29.05    1.12 
   5  13   6   28.29    1.12 
  -6 -13  -6   64.72    1.78 
   6  13   6   63.83    1.78 
  -7 -13  -6    7.43    0.70 
   7  13   6    7.20    0.69 
  -8 -13  -6   33.69    1.26 
   8  13   6   33.47    1.24 
  -9 -13  -6    8.06    0.75 
   9  13   6    8.25    0.74 
 -10 -13  -6   36.33    1.39 
  10  13   6   38.21    1.38 
  11  13   6    1.87    0.54 
  -1 -14  -6   57.01    1.77 
   1  14   6   56.39    1.78 
  -2 -14  -6   -0.05    0.43 
   2  14   6    0.46    0.47 
  -3 -14  -6   46.36    1.52 
  -4 -14  -6    9.73    0.78 
   5  14   6   49.53    1.57 
  -6 -14  -6   17.99    0.95 
   6  14   6   17.43    0.98 
  -7 -14  -6   28.00    1.18 
   7  14   6   26.47    1.14 
  -8 -14  -6   14.12    0.90 
   8  14   6   13.36    0.88 
  -9 -14  -6   19.20    1.04 
  -4 -15  -6    1.28    0.49 
  -7 -15  -6   48.19    1.63 
   8  13  -7    7.96    0.78 
  -5 -13   7   27.89    1.25 
  -4 -13   7    8.81    0.84 
   9  12  -7    1.66    0.51 
  -9 -12   7    1.19    0.47 
   8  12  -7   40.37    1.41 
  -8 -12   7   36.64    1.43 
   7  12  -7   -0.12    0.39 
  -7 -12   7    1.05    0.47 
   6  12  -7   23.73    1.14 
   5  12  -7    3.66    0.57 
  -5 -12   7    3.18    0.58 
   4  12  -7   42.49    1.51 
  -4 -12   7   41.84    1.48 
   3  12  -7   22.60    1.15 
  -3 -12   7   25.10    1.14 
   2  12  -7    5.85    0.71 
  -2 -12   7    5.26    0.69 
   1  12  -7    8.66    0.86 
  -1 -12   7    7.42    0.79 
  10  11  -7    9.01    0.78 
 -10 -11   7    8.30    0.80 
   9  11  -7   14.68    0.89 
  -9 -11   7   15.10    0.93 
   8  11  -7   69.38    1.90 
  -8 -11   7   70.48    1.99 
   7  11  -7    1.44    0.44 
  -7 -11   7    1.68    0.45 
   6  11  -7   36.96    1.34 
   6  11  -7   38.96    1.28 
  -6 -11   7   36.08    1.30 
   5  11  -7    2.15    0.46 
  -5 -11   7    1.40    0.45 
   4  11  -7   37.41    1.38 
  -4 -11   7   37.32    1.33 
   3  11  -7    8.61    0.77 
  -3 -11   7   10.71    0.79 
   2  11  -7   37.79    1.42 
  -2 -11   7   40.17    1.42 
   1  11  -7    6.19    0.72 
  -1 -11   7    6.59    0.72 
   0  11  -7   16.66    0.99 
   0 -11   7   15.50    0.96 
  -1  11  -7    4.08    0.66 
   1 -11   7    2.47    0.55 
  11  10  -7   46.64    1.56 
 -11 -10   7   45.23    1.59 
  10  10  -7    6.91    0.70 
 -10 -10   7    6.43    0.68 
   9  10  -7   24.93    1.07 
  -9 -10   7   21.95    1.06 
   8  10  -7   28.90    1.12 
  -8 -10   7   27.97    1.16 
   7  10  -7   23.19    0.98 
  -7 -10   7   23.38    1.01 
   6  10  -7  100.88    2.28 
   6  10  -7   99.24    2.41 
  -6 -10   7   99.11    2.31 
   5  10  -7    2.38    0.43 
   5  10  -7    2.36    0.48 
  -5 -10   7    2.95    0.49 
   4  10  -7   16.98    0.90 
  -4 -10   7   17.94    0.89 
   3  10  -7    2.99    0.48 
  -3 -10   7    2.84    0.47 
   2  10  -7   68.52    1.88 
  -2 -10   7   67.05    1.86 
   1  10  -7    0.40    0.39 
  -1 -10   7    0.41    0.40 
   0  10  -7   52.43    1.65 
   0 -10   7   52.33    1.65 
  -1  10  -7    0.26    0.43 
   1 -10   7    0.28    0.43 
  -2  10  -7   29.74    1.30 
   2 -10   7   29.19    1.25 
  -3  10  -7    1.97    0.57 
   3 -10   7    1.15    0.50 
  12   9  -7    2.34    0.56 
 -12  -9   7    2.15    0.55 
  11   9  -7   72.21    2.00 
 -11  -9   7   74.63    2.07 
  10   9  -7   -0.04    0.33 
 -10  -9   7   -0.23    0.36 
   9   9  -7   59.55    1.67 
  -9  -9   7   54.52    1.66 
   8   9  -7    2.11    0.44 
  -8  -9   7    1.93    0.44 
   7   9  -7   70.66    1.78 
  -7  -9   7   69.95    1.85 
   6   9  -7   29.21    1.10 
   6   9  -7   29.90    1.02 
  -6  -9   7   28.46    1.05 
   5   9  -7   95.15    2.29 
   5   9  -7   98.57    2.14 
  -5  -9   7   96.02    2.22 
   4   9  -7   42.08    1.19 
   4   9  -7   39.60    1.29 
  -4  -9   7   41.08    1.29 
   3   9  -7   21.76    0.93 
  -3  -9   7   21.70    0.94 
   2   9  -7   34.18    1.22 
  -2  -9   7   32.75    1.17 
   1   9  -7   55.02    1.64 
  -1  -9   7   60.27    1.67 
   0   9  -7   94.08    2.32 
   0  -9   7   92.01    2.28 
  -1   9  -7    0.64    0.42 
   1  -9   7    0.67    0.40 
  -2   9  -7   26.86    1.18 
   2  -9   7   26.44    1.13 
  -3   9  -7    0.85    0.47 
   3  -9   7    0.98    0.44 
  -4   9  -7   27.86    1.28 
   4  -9   7   28.01    1.22 
  -5   9  -7    0.05    0.49 
  13   8  -7    3.79    0.62 
 -13  -8   7    3.81    0.65 
  12   8  -7   14.10    0.88 
 -12  -8   7   13.13    0.90 
  11   8  -7   30.24    1.18 
 -11  -8   7   30.65    1.23 
  10   8  -7   26.43    1.08 
 -10  -8   7   24.76    1.08 
   9   8  -7   79.61    2.01 
  -9  -8   7   82.54    2.07 
   8   8  -7    1.07    0.35 
  -8  -8   7    1.24    0.37 
   7   8  -7   38.34    1.18 
  -7  -8   7   35.31    1.21 
  -7  -8   7   36.76    1.17 
   6   8  -7    2.48    0.41 
   6   8  -7    2.84    0.42 
  -6  -8   7    2.40    0.40 
  -6  -8   7    3.08    0.44 
   5   8  -7  245.00    4.43 
   5   8  -7  246.81    4.62 
  -5  -8   7  242.96    4.53 
   4   8  -7    0.74    0.32 
   4   8  -7    0.13    0.26 
  -4  -8   7    0.24    0.32 
   3   8  -7  176.19    3.21 
   3   8  -7  168.57    3.43 
  -3  -8   7  169.30    3.39 
   2   8  -7    7.99    0.62 
   2   8  -7    8.33    0.51 
  -2  -8   7    9.08    0.64 
   1   8  -7  128.74    2.81 
  -1  -8   7  132.40    2.80 
   0   8  -7   26.87    1.05 
   0  -8   7   29.13    1.09 
  -1   8  -7   70.31    1.90 
   1  -8   7   75.52    1.92 
  -2   8  -7   45.71    1.50 
   2  -8   7   47.63    1.46 
  -3   8  -7   10.62    0.79 
   3  -8   7   10.35    0.75 
  -4   8  -7   29.79    1.25 
   4  -8   7   30.66    1.22 
  -5   8  -7   23.15    1.17 
   5  -8   7   22.94    1.09 
  -6   8  -7   33.16    1.43 
   6  -8   7   31.98    1.31 
  13   7  -7    1.47    0.50 
 -13  -7   7    1.48    0.52 
  12   7  -7   49.25    1.58 
 -12  -7   7   54.68    1.69 
  11   7  -7    7.53    0.69 
 -11  -7   7    7.22    0.70 
  10   7  -7   52.65    1.54 
 -10  -7   7   52.34    1.56 
   9   7  -7   25.08    0.99 
  -9  -7   7   25.19    1.02 
  -8  -7   7   62.71    1.67 
   7   7  -7   37.90    1.16 
  -7  -7   7   39.88    1.17 
  -7  -7   7   38.19    1.21 
   6   7  -7   56.86    1.46 
  -6  -7   7   56.94    1.48 
  -6  -7   7   55.93    1.51 
   5   7  -7   77.29    1.74 
   5   7  -7   75.27    1.82 
  -5  -7   7   73.26    1.77 
   4   7  -7  123.46    2.46 
   4   7  -7  123.94    2.59 
  -4  -7   7  123.68    2.56 
   3   7  -7  215.60    4.16 
   3   7  -7  226.57    3.96 
  -3  -7   7  224.14    4.14 
   2   7  -7    3.53    0.45 
   2   7  -7    3.71    0.37 
  -2  -7   7    3.04    0.41 
   1   7  -7   99.93    1.90 
   1   7  -7   93.05    2.17 
  -1  -7   7   94.71    2.15 
   0   7  -7    8.96    0.60 
   0  -7   7    8.42    0.61 
  -1   7  -7  117.27    2.61 
   1  -7   7  118.76    2.58 
  -2   7  -7    1.49    0.42 
   2  -7   7    1.10    0.35 
  -3   7  -7   79.83    2.11 
   3  -7   7   84.93    2.07 
  -4   7  -7   11.84    0.79 
   4  -7   7   12.38    0.77 
  -5   7  -7   41.38    1.49 
   5  -7   7   42.45    1.32 
   5  -7   7   39.84    1.37 
  -6   7  -7    5.52    0.69 
   6  -7   7    4.48    0.60 
   6  -7   7    5.16    0.63 
  -7   7  -7   25.94    1.26 
   7  -7   7   29.35    1.21 
   7  -7   7   28.80    1.22 
  13   6  -7   14.52    0.89 
 -13  -6   7   16.16    0.97 
  12   6  -7   62.61    1.77 
 -12  -6   7   65.28    1.86 
  11   6  -7    0.56    0.38 
 -11  -6   7    0.47    0.41 
  10   6  -7   59.04    1.62 
 -10  -6   7   59.83    1.66 
   9   6  -7   -0.38    0.26 
  -9  -6   7    0.02    0.30 
   8   6  -7  113.41    2.43 
  -8  -6   7  112.14    2.46 
   7   6  -7    7.90    0.57 
  -7  -6   7    8.74    0.56 
  -7  -6   7    9.14    0.57 
   6   6  -7   90.67    1.98 
  -6  -6   7   89.04    2.02 
  -6  -6   7   91.65    2.00 
   5   6  -7   33.11    0.98 
   5   6  -7   33.44    1.04 
  -5  -6   7   32.27    1.03 
   4   6  -7  117.94    2.35 
   4   6  -7  121.19    2.47 
  -4  -6   7  117.10    2.43 
   3   6  -7   23.18    0.75 
   3   6  -7   21.44    0.81 
  -3  -6   7   21.00    0.81 
   2   6  -7  159.35    2.88 
   2   6  -7  158.99    3.09 
  -2  -6   7  154.89    3.06 
   1   6  -7   50.30    1.34 
   1   6  -7   49.52    1.13 
  -1  -6   7   48.82    1.31 
   0   6  -7   30.39    1.00 
   0  -6   7   28.88    0.97 
  -1   6  -7   16.02    0.77 
   1  -6   7   16.22    0.73 
  -2   6  -7   60.59    1.64 
   2  -6   7   60.27    1.58 
   2  -6   7   60.29    1.39 
  -3   6  -7  124.98    2.79 
   3  -6   7  124.05    2.68 
   3  -6   7  129.09    2.52 
  -4   6  -7    1.13    0.42 
   4  -6   7    0.38    0.34 
   4  -6   7    1.34    0.37 
  -5   6  -7   60.08    1.80 
   5  -6   7   64.39    1.63 
   5  -6   7   61.09    1.69 
  -6   6  -7    0.55    0.44 
   6  -6   7    1.25    0.42 
   6  -6   7    0.15    0.37 
  -7   6  -7   45.17    1.61 
   7  -6   7   42.45    1.44 
   7  -6   7   45.19    1.46 
  -8   6  -7    1.15    0.54 
   8  -6   7    1.05    0.53 
   8  -6   7    1.41    0.48 
  14   5  -7    2.80    0.54 
 -14  -5   7    4.03    0.67 
  13   5  -7   19.02    0.95 
 -13  -5   7   18.68    1.03 
  12   5  -7   20.28    0.95 
 -12  -5   7   22.98    1.06 
  11   5  -7   31.52    1.11 
 -11  -5   7   30.87    1.17 
  10   5  -7   40.52    1.26 
 -10  -5   7   39.76    1.29 
   9   5  -7   10.50    0.62 
  -9  -5   7    9.19    0.60 
   8   5  -7   63.54    1.61 
  -8  -5   7   64.37    1.63 
  -8  -5   7   67.41    1.54 
  -7  -5   7   46.68    1.23 
  -7  -5   7   46.87    1.29 
   6   5  -7  196.94    3.62 
  -6  -5   7  199.27    3.63 
  -6  -5   7  192.20    3.66 
   5   5  -7    0.75    0.25 
   5   5  -7    0.06    0.22 
  -5  -5   7   -0.02    0.25 
   4   5  -7   62.08    1.47 
   4   5  -7   61.69    1.42 
  -4  -5   7   62.53    1.50 
   3   5  -7    0.26    0.21 
   3   5  -7   -0.06    0.19 
  -3  -5   7    0.14    0.24 
   2   5  -7  169.14    3.07 
   2   5  -7  174.59    3.24 
  -2  -5   7  170.95    3.23 
   1   5  -7    2.04    0.26 
   1   5  -7    2.10    0.32 
  -1  -5   7    2.70    0.36 
   0   5  -7  106.79    2.24 
   0   5  -7  105.15    1.97 
   0  -5   7  105.45    2.22 
   0  -5   7  108.23    1.93 
  -1   5  -7   23.53    0.88 
   1  -5   7   23.93    0.84 
   1  -5   7   24.01    0.70 
  -2   5  -7   64.10    1.63 
   2  -5   7   61.95    1.39 
  -3   5  -7   30.49    1.07 
   3  -5   7   31.12    1.03 
   3  -5   7   30.22    0.94 
  -4   5  -7   83.33    2.08 
   4  -5   7   82.43    1.97 
   4  -5   7   87.75    1.90 
  -5   5  -7   38.87    1.34 
   5  -5   7   38.16    1.18 
   5  -5   7   37.16    1.21 
  -6   5  -7    7.06    0.69 
   6  -5   7    6.98    0.64 
   6  -5   7    6.77    0.61 
  -7   5  -7   38.72    1.44 
   7  -5   7   39.67    1.33 
   7  -5   7   37.80    1.28 
  -8   5  -7   11.73    0.86 
   8  -5   7   13.58    0.87 
   8  -5   7   13.76    0.84 
  -9   5  -7   39.32    1.58 
   9  -5   7   40.86    1.48 
 -14  -4   7    0.38    0.52 
  13   4  -7   15.30    0.83 
 -13  -4   7   14.35    0.94 
  12   4  -7    0.44    0.37 
 -12  -4   7    0.12    0.40 
  11   4  -7   75.88    1.86 
 -11  -4   7   72.91    1.93 
  10   4  -7    6.54    0.57 
 -10  -4   7    7.23    0.63 
   9   4  -7   67.78    1.68 
  -9  -4   7   69.07    1.72 
   8   4  -7   11.79    0.64 
  -8  -4   7   11.28    0.64 
  -8  -4   7   12.68    0.60 
   7   4  -7   60.44    1.47 
  -7  -4   7   61.55    1.43 
  -7  -4   7   60.34    1.47 
   6   4  -7   59.40    1.40 
  -6  -4   7   57.56    1.39 
  -6  -4   7   55.62    1.38 
  -5  -4   7   58.66    1.39 
  -5  -4   7   57.40    1.37 
   4   4  -7   37.86    1.00 
   4   4  -7   36.73    0.99 
  -4  -4   7   36.69    1.04 
   3   4  -7    4.20    0.37 
   3   4  -7    3.59    0.34 
  -3  -4   7    3.70    0.38 
   2   4  -7  109.80    2.17 
   2   4  -7  107.93    2.07 
  -2  -4   7  109.93    2.20 
   1   4  -7   69.51    1.43 
   1   4  -7   70.77    1.57 
  -1  -4   7   71.47    1.25 
  -1  -4   7   69.51    1.56 
   0   4  -7  309.86    5.44 
   0   4  -7  315.45    5.17 
   0  -4   7  318.88    5.07 
   0  -4   7  305.99    5.41 
  -1   4  -7    0.85    0.18 
  -1   4  -7    1.43    0.30 
   1  -4   7    0.75    0.20 
   1  -4   7    0.58    0.25 
  -2   4  -7   34.04    1.06 
   2  -4   7   34.82    0.90 
  -3   4  -7   12.51    0.66 
   3  -4   7   11.75    0.56 
   3  -4   7   13.54    0.64 
  -4   4  -7  148.93    3.10 
   4  -4   7  150.45    2.86 
   4  -4   7  147.25    2.94 
  -5   4  -7    4.45    0.54 
   5  -4   7    4.71    0.49 
   5  -4   7    5.75    0.53 
  -6   4  -7   43.73    1.41 
   6  -4   7   43.95    1.29 
   6  -4   7   42.90    1.30 
  -7   4  -7   29.52    1.20 
   7  -4   7   31.56    1.15 
   7  -4   7   30.48    1.09 
  -8   4  -7   10.46    0.77 
   8  -4   7   10.42    0.77 
   8  -4   7   12.61    0.76 
  -9   4  -7   14.48    0.96 
   9  -4   7   13.52    0.90 
  10  -4   7   25.13    1.22 
 -14  -3   7    2.75    0.63 
 -13  -3   7   13.76    0.93 
  12   3  -7    0.66    0.37 
 -12  -3   7    1.13    0.45 
  11   3  -7   55.49    1.50 
 -11  -3   7   54.28    1.59 
  10   3  -7    4.08    0.48 
 -10  -3   7    4.61    0.51 
   9   3  -7  100.85    2.14 
  -9  -3   7   94.78    2.17 
   8   3  -7    0.86    0.30 
  -8  -3   7    2.30    0.34 
  -8  -3   7    1.17    0.32 
   7   3  -7   84.65    1.83 
  -7  -3   7   85.08    1.79 
  -7  -3   7   82.06    1.83 
   6   3  -7   11.76    0.58 
   6   3  -7   11.53    0.43 
  -6  -3   7   12.13    0.56 
  -6  -3   7   11.94    0.56 
   5   3  -7  175.26    2.92 
   5   3  -7  180.30    3.27 
  -5  -3   7  182.25    3.30 
  -5  -3   7  178.45    3.27 
   4   3  -7   25.25    0.78 
   4   3  -7   25.33    0.76 
  -4  -3   7   26.04    0.82 
   3   3  -7   79.91    1.65 
  -3  -3   7   80.94    1.73 
   2   3  -7  194.37    3.44 
   2   3  -7  192.05    3.37 
  -2  -3   7  192.60    3.50 
   1   3  -7   43.04    1.06 
   1   3  -7   43.03    1.00 
  -1  -3   7   46.32    1.12 
   0   3  -7   78.19    1.52 
   0   3  -7   77.67    1.65 
   0  -3   7   77.85    1.40 
  -1   3  -7   60.08    1.39 
  -1   3  -7   59.41    1.20 
   1  -3   7   58.23    1.35 
   1  -3   7   58.19    1.18 
  -2   3  -7  129.16    2.27 
  -2   3  -7  133.24    2.60 
   2  -3   7  127.99    2.51 
   2  -3   7  129.93    2.37 
  -3   3  -7   12.26    0.63 
   3  -3   7   10.80    0.54 
   3  -3   7   11.01    0.52 
  -4   3  -7   53.59    1.42 
   4  -3   7   49.62    1.28 
   4  -3   7   49.50    1.26 
  -5   3  -7    3.71    0.48 
   5  -3   7    4.65    0.46 
   5  -3   7    3.23    0.39 
  -6   3  -7   72.84    1.88 
   6  -3   7   74.36    1.73 
   6  -3   7   71.62    1.75 
  -7   3  -7    7.97    0.70 
   7  -3   7    7.67    0.64 
   7  -3   7    8.08    0.57 
  -8   3  -7   51.13    1.64 
   8  -3   7   53.32    1.45 
   8  -3   7   52.31    1.56 
  -9   3  -7    2.55    0.55 
   9  -3   7    2.13    0.52 
 -10   3  -7   42.46    1.60 
  10  -3   7   42.81    1.54 
 -14  -2   7   33.93    1.44 
 -13  -2   7   11.64    0.95 
 -12  -2   7   30.01    1.21 
  11   2  -7   36.07    1.17 
 -11  -2   7   38.82    1.30 
  10   2  -7   32.20    1.04 
 -10  -2   7   29.99    1.09 
   9   2  -7   86.22    1.88 
   9   2  -7   85.63    1.91 
  -9  -2   7   83.03    1.96 
  -9  -2   7   86.10    1.85 
   8   2  -7   56.99    1.32 
   8   2  -7   53.40    1.37 
  -8  -2   7   55.60    1.40 
  -8  -2   7   55.75    1.33 
   7   2  -7  108.22    2.05 
   7   2  -7  105.38    2.18 
  -7  -2   7  107.87    2.19 
  -7  -2   7  106.72    2.15 
   6   2  -7    6.25    0.36 
   6   2  -7    6.03    0.46 
  -6  -2   7    5.46    0.40 
  -6  -2   7    6.24    0.45 
   5   2  -7  111.92    2.18 
   5   2  -7  108.91    1.93 
  -5  -2   7  109.40    2.14 
  -5  -2   7  112.44    2.19 
   4   2  -7    0.29    0.11 
   4   2  -7    0.02    0.16 
  -4  -2   7   -0.11    0.15 
  -4  -2   7    0.41    0.22 
   3   2  -7  246.05    4.26 
   3   2  -7  252.95    4.27 
  -3  -2   7  247.37    4.36 
   2   2  -7   89.55    1.73 
  -2  -2   7   89.52    1.83 
   1   2  -7   92.28    1.78 
   1   2  -7   91.78    1.77 
   0   2  -7  174.04    3.03 
   0   2  -7  172.23    3.11 
   0  -2   7  175.47    3.16 
   0  -2   7  177.12    2.88 
  -1   2  -7  174.98    3.05 
  -1   2  -7  179.31    3.22 
   1  -2   7  181.13    3.00 
   1  -2   7  174.79    3.20 
  -2   2  -7   25.55    0.68 
  -2   2  -7   26.75    0.81 
   2  -2   7   26.17    0.78 
   2  -2   7   26.12    0.71 
  -3   2  -7   36.31    1.03 
  -3   2  -7   35.54    0.81 
   3  -2   7   36.00    0.92 
   3  -2   7   36.77    0.96 
  -4   2  -7  148.25    2.92 
   4  -2   7  146.39    2.77 
   4  -2   7  144.90    2.74 
  -5   2  -7    6.07    0.53 
   5  -2   7    6.48    0.50 
   5  -2   7    5.63    0.45 
  -6   2  -7   70.55    1.81 
   6  -2   7   73.39    1.74 
   6  -2   7   74.49    1.66 
  -7   2  -7   20.89    0.94 
   7  -2   7   21.13    0.81 
   7  -2   7   22.96    0.93 
  -8   2  -7   69.80    1.92 
   8  -2   7   74.09    1.89 
   8  -2   7   74.03    1.72 
  -9   2  -7    0.64    0.43 
   9  -2   7    0.62    0.43 
 -10   2  -7   29.39    1.26 
  10  -2   7   31.40    1.28 
 -11   2  -7    3.74    0.67 
  11  -2   7    2.71    0.61 
 -13  -1   7    0.19    0.47 
 -12  -1   7   72.04    1.99 
  11   1  -7   10.33    0.72 
 -11  -1   7   10.28    0.74 
  10   1  -7   42.14    1.20 
  10   1  -7   41.50    1.27 
 -10  -1   7   41.10    1.31 
   9   1  -7   21.19    0.82 
   9   1  -7   21.49    0.80 
  -9  -1   7   19.99    0.84 
  -9  -1   7   20.84    0.79 
   8   1  -7   75.73    1.70 
   8   1  -7   75.85    1.68 
  -8  -1   7   73.97    1.74 
  -8  -1   7   78.33    1.69 
   7   1  -7   44.33    1.14 
   7   1  -7   42.42    1.08 
  -7  -1   7   44.92    1.14 
  -7  -1   7   41.77    1.12 
   6   1  -7   63.84    1.44 
   6   1  -7   61.97    1.33 
  -6  -1   7   64.42    1.42 
  -6  -1   7   63.84    1.43 
   5   1  -7   69.60    1.51 
   5   1  -7   70.40    1.37 
  -5  -1   7   70.18    1.45 
  -5  -1   7   70.04    1.51 
   4   1  -7   38.47    0.80 
   4   1  -7   38.37    0.98 
  -4  -1   7   38.92    1.00 
  -4  -1   7   38.34    0.90 
   3   1  -7  278.17    4.76 
   3   1  -7  281.84    4.49 
  -3  -1   7  280.14    4.84 
  -3  -1   7  285.20    4.72 
   2   1  -7   40.24    0.97 
   2   1  -7   40.88    0.74 
   2   1  -7   39.89    0.89 
  -2  -1   7   40.96    1.03 
   1   1  -7  286.36    4.67 
   1   1  -7  270.04    4.67 
  -1  -1   7  280.80    4.43 
  -1  -1   7  277.71    4.78 
   0   1  -7   33.41    0.82 
   0   1  -7   34.41    0.86 
   0  -1   7   35.61    0.92 
   0  -1   7   35.16    0.71 
  -1   1  -7  210.41    3.71 
  -1   1  -7  213.08    3.64 
   1  -1   7  217.48    3.75 
   1  -1   7  212.56    3.54 
  -2   1  -7    8.09    0.44 
  -2   1  -7    8.66    0.40 
   2  -1   7    8.44    0.38 
   2  -1   7    8.97    0.44 
  -3   1  -7  349.18    6.03 
  -3   1  -7  352.84    5.77 
   3  -1   7  350.59    5.93 
   3  -1   7  359.29    5.85 
  -4   1  -7   86.20    1.61 
  -4   1  -7   82.81    1.83 
   4  -1   7   83.43    1.74 
   4  -1   7   84.19    1.72 
  -5   1  -7  105.80    2.26 
   5  -1   7  106.81    2.17 
   5  -1   7  106.49    2.10 
  -6   1  -7   47.15    1.35 
   6  -1   7   48.48    1.19 
   6  -1   7   46.02    1.26 
  -7   1  -7  106.27    2.44 
   7  -1   7  108.31    2.37 
   7  -1   7  114.36    2.24 
  -8   1  -7   43.39    1.40 
   8  -1   7   44.22    1.36 
  -9   1  -7   24.55    1.10 
   9  -1   7   27.70    1.08 
 -10   1  -7   41.65    1.49 
  10  -1   7   40.31    1.44 
 -11   1  -7    2.88    0.61 
  11  -1   7    2.08    0.53 
  12   0  -7   57.73    1.75 
  11   0  -7    7.07    0.68 
 -11   0   7    7.28    0.68 
  10   0  -7   71.54    1.82 
 -10   0   7   72.37    1.84 
   9   0  -7    3.29    0.40 
   9   0  -7    4.14    0.48 
  -9   0   7    3.35    0.42 
  -9   0   7    3.94    0.47 
   8   0  -7  107.38    2.20 
   8   0  -7  108.12    2.25 
  -8   0   7  109.64    2.28 
  -8   0   7  107.65    2.22 
   7   0  -7    0.47    0.26 
   7   0  -7    0.17    0.24 
  -7   0   7    0.00    0.23 
  -7   0   7   -0.15    0.22 
   6   0  -7  161.96    2.96 
   6   0  -7  158.06    2.89 
  -6   0   7  157.61    2.97 
  -6   0   7  163.01    2.96 
   5   0  -7   17.05    0.64 
   5   0  -7   17.33    0.57 
  -5   0   7   17.70    0.62 
  -5   0   7   17.54    0.59 
   4   0  -7   86.47    1.76 
   4   0  -7   86.79    1.62 
  -4   0   7   89.45    1.66 
  -4   0   7   86.15    1.77 
   3   0  -7   64.34    1.19 
   3   0  -7   62.87    1.36 
  -3   0   7   64.37    1.24 
  -3   0   7   61.35    1.37 
   2   0  -7  306.35    5.20 
   2   0  -7  316.45    5.11 
  -2   0   7  314.44    4.98 
  -2   0   7  306.50    5.26 
   1   0  -7   45.30    0.91 
   1   0  -7   43.39    1.04 
  -1   0   7   44.97    0.86 
   0   0  -7  107.74    1.94 
   0   0  -7  107.82    2.04 
   0   0   7  107.78    2.07 
   0   0   7  110.31    1.87 
  -1   0  -7  397.97    6.68 
  -1   0  -7  404.08    6.65 
   1   0   7  412.12    6.75 
   1   0   7  412.24    6.54 
  -2   0  -7   54.79    1.21 
  -2   0  -7   56.28    1.19 
   2   0   7   56.25    1.16 
   2   0   7   55.25    1.21 
  -3   0  -7  207.47    3.52 
  -3   0  -7  206.11    3.65 
   3   0   7  206.52    3.56 
   3   0   7  203.34    3.59 
  -4   0  -7   78.42    1.71 
  -4   0  -7   81.47    1.55 
   4   0   7   80.50    1.61 
   4   0   7   77.95    1.65 
  -5   0  -7  332.82    5.41 
  -5   0  -7  325.21    5.72 
   5   0   7  326.48    5.60 
   5   0   7  327.13    5.53 
  -6   0  -7   31.90    1.04 
   6   0   7   31.67    1.01 
   6   0   7   32.84    0.89 
  -7   0  -7  188.92    3.71 
   7   0   7  188.47    3.62 
   7   0   7  195.94    3.44 
  -8   0  -7    0.96    0.35 
   8   0   7    1.19    0.39 
  -9   0  -7   72.54    1.93 
   9   0   7   69.80    1.85 
 -10   0  -7   30.74    1.24 
  10   0   7   28.67    1.19 
 -11   0  -7   18.55    1.05 
  11   0   7   19.22    1.05 
 -12   0  -7   19.09    1.12 
  12   0   7   19.41    1.11 
  13  -1  -7   35.71    1.45 
  12  -1  -7   14.61    0.94 
  11  -1  -7   40.02    1.38 
  10  -1  -7   19.57    0.93 
 -10   1   7   21.31    0.93 
 -10   1   7   20.71    0.87 
   9  -1  -7   19.65    0.87 
  -9   1   7   21.42    0.83 
  -9   1   7   21.81    0.89 
   8  -1  -7   86.14    1.93 
   8  -1  -7   86.98    1.83 
  -8   1   7   83.89    1.89 
  -8   1   7   82.84    1.88 
   7  -1  -7   23.69    0.84 
   7  -1  -7   26.08    0.83 
  -7   1   7   25.96    0.86 
  -7   1   7   24.61    0.83 
   6  -1  -7  107.42    2.12 
   6  -1  -7  107.29    2.14 
  -6   1   7  108.92    2.12 
  -6   1   7  108.81    2.19 
   5  -1  -7   23.34    0.71 
   5  -1  -7   22.93    0.74 
  -5   1   7   24.66    0.77 
  -5   1   7   24.34    0.69 
   4  -1  -7  283.48    4.68 
   4  -1  -7  274.27    4.77 
  -4   1   7  288.23    4.69 
  -4   1   7  276.01    4.82 
   3  -1  -7   23.64    0.62 
   3  -1  -7   23.97    0.71 
  -3   1   7   24.06    0.58 
  -3   1   7   23.30    0.72 
   2  -1  -7  415.70    6.92 
  -2   1   7  423.60    6.74 
  -2   1   7  423.92    6.77 
  -2   1   7  418.73    6.97 
   1  -1  -7    0.67    0.21 
   1  -1  -7    0.86    0.12 
  -1   1   7    1.27    0.16 
  -1   1   7    0.77    0.20 
   0  -1  -7  160.18    2.73 
   0   1   7  164.22    2.90 
   0   1   7  163.74    2.74 
  -1  -1  -7  101.39    1.78 
  -1  -1  -7   99.33    1.88 
   1   1   7   94.95    1.78 
   1   1   7   98.59    1.88 
  -2  -1  -7  204.91    3.53 
  -2  -1  -7  207.89    3.52 
   2   1   7  202.00    3.49 
   2   1   7  206.56    3.56 
  -3  -1  -7  112.51    2.11 
  -3  -1  -7  114.00    2.16 
   3   1   7  116.02    2.16 
   3   1   7  117.86    2.14 
  -4  -1  -7  170.82    3.11 
  -4  -1  -7  171.85    2.98 
   4   1   7  168.93    3.08 
   4   1   7  171.78    3.01 
  -5  -1  -7  101.77    1.89 
  -5  -1  -7   95.89    2.03 
   5   1   7   98.03    2.02 
   5   1   7  100.61    1.89 
  -6  -1  -7   42.53    0.99 
  -6  -1  -7   40.88    1.17 
   6   1   7   40.54    1.13 
   6   1   7   43.38    1.00 
  -7  -1  -7  174.19    3.46 
  -7  -1  -7  184.03    3.16 
   7   1   7  179.82    3.18 
   7   1   7  176.49    3.42 
  -8  -1  -7   20.32    0.89 
   8   1   7   20.72    0.89 
  -9  -1  -7   59.23    1.69 
   9   1   7   61.54    1.66 
 -10  -1  -7    7.00    0.69 
  10   1   7    7.77    0.69 
 -11  -1  -7   77.17    2.10 
  11   1   7   72.25    2.03 
 -12  -1  -7    4.81    0.67 
  12   1   7    5.64    0.70 
  12  -2  -7    2.28    0.59 
  11  -2  -7   44.35    1.50 
  10  -2  -7    0.93    0.42 
 -10   2   7    0.65    0.34 
   9  -2  -7   77.54    1.98 
  -9   2   7   86.43    1.94 
   8  -2  -7   33.94    1.12 
  -8   2   7   35.57    1.09 
  -8   2   7   35.64    1.10 
   7  -2  -7  169.06    3.27 
   7  -2  -7  178.85    3.16 
  -7   2   7  168.04    3.26 
  -7   2   7  169.00    3.20 
   6  -2  -7   64.77    1.50 
   6  -2  -7   65.94    1.44 
  -6   2   7   65.18    1.50 
  -6   2   7   62.61    1.42 
   5  -2  -7  110.26    2.14 
   5  -2  -7  108.55    2.12 
  -5   2   7  108.07    2.18 
  -5   2   7  108.29    2.05 
   4  -2  -7   73.88    1.53 
   4  -2  -7   73.92    1.56 
  -4   2   7   74.97    1.44 
  -4   2   7   74.68    1.60 
   3  -2  -7   10.46    0.50 
   3  -2  -7   10.80    0.44 
  -3   2   7   10.62    0.49 
  -3   2   7   11.23    0.36 
   2  -2  -7  228.40    3.80 
   2  -2  -7  221.22    3.91 
  -2   2   7  228.89    3.68 
   1  -2  -7   12.51    0.52 
  -1   2   7   12.86    0.43 
  -1   2   7   12.13    0.48 
  -1   2   7   12.35    0.28 
   0  -2  -7  117.62    1.93 
   0  -2  -7  117.87    2.18 
   0   2   7  115.15    2.06 
   0   2   7  113.70    2.14 
  -1  -2  -7    2.89    0.19 
  -1  -2  -7    2.69    0.27 
   1   2   7    3.05    0.26 
   1   2   7    3.11    0.25 
  -2  -2  -7  204.69    3.43 
  -2  -2  -7  206.01    3.51 
   2   2   7  201.84    3.49 
   2   2   7  200.34    3.47 
  -3  -2  -7   17.38    0.54 
  -3  -2  -7   16.84    0.56 
   3   2   7   17.83    0.58 
   3   2   7   17.16    0.54 
  -4  -2  -7  247.88    4.22 
  -4  -2  -7  252.00    4.32 
   4   2   7  248.61    4.31 
   4   2   7  250.01    4.21 
  -5  -2  -7    1.67    0.27 
  -5  -2  -7    0.72    0.20 
   5   2   7    0.45    0.22 
   5   2   7    0.59    0.19 
  -6  -2  -7  117.74    2.20 
  -6  -2  -7  115.18    2.36 
   6   2   7  120.96    2.14 
   6   2   7  111.91    2.34 
  -7  -2  -7   43.67    1.24 
  -7  -2  -7   43.72    1.06 
   7   2   7   43.72    1.24 
  -8  -2  -7   92.26    2.14 
  -8  -2  -7   96.34    1.91 
   8   2   7   96.88    2.17 
  -9  -2  -7   23.55    1.00 
   9   2   7   26.79    1.04 
 -10  -2  -7   56.55    1.66 
  10   2   7   57.84    1.66 
 -11  -2  -7   23.52    1.10 
  11   2   7   21.75    1.06 
 -12  -2  -7    8.25    0.80 
  12   2   7    7.36    0.79 
  11  -3  -7   47.44    1.61 
  10  -3  -7    4.77    0.63 
 -10   3   7    4.10    0.53 
   9  -3  -7   33.81    1.22 
  -9   3   7   34.73    1.15 
   8  -3  -7    0.89    0.34 
  -8   3   7    0.35    0.31 
   7  -3  -7  114.21    2.42 
  -7   3   7  113.62    2.40 
   6  -3  -7    5.18    0.48 
   6  -3  -7    7.03    0.45 
  -6   3   7    5.58    0.44 
  -6   3   7    6.01    0.49 
   5  -3  -7   80.07    1.63 
   5  -3  -7   76.44    1.70 
  -5   3   7   75.94    1.71 
  -5   3   7   76.79    1.57 
   4  -3  -7    3.68    0.36 
   4  -3  -7    3.99    0.36 
  -4   3   7    4.11    0.32 
  -4   3   7    4.47    0.39 
   3  -3  -7   89.31    1.76 
   3  -3  -7   90.85    1.81 
  -3   3   7   86.01    1.58 
  -3   3   7   87.77    1.82 
   2  -3  -7  105.19    2.00 
   2  -3  -7  107.46    2.07 
  -2   3   7  104.27    2.06 
  -2   3   7  108.54    1.79 
   1  -3  -7  118.74    2.22 
  -1   3   7  112.52    2.18 
  -1   3   7  117.61    2.13 
   0  -3  -7   83.85    1.69 
   0   3   7   84.29    1.62 
   0   3   7   84.26    1.64 
  -1  -3  -7  212.26    3.39 
  -1  -3  -7  206.79    3.61 
   1   3   7  207.11    3.56 
   1   3   7  208.60    3.57 
  -2  -3  -7  155.79    2.62 
  -2  -3  -7  156.16    2.77 
   2   3   7  152.84    2.75 
   2   3   7  152.74    2.70 
  -3  -3  -7   31.83    0.83 
  -3  -3  -7   32.55    0.76 
   3   3   7   31.63    0.84 
   3   3   7   31.95    0.75 
  -4  -3  -7  103.37    1.95 
  -4  -3  -7  102.93    1.97 
   4   3   7  102.41    2.03 
   4   3   7  101.18    1.85 
  -5  -3  -7    0.26    0.19 
  -5  -3  -7   -0.11    0.19 
   5   3   7    0.74    0.18 
   5   3   7    0.45    0.22 
  -6  -3  -7   49.15    1.15 
  -6  -3  -7   49.27    1.23 
   6   3   7   48.42    1.00 
   6   3   7   48.38    1.28 
  -7  -3  -7   25.73    0.87 
  -7  -3  -7   26.28    0.79 
   7   3   7   25.17    0.90 
  -8  -3  -7  109.58    2.12 
  -8  -3  -7  104.13    2.29 
   8   3   7  103.40    2.31 
  -9  -3  -7   16.50    0.67 
  -9  -3  -7   16.39    0.79 
   9   3   7   16.48    0.79 
 -10  -3  -7   60.26    1.68 
  10   3   7   55.22    1.64 
 -11  -3  -7    4.07    0.57 
  11   3   7    3.55    0.55 
 -12  -3  -7   55.23    1.77 
  12   3   7   56.02    1.77 
 -13  -3  -7   19.02    1.11 
  13   3   7   16.86    1.05 
  11  -4  -7   17.51    1.07 
  10  -4  -7   16.71    0.97 
 -10   4   7   16.38    0.88 
   9  -4  -7   40.60    1.39 
  -9   4   7   40.49    1.28 
   8  -4  -7    7.26    0.65 
  -8   4   7    8.02    0.61 
   7  -4  -7   46.20    1.37 
  -7   4   7   47.15    1.33 
   6  -4  -7    1.94    0.38 
  -6   4   7    2.86    0.40 
   5  -4  -7  127.53    2.37 
   5  -4  -7  123.20    2.50 
  -5   4   7  121.01    2.50 
   4  -4  -7    0.07    0.24 
   4  -4  -7    0.71    0.26 
  -4   4   7    0.31    0.24 
  -4   4   7    0.23    0.17 
   3  -4  -7   71.36    1.54 
   3  -4  -7   73.37    1.56 
  -3   4   7   70.40    1.58 
  -3   4   7   70.09    1.34 
   2  -4  -7    2.14    0.30 
   2  -4  -7    2.84    0.30 
  -2   4   7    2.73    0.30 
  -2   4   7    2.54    0.17 
   1  -4  -7  171.33    3.07 
  -1   4   7  169.46    3.03 
   0  -4  -7   22.44    0.69 
   0   4   7   24.36    0.69 
   0   4   7   22.95    0.67 
  -1  -4  -7  287.09    4.87 
   1   4   7  286.52    4.84 
   1   4   7  292.29    4.85 
  -2  -4  -7   20.80    0.65 
  -2  -4  -7   21.15    0.49 
   2   4   7   19.46    0.63 
   2   4   7   20.63    0.58 
  -3  -4  -7   89.99    1.64 
  -3  -4  -7   89.32    1.78 
   3   4   7   88.13    1.64 
   3   4   7   89.77    1.81 
  -4  -4  -7   20.55    0.65 
  -4  -4  -7   19.88    0.58 
   4   4   7   19.60    0.52 
   4   4   7   19.11    0.69 
  -5  -4  -7   21.04    0.67 
  -5  -4  -7   22.03    0.71 
   5   4   7   19.43    0.73 
   5   4   7   21.65    0.52 
  -6  -4  -7   89.50    1.82 
  -6  -4  -7   90.20    1.85 
   6   4   7   85.72    1.92 
  -7  -4  -7   24.99    0.79 
  -7  -4  -7   23.35    0.83 
   7   4   7   23.87    0.90 
  -8  -4  -7   67.13    1.64 
  -8  -4  -7   66.79    1.53 
   8   4   7   67.62    1.70 
  -9  -4  -7    1.94    0.42 
  -9  -4  -7    2.17    0.34 
   9   4   7    2.26    0.44 
 -10  -4  -7   93.50    2.25 
 -10  -4  -7   98.87    2.04 
  10   4   7   91.03    2.26 
 -11  -4  -7    0.12    0.40 
  11   4   7    0.10    0.38 
 -12  -4  -7   36.56    1.36 
  12   4   7   37.86    1.42 
 -13  -4  -7    1.43    0.56 
  13   4   7    0.81    0.51 
  10  -5  -7   38.17    1.47 
 -10   5   7   39.81    1.42 
   9  -5  -7   21.58    1.06 
  -9   5   7   22.94    1.02 
   8  -5  -7   37.51    1.29 
  -8   5   7   36.66    1.25 
   7  -5  -7   15.76    0.83 
  -7   5   7   15.63    0.80 
   6  -5  -7   26.52    0.99 
  -6   5   7   25.65    0.96 
   5  -5  -7   32.56    1.06 
  -5   5   7   31.63    1.02 
   4  -5  -7   59.77    1.49 
   4  -5  -7   63.58    1.40 
  -4   5   7   61.36    1.51 
   3  -5  -7   89.22    1.92 
   3  -5  -7   95.06    1.90 
  -3   5   7   92.53    1.97 
   2  -5  -7   34.17    0.94 
   2  -5  -7   33.42    0.94 
  -2   5   7   32.91    0.96 
   1  -5  -7  131.13    2.50 
  -1   5   7  134.18    2.51 
   0  -5  -7    0.48    0.21 
   0   5   7    0.26    0.19 
   0   5   7    0.21    0.19 
  -1  -5  -7  255.00    4.49 
   1   5   7  269.68    4.49 
   1   5   7  263.24    4.49 
  -2  -5  -7    9.75    0.46 
  -2  -5  -7    9.48    0.31 
   2   5   7    9.82    0.48 
   2   5   7   10.05    0.41 
  -3  -5  -7  152.49    2.64 
  -3  -5  -7  152.82    2.82 
   3   5   7  157.21    2.69 
   3   5   7  152.34    2.85 
  -4  -5  -7    9.17    0.40 
  -4  -5  -7    7.86    0.46 
   4   5   7    8.17    0.33 
   4   5   7    7.90    0.48 
  -5  -5  -7   58.07    1.34 
  -5  -5  -7   58.98    1.27 
   5   5   7   56.42    1.39 
   5   5   7   57.77    1.09 
  -6  -5  -7  138.93    2.67 
  -6  -5  -7  143.72    2.66 
   6   5   7  139.45    2.78 
  -7  -5  -7   67.98    1.54 
  -7  -5  -7   65.40    1.52 
   7   5   7   63.06    1.61 
  -8  -5  -7   25.78    0.86 
  -8  -5  -7   26.90    0.93 
   8   5   7   26.06    0.97 
  -9  -5  -7   21.10    0.78 
  -9  -5  -7   20.11    0.86 
   9   5   7   19.31    0.88 
 -10  -5  -7   36.85    1.09 
 -10  -5  -7   37.09    1.23 
  10   5   7   34.63    1.23 
 -11  -5  -7    8.18    0.73 
 -11  -5  -7   10.70    0.65 
  11   5   7   10.37    0.76 
 -12  -5  -7   29.48    1.22 
  12   5   7   29.45    1.25 
 -13  -5  -7   11.56    0.84 
  13   5   7    8.75    0.85 
 -10   6   7   10.78    0.82 
   9  -6  -7    0.67    0.47 
  -9   6   7   -0.10    0.42 
   8  -6  -7   67.40    1.89 
  -8   6   7   65.03    1.80 
   7  -6  -7    4.07    0.56 
  -7   6   7    4.22    0.53 
   6  -6  -7   52.85    1.53 
  -6   6   7   54.69    1.52 
   5  -6  -7    9.58    0.65 
  -5   6   7   10.83    0.64 
   4  -6  -7  133.53    2.74 
  -4   6   7  136.48    2.77 
   3  -6  -7   65.32    1.58 
   3  -6  -7   69.01    1.52 
  -3   6   7   64.16    1.58 
   2  -6  -7  100.68    2.01 
   2  -6  -7   98.69    2.06 
  -2   6   7   95.43    2.06 
   1  -6  -7   64.48    1.51 
   1  -6  -7   65.56    1.48 
  -1   6   7   67.96    1.53 
  -1   6   7   68.71    1.53 
   0  -6  -7   39.29    1.01 
   0   6   7   37.94    1.03 
   0   6   7   38.76    1.02 
  -1  -6  -7  169.65    3.11 
   1   6   7  169.39    3.13 
   1   6   7  176.41    3.11 
  -2  -6  -7   16.17    0.41 
  -2  -6  -7   14.64    0.58 
   2   6   7   15.92    0.55 
   2   6   7   15.86    0.63 
  -3  -6  -7  159.70    2.69 
  -3  -6  -7  151.18    2.89 
   3   6   7  160.06    2.77 
   3   6   7  154.86    2.92 
  -4  -6  -7   30.90    0.75 
  -4  -6  -7   28.54    0.88 
   4   6   7   29.79    0.92 
   4   6   7   29.59    0.72 
  -5  -6  -7  131.46    2.41 
  -5  -6  -7  129.44    2.53 
   5   6   7  127.28    2.58 
   5   6   7  132.44    2.25 
  -6  -6  -7    7.37    0.47 
  -6  -6  -7    7.60    0.45 
   6   6   7    6.66    0.49 
  -7  -6  -7  157.33    3.01 
  -7  -6  -7  159.22    3.03 
   7   6   7  160.40    3.16 
  -8  -6  -7   22.67    0.83 
  -8  -6  -7   23.17    0.84 
   8   6   7   21.02    0.88 
  -9  -6  -7   34.53    1.11 
  -9  -6  -7   33.56    1.05 
   9   6   7   32.79    1.14 
 -10  -6  -7    6.85    0.56 
 -10  -6  -7    7.42    0.63 
  10   6   7    7.86    0.69
[truncated: 348,546 more chars]
